# Supplementary material for: Home Scholarly Culture, Book Selection Reason, and Academic Performance: Pathways to Book Reading Interest among Secondary School Students
Source: Eur J Investig Health Psychol Educ. 2021 Jun 1;11(2):468–95. doi: 10.3390/ejihpe11020034 (PMC8314380; doi:10.3390/ejihpe11020034)
Supplement: Supplementary file 1 [file ejihpe-11-00034-s001.zip › SciData_STEM.csv]

q_FormDataId	q_63	q_83	School	Grade	Sex	APS45	HighAPS	LowAPS	APSVNEN	RankingF	NumberofChi	Readbook	Topic	FutureJob_VN	FutureJob_VN (translated)	CareerFat	CareerFat (translated)	CarFatGr	AgeFat	EduFat	CareerMot	CareerMot (translated)	CarMotGr	AgeMot	EduMot	EcoStt	KnowledgeInc	EstIncome	Buybook	Hobby	Hobby_Read	TimeSci	TimeSoc	Readstory	Typebook	Typebook_Other	Reason	Reason_PR	Source	PrioAct	AftAct	Read_like	EncourAct	MostlikedAct	Bookcase	BookcaseAvailability	Notread_like
2177	2.101	43076	4	7	Female	NA	NA	NA	0	1	3	1	d	Công an	Police officer	Thợ sửa chữa	Worker	Labor	40	UnderHi	Công nhân	Worker	Labor	37	UnderHi	med	no	NA	1	f	1	1	1	1	f	cổ tích	a	1	NA	d	b	Cánh buồm đỏ thắm Cho tôi xin 1 vé đi tuổi thơ	yes	NA	a	1	Ngồi khóc trên cây Ai và Ki ở xứ sở Những con số tàng hình Đại Việt sử kí
2764	8.98	43076	8	7	Female	NA	NA	NA	0	2	3	1	b	tiểu thuyết gia	Poem	Tài xế	Driver	Labor	39	UnderHi	Công nhân	Worker	Labor	37	UnderHi	rich	yes	NA	1	a	0	2	NA	1	f	hạt giống tâm hồn	a	1	borrow	b	a	Hạt giống tâm hồn Không gia đình	yes	b	a	1	Không gia đình Hạt giống tâm hồn
4886	10.98	43075	5	6	Female	NA	NA	NA	0	1	2	1	a	không xác định	NA	kinh doanh	Businessman	Labor	58	UnderHi	công nhân	Worker	Labor	NA	NA	rich	no	5000000	1	b	1	2	2	1	b	NA	a	1	buy	b	b	những điều cực đỉnh về tự nhiên và xã hội tiếng hú giữa rừng đêm	yes	a	a	1	thiên hạ thật đáng ngạc nhiên đại dương khó thương hạt giống tâm hồn
312	4.193	43075	2	7	Female	10	1	0	0	2	3	1	b	Giáo viên	Teacher	làm ruộng	Farmer	Labor	40	UnderHi	Làm ruộng	Farmer	Labor	33	UnderHi	rich	yes	NA	1	f	1	1	1	0	f	Truyện tranh	a	1	buy	d	a	Đô rê mon Tý Quậy	yes	d	a	1	Shin cậu bé bút chì Tấm Cấm Truyện cổ tích Việt nam
375	4.257	43075	2	7	Male	10	1	0	0	4	4	1	a	Thợ cơ khí	Engineer	làm ruộng	Farmer	Labor	57	UnderHi	Công nhân	Worker	Labor	52	UnderHi	rich	no	NA	1	f	1	2	1	0	e	NA	a	1	buy	c	a	Cô nan Ngọc rồng	yes	c	a	1	Tí Quậy Đô rê mon
2677	15.47	43071	15	6	Female	10	1	0	0	1	3	1	c	Bác sĩ	Doctor	Nông dân	Farmer	Labor	39	UnderHi	Nông dân	Farmer	Labor	32	UnderHi	med	no	NA	1	a	0	1	1	0	e	NA	a	1	buy	b	a	Chiếc lá thuộc bài, buratino	yes	a	a	1	doraemon, conan, tắt đèn
3289	16.521	43074	16	9	Female	10	1	0	0	2	2	1	a	giáo viên	Teacher	bộ đội	Soldier	Labor	46	PostGrad	giáo viên	Teacher	Intellectuals	45	Uni	rich	no	NA	0	c	1	1	1	1	c	NA	a	1	borrow	d	d	truyện kiều truyện người con gái nam xương	yes	a	a	1	thế giới vũ vụ khám phá về gen người pewpew và những người bạn
4732	10.51		5	9	Male	10	1	0	0	1	3	1	f	đầu bếp	Chef	nông dân	Farmer	Labor	44	NA	công nhân	Worker	Labor	36	NA	med	no	4000000	1	e	1	2	2	0	e	NA	a	1	borrow	d	d	lịch sử việt nam bằng tranh tuyển tập nguyễn nhật ánh	yes	d	a	1	sông đông êm đềm conan mùa hoa thuốc phiện cuối cùng
2564	13.62	43073	13	6	Male	9.9	1	0	0	1	2	1	c	đầu bếp	Chef	Nông dân	Farmer	Labor	40	Hi	Công nhân	Worker	Labor	31	Hi	med	no	NA	1	c	1	1	1	0	f	truyện tranh	a	1	borrow	a	a	doraemon truyện cổ tích	yes	d	a	1	tấm cám shin cậu bé bút chì truyện cười
1593	9.173	43073	9	8	Male	9.8	1	0	0	2	2	1	b	Kĩ sư	Engineer	Kĩ sư	Engineer	Labor	47	Uni	Giáo viên	Teacher	Intellectuals	44	Uni	med	no	NA	1	b	1	2	2	1	c	NA	a	1	buy	a	d	Hai vạn dặm dưới đáy biển Works of Satoshi Kamiya 1	yes	a	a	1	Bách khoa toàn thư Works of Satoshi Kamiya Báo khoa học khám phá
1598	9.178	43073	9	8	Female	9.8	1	0	0	2	4	1	a	Kế toán	Accountant	Thợ xây	Worker	Labor	44	UnderHi	Làm ruộng	Farmer	Labor	43	UnderHi	med	no	NA	1	e	1	2	2	1	a	NA	a	1	borrow	b	d	Quà tặng cuộc sống Truyện ngắn Nam Cao	yes	a	a	1	Tôi tài giỏi, bạn cũng thế Bách khoa toàn thư Tắt đèn
1705	9.281	43073	9	9	Female	9.8	1	0	0	3	3	1	e	bác sĩ	Doctor	làm ruộng	Farmer	Labor	54	UnderHi	Làm ruộng	Farmer	Labor	51	UnderHi	med	no	NA	1	a	0	3	1	0	a	NA	a	1	borrow	d	b	Truyện tranh nữ hoàng Ai cập Những cuốn sách về đạo đức con người	yes	b	a	1	Tôi muốn biết ở đâu Hạt giống gieo mầm tâm hồn đứa trẻ
986	14.4	43071	14	6	Male	9.75	1	0	0	1	3	1	a	Bác sĩ	Doctor	Xây dựng	Worker	Labor	39	Hi	Công nhân	Worker	Labor	38	Hi	med	no	NA	1	b	1	2	2	1	c	NA	a	1	buy	d	a	Những tấm gương người xưa Ươm mầm tài năng học toán	yes	a	a	1	Văn học tuổi trẻ Truyện tranh Doraemon
804	14.25	43071	14	6	Male	9.7	1	0	0	1	2	1	c	Nhà khoa học	Scientist	Giáo viên	Teacher	Intellectuals	40	PostGrad	Giáo viên	Teacher	Intellectuals	38	PostGrad	med	no	NA	1	a	0	2	2	0	c	NA	a	1	borrow	b	a	Ươm mầm tài năng toán học 360 động từ bất quy tắc	yes	b	a	1	Sherlock Home Conan Sách khoa học
1230	1.91	43077	1	8	Male	9.6	1	0	0	2	2	1	d	Kĩ sư tin học	Engineer	Nông dân	Farmer	Labor	56	Uni	Ngân hàng	Banker	Intellectuals	54	Uni	med	no	NA	1	a	0	3	1	1	c	NA	a	1	buy	c	a	Những câu chuyện khoa học 10 vạn câu hỏi vì sao Vật lí - Thiên văn	yes	b	a	1	Dế Mèn phiêu lưu kí Hai vạn dặm dưới đáy biển Bách khoa toàn thư
2377	16.11	43074	16	6	Female	9.6	1	0	0	1	3	1	e	công an	Police officer	làm nông	Farmer	Labor	34	UnderHi	làm nông	Farmer	Labor	34	UnderHi	med	no	NA	1	a	0	1	1	1	f	sách về lịch sử	a	1	borrow	b	a	Sử ta, chuyện xưa kể lại (tập 4) Bí mật học đường	yes	d	a	1	Doremon Shin cậu bé bút chì Sử ta chuyên xưa kể lại (tập 1,2,3)
2613	8.175	43076	8	7	Female	9.6	1	0	0	3	3	1	b	Giảng viên	Teacher	Nông dân	Farmer	Labor	NA	NA	Giáo viên	Teacher	Intellectuals	NA	Uni	med	no	NA	1	f	1	1	1	0	a	NA	a	1	buy	a	d	câu chuyện khoa học Trạng Quỳnh	yes	a	a	1	Sherlock Homles Harry Potter Truyện Kiều
2867	16.327	43074	16	8	Male	9.6	1	0	0	1	2	1	a	Kiến trúc sư	Architect	Xây dựng	Worker	Labor	35	Hi	Công nhân	Worker	Labor	33	Hi	med	no	NA	1	e	1	2	1	0	f	Truyện thiêu nhi	a	1	borrow	c	a	Hạt giống tâm hồn Em có thể làm được	yes	b	a	1	Dế mèn phiêu lưu kí Ảo thuật cho bé Twilight
4062	10.156	43075	5	7	Male	9.6	1	0	0	1	2	1	NA	bác sĩ	Doctor	giáo viên	Teacher	Intellectuals	42	PostGrad	giáo viên	Teacher	Intellectuals	35	PostGrad	med	yes	13000000	1	a	0	2	1	1	c	NA	a	1	buy	c	d	1000 câu đó phát triển trí tuệ khai phá tiềm năng kĩ năng sống dành cho học sinh	yes	a	a	1	1000 câu đố phát triển trí tuệ thách thức IQ bí ẩn vũ trụ học chơi cầu lông
151	89	43075	2	9	Male	9.5	1	0	0	2	2	1	d	công nhân	Worker	làm ruộng	Farmer	Labor	43	Hi	làm ruộng	Farmer	Labor	35	Hi	rich	yes	3000000	1	f	1	1	2	0	e	NA	a	1	buy	NA	a	Sách dạy nghề	yes	c	a	1	NA
297	4.178	43075	2	7	Female	9.5	1	0	0	2	2	1	b	Cô giáo	Teacher	Làm ruộng	Farmer	Labor	41	UnderHi	Làm ruộng	Farmer	Labor	39	UnderHi	med	yes	NA	1	f	1	1	1	0	a	NA	a	1	buy	a	a	Conan Tý Quậy	yes	a	a	1	Shin - Cậu bé bút chì Sách danh nhân Việt Nam
303	4.184	43075	2	7	Male	9.5	1	0	0	2	3	1	f	Thợ cơ khí	Engineer	Làm ruộng	Farmer	Labor	44	UnderHi	Làm ruộng	Farmer	Labor	41	UnderHi	poor	no	NA	1	f	1	1	1	0	f	Bảy viên ngọc rồng	a	1	buy	b	a	Bảy viên ngọc rồng Sách giáo khoa	yes	d	a	1	Doraemon Conan Atlas
313	4.194	43075	2	7	Male	9.5	1	0	0	1	4	1	d	phi công	Pilot	làm ruộng	Farmer	Labor	41	UnderHi	giáo viên	Teacher	Intellectuals	36	Uni	med	no	NA	1	b	1	2	1	0	f	Truyện tranh	a	1	buy	a	a	cônan Dragon ball supper	no	NA	a	1	Ếch ngồi đáy giếng Bóp nát quả cam Truyện cổ tích
314	4.195	43075	2	7	Female	9.5	1	0	0	2	3	1	b	bác sĩ	Doctor	làm ruộng	Farmer	Labor	39	Hi	Làm ruộng	Farmer	Labor	36	Hi	med	yes	NA	1	b	1	2	2	0	b	NA	a	1	borrow	b	b	Shin cậu bé bút chì Cô nan	yes	a	a	1	Truyện Mỵ châu Trọng Thủy TRuyện về danh nhân thành đạt Truyện về lịch sử đất nước
655	11.198	43071	11	9	Female	9.5	1	0	0	2	2	1	b	Đầu bếp	Chef	Làm ruộng	Farmer	Labor	42	Hi	Làm ruộng	Farmer	Labor	40	UnderHi	med	no	NA	1	b	1	1	2	0	a	NA	a	1	borrow	a	b	Bỉ vỏ - Nguyên Hồng Văn học Việt Nam	yes	a	a	1	Shin - cậu bé bút chì Những ngày thơ ấu - Nguyên Hồng Đời thừa - Nam Cao
919	11.154	43071	11	8	Female	9.5	1	0	0	2	3	1	a	Bác sĩ	Doctor	Nông dân	Farmer	Labor	44	UnderHi	Nông dân	Farmer	Labor	39	UnderHi	rich	no	NA	1	b	1	1	2	0	a	NA	a	1	borrow	a	a	Nữ hiệp quái chiêu Toán học	yes	b	a	1	Sự tích Tấm Cám Hoàng tử Ếch Sự tích cây nêu ngày tết
948	11.1	43071	11	6	Male	9.5	1	0	0	1	2	1	f	Công an	Police officer	Giáo viên	Teacher	Intellectuals	44	Uni	Nông dân	Farmer	Labor	36	Uni	med	no	NA	1	b	1	2	2	0	d	NA	a	1	borrow	d	a	Thám tử lừng danh Conan Doraemon	yes	a	a	1	Thám tử lừng danh Conan Hải tặc vũ trụ Nhà thám hiểm vũ trụ
1131	14.165	43071	14	9	Female	9.5	1	0	0	2	3	1	d	Nhà văn	Writer	Nông dân	Farmer	Labor	54	Hi	Nông dân	Farmer	Labor	46	Hi	med	no	NA	1	a	0	1	1	0	e	NA	a	1	buy	a	a	Câu chuyện đời tôi Tỉ phú bán giày	yes	a	a	1	Khám phá thế giới 10 vạn câu hỏi vì sao Thế giới động vật
2676	15.46	43071	15	6	Male	9.5	1	0	0	4	4	1	a	Kế toán	Accountant	tự do	Freelancer	Labor	36	Hi	Công nhân	Worker	Labor	34	Hi	med	no	NA	0	a	0	2	2	0	a	NA	a	1	borrow	c	a	tấm lòng cao cả, hạt giống tâm hồn	yes	a	a	1	baby boss, tắt đèn, doraemon
2896	16.343	43074	16	8	Female	9.5	1	0	0	4	4	1	c	Bác sĩ	Doctor	Xây dựng	Worker	Labor	50	UnderHi	Giáo viên	Teacher	Intellectuals	45	PostGrad	med	no	NA	1	a	0	3	2	1	b	NA	a	1	buy	b	a	Hạt giống tâm hồn Phương pháp phát triển khả năng tư duy sáng tạo cho học sinh	yes	b	a	1	Conan Cây tre trăm đốt Hạt giống tâm hồn tập 3
3690	15.182	43071	15	8	Male	9.5	1	0	0	3	3	1	e	Bộ đội	Soldier	Bộ đội	Soldier	Labor	49	Hi	Nông dân	Farmer	Labor	49	Hi	med	no	NA	1	a	0	2	2	0	f	Khoa học tự nhiên	a	1	borrow	d	b	những kỳ quan thế giới, ba ngày ở thế giới tí hon	yes	c	a	1	chiến tranh thế giới, tắt đèn, dond ki hô tê
3711	15.187	43071	15	8	Male	9.5	1	0	0	3	3	1	a	Kiến trúc sư	Architect	Bảo vệ	Guard	Labor	56	Uni	Nông dân	Farmer	Labor	46	Hi	med	no	NA	1	a	0	3	2	0	c	NA	a	1	borrow	d	a	Danh nhân thế giới Anh-xtanh, Kỳ quan thế giới	yes	b	a	1	Danh nhân thế giới " Newton", Dế mèn phưu lưu ký, cuộc truy tìm kho vũ khí
3725	15.193	43071	15	8	Female	9.5	1	0	0	1	2	1	d	Nhà kinh doanh	Businessman	Nông dân	Farmer	Labor	42	UnderHi	Nông dân	Farmer	Labor	39	NA	med	no	NA	1	a	0	1	1	0	c	NA	a	1	borrow	b	b	Kỳ quan thế giới, ba ngày ở thế giới tý hon	yes	a	a	1	Anhxtanh, Newton, Những nhà bác học lớn trên thế giới
3728	15.195	43071	15	8	Female	9.5	1	0	0	1	2	1	c	Hướng dẫn viên du lịch	Tour guide	Công nhân	Worker	Labor	36	Hi	Công nhân	Worker	Labor	34	Hi	med	no	NA	1	b	1	2	1	1	e	NA	a	1	borrow	c	b	Ngữ pháp tiếng anh, Conan	yes	c	a	1	Tắt đèn, Truyện Kiều, Truyện kể về danh nhân thế giới
3730	15.196	43071	15	8	Female	9.5	1	0	0	1	2	1	d	Nhân viên IT	Programmer	Kinh doanh	Businessman	Labor	40	Hi	Giáo viên	Teacher	Intellectuals	40	Uni	med	no	NA	1	b	1	1	1	1	f	truyện tranh	a	1	borrow	c	b	Tý Quậy, Doraemon	yes	a	a	1	Cô giáo đến từ hôm qua, truyện kiều, Cho tôi xin một vé đi tuổi thơ
3771	15.212	43071	15	8	Male	9.5	1	0	0	4	5	1	d	công an	Police officer	Công an	Police officer	Labor	57	Uni	Giáo viên	Teacher	Intellectuals	48	Uni	med	no	NA	1	a	0	3	2	1	a	NA	a	1	borrow	b	a	các kỳ quan thế giới, hạt giống tâm hồn	yes	a	a	1	Thạch sanh, Alice ở xứ sở thần tiên, when? muốn biết khi nào
4726	10.503		5	9	Male	9.5	1	0	0	2	2	1	a	công nhân	Worker	nông dân	Farmer	Labor	47	UnderHi	nông dân	Farmer	Labor	46	UnderHi	med	yes	3000000	1	f	1	1	2	0	e	NA	a	1	borrow	d	d	những phát minh quý óc sáng suất	yes	c	a	1	sông đông êm đềm chiến tranh và hòa bình mùa hoa thuốc phiện cuối cùng
4821	10.36	43074	5	6	Female	9.5	1	0	0	1	2	1	c	giáo viên	Teacher	y tế trường học	Doctor	Intellectuals	36	Uni	y tá	Nurse	Intellectuals	35	Uni	med	no	NA	1	a	0	2	2	1	b	NA	a	1	buy	d	b	con bin trắng tại đen kĩ năng sống dành cho học sinh	yes	b	a	1	túp lều bác tôm dế mèn phiêu lưu kí chiến tranh và hòa bình
4932	7.329	43071	7	9	Male	9.5	1	0	0	1	2	1	a	Lập trình viên	Programmer	Giáo viên	Teacher	Intellectuals	41	Uni	Giáo viên	Teacher	Intellectuals	36	Uni	poor	no	NA	1	f	1	1	1	0	f	Truyện tranh	a	1	buy	b	d	Giáo trình ngôn ngữ lập trình C Lập trình Pascal	yes	a	a	1	Doraemon Tuổi thơ dữ dội Cô gái đến từ hôm qua
1309	1.138	43077	1	9	Female	9.3	1	0	0	1	3	1	d	Ca sĩ	Singer	Cán bộ cấp xã	Public servant	Intellectuals	40	Hi	Giáo viên	Teacher	Intellectuals	37	Hi	med	no	NA	1	b	1	1	1	0	f	Truyện tranh	a	1	buy	a	a	Tý Quậy Doraemon	yes	b	a	1	Doraemon Đội quân siêu quậy Cậu bé bút chì
2278	8.243	43076	8	9	Male	9.3	1	0	0	1	2	1	b	Giáo viên	Teacher	Hải quân	Soldier	Labor	50	Uni	Buôn bán	Seller	Labor	41	Uni	med	no	NA	1	f	1	2	2	0	a	NA	a	1	borrow	d	c	Cuộc đời của Pi Sherlock Homles	yes	d	a	1	Hai vạn dặm dưới đáy biển Dế Mèn phiêu lưu kí Không gia đình
2436	16.31	43074	16	6	Female	9.3	1	0	0	1	2	1	a	diễn viên	Actor	giáo viên	Teacher	Intellectuals	40	Uni	giáo viên	Teacher	Intellectuals	37	Uni	med	yes	NA	1	b	1	2	2	1	a	NA	a	1	borrow	d	c	học cách học tập phương pháp phát triển khả năng tư duy suy luận cho học sinh	yes	c	a	1	serlock holmes phương pháp nâng cao khả năng suy nghĩ cho học sinh những câu chuyện thần thoại hy lạp
2900	16.347	43074	16	8	Female	9.3	1	0	0	2	2	1	c	Giáo viên	Teacher	Giáo viên	Teacher	Intellectuals	45	PostGrad	Giáo viên	Teacher	Intellectuals	43	Uni	med	yes	NA	1	c	1	2	2	1	a	NA	a	1	buy	d	a	Hạt giống tâm hồn Những tâm hồn cao thượng	NA	b	a	1	Chuyện con ốc sên muốn biết tại sao lại chậm Tạm biệt em ổn Đạo tình
3693	15.183	43071	15	8	Male	9.3	1	0	0	1	2	1	a	công an	Police officer	Nông dân	Farmer	Labor	43	Hi	Công nhân	Worker	Labor	39	NA	med	NA	5000000	0	a	0	2	2	0	f	thiên văn học	a	1	borrow	b	b	ba ngày ở nước tý hon, hoang mạc kỳ thú	yes	c	a	1	tắt đèn, đôn ki hô tê, lão hạc
3714	15.188	43071	15	8	Female	9.3	1	0	0	3	3	1	c	Quân y	Doctor	Nông dân	Farmer	Labor	50	UnderHi	Nông dân	Farmer	Labor	50	UnderHi	med	no	NA	1	a	0	2	1	0	b	NA	a	1	buy	b	b	học làm nhà phát minh, danh nhân thế giới "Anh-xtanh"	yes	b	a	1	conan, ngữ pháp tiếng anh, những nhà bác học Thế giới
3836	3.187	43071	6	7	Female	9.3	1	0	0	2	3	1	c	Tiếp viên hàng không	Flight attendant	Bộ đội	Soldier	Labor	45	NA	Giáo viên	Teacher	Intellectuals	41	NA	med	no	NA	1	f	1	2	2	0	e	NA	a	1	buy	b	a	Hướng dẫn nấu ăn Hướng dẫn nghề	yes	a	a	1	Tôi thấy hoa vàng trên cỏ xanh Khám phá thiên nhiên Thế giới động vật
4933	7.33	43071	7	9	Female	9.3	1	0	0	1	2	1	c	Giáo viên	Teacher	Giáo viên	Teacher	Intellectuals	47	Uni	Giáo viên	Teacher	Intellectuals	37	Uni	poor	no	NA	1	f	1	2	1	0	f	Truyện tranh	a	1	buy	a	d	Conan 20 bài học cuộc sống	yes	a	a	1	Tuổi thơ dữ dội Cô gái đến từ hôm qua Tôi thấy hoa vàng trên cỏ xanh
310	4.191	43075	2	7	Male	9.25	1	0	0	3	3	1	e	Công an	Police officer	Làm ruộng	Farmer	Labor	44	UnderHi	làm ruộng	Farmer	Labor	42	UnderHi	rich	no	NA	1	f	1	1	2	1	d	NA	a	1	buy	d	b	Conan Bảy viên Ngọc rồng	yes	d	a	1	Cậu bé bút chì conan bảy viên ngọc rồng
843	9.143	43073	9	7	Female	9.2	1	0	0	2	3	1	d	Giáo viên	Teacher	Làm thợ	Worker	Labor	40	UnderHi	nội trợ	Unemployed	Labor	35	UnderHi	med	no	NA	1	d	1	1	2	0	a	NA	a	1	borrow	c	a	Tìm số thất lạc Bí quyết học tốt các môn ở trường	yes	b	a	1	55 cách chọn trang phục Kỹ năng sống cho học sinh Bí quyết pha chế
2412	16.27	43074	16	6	Male	9.2	1	0	0	1	2	1	e	công an	Police officer	làm cửa	Worker	Labor	34	UnderHi	làm ruộng	Farmer	Labor	33	UnderHi	med	no	NA	1	a	0	1	2	0	f	truyện tranh	a	1	borrow	a	a	conan - thám tử lừng danh shin - cậu bé bút chì	yes	a	a	1	vua sáng chế doremon conan-thám tử lừng danh
2864	16.323	43074	16	8	Female	9.2	1	0	0	1	2	1	c	Công an	Police officer	Nông dân	Farmer	Labor	45	Hi	Giáo viên	Teacher	Intellectuals	38	Uni	med	no	NA	1	c	1	2	2	0	f	sách nấu ăn	a	1	borrow	b	a	Hy vọng từ những truyện không thành Học ăn học nói học gói học mở	yes	a	a	1	Phương pháp học tiếng anh Tức nước vỡ bờ Phương pháp học toán giỏi
805	14.26	43071	14	6	Female	9.1	1	0	0	1	2	1	b	Cảnh sát	Police officer	Công an	Police officer	Labor	40	PostGrad	Giáo viên	Teacher	Intellectuals	37	PostGrad	rich	no	NA	1	a	0	2	3	1	a	NA	a	1	buy	b	b	Htạ giống tâm hồn Tình chị em	yes	a	a	1	Conan Sherlock Home Văn học trung đại
808	14.29	43071	14	6	Female	9.1	1	0	0	1	2	1	b	Giáo viên	Teacher	Công nhân	Worker	Labor	32	UnderHi	g	NA	Labor	30	PostGrad	med	no	NA	1	a	0	2	2	0	a	NA	a	1	borrow	d	d	Học cách hoán cảnh bản thân Những cách thông minh để trở nên thông minh hơn	yes	a	a	1	Tiểu thuyết không gia đình Buratino Conan
2440	16.32	43074	16	6	Female	9.1	1	0	0	3	3	1	b	giáo viên	Teacher	làm ruộng	Farmer	Labor	45	UnderHi	làm ruộng	Farmer	Labor	45	UnderHi	med	no	NA	1	a	0	2	2	1	a	NA	a	1	borrow	a	b	học cách học tập hạt giống tâm hồn	yes	b	a	1	hạt giống tâm hồn tập 3 thám tử lừng danh conan ông già và biển cả
3249	16.503	43074	16	9	Male	9.1	1	0	0	2	2	1	b	công an	Police officer	nông dân	Farmer	Labor	37	Hi	nông dân	Farmer	Labor	39	Hi	med	yes	NA	1	b	1	2	2	0	a	NA	a	1	borrow	a	a	cách phòng chống tai nạn khi đi rừng thúy kiều	no	NA	a	1	kĩ năng chơi bóng rổ kĩ năng bơi lội quy tắc đánh cờ vua
3839	3.19	43071	6	7	Female	9.1	1	0	0	4	4	0	b	Ca sĩ	Singer	Nông dân	Farmer	Labor	NA	UnderHi	Nông dân	Farmer	Labor	NA	UnderHi	med	no	NA	1	b	1	1	1	0	f	Truyện tranh	a	1	buy	a	a	Doraemon Conan	yes	d	a	1	Kĩ năng sống Khám phá thiên nhiên Bông sen xanh
3984	16.195	43074	16	7	Female	9.1	1	0	0	1	1	1	c	nhà báo	Journalist	giáo viên	Teacher	Intellectuals	39	Uni	giáo viên	Teacher	Intellectuals	38	Uni	med	yes	12000000	1	b	1	1	1	0	d	NA	a	1	borrow	a	a	thám tử lừng danh conan doraemon	yes	b	a	1	siêu trộm kid thám tử lừng danh conan sách song ngữ anh - việt
299	4.18	43075	2	7	Female	9	1	0	0	2	2	1	d	Cô giáo	Teacher	Làm ruộng	Farmer	Labor	41	UnderHi	Làm ruộng	Farmer	Labor	41	UnderHi	med	yes	NA	1	b	1	1	1	0	b	NA	a	1	borrow	a	c	Conan Doraemon	yes	b	a	1	100 truyện cổ Việt Nam Sách danh nhân thế giới Doraemon
305	4.186	43075	2	7	Female	9	1	0	0	1	2	1	b	Cô giáo	Teacher	Làm ruộng	Farmer	Labor	39	UnderHi	Làm ruộng	Farmer	Labor	36	UnderHi	med	yes	NA	1	b	1	1	1	0	a	NA	a	1	buy	a	a	Doraemon Shin - cậu bé bút chì	yes	d	a	1	Danh nhân Việt Nam 100 truyện cổ tích Việt Nam Sách hướng dẫn nấu ăn
326	4.207	43075	2	7	Female	9	1	0	0	1	2	1	b	Giáo viên	Teacher	làm ruộng	Farmer	Labor	35	UnderHi	làm ruộng	Farmer	Labor	34	UnderHi	med	yes	NA	1	a	0	2	2	0	a	NA	a	1	borrow	d	b	Hoa Cẩm Cù ( Quỳ) Trở về	yes	d	a	1	Mị Châu Trọng Thủy Ê đi xơn Những câu nói bất hủ
490	9.005	43073	9	6	Female	9	1	0	0	3	3	1	b	ca sĩ	Singer	làm ruộng	Farmer	Labor	45	UnderHi	Công nhân	Worker	Labor	43	UnderHi	med	no	NA	1	a	0	2	2	1	d	NA	a	1	borrow	a	a	Học để làm gì Quà tặng cuộc sống	yes	b	a	1	Kỹ năng chơi cầu lông THế giới động vật Dế mèn phiêu lưu ký
511	9.036	43073	9	6	Female	9	1	0	0	1	3	1	a	Công an	Police officer	Làm thợ	Worker	Labor	41	UnderHi	Công nhân	Worker	Labor	39	UnderHi	med	no	NA	1	a	0	2	1	1	a	NA	a	1	buy	b	d	Truyền thuyết về trái đào Câu lạc bộ công chúa	yes	b	a	1	Cô nan thám tử Harry Porter Shin cậu bé bút chì
530	9.049	43073	9	6	Female	9	1	0	0	1	2	1	b	bác sĩ	Doctor	Công nhân	Worker	Labor	38	Hi	Công nhân	Worker	Labor	33	Hi	med	no	NA	1	b	1	3	2	0	f	Truyện tranh	a	1	borrow	d	d	Conan Hạt giống tâm hồn	yes	b	a	1	conan candy book Shin cậu bé bút chì
536	9.041	43073	9	6	Male	9	1	0	0	1	2	1	b	Kĩ sư	Engineer	làm ruộng	Farmer	Labor	37	Hi	kinh doanh	Businessman	Labor	35	Hi	rich	yes	NA	1	b	1	2	2	1	a	NA	a	1	borrow	b	b	Truyện Kudo Shinichi Đô rê mon	yes	b	a	1	Siêu đạo chính Kid Seloc Home Harry Porter
537	9.042	43073	9	6	Female	9	1	0	0	1	2	1	b	bác sĩ	Doctor	làm ruộng	Farmer	Labor	38	Uni	Giáo viên	Teacher	Intellectuals	35	Uni	med	no	NA	1	a	0	2	1	1	a	NA	a	1	borrow	b	c	Đô rê mon Gặp bác	yes	a	a	1	Harry Boxter Đô rê mon TRuyện về các thiên tài
683	9.106	43073	9	7	Female	9	1	0	0	1	2	1	a	Công an	Police officer	Công nhân	Worker	Labor	37	Hi	Công nhân	Worker	Labor	37	Hi	med	yes	NA	1	a	0	2	3	1	f	toán học	a	1	borrow	d	d	Kỹ năng sống dành cho học sinh Hạt giống tâm hồn	yes	a	a	1	Khoa học đời sống bí mật từ thiên nhiên vũ trụ Danh tướng Lý thường kiệt
806	14.27	43071	14	6	Female	9	1	0	0	2	3	1	a	Giáo viên	Teacher	Đường dây	Worker	Labor	42	Hi	Làm ruộng	Farmer	Labor	39	Hi	med	no	NA	1	b	1	2	2	1	a	NA	a	1	buy	b	b	Gương đạo đức của người cha Những món quà kỳ diệu	yes	d	a	1	Tuổi thơ dữ dội Văn học tuổi trẻ Truyện tranh
825	9.114	43073	9	7	Female	9	1	0	0	1	3	1	a	Giáo viên	Teacher	làm ruộng	Farmer	Labor	37	Hi	Giáo viên	Teacher	Intellectuals	36	Uni	med	no	NA	1	b	1	2	1	1	a	NA	a	1	borrow	a	a	Sát thát Thuyền trưởng đơn vị	yes	b	a	1	Món quà trung thu TÌnh cha Khát vọng sống
958	11.2	43071	11	6	Male	9	1	0	0	2	3	1	c	Cảnh sát	Police officer	Công nhân	Worker	Labor	38	PostGrad	Công nhân	Worker	Labor	37	PostGrad	med	no	NA	1	NA	1	2	3	0	c	NA	a	1	buy	d	c	Thám tử lừng danh Conan Doraemon	yes	c	a	1	Lịch sử Hùng Vương Học cách làm người Kĩ năng chơi cờ vua
979	14.33	43071	14	6	Male	9	1	0	0	1	2	1	a	Giáo sư	Scientist	Tài xế	Driver	Labor	35	Hi	Nhân viên nhà kho	Employee	Labor	34	Hi	med	no	NA	1	b	1	1	1	0	a	NA	a	1	borrow	a	d	Sách thám hiểm vũ trụ	yes	a	a	1	Thám tử lừng danh Conan Doraemon 7 viên ngọc rồng
981	14.35	43071	14	6	Male	9	1	0	0	1	3	1	b	Công an	Police officer	Tài xế	Driver	Labor	43	Hi	Nội trợ	Unemployed	Labor	37	Hi	med	no	NA	1	a	0	2	1	1	a	NA	a	1	buy	d	c	Không gia đình Tôt-tô-chan Cô bé bên cửa sổ	yes	a	a	1	Cuộc phiêu lưu của Văn Ngan tướng công Quê nội Hướng tới tương lai
990	14.44	43071	14	6	Female	9	1	0	0	1	3	1	d	Giáo viên	Teacher	Nông dân	Farmer	Labor	48	UnderHi	Công nhân	Worker	Labor	42	Uni	med	no	NA	1	a	0	2	2	0	b	NA	a	1	borrow	c	a	Danh nhân Việt Nam thời Tiền Lê Kể chuyện thần đồng	yes	b	a	1	Truyện danh nhân Cuộc sống hồi nhỏ của các thần đồng Thần đồng khoa học
991	14.45	43071	14	6	Female	9	1	0	0	1	2	1	b	Nhà từ thiện	Philanthropist	Bộ đội	Soldier	Labor	44	Uni	Nhân viên bưu điện	Employee	Labor	38	Uni	med	no	NA	1	a	0	2	2	1	NA	NA	a	1	NA	b	a	Những cách thông minh để sống sót nơi hoang dã Cẩm nang phòng tránh đuối nước	yes	a	a	1	Doraemon
1453	7.87	43071	7	6	Female	9	1	0	0	2	2	1	f	Giáo viên	Teacher	Thợ xây	Worker	Labor	42	UnderHi	Phụ hồ	Worker	Labor	42	UnderHi	med	no	NA	1	b	1	2	2	1	e	NA	a	1	buy	d	b	Hướng dẫn nghề Doraemon	yes	a	a	1	NA
1479	7.113	43071	7	7	Female	9	1	0	0	2	2	1	a	Giáo viên	Teacher	Bộ đội	Soldier	Labor	45	Uni	Giáo viên	Teacher	Intellectuals	43	Uni	med	no	NA	1	f	1	2	1	1	d	NA	a	1	buy	d	a	Không gia đình Thằng gù nhà thờ Đức Bà	yes	a	a	1	Chúa tể của những chiếc nhẫn Dế Mèn phiêu lưu kí Tắt đèn
1636	9.257	43073	9	8	Male	9	1	0	0	3	3	1	b	Lái xe	Driver	Làm ruộng	Farmer	Labor	53	UnderHi	Công nhân	Worker	Labor	50	Hi	med	no	NA	1	b	1	2	1	0	a	NA	a	1	borrow	a	b	Những người thầy sử Việt	yes	b	a	1	NA
1728	9.318	43073	9	9	Female	9	1	0	0	1	2	0	d	Bác sĩ	Doctor	Giáo viên	Teacher	Intellectuals	44	Uni	Giáo viên	Teacher	Intellectuals	37	Uni	med	no	NA	1	f	1	1	1	0	a	NA	a	1	gift	a	a	Doraemon Thám tử lừng danh Conan	no	c	a	1	10 vạn câu hỏi Vì Sao Dế Mèn phiêu lưu ký
1921	2.21	43076	4	6	Male	9	1	0	0	1	2	1	c	Giáo viên	Teacher	Giáo viên	Teacher	Intellectuals	39	PostGrad	Giáo viên	Teacher	Intellectuals	39	Uni	rich	yes	10000000	1	a	0	1	1	1	f	Truyện tranh	a	1	buy	a	c	Câu lạc bộ thắp sáng ước mơ Không gia đình	yes	a	a	1	Thế nào và tại sao: Khủng long 10 vạn câu hỏi vì sao Conan
2176	2.102	43076	4	7	Female	9	1	0	0	3	3	1	a	Hướng dẫn viên du lịch	Tour guide	Bộ đội	Soldier	Labor	52	Hi	Nông dân	Farmer	Labor	50	UnderHi	NA	no	NA	1	e	1	2	2	1	e	NA	a	1	borrow	d	b	Kính vạn hoa Tuyển tập Nam Cao	yes	a	a	1	Đại Việt sử kí túp lều của bác Tom Chú bé rắc rối
2180	2.98	43076	4	7	Female	9	1	0	0	3	3	1	d	Giáo viên	Teacher	Nông dân	Farmer	Labor	45	UnderHi	Nông dân	Farmer	Labor	40	UnderHi	med	no	NA	1	b	1	1	1	1	e	NA	a	1	borrow	b	b	Hạt giống tâm hồn Bí quyết giúp teen thành công	yes	a	a	1	Tôi tài giỏi bạn cũng thế Kiếm sống Thời thơ ấu
2187	2.91	43076	4	NA	Female	9	1	0	0	2	2	1	b	Nghệ sĩ đàn piano	Artist	Nông dân	Farmer	Labor	42	UnderHi	Giáo viên	Teacher	Intellectuals	37	Uni	med	yes	NA	1	f	1	1	3	1	a	NA	a	1	borrow	b	d	Trên sa mạc và trong rừng thẳm Bí quyết giúp teen thành công	yes	a	a	1	Tôi tài giỏi bạn cũng thế Cho tôi xin 1 vé đi tuổi thơ 88 bức thư mẹ gửi cho con gái
2190	2.88	43076	4	NA	Female	9	1	0	0	2	2	1	a	Công an	Police officer	Nông dân	Farmer	Labor	45	Hi	Kế toán	Accountant	Intellectuals	45	Uni	med	no	NA	1	e	1	2	2	1	e	NA	a	1	borrow	d	b	Tuyển tập Nam Cao Những đứa trẻ mồ côi	yes	a	a	1	Trên sa mạc và trong rừng thẳm Kiếm sống Thời thơ ấu
2197	2.81	43076	4	7	NA	9	1	0	0	2	2	1	d	Bác sĩ	Doctor	Nông dân	Farmer	Labor	NA	UnderHi	Nông dân	Farmer	Labor	NA	UnderHi	poor	no	NA	1	a	0	2	2	1	c	NA	a	1	borrow	d	b	Những tấm lòng cao cả Thế giới hóa học kỳ thú	yes	a	a	1	Không gia đình Nhật kí trong tù Đại Việt sử kí toàn thư
2342	8.184	43076	8	8	Female	9	1	0	0	1	2	1	d	Bác sĩ	Doctor	Nông dân	Farmer	Labor	NA	UnderHi	Công nhân	Worker	Labor	NA	UnderHi	poor	no	NA	1	f	1	2	1	0	a	NA	a	1	borrow	a	c	Hoang mạc hoang sơ Nanh trắng	yes	b	a	1	Harry Potter Tuổi thơ dữ dội Lịch sử Việt Nam
2350	8.192	43076	8	8	Male	9	1	0	0	2	2	1	a	DJ	DJ	Nông dân	Farmer	Labor	49	Hi	Giáo viên	Teacher	Intellectuals	43	Uni	med	no	NA	1	e	1	1	1	1	c	NA	a	1	borrow	d	a	Bách khoa tri thức khoa học vũ trụ	yes	d	a	1	Harry Potter Doraemon Hướng dẫn sử dụng Pioneer
2384	16.15	43074	16	6	Female	9	1	0	0	1	2	1	d	giáo viên	Teacher	thợ xây	Worker	Labor	35	UnderHi	công nhân	Worker	Labor	34	UnderHi	rich	no	NA	1	a	0	2	1	0	f	kĩ năng sống	a	1	borrow	b	a	Kĩ năng sống dành cho học sinh: biết chấp nhận Kĩ năng sống dành cho học sinh: biết trân trọng	yes	a	a	1	Kĩ năng sống dành cho học sinh: cho và nhận Học cách làm người Sáng ngời gương dũng cảm
2556	8.204	43076	8	8	Male	9	1	0	0	2	2	1	a	Bộ đội	Soldier	Công Nhân	Worker	Labor	42	UnderHi	Nông dân	Farmer	Labor	40	UnderHi	med	no	NA	1	f	1	2	1	1	c	NA	a	1	borrow	c	a	Hóa học lí thú Hoang mạc hoang sơ	yes	a	a	1	Đồi gió hú Cuốn theo chiều gió Tắt đèn
2692	5.111	43075	10	8	Male	9	1	0	0	2	3	1	b	Kỹ sư	Engineer	Nông dân	Farmer	Labor	44	UnderHi	Nông dân	Farmer	Labor	40	UnderHi	med	yes	NA	1	a	0	3	1	0	a	NA	a	1	buy	a	a	15 phút giải trí cùng khoa học Khoa học khám phá	yes	a	a	1	Truyện khoa học Doraemon Truyện văn học
2865	16.325	43074	16	8	Male	9	1	0	0	1	2	1	d	Bác sĩ	Doctor	Nông dân	Farmer	Labor	45	Uni	Giáo viên	Teacher	Intellectuals	39	PostGrad	med	no	NA	1	c	1	2	2	0	a	NA	a	1	borrow	d	d	Học ăn học nói học gói học mở Tuổi thơ dữ dội	yes	b	a	1	Doraemon Dế mèn phiêu lưu kí Tắt đèn
2873	16.333	43074	16	8	Female	9	1	0	0	1	2	1	a	Ca sĩ	Singer	Bộ đội	Soldier	Labor	39	Hi	Giáo viên	Teacher	Intellectuals	39	Hi	med	no	NA	1	b	1	2	2	0	d	NA	a	1	borrow	d	b	Tuổi thơ dữ dội Con đường lá me	yes	b	a	1	Bồ công anh trong gió Con mèo biết bay Tức nước vỡ bờ
3197	15.94	43071	15	7	Female	9	1	0	0	1	2	1	c	Phiên dịch viên	Interpreter	Công an	Police officer	Labor	44	Uni	Công nhân viên chức	Public servant	Labor	34	Hi	med	yes	NA	1	a	0	2	2	NA	f	Ngoại ngữ	a	1	buy	a	a	Chiếc hộp kỳ diệu, Những tấm lòng cao cả	no	a	a	1	Từ điển anh việt, những ngày thơ ấu, búp sen xanh
3202	15.99	43071	15	7	Male	9	1	0	0	4	4	0	c	NA	NA	Nông dân	Farmer	Labor	50	Uni	Nông dân	Farmer	Labor	48	Uni	med	no	NA	1	b	1	1	1	0	a	NA	a	1	borrow	c	d	Conan, harry potter	yes	a	a	1	Truyện kiều tắt đèn, núi lửa nóng hơn cả lửa
3208	15.105	43071	15	7	Female	9	1	0	0	1	3	1	c	tiếp viên hàng không	Flight attendant	Tự do	Freelancer	Labor	38	Hi	Giáo viên	Teacher	Intellectuals	37	Uni	med	yes	NA	1	b	1	1	1	1	f	truyện ngoại ngữ	a	1	buy	b	b	Truyện cười bằng tiếng anh, còn chút gì để nhớ	yes	a	a	1	Harypotter, dế mèn phưu lưu ký, tôi là bêto
3209	15.106	43071	15	7	Female	9	1	0	0	4	4	1	b	Giáo viên	Teacher	Tự do	Freelancer	Labor	48	UnderHi	Tự do	Freelancer	Labor	46	UnderHi	med	yes	NA	1	d	1	2	2	0	a	NA	a	1	borrow	d	a	bảy bước tới mùa hè, tôi thấy hoa vàng trên cỏ xanh	yes	b	a	1	Tôi là beeto, Dế mèn phưu lưu ký, Cho tôi xin một vé đi tuổi thơ
3219	15.116	43071	15	7	Female	9	1	0	0	2	2	1	b	Giáo viên	Teacher	Nông dân	Farmer	Labor	41	UnderHi	Tự do	Freelancer	Labor	36	UnderHi	med	no	NA	1	f	1	1	1	1	a	NA	a	1	borrow	a	b	Tắt đèn, mắt biếc	yes	b	a	1	Tôi thấy hoa vàng trên cỏ xanh, dế mèn phưu lưu ký, chiếc hộp kỳ diệu
3229	15.121	43071	15	7	Female	9	1	0	0	2	4	1	b	Ca sĩ	Singer	Thợ xây	Worker	Labor	44	UnderHi	Nông dân	Farmer	Labor	40	Hi	rich	no	NA	1	b	1	2	3	1	a	NA	a	1	buy	b	d	Chí phèo, tôi thấy hoa vàng trên cỏ xanh	yes	d	a	1	những ngày thơ ấu, dế mèn phưu lưu ký, tắt đèn
3243	16.497	43074	16	9	Female	9	1	0	0	2	3	1	c	giáo viên	Teacher	nông dân	Farmer	Labor	42	UnderHi	nông dân	Farmer	Labor	39	UnderHi	med	no	NA	1	a	0	2	1	1	a	NA	a	1	borrow	d	a	truyện kiều những ngôi sao xa xôi	yes	a	a	1	cuộc đời của pi có chút gì để nhớ gió lạnh đầu mùa
3247	16.501	43074	16	9	Female	9	1	0	0	3	3	1	a	thợ xây	Worker	nông dân	Farmer	Labor	44	UnderHi	nông dân	Farmer	Labor	43	UnderHi	med	no	NA	1	b	1	1	1	0	d	NA	a	1	borrow	a	a	tôi tài giỏi bạn cũng thế học tập và làm theo tấm gương đạo đức hồ chí minh	yes	a	a	1	hạt giống tâm hồn hướng dẫn chơi cầu lông sách về toán học
3687	15.181	43071	15	8	Female	9	1	0	0	1	3	1	e	Bác sĩ	Doctor	Bác sĩ	Doctor	Intellectuals	45	Uni	Công nhân	Worker	Labor	42	Hi	med	no	NA	1	a	0	2	2	0	f	lịch sử	a	1	borrow	b	b	những kỳ quan của thế giới, tôi muốn biết cái gì	yes	d	a	1	khát vọng sống, tắt đèn, học ăn học nói học gói học mở
3722	15.192	43071	15	8	Female	9	1	0	0	3	3	1	NA	Nhà du hành vũ trụ	Astronaut	Nông dân	Farmer	Labor	52	Hi	Nông dân	Farmer	Labor	49	Hi	med	no	NA	1	a	0	1	2	0	a	NA	a	1	borrow	a	d	ba ngày ở nước tí hon, truyện ngắn Nam Cao	yes	c	a	1	Kỳ quan thế giới, anhxtanh, hạt giống tâm hồn
3741	15.199	43071	15	8	Male	9	1	0	0	1	3	1	f	Kĩ sư	Engineer	Kinh doanh	Businessman	Labor	46	Hi	Kinh doanh	Businessman	Labor	36	Hi	med	yes	NA	1	a	0	2	2	1	c	NA	a	1	borrow	c	d	Hướng dẫn kỹ thuật tập luyện môn bóng rổ, ngữ pháp Tiếng Anh	yes	c	a	1	Sherlock home, Truyện Kiều, Nam Cao
3827	3.178	43071	6	7	Female	9	1	0	0	1	3	1	b	Bác sĩ	Doctor	Y Tế trường học	Doctor	Intellectuals	41	PostGrad	Nông dân	Farmer	Labor	36	PostGrad	med	no	NA	1	c	1	1	1	0	f	Kĩ năng sống	a	1	borrow	d	b	Còn chút gì để nhớ Mắt biếc	yes	b	a	1	Kiên trì Đại Việt sử kí Truyện Kiều
3874	16.176	43074	16	7	Female	9	1	0	0	2	2	1	a	bác sĩ	Doctor	bộ đội	Soldier	Labor	47	Uni	giáo viên	Teacher	Intellectuals	NA	Uni	med	no	NA	1	a	0	1	1	0	f	sách nâng cao	a	1	borrow	b	a	ai và ky ở xứ sở những con số tàng hình ươm mầm tài năng toán học	yes	a	a	1	giải phẫu cơ thể nâng cao khả năng ngoại ngữ giới thiệu 1 số máy móc trong y học
4042	10.14	43075	5	7	Male	9	1	0	0	3	3	1	e	bác sĩ	Doctor	nông dân	Farmer	Labor	43	Hi	nông dân	Farmer	Labor	38	Hi	med	no	NA	1	b	1	2	1	0	b	NA	a	1	buy	d	b	tắt đèn ánh sáng khoa học kĩ thuật	NA	a	a	1	doraemon harry potter peter pan
4111	10.189	43075	5	7	Female	9	1	0	0	1	3	1	b	giáo viên	Teacher	nông dân	Farmer	Labor	41	Hi	nông dân	Farmer	Labor	33	UnderHi	poor	no	NA	0	c	1	2	1	0	a	NA	a	1	borrow	d	a	tình nhân ái ngụ ngôn cổ điển phương tây	yes	a	a	1	tấm lòng cao cả thế giới động vật tình cha con
4459	15.29	43071	15	9	Male	9	1	0	0	1	2	0	f	Bác sĩ	Doctor	Giáo viên	Teacher	Intellectuals	42	Uni	Công an	Police officer	Labor	40	Uni	med	no	NA	1	b	1	1	1	0	c	NA	a	1	buy	d	d	Cuộc đời của Pi, đắc nhân tâm	yes	a	a	1	Số đỏ, làng Vũ Đại ngày ấy, Thần thoại Bắc Âu
4728	10.505		5	9	Female	9	1	0	0	4	5	NA	e	kế toán	Accountant	nông dân	Farmer	Labor	50	NA	nông dân	Farmer	Labor	49	NA	poor	NA	2000000	1	c	1	2	2	0	e	NA	a	1	borrow	d	d	để có 1 tâm hồn lịch sử bằng tranh	yes	a	a	1	sông đông êm đềm chiến tranh và hòa bình mùa hoa thuốc phiện cuối cùng
1304	1.133	43077	1	9	Male	8.9	1	0	0	1	2	1	d	Nghệ sĩ hài	Comedian	Công nhân	Worker	Labor	36	UnderHi	Công nhân	Worker	Labor	35	Hi	med	no	NA	1	b	1	1	1	1	c	NA	a	1	borrow	d	c	Toán học và nghệ thuật Hạt giống tâm hồn	yes	d	a	1	Chí Phèo Búp sen xanh Tý Quậy
2351	8.193	43076	8	8	Female	8.9	1	0	0	1	2	1	d	Cầu thủ bóng đá	Footballer	Công Nhân	Worker	Labor	36	UnderHi	Nông dân	Farmer	Labor	35	UnderHi	med	no	NA	1	f	1	1	2	1	a	NA	a	1	borrow	a	c	Robinson Nam Cao	yes	b	a	1	Harry Potter Tắt đèn Không gia đình
2380	16.13	43074	16	6	Female	8.9	1	0	0	2	2	1	d	bác sĩ	Doctor	thợ xây	Worker	Labor	43	UnderHi	thợ may	Worker	Labor	38	UnderHi	rich	yes	3000000	1	a	0	1	1	0	a	NA	a	1	borrow	a	a	Không gia đình Bí mật học đường Candy Book	yes	a	a	1	Thám tử lừng danh Conan Doraemon chú mèo máy đến từ tương lai Shin cậu bé bút chì
2393	16.18	43074	16	6	Female	8.9	1	0	0	2	2	1	b	giáo viên	Teacher	làm nông	Farmer	Labor	41	UnderHi	công nhân	Worker	Labor	40	Hi	med	no	NA	1	a	0	2	2	0	a	NA	a	1	gift	a	b	Không gia đình Những ngày thơ ấu	yes	a	a	1	Chuyện con mèo dạy hải âu bay Cô bé ngồi bên cửa sổ Tên tôi là đỏ
2894	16.341	43074	16	8	Female	8.9	1	0	0	1	3	1	b	Doanh nhân	Businessman	Xây dựng	Worker	Labor	35	Hi	Nông dân	Farmer	Labor	35	UnderHi	med	NA	NA	1	c	1	1	1	1	a	NA	a	1	buy	b	b	Nam Cao Tuổi thơ dữ dội	NA	a	a	1	Conan Shin Truyện tranh
3505	3.107	43071	6	8	Male	8.9	1	0	0	1	2	1	d	Cầu thủ bóng đá	Footballer	Thợ xây	Worker	Labor	36	Hi	Công nhân	Worker	Labor	34	Hi	med	yes	7000000	1	a	0	2	2	1	d	NA	a	1	buy	d	d	Chí Phèo Thế giới tự nhiên	yes	c	a	1	Em có biết Thế giới động vật Tiểu sử Zlatan Ibrahimovic
4072	10.166	43075	5	7	Female	8.9	1	0	0	3	4	1	d	giáo viên	Teacher	nông dân	Farmer	Labor	NA	Hi	công nhân	Worker	Labor	NA	Hi	med	yes	3000000	1	b	1	1	1	0	d	NA	a	1	borrow	c	a	những câu chuyện hay nhât viết cho thiếu nhi tình cha	yes	b	a	1	tình anh em tình cảm gia đình tình mẫu tử
1590	9.176	43073	9	8	Male	8.8	1	0	0	3	3	1	d	Ca sĩ	Singer	Tự do	Freelancer	Labor	47	UnderHi	Tự do	Freelancer	Labor	44	UnderHi	med	no	NA	1	d	1	2	1	0	c	NA	a	1	borrow	c	d	Hoang mạc hoang sợ Thần thoại Hi Lạp	yes	a	a	1	Bách khoa toàn thư Tắt Đèn Trạng Quỳnh
2363	16.01	43074	16	6	Female	8.8	1	0	0	2	2	1	b	Bác sĩ	Doctor	Không xác định	NA	NA	NA	NA	Nông dân	Farmer	Labor	36	Hi	poor	NA	NA	1	a	0	2	2	NA	f	truyện dân gian	a	1	buy	d	b	Hướng dẫn cách tự học 100 bài văn hay	yes	d	a	1	Shin cậu bé bút chì Các hành tinh trên Trái Đất Doremon
2558	8.15	43076	8	7	Female	8.8	1	0	0	2	2	1	b	Giáo viên	Teacher	Đông y	Doctor	Intellectuals	44	Uni	Giáo viên	Teacher	Intellectuals	42	Uni	rich	no	NA	1	f	1	1	2	0	f	Truyện tranh	a	1	borrow	a	a	Kho tàng truyện cổ tích Việt Nam Những tấm lòng cao cả	yes	b	a	1	Không gia đình Nữ thần báo tử Hạt giống tâm hồn
2774	8.108	43076	8	7	Female	8.8	1	0	0	3	4	1	b	NA	NA	Nông dân	Farmer	Labor	42	Hi	Nông dân	Farmer	Labor	40	Hi	med	no	NA	1	a	0	2	2	1	a	NA	a	1	borrow	a	a	Thiên nhiên hoang dã 55 cách để tự tin	yes	d	a	1	NA
2871	16.331	43074	16	8	Female	8.8	1	0	0	2	4	1	d	Công an	Police officer	Xây dựng	Worker	Labor	42	UnderHi	Công nhân	Worker	Labor	40	UnderHi	med	yes	NA	1	c	1	2	2	0	c	NA	a	1	borrow	d	b	Phương pháp phát triển khả năng tư duy sáng tạo Ông lão đáng thương	yes	a	a	1	Bồ công anh bất tử Thiếu nữ toàn phong Doraemon
2872	16.332	43074	16	8	Female	8.8	1	0	0	1	2	1	d	Luật sư	Lawyer	không xác định	NA	NA	NA	NA	Nông dân	Farmer	Labor	NA	UnderHi	med	yes	NA	1	a	0	3	2	NA	c	NA	a	1	borrow	d	b	Phương pháp phát triển khả năng tư duy sáng tạo Khám phá khoa học	yes	a	a	1	Thiếu nữ toàn phong Bồ công anh bất tử Doraemon
3020	8.15	43076	8	6	Female	8.8	1	0	0	1	3	1	d	Bác sĩ	Doctor	Công Nhân	Worker	Labor	37	Hi	Giáo viên	Teacher	Intellectuals	32	Uni	med	no	NA	1	a	0	1	2	0	a	NA	a	1	borrow	d	a	Không gia đình Hành trang cuộc sống	yes	b	a	1	Harry Potter Do raemon Za za đã đến lúc lớn khôn
3131	3.18	43071	6	9	Female	8.8	1	0	0	3	3	1	d	Điều dưỡng viên	Nurse	Nông dân	Farmer	Labor	47	Hi	Nông dân	Farmer	Labor	45	UnderHi	med	no	NA	1	d	1	2	2	1	c	NA	a	1	buy	d	a	Địa lý Tư duy tích cực	yes	a	a	1	Cô gái đến từ hôm qua Trước vòng chung kết Chuyện xứ Lang Biang
3238	16.492	43074	16	9	Female	8.8	1	0	0	2	3	NA	b	diễn viên	Actor	nông dân	Farmer	Labor	44	NA	nông dân	Farmer	Labor	42	NA	med	no	NA	1	b	1	2	2	0	a	NA	a	1	buy	a	c	Nhân nghĩa hiếu thảo nhân ái bao dung	yes	d	a	1	sương khói quê nhà con chó nhỏ mang giỏ hoa hồng tôn sư trọng đạo
3834	3.185	43071	6	7	Male	8.8	1	0	0	1	1	1	e	kĩ sư	Engineer	Thợ xây	Worker	Labor	NA	Hi	Nông dân	Farmer	Labor	NA	Hi	med	yes	NA	1	b	1	2	1	1	c	NA	a	1	borrow	a	a	Ánh sáng khoa học kĩ thuật Thuyền Trưởng đơn vị	yes	a	a	1	Dế mèn Đại Việt sử kí truyện Kiều
4164	3.236	43071	6	6	Female	8.8	1	0	0	2	2	1	c	Công an	Police officer	Kĩ sư xây dựng	Engineer	Labor	49	Hi	Giáo viên	Teacher	Intellectuals	45	Uni	med	no	NA	1	a	0	2	2	1	d	NA	a	1	borrow	a	a	Ươm mầm tài năng toán học Học cách học tập	yes	b	a	1	Cậu bé Bút chì Doraemon Từ điển Anh-Việt
4277	10.28		5	8	Female	8.8	1	0	0	2	3	1	b	công an	Police officer	thủy nông	Farmer	Labor	40	NA	công nhân	Worker	Labor	38	UnderHi	med	no	NA	1	d	1	1	2	0	a	NA	a	1	borrow	d	b	trần hoài dương con đường lá me	yes	b	a	1	truyện ngắn ngô tất tố truyện cổ andecxen 1001 đêm
2169	2.109	43076	4	7	Female	8.75	1	0	0	1	2	1	c	Hướng dẫn viên du lịch	Tour guide	Lái xe	Driver	Labor	38	Hi	Công nhân	Worker	Labor	34	Hi	med	no	NA	0	b	1	2	2	1	f	Du lịch	a	1	borrow	d	a	Không gian Hàn Quốc thiên đường của ẩm thực	yes	a	a	1	Đại Việt sử kí toàn thư 1 triệu câu hỏi vì sao về địa lý Cô gái đến từ hôm qua
2174	2.104	43076	2	7	Female	8.75	1	0	0	3	3	1	d	Bác sĩ	Doctor	NA	NA	NA	NA	NA	NA	NA	NA	NA	NA	NA	NA	NA	NA	b	1	2	1	1	a	NA	a	1	borrow	NA	a	Chú chó nhỏ trong giỏ hoa hồng Cuộc phiêu lưu của những người thích đếm	yes	a	a	1	Khát vọng nhìn xa Nhà giả kim Ngồi khóc trên cây
3217	15.114	43071	15	7	Female	8.75	1	0	0	4	4	1	b	doanh nhân	Businessman	Nông dân	Farmer	Labor	51	Hi	Nông dân	Farmer	Labor	47	Hi	med	NA	NA	1	b	1	2	1	1	a	NA	a	1	borrow	d	a	Nguyễn nhật ánh, tôi thấy hoa vàng trên cỏ xanh	yes	NA	a	1	Truyện Kiều, Lão hạc, Dế mèn phưu lưu ký
4109	10.187	43075	5	7	Female	8.75	1	0	0	2	3	1	d	đầu bếp	Chef	nông dân	Farmer	Labor	46	Hi	công nhân	Worker	Labor	36	UnderHi	med	no	NA	1	b	1	1	1	0	f	dạy nấu ăn	a	1	buy	c	b	dạy làm bánh dạy làm món ăn	no	NA	a	1	tấm cám nàng bạch tuyết và 7 chú lùn thạch sanh
4468	15.299	43071	15	9	Female	8.75	1	0	0	3	4	1	b	Hướng dẫn viên du lịch	Tour guide	Nông dân	Farmer	Labor	46	UnderHi	Nông dân	Farmer	Labor	45	Hi	med	no	NA	1	a	0	2	2	0	a	NA	a	1	borrow	a	b	Ngô tất tố, cho tôi xin một vé đi tuổi thơ	yes	b	a	1	tôi là bê tô, bồ câu đưa thư, hạ đỏ
890	11.84	43071	2	7	Male	8.7	1	0	0	1	0	1	d	Nhà Khoa học	Scientist	Thợ xây	Worker	Labor	38	Hi	Công nhân	Worker	Labor	37	Hi	med	no	NA	1	f	1	2	1	0	c	NA	a	1	buy	d	b	Kể chuyện thần đồng Những tấm lòng cao cả	yes	a	a	1	Doraemon Thám tử lừng danh Conan Batman
1016	14.89	43071	14	7	Female	8.7	1	0	0	3	4	1	b	Công an	Police officer	Nông dân	Farmer	Labor	44	UnderHi	Nông dân	Farmer	Labor	40	UnderHi	med	no	NA	1	a	0	2	1	0	a	NA	a	1	borrow	a	a	Truyện ngắn Nguyễn Công Hoan Chiếc lá thuộc bài	yes	a	a	1	Thiên tài Học để làm gì Vũ Tú Nam
1577	9.193	43073	9	8	Male	8.7	1	0	0	2	2	1	d	Bác sĩ	Doctor	Sửa xe máy	Worker	Labor	43	UnderHi	Giáo viên	Teacher	Intellectuals	41	Uni	rich	no	NA	1	e	1	2	2	1	a	NA	a	1	borrow	c	d	Đắc nhân tâm What?Tôi muốn biết cái gì?	yes	a	a	1	Why? Tôi muốn biết vì sao? Tiếng gọi nơi hoang dã 2 vạn dặm dưới biển
2880	16.336	43074	16	8	Male	8.7	1	0	0	1	3	1	d	Bác sĩ	Doctor	Giáo viên	Teacher	Intellectuals	45	Uni	Giáo viên	Teacher	Intellectuals	38	Uni	med	no	NA	1	b	1	2	3	0	a	NA	a	1	borrow	d	a	Rô bin sơn Cru xô Tuổi thơ dữ dội	yes	c	a	1	Những tấm lòng cao cả Đất rừng phương nam Tam quốc chí
2895	16.342	43074	16	8	Female	8.7	1	0	0	1	3	1	a	Diễn viên	Actor	Xây dựng	Worker	Labor	35	UnderHi	Xây dựng	Worker	Labor	33	UnderHi	med	no	NA	1	b	1	1	1	0	f	Truyện tranh	a	1	buy	d	d	Hi vọng từ những chuyện không thành Hạt giống tâm hồn	yes	a	a	1	Tắt đèn Văn học nguyễn Trãi Conan
2899	16.346	43074	16	8	Female	8.7	1	0	0	2	3	1	d	Bác sĩ	Doctor	Xây dựng	Worker	Labor	39	UnderHi	Nông dân	Farmer	Labor	36	UnderHi	med	no	NA	1	b	1	1	1	0	c	NA	a	1	buy	d	a	Tuổi thơ dữ dội Học ăn học nói học gói học mở	yes	a	a	1	Tắt đèn Văn học Nguyễn Trãi Harry Potter
2905	16.351	43074	16	8	Female	8.7	1	0	0	1	2	1	b	Ngoại giao	Diplomat	Xây dựng	Worker	Labor	48	Hi	Nông dân	Farmer	Labor	38	Hi	med	NA	NA	1	a	0	2	1	0	f	Truyện tranh	a	1	buy	b	a	Tuổi thơ dữ dội Học ăn học nói học gói học mở	yes	a	a	1	Shin Bồ công anh bất tử Thế giới động vật
3981	16.192	43074	16	7	Female	8.7	1	0	0	2	2	1	d	bác sĩ	Doctor	giáo viên	Teacher	Intellectuals	45	Uni	giáo viên	Teacher	Intellectuals	41	Uni	rich	yes	NA	1	b	1	3	3	0	c	NA	a	1	buy	a	a	khoa học lý thú - động vật, thực vật khoa học lý thú - bí ẩn cơ thể người	yes	b	a	1	thế giới động vật khoa học lý thú - khoa học đời sống khoa học lý thú - tự nhiên vũ trụ
4081	3.204	43071	6	7	Female	8.7	1	0	0	2	2	1	b	Nhà thơ	Poet	NA	NA	NA	NA	NA	Nông dân	Farmer	Labor	52	UnderHi	poor	NA	NA	1	c	1	1	1	1	a	NA	a	1	borrow	b	a	Hạt giống tâm hồn 10 điều tạo nên số phận	yes	c	a	1	Hạt giống tâm hồn Búp sen xanh Tình cha
4171	3.243	43071	6	6	Male	8.7	1	0	0	1	2	1	b	Cầu thủ bóng đá	Footballer	Nông dân	Farmer	Labor	45	Hi	Công nhân	Worker	Labor	NA	UnderHi	poor	no	NA	NA	a	0	2	2	0	f	Truyện tranh	a	1	borrow	d	a	Văn học Conan	yes	c	a	1	Quà tặng cuộc sống Chuyện xưa kể lại Thần đồng đất Việt
1012	14.85	43071	14	7	Female	8.6	1	0	0	3	3	1	b	Giáo viên	Teacher	Nông dân	Farmer	Labor	42	UnderHi	Nông dân	Farmer	Labor	40	Hi	med	no	NA	1	a	0	2	2	1	a	NA	a	1	buy	a	b	Vượt lên số phận Thám tử lừng danh Conan	yes	b	a	1	Sổ tay nhân vật lịch sử Chiếc lá thuộc bài Hạt giống tâm hồn
1213	1.18	43077	1	6	Female	8.6	1	0	0	1	3	1	d	Phi hành gia	Astronaut	Thợ hàn	Worker	Labor	32	UnderHi	Nông dân	Farmer	Labor	31	UnderHi	rich	no	NA	1	a	0	2	2	1	f	Thế giới	a	1	buy	b	b	Người níu giữ ước mơ Cách làm phi hành gia	yes	c	a	1	Thám tử lừng danh Conan Hướng dẫn học văn hay Chú mèo nghịch ngợm
1313	1.142	43077	1	9	Female	8.6	1	0	0	2	2	1	b	Công an	Police officer	Công nhân	Worker	Labor	41	Hi	Công nhân	Worker	Labor	40	Hi	poor	no	NA	1	f	1	2	2	1	a	NA	a	1	borrow	c	a	Hạt giống tâm hồn Toán học và nghệ thuật	yes	d	a	1	Cô gái đến từ hôm qua Chạm tới giấc mơ Harry Potter
2065	2.182	43076	4	8	Female	8.6	1	0	0	1	2	1	a	Bác sĩ	Doctor	Công Nhân	Worker	Labor	47	Hi	Giáo viên mầm non	Teacher	Intellectuals	37	Uni	med	no	NA	1	a	0	1	2	0	a	NA	a	1	gift	a	b	Cho tôi xin một vé đi tuổi thơ Chú chó nhỏ mang giỏ hoa hồng	yes	a	a	1	Cô gái đến từ hôm qua Hoa hồng xứ khác Lá nằm trong lá
2396	16.19	43074	16	6	Female	8.6	1	0	0	2	2	1	b	giáo viên	Teacher	làm nông	Farmer	Labor	39	UnderHi	làm nông	Farmer	Labor	NA	UnderHi	med	no	NA	0	f	1	1	1	NA	a	NA	a	1	borrow	c	a	Kĩ năng sống dành cho học sinh Sáng ngời gương hiếu học	yes	a	a	1	Ô long viện Những nhân vật lịch sử nổi tiếng Những địa danh nổi tiếng
2772	8.106	43076	8	7	Female	8.6	1	0	0	3	3	1	d	Công an	Police officer	Nông dân	Farmer	Labor	46	UnderHi	Nông dân	Farmer	Labor	44	UnderHi	med	no	NA	1	e	1	3	3	1	c	NA	a	1	borrow	a	d	55 điều để tự tin Búp sen xanh	yes	d	a	1	Búp sen xanh Doraemon Thế giới quanh em
3494	3.96	43071	6	8	Female	8.6	1	0	0	2	2	1	c	Hướng dẫn viên du lịch	Tour guide	Nông dân	Farmer	Labor	38	UnderHi	công ty	Businessman	Labor	40	UnderHi	med	no	NA	0	d	1	2	3	0	f	Ngoại ngữ	a	1	borrow	b	b	Hạt giống tâm hồn Hoàng tử bé	yes	a	a	1	Từ điển Anh-Việt Những phát minh quan trọng trong khoa học Dạy những cách phát âm cơ bản cho người mới học tiếng Hàn
3823	3.174	43071	6	7	Female	8.6	1	0	0	2	2	1	c	Giáo viên	Teacher	Bác sĩ	Doctor	Intellectuals	NA	Hi	Giáo viên	Teacher	Intellectuals	NA	Uni	med	no	NA	1	b	1	1	1	0	a	NA	a	1	borrow	b	d	Còn chút gì để nhớ Mắt biếc	yes	b	a	1	Cô gái đến từ hôm qua Tôi thấy hoa vàng trên cỏ xanh Chúc một ngày tốt lành
4045	10.141	43075	5	7	Female	8.6	1	0	0	1	2	NA	c	nhà thiết kế thời trang	Fashion designer	công nhân	Worker	Labor	39	NA	công nhân	Worker	Labor	35	NA	rich	yes	15000000	1	b	1	1	1	1	d	NA	a	1	borrow	d	d	những tấm lòng cao cả 55 cách để chon trang phục	yes	a	a	1	thạch sanh tình cha nụ hôn tạm biệt
4145	3.217	43071	6	7	Female	8.6	1	0	0	2	2	1	e	Công an	Police officer	Nông dân	Farmer	Labor	46	UnderHi	Nông dân	Farmer	Labor	45	UnderHi	med	no	NA	1	a	0	2	1	0	a	NA	a	1	borrow	a	a	Những quyển truyện nói về lịch sử Tình cha	yes	a	a	1	Conan Cậu bé rồng Thầy giáo của tôi
4173	3.246	43071	6	6	Male	8.6	1	0	0	1	2	1	a	Giáo sư	Scientist	Thợ xây	Worker	Labor	40	UnderHi	Thợ may	Worker	Labor	40	UnderHi	med	yes	10000000	1	b	1	1	NA	1	f	thiên văn học	a	1	buy	d	a	Thiên văn học Kĩ năng học toán	yes	b	a	1	Kĩ năng sinh tồn Thần đồng đất Việt Lớp học bồ câu
4929	7.326	43071	7	9	Female	8.6	1	0	0	2	4	0	NA	Nhân viên văn phòng	Employee	Nông dân	Farmer	Labor	46	Hi	Nông dân	Farmer	Labor	43	Hi	med	no	NA	1	f	1	1	1	0	f	Truyện tranh	a	1	buy	a	d	Hạt giống tâm hồn Chạm tới giấc mơ	yes	b	a	1	Cô gái đến từ hôm qua Conan Tuổi thơ dữ dội
170	153	43073	3	8	Female	8.5	1	0	0	1	2	1	a	Công nhân	Worker	Làm ruộng	Farmer	Labor	43	UnderHi	Công nhân	Worker	Labor	37	UnderHi	med	no	NA	1	a	0	1	1	0	a	NA	a	1	borrow	b	a	Doraemon Tí quậy	yes	a	a	1	Tý quậy Cừu vui vẻ và sói xám Thần đồng đất Việt
509	9.038	43073	9	6	Female	8.5	1	0	0	2	2	1	a	Bác sĩ	Doctor	Công nhân	Worker	Labor	44	UnderHi	Công nhân	Worker	Labor	43	UnderHi	med	no	NA	1	a	0	2	2	0	e	NA	a	1	buy	b	b	NA	yes	d	a	1	NA
517	9.035	43073	9	6	Male	8.5	1	0	0	2	2	1	b	Bác sĩ	Doctor	Công nhân	Worker	Labor	45	Hi	Giáo viên	Teacher	Intellectuals	44	Uni	med	yes	NA	1	a	0	2	1	0	a	NA	a	1	buy	b	d	Hạt giống tâm hồn Văn học tuổi trẻ	yes	b	a	1	Harry Porter Shin cậu bé bút chì Sherlock Homes
523	9.056	43073	9	6	Female	8.5	1	0	0	2	3	1	c	diễn viên	Actor	Làm thợ	Worker	Labor	44	Hi	nội trợ	Unemployed	Labor	40	Hi	med	no	NA	1	b	1	1	2	0	d	NA	a	1	buy	NA	d	Hạt giống tâm hồn Kỹ năng chơi bóng rổ	yes	c	a	1	Selac Home Chuyện Ma Harry Porter
524	9.061	43073	9	6	Female	8.5	1	0	0	3	3	1	c	diễn viên	Actor	Công nhân	Worker	Labor	40	Hi	Công nhân	Worker	Labor	39	Hi	med	no	NA	1	b	1	2	1	0	a	NA	a	1	buy	b	d	Hạt giống tâm hồn Truyền thuyết về trái đào	yes	b	a	1	Shin cậu bé bút chì Đô rê mon Conan Thám tử
533	9.043	43073	9	6	Female	8.5	1	0	0	3	4	1	f	Họa sĩ	Painter	Công nhân	Worker	Labor	43	Hi	Công nhân	Worker	Labor	38	Hi	med	no	NA	1	a	0	1	1	0	a	NA	a	1	buy	b	a	Đô rê mon Co nan	yes	b	a	1	Harry Porter Đô rê mon Cô nan
785	14.06	43071	14	6	Male	8.5	1	0	0	1	4	1	d	Bảo vệ	Guard	Bảo vệ	Guard	Labor	45	UnderHi	May	Tailor	Labor	32	UnderHi	med	yes	8000000	1	b	1	1	1	0	d	NA	a	1	buy	d	c	Văn học Doraemon	no	a	a	1	Khoa học tự nhiên Conan
800	14.21	43071	14	6	Female	8.5	1	0	0	1	2	1	c	Nhà thiết kế thời trang	Fashion designer	Công nhân	Worker	Labor	38	Uni	Y tá	Nurse	Intellectuals	38	Uni	med	no	NA	1	b	1	1	1	0	a	NA	a	1	buy	d	a	Buratino 360 động từ bất quy tắc	yes	d	a	1	Totto-Chan 360 động từ bất quy tắc
809	14.3	43071	14	6	Female	8.5	1	0	0	3	3	1	e	Giáo viên	Teacher	Làm đá mỹ nghệ	Worker	Labor	46	Hi	Công ty giầy da	Businessman	Labor	42	Hi	med	no	NA	1	a	0	2	1	1	a	NA	a	1	borrow	a	b	Tuổi thơ dữ dội Totto-Chan	yes	a	a	1	Conan Doraemon Tuổi thơ dữ dội
982	14.36	43071	14	6	Female	8.5	1	0	0	2	3	1	b	Bác sĩ	Doctor	Công an	Police officer	Labor	45	Uni	Công an	Police officer	Labor	40	Uni	med	no	NA	1	c	1	1	1	0	a	NA	a	1	borrow	b	c	Tôt-tô-chan Cô bé bên cửa sổ Nguyễn Ái Quốc - Hồ Chí Minh	yes	a	a	1	Câu lạc bộ thắp sáng ước mơ Xao xuyến tuổi học trò Tình chi em
987	14.41	43071	14	6	Female	8.5	1	0	0	3	3	1	e	Giáo viên	Teacher	Công nhân	Worker	Labor	38	Hi	Công nhân	Worker	Labor	37	Hi	rich	no	NA	1	a	0	2	1	1	a	NA	a	1	borrow	d	a	Hạt giống tâm hồn Truyện Trạng Nguyên Việt Nam	yes	a	a	1	Truyện dân gian Việt Nam Truyện cổ tích thế giới Tuổi thơ dữ dội
993	14.47	43071	14	6	Female	8.5	1	0	0	1	3	1	c	Giáo viên	Teacher	Nông dân	Farmer	Labor	45	Hi	Nông dân	Farmer	Labor	42	Hi	rich	no	NA	1	b	1	1	1	1	a	NA	a	1	borrow	a	d	Tôt-tô-chan Cô bé bên cửa sổ Cổ tích Việt Nam	yes	a	a	1	Xao xuyến tuổi học trò Câu lạc bộ thắp sáng ước mơ
994	14.48	43071	14	6	Female	8.5	1	0	0	2	2	1	a	Nhà văn	Writer	Tiểu thương	Businessman	Labor	45	Hi	Giáo viên	Teacher	Intellectuals	42	Hi	rich	no	NA	1	b	1	2	3	0	d	NA	a	1	borrow	b	c	Cậu bé bút chì Tý Quậy	yes	c	a	1	Truyện lạ Thần đồng Tôt-tô-chan
1056	14.9	43071	14	8	Male	8.5	1	0	0	1	1	1	b	Giáo viên	Teacher	Thợ điện	Engineer	Labor	44	UnderHi	Nội trợ	Unemployed	Labor	41	UnderHi	med	no	NA	1	a	0	1	3	0	a	NA	a	1	borrow	a	d	Không gia đình Quà tặng cuộc sống - Món quà tinh thần ý nghĩa nhất	yes	a	a	1	Tắt đèn Sông nước Cà Mau Tam quốc diễn nghĩa
1117	14.151	43071	14	9	Female	8.5	1	0	0	1	4	1	b	Giáo viên	Teacher	Tài xế	Driver	Labor	35	Hi	Tự do	Freelancer	Labor	33	UnderHi	med	no	NA	1	b	1	3	2	0	f	Tiểu thuyết	a	1	borrow	a	a	Mắt biếc Không gia đình	yes	d	a	1	Truyện Kiều Bản án chế độ thực dân Pháp Hạt giống tâm hồn
1240	1.101	43077	1	8	Male	8.5	1	0	0	2	2	1	d	Công an	Police officer	Tiểu thương	Businessman	Labor	45	UnderHi	Kế toán	Accountant	Intellectuals	41	Uni	med	no	NA	1	b	1	2	2	0	c	NA	a	1	borrow	d	a	Hóa học lý thú What? Tôi muốn biết	yes	b	a	1	Dế Mèn phiêu lưu kí Bách khoa toàn thư Sinh học kì quái
1462	7.96	43071	7	6	Male	8.5	1	0	0	1	2	1	b	Công nhân	Worker	Thợ xây	Worker	Labor	35	UnderHi	Công nhân	Worker	Labor	35	UnderHi	med	no	NA	1	b	1	2	2	0	b	NA	a	1	buy	a	c	Chuyện dân gian Truyện cổ tích	yes	d	a	1	Truyện cười Truyện cổ tích Chuyện dân gian
1569	9.201	43073	9	8	Male	8.5	1	0	0	2	2	1	d	kinh doanh	Businessman	Bộ đội	Soldier	Labor	43	Hi	Y tế học đường	Nurse	Intellectuals	40	Uni	med	no	NA	1	f	1	2	2	0	b	NA	a	1	borrow	b	d	Napoleon Tuổi thơ dữ dội	yes	a	a	1	Tắt đèn Khoa học khám phá Sinh học trên Trái Đất
1571	9.199	43073	9	8	Female	8.5	1	0	0	1	2	1	b	Bác sĩ	Doctor	Thợ xây	Worker	Labor	42	Hi	Công nhân giày da	Worker	Labor	40	UnderHi	rich	no	NA	1	c	1	2	3	1	a	NA	a	1	borrow	b	d	Truyện ngắn Nam Cao Hạt giống tâm hồn 15 - Luôn là chính mình	yes	a	a	1	Truyện Trạng Quỳnh Kỹ năng tồn tại và thoát hiểm Where
1574	9.196	43073	9	8	Female	8.5	1	0	0	2	3	1	d	Bác sĩ	Doctor	Thợ xây	Worker	Labor	46	UnderHi	Công nhân làm tiền	Worker	Labor	42	UnderHi	med	no	NA	1	b	1	2	2	1	a	NA	a	1	borrow	b	a	Hạt giống tâm hồn Truyện ngắn Nam Cao	yes	a	a	1	Truyện cười dân gian Việt Nam Câu đố vui Những câu nói bất hủ hay nhất
1696	9.27	43073	9	9	Male	8.5	1	0	0	4	4	1	a	Công an	Police officer	làm ruộng	Farmer	Labor	57	Hi	làm ruộng	Farmer	Labor	51	UnderHi	med	no	NA	1	f	1	2	2	0	c	NA	a	1	buy	b	b	Truyện Kiều Hạt giống tâm hồn	yes	c	a	1	Có chút gì để nhớ Khoa học lý thú Truyện Kiều
2021	2.295	43076	4	9	Male	8.5	1	0	0	1	2	1	f	Sản xuất ứng dụng máy tính	Programmer	Cắt tóc	Barber	Labor	42	Hi	Giáo viên	Teacher	Intellectuals	42	Uni	poor	yes	9000000	0	b	1	1	1	0	c	NA	a	1	buy	c	a	Thám tử lừng danh Co nan Do raemon	yes	d	a	1	Thám tử lừng danh Co nan Slell loch homl
2049	2.199	43076	4	8	Female	8.5	1	0	0	2	2	1	d	Bác sĩ	Doctor	Nông dân	Farmer	Labor	49	UnderHi	Nông dân	Farmer	Labor	45	UnderHi	poor	no	NA	1	a	0	2	NA	1	f	Khoa học tự nhiên	a	1	borrow	d	a	Cho tôi xin một vé về tuổi thơ Chú chó nhỏ mang giỏ hoa hồng	yes	d	a	1	tắt đèn Trên sa mạc vè rừng thẳm Harry Potter
2183	2.95	43076	4	7	Male	8.5	1	0	0	2	2	1	c	Giáo viên	Teacher	Nông dân	Farmer	Labor	47	Hi	Nông dân	Farmer	Labor	42	Hi	med	no	NA	1	b	1	1	1	1	a	NA	a	1	buy	a	d	Lão Hạc Chiếc lược ngà	yes	c	a	1	Lão Hạc Chiếc lược ngà Truyện Kiều
2251	8.258	43076	8	9	Male	8.5	1	0	0	2	1	1	a	Bộ đội hải quân	Soldier	Thợ xây	Worker	Labor	43	UnderHi	Công nhân	Worker	Labor	NA	UnderHi	med	no	10000000	1	f	1	1	1	1	e	NA	a	1	borrow	d	d	Ươm mầm tài năng toán học Kĩ năng sống dành cho học sinh	yes	b	a	1	Đời Ánh sáng Hạnh phúc gia đình
2570	8.154	43076	8	7	Male	8.5	1	0	0	1	1	1	a	Bộ đội	Soldier	NA	NA	NA	39	Uni	Công nhân	Worker	Labor	39	Uni	med	NA	NA	1	NA	1	2	1	1	c	NA	a	1	borrow	a	NA	những tấm lòng cao cả tắt đèn	yes	b	a	1	Không gia đình Khám phá thế giới 10 vạn câu hỏi vì sao
2579	8.159	43076	8	7	Female	8.5	1	0	0	1	3	1	a	Phiên dịch	Interpreter	Công Nhân	Worker	Labor	37	Hi	Công nhân	Worker	Labor	36	Hi	med	no	NA	1	NA	1	1	2	0	a	NA	a	1	borrow	d	d	Câu chuyện khoa học Tắt đèn	yes	d	a	1	Cho đi là còn mãi Truyện Kiều Tìm hiểu đất nước Nhật
2581	5.51	43075	10	7	Female	8.5	1	0	0	4	4	1	a	Giáo viên	Teacher	Nông dân	Farmer	Labor	45	NA	Nông dân	Farmer	Labor	35	NA	med	no	NA	1	b	1	1	1	0	a	NA	a	1	borrow	b	c	Doraemon Shin cậu bé bút chì	yes	b	a	1	Quà tặng cuộc sống Tí Quậy Tìm hiểu về Nguyễn Trãi
2610	8.173	43076	8	7	Female	8.5	1	0	0	2	3	1	b	Nhà Báo	Journalist	Nông dân	Farmer	Labor	NA	Hi	Nông dân	Farmer	Labor	NA	UnderHi	med	no	NA	1	NA	1	2	1	0	a	NA	a	1	borrow	d	c	Tắt đèn Tôi thấy hoa vàng trên cỏ xanh	yes	c	a	1	Truyện Kiều Đắc Nhân Tâm Học chơi bóng rổ
2625	8.177	43076	8	7	Female	8.5	1	0	0	1	2	1	b	Kế toán	Accountant	Công Nhân	Worker	Labor	36	Hi	Công nhân	Worker	Labor	36	Hi	med	NA	NA	1	f	1	1	1	0	f	Truyện tranh	a	1	borrow	b	c	Tắt đèn Mắt biếc	yes	d	a	1	Không gia đình Túp lều bác Tom Hạt giống tâm hồn
2946	16.393	43074	16	8	Female	8.5	1	0	0	2	3	1	b	Thiết kế thời trang	Fashion designer	Nông dân	Farmer	Labor	40	Hi	Nông dân	Farmer	Labor	37	Hi	med	NA	NA	1	b	1	2	2	1	d	NA	a	1	buy	d	a	Hạt giống tâm hồn Người thợ đóng giày	yes	b	a	1	Đảo hoang 109 câu đố dân gian hay và độc đáo Cô bé đáng yêu Mialia
2953	16.398	43074	16	8	Male	8.5	1	0	0	3	3	1	b	Kiến trúc sư	Architect	Nông dân	Farmer	Labor	49	UnderHi	Nông dân	Farmer	Labor	50	UnderHi	med	no	NA	1	b	1	1	2	0	a	NA	a	1	buy	d	d	199 bài và đoạn văn hay Học ăn học nói học gói học mở	yes	b	a	1	Danh nhân thế giới Ngữ pháp tiếng Anh thông dụng Chuyện vui vật lý
3048	16.55	43074	16	6	Female	8.5	1	0	0	1	3	1	b	nhà văn	Writer	làm ruộng	Farmer	Labor	35	UnderHi	làm ruộng	Farmer	Labor	32	UnderHi	med	no	NA	1	b	1	2	2	0	a	NA	a	1	borrow	a	a	kĩ năng sống dành cho học sinh chiếc lá thuộc bài	yes	c	a	1	doraemon tý quậy shin cậu bé bút chì
3071	3.02	43071	6	9	Female	8.5	1	0	0	1	3	1	c	Giáo viên	Teacher	Nông dân	Farmer	Labor	42	Hi	Công nhân	Worker	Labor	41	UnderHi	rich	no	NA	1	a	0	2	2	1	f	Hướng nghiệp	a	1	NA	d	a	Bỉ vỏ Còn chút gì để nhớ	yes	a	a	1	Body Language Mắt biếc Tôi thấy hoa vàng trên cỏ xanh
3073	3.03	43071	6	9	Male	8.5	1	0	0	2	2	1	a	Công an	Police officer	Nông dân	Farmer	Labor	52	Hi	Công chức	Public servant	Labor	51	Hi	med	no	NA	1	f	1	2	1	1	f	Đời sống	a	1	buy	a	a	Ông trùm Sách về đời sống	yes	a	a	1	Ngồi khóc trên cây Lá nằm trong lá Chú bé rắc rối
3128	03,15	43071	6	9	Female	8.5	1	0	0	2	2	1	d	Doanh nhân	Businessman	Nông dân	Farmer	Labor	46	UnderHi	Nông dân	Farmer	Labor	44	UnderHi	med	no	NA	1	a	0	3	3	0	a	NA	a	1	borrow	d	d	Hạt giống tâm hồn Tâm sinh lý	yes	a	a	1	Tôi thấy hoa vàng trên cỏ xanh Khám phá khoa học Út Quyên và tôi
3134	3.21	43071	6	9	Male	8.5	1	0	0	3	3	1	a	Giáo viên	Teacher	Nông dân	Farmer	Labor	52	UnderHi	Nông dân	Farmer	Labor	45	Hi	rich	no	NA	1	a	0	2	2	1	c	NA	a	1	borrow	a	a	Nhân ái bao dung Thạch Sanh	yes	a	a	1	Bỉ vỏ Còn chút gì để nhớ Kĩ năng bóng bàn
3141	3.28	43071	6	9	Female	8.5	1	0	0	2	2	1	b	Giáo viên	Teacher	Nông dân	Farmer	Labor	39	UnderHi	Giáo viên	Teacher	Intellectuals	38	Uni	med	no	NA	0	b	1	1	1	0	f	Truyện tranh	a	1	buy	a	d	Shinosuke Conan	yes	a	a	1	Truyện Kiều Cổ tích Conan
3192	15.88	43071	15	7	Male	8.5	1	0	0	2	2	NA	e	công an	Police officer	Công nhân	Worker	Labor	47	Uni	Giáo viên	Teacher	Intellectuals	38	Uni	med	no	NA	1	b	1	1	1	0	c	NA	a	1	buy	a	a	Dế men phưu lưu ký, tắt đèn	yes	d	a	1	Truyện Kiều, tắt đèn, Bút sen xanh
3194	15.91	43071	15	NA	Female	8.5	1	0	0	1	2	1	b	đầu bếp	Chef	Nông dân	Farmer	Labor	37	UnderHi	Nông dân	Farmer	Labor	35	UnderHi	med	no	NA	1	b	1	2	1	1	d	NA	a	1	borrow	d	a	Truyện Kiều, Shin	yes	a	a	1	Nấu ăn 360, Làng Vũ Đại ngày ấy, Hạt giống tâm hồn
3195	15.92	43071	15	7	Female	8.5	1	0	0	1	3	1	b	đầu bếp	Chef	Nông dân	Farmer	Labor	37	UnderHi	Nông dân	Farmer	Labor	31	UnderHi	med	no	NA	1	b	1	1	1	1	f	Dạy nấu ăn	a	1	borrow	b	b	Tắt đèn, kỹ năng sống dành cho học sinh	yes	d	a	1	Truyện Kiều, Làng vũ đại ngày ấy, búp sen xanh
3199	15.96	43071	15	7	Female	8.5	1	0	0	1	2	1	e	Sáng tác truyện tranh	Manga artist	Tự do	Freelancer	Labor	37	Hi	Nông dân	Farmer	Labor	35	Hi	med	NA	NA	1	a	0	2	1	0	f	truyện tranh	a	1	borrow	a	a	Shin, doraemon	yes	d	a	1	Báo nhi đồng, Truyện kiều, những ngày thơ ấu
3211	15.108	43071	15	7	NA	8.5	1	0	0	1	2	1	b	Họa sĩ	Painter	Tự do	Freelancer	Labor	34	UnderHi	Công nhân	Worker	Labor	32	UnderHi	med	no	NA	1	b	1	2	1	1	a	NA	a	1	borrow	a	c	Dế mèn phưu lưu ký, có chút gì để nhớ	yes	a	a	1	Dế mèn phưu lưu kí, truyện kiều, cửa sổ window
3212	15.109	43071	15	NA	Female	8.5	1	0	0	3	3	1	b	NA	NA	Nông dân	Farmer	Labor	47	UnderHi	Nông dân	Farmer	Labor	42	UnderHi	med	no	NA	1	c	1	1	1	0	a	NA	a	1	buy	b	d	hạt giống tâm hồn, tắt đèn	yes	b	a	1	Nhật ký trong tù, Dế men phưu lưu ký, Truyện cổ tích Việt Nam
3214	15.111	43071	15	7	Female	8.5	1	0	0	3	3	1	e	công an	Police officer	Nông dân	Farmer	Labor	53	Hi	Nông dân	Farmer	Labor	53	Hi	med	no	NA	1	f	1	1	1	0	a	NA	a	1	borrow	a	c	Tắt đèn, còn chút gì để nhớ	no	a	a	1	Truyện cổ tích Việt nam, doraemon, shin cậu bé bút chì
3224	15.12	43071	15	7	Male	8.5	1	0	0	2	2	1	f	Công nghệ thông tin	Engineer	Tự do	Freelancer	Labor	51	Hi	Giáo viên	Teacher	Intellectuals	41	Uni	rich	no	NA	1	f	1	1	NA	0	c	NA	a	1	buy	c	a	Số đỏ, chí phèo	yes	b	a	1	tắt đèn, dế mèn phưu lưu ký, hạt giống tâm hồn
3360	16.62	43074	16	6	Female	8.5	1	0	0	1	2	1	c	ca sĩ	Singer	làm ruộng	Farmer	Labor	42	UnderHi	làm ruộng	Farmer	Labor	32	UnderHi	med	no	NA	1	a	0	1	2	0	a	NA	a	1	borrow	a	a	hướng tới tương lai hạt giống tâm hồn	yes	d	a	1	truyện cổ tích conan thám tử lừng danh doraemon chú mèo máy đến từ tương lai
3503	3.105	43071	6	8	Female	8.5	1	0	0	2	3	1	b	Giả Lập viên	Programmer	Giáo viên	Teacher	Intellectuals	47	Uni	Giáo viên	Teacher	Intellectuals	39	Uni	med	yes	NA	1	f	1	2	2	0	a	NA	a	1	buy	d	b	Hạt giống tâm hồn What	yes	c	a	1	Không gia đình Tôi tài giỏi bạn cũng thế Sự hình thành của vũ trụ
3716	15.189	43071	15	8	Male	8.5	1	0	0	2	2	1	e	Nhà khám phá lịch sử	Scientist	Công nhân	Worker	Labor	43	Hi	Công nhân	Worker	Labor	39	Hi	med	no	NA	0	a	0	2	1	0	f	lịch sử	a	1	borrow	b	a	hoang mạc kỳ thú, mỗi ngày ở xứ sở tý hon	yes	d	a	1	Tắt đèn, Truyện Kiều, Đonkihote
3732	15.197	43071	15	8	Female	8.5	1	0	0	1	3	1	c	Nhân viên văn phòng	Employee	Nông dân	Farmer	Labor	35	Hi	Công nhân	Worker	Labor	37	Hi	med	no	NA	0	b	1	2	2	0	a	NA	a	1	borrow	b	a	vượt lên số phận, ngữ pháp tiếng anh	yes	b	a	1	Tắt đèn, truyện Kiều, Những tấm gương hiếu thảo
3752	15.203	43071	15	8	Male	8.5	1	0	0	2	2	1	NA	Tài Chính	Banker	Nông dân	Farmer	Labor	58	Hi	Nông dân	Farmer	Labor	52	Hi	med	no	NA	0	b	1	2	2	0	c	NA	a	1	borrow	b	c	Hoang mạc hoang sơ, Đảo hoang	yes	d	a	1	What? tôi muốn biết cái gì; mỗi ngày nên chọn một niềm vui
3764	15.21	43071	15	8	Female	8.5	1	0	0	3	3	1	d	Ca sĩ	Singer	Nông dân	Farmer	Labor	37	Hi	Nông dân	Farmer	Labor	37	Hi	med	no	NA	1	b	1	2	2	1	d	NA	a	1	borrow	b	a	học ăn học nói học gói học mở, kỹ năng giao tiếp	yes	a	a	1	Cho tôi xin một vé đi tuổi thơ, Tắt đèn, Dế Mèn phưu lưu ký
3768	15.211	43071	15	8	Female	8.5	1	0	0	1	3	1	NA	Diễn viên	Actor	Nông dân	Farmer	Labor	37	Hi	Nông dân	Farmer	Labor	35	Hi	med	no	NA	1	a	0	2	2	0	d	NA	a	1	borrow	b	a	Kỹ năng giao tiếp, Học ăn học nói học gói học mở	yes	a	a	1	How? Tôi muốn biết như thế nào, Cho tôi xin một vé đi tuổi thơ, Dế mèn phưu lưu ký
3818	3.169	43071	6	7	Male	8.5	1	0	0	1	3	1	a	Công an	Police officer	Thợ xây	Worker	Labor	40	UnderHi	Công nhân	Worker	Labor	35	Hi	med	no	NA	1	f	1	1	1	0	f	Tình cảm gia đình	a	1	buy	a	a	Gia đình là số một Tình cảm gia đình	yes	a	a	1	Tình cảm gia đình Gia đình là tất cả Gia đình là số 1
3820	3.171	43071	6	7	Female	8.5	1	0	0	3	3	1	d	Ca sĩ	Singer	Nông dân	Farmer	Labor	45	UnderHi	Làm giày da	Worker	Labor	41	UnderHi	med	no	NA	1	b	1	1	1	0	f	Truyện tranh	a	1	borrow	a	c	Tình bạn bè Dorameon	yes	a	a	1	Tình mẫu tử Tình chị em Truyện Kiều
3822	3.173	43071	6	7	Female	8.5	1	0	0	4	4	1	d	Ca sĩ	Singer	Thợ xây	Worker	Labor	NA	Uni	Nông dân	Farmer	Labor	NA	Uni	med	no	NA	1	b	1	2	1	1	d	NA	a	1	borrow	d	a	Những tấm lòng cao cả Tạp chí thời trang	yes	d	a	1	Lời cảm ơn Tự nhiên và thế giới xung quanh Khám phá tự nhiên
3826	3.177	43071	6	7	Female	8.5	1	0	0	4	4	1	f	Vũ công	Dancer	Thợ xây	Worker	Labor	51	UnderHi	Nông dân	Farmer	Labor	45	UnderHi	med	no	NA	1	b	1	2	1	0	f	Truyện tranh	a	1	buy	a	b	1 triệu câu hỏi vì ao Conan	yes	d	a	1	Cây đèn thần của Aladin Nghìn lẻ một đêm Đại Việt sử kí toàn thư
3833	3.184	43071	6	7	Female	8.5	1	0	0	3	3	0	NA	Luật sư	Lawyer	Công Nhân	Worker	Labor	45	Hi	Công nhân	Worker	Labor	42	Hi	med	no	NA	1	b	1	2	2	0	a	NA	a	1	buy	b	a	Núi lửa Ánh sáng khoa học kĩ thuật	yes	a	a	1	Đại Việt sử kí Bình Ngô đại cáo Truyện cười
3835	3.186	43071	6	7	Male	8.5	1	0	0	1	2	1	a	Bác sĩ	Doctor	Thợ xây	Worker	Labor	35	Uni	Công nhân	Worker	Labor	NA	Uni	med	no	NA	1	c	1	1	NA	0	a	NA	a	1	borrow	b	a	Cho đi làm còn mãi một số bài văn hay bổ ích	no	a	a	1	Những câu đố hay Aladin và cây đèn thần Đại Việt sử kí toàn thư
3837	3.188	43071	6	7	Female	8.5	1	0	0	1	2	0	NA	Diễn viên	Actor	Nông dân	Farmer	Labor	37	UnderHi	Công nhân	Worker	Labor	NA	Hi	med	no	NA	1	b	1	2	2	0	e	NA	a	1	borrow	a	c	Sách hướng dẫn nghề Hướng dẫn nấu ăn	yes	d	a	1	Đại Việt sử kí toàn thư Truyện Kiều 1000 câu hỏi vì sao
3866	16.168	43074	16	7	Female	8.5	1	0	0	3	3	1	b	vận động viên	Athlete	nông dân	Farmer	Labor	46	Hi	nông dân	Farmer	Labor	45	UnderHi	med	no	NA	1	d	1	2	1	0	a	NA	a	1	buy	a	a	gia đình còn chút gì để nhớ	yes	b	a	1	hạt giống tâm hồn 1 tình mẫu tử nữ sinh
3875	16.177	43074	16	7	Female	8.5	1	0	0	2	3	1	b	thiết kế	Designer	làm ruộng	Farmer	Labor	45	UnderHi	làm ruộng	Farmer	Labor	37	UnderHi	med	no	NA	1	b	1	1	1	0	a	NA	a	1	borrow	b	a	tắt đèn tô hoài	yes	a	a	1	cho tôi xin một vé đi tuổi thơ tôi thấy hoa vàng trên cỏ xanh con chó nhỏ mang giỏ hoa hồng
3876	16.178	43074	16	7	Male	8.5	1	0	0	3	3	1	b	thạc sĩ	Scientist	nông dân	Farmer	Labor	45	UnderHi	nông dân	Farmer	Labor	43	Hi	med	no	NA	1	b	1	2	3	0	a	NA	a	1	borrow	d	a	tắt đèn mắt biếc	yes	a	a	1	tôi thấy hoa vàng trên cỏ xanh tình yêu bất tận của mẹ những chuyện hay viết cho thiếu nhi
4060	10.154	43075	5	7	Female	8.5	1	0	0	3	3	1	d	giáo viên	Teacher	nông dân	Farmer	Labor	43	Hi	công nhân	Worker	Labor	42	Hi	med	NA	NA	0	a	0	1	2	0	f	truyện thiếu nhi	a	1	borrow	d	d	còn chút gì để nhớ mắt biếc	yes	b	a	1	cô gái đến từ hôm qua tôi thấy hoa vàng trên cỏ xanh bí ẩn tự nhiên vũ trụ
4069	10.163	43075	5	7	Female	8.5	1	0	0	1	0	1	d	giáo viên	Teacher	công nhân	Worker	Labor	NA	NA	công nhân	Worker	Labor	NA	NA	med	no	NA	1	a	0	1	1	0	f	truyện tranh	a	1	borrow	b	a	1 triệu câu hỏi vì sao bí ẩn về cơ thể người	yes	d	a	1	doraemon truyện cổ Grim tấm cám
4175	3.247	43071	6	6	Female	8.5	1	0	0	1	2	1	c	Tiếp viên hàng không	Flight attendant	Giáo viên	Teacher	Intellectuals	41	Uni	Nhân viên thư viện	Employee	Intellectuals	36	Hi	rich	no	NA	1	a	0	2	1	0	a	NA	a	1	borrow	a	a	Tư duy toán học Không gia đình	yes	d	a	1	Kĩ năng sinh tồn cho trẻ em Thần đồng đất Việt Lớp học bồ câu
4276	10.279		5	8	Female	8.5	1	0	0	3	3	1	NA	giáo viên	Teacher	nông dân	Farmer	Labor	48	UnderHi	nông dân	Farmer	Labor	45	UnderHi	med	no	NA	1	b	1	1	2	0	a	NA	a	1	borrow	b	b	túp lều bác tôm trần hải dương	yes	b	a	1	truyện cổ andecxen chiến tranh và hòa bình harry potter
4281	10.284		5	8	Female	8.5	1	0	0	1	4	1	d	bác sĩ	Doctor	nông dân	Farmer	Labor	38	Hi	nông dân	Farmer	Labor	36	UnderHi	med	yes	8000000	1	a	0	3	3	NA	a	NA	a	1	borrow	d	d	túp lều bác tôm hạt giống tâm hồn	yes	a	a	1	3 ngày ở vương quốc tí hon truyện cổ grim truyện ngắn ngô tất tố
4429	15.281	43071	15	9	Female	8.5	1	0	0	1	2	1	c	Giáo viên	Teacher	Nông dân	Farmer	Labor	36	UnderHi	Nông dân	Farmer	Labor	36	UnderHi	med	no	NA	1	a	0	1	1	0	f	Ngoại ngữ	a	1	borrow	d	a	Chạm tới giấc mơ, để nói hay tiếng anh	yes	b	a	1	chạm tới giấc mơ, thời kỳ đồ đá
4471	15.301	43071	15	9	Female	8.5	1	0	0	1	2	1	b	Hướng dẫn viên du lịch	Tour guide	Bác sĩ	Doctor	Intellectuals	49	Uni	Công nhân	Worker	Labor	36	PostGrad	med	no	NA	1	a	0	3	2	0	a	NA	a	1	buy	b	d	Bơ đi mà sống, mình là cá việc của mình là bơi	yes	a	a	1	Đủ xa sẽ cũ đủ lạ sẽ quên, cứ cười thôi mặc kệ đời, mặc kệ đời sống như người Nhật
4476	15.304	43071	15	9	Female	8.5	1	0	0	2	2	NA	b	Cảnh sát	Police officer	Nông dân	Farmer	Labor	52	Hi	Nông dân	Farmer	Labor	48	Hi	poor	no	NA	1	a	0	2	2	1	a	NA	a	1	borrow	b	d	Từng có người yêu tôi như sinh mệnh, mãi mãi là bao xa	yes	b	a	1	những cô gái ồn ào, thôi thì thương nhau nhé, tuyển tập thơ Xuân Diệu
4736	10.513		5	9	Female	8.5	1	0	0	1	3	1	c	ca sĩ	Singer	nông dân	Farmer	Labor	43	NA	nông dân	Farmer	Labor	38	UnderHi	poor	NA	NA	1	b	1	2	1	1	d	NA	a	1	borrow	b	d	những thằng quỷ nhỏ doraemon	yes	a	a	1	sông đông êm đềm doraemon đắc nhân tâm
4770	16.637	43074	16	9	Male	8.5	1	0	0	1	1	1	d	kiến trúc sư	Architect	Không xác định	NA	NA	NA	NA	nông dân	Farmer	Labor	39	UnderHi	poor	no	NA	1	a	0	2	1	1	c	NA	a	1	buy	d	a	tìm hiểu kiến thức khoa học sức khỏe con người	yes	a	a	1	quá trình hình thành vũ trụ cách phòng tránh các bệnh nguy hiểm kĩ năng sống
4774	16.641	43074	16	9	Female	8.5	1	0	0	1	3	1	a	hướng dẫn viên du lịch	Tour guide	thợ xây	Worker	Labor	38	NA	làm ruộng	Farmer	Labor	36	Hi	med	no	NA	1	b	1	1	1	0	d	NA	a	1	buy	d	d	hạt giống tâm hồn những điều tạo nên cuộc sống	yes	b	a	1	cô gái đến từ hôm qua chàng trai năm ấy chạm đến ước mơ
4786	16.656	43074	16	9	Female	8.5	1	0	0	2	3	1	b	diễn viên	Actor	xây dựng	Worker	Labor	36	UnderHi	công nhân	Worker	Labor	35	UnderHi	med	no	NA	1	b	1	2	2	0	a	NA	a	1	buy	a	d	khi con tim rung động hạt giống tâm hồn	yes	a	a	1	đắc nhân tâm đời thay đổi khi chúng ta thay đổi cho tôi xin một vé đi tuổi thơ
4799	10.14	43074	5	6	Female	8.5	1	0	0	1	3	1	b	giáo viên	Teacher	công an	Police officer	Labor	36	UnderHi	giáo viên	Teacher	Intellectuals	36	Uni	med	no	NA	0	c	1	2	2	0	a	NA	a	1	borrow	d	a	lòng mẹ dế mèn phiêu lưu kí	yes	a	a	1	hạt giống tâm hồn túp lều bác tôm chiến tranh và hòa bình
2244	8.251	43076	8	9	Male	8.4	1	0	0	2	2	1	d	Kĩ sư xây dựng	Engineer	Thợ mộc	Worker	Labor	42	NA	Công nhân	Worker	Labor	38	NA	med	no	NA	1	f	1	2	1	0	a	NA	a	1	borrow	d	NA	Truyện thần đồng Conan	yes	c	a	1	Cậu bé bút chì Tý Quậy Doraemon
2400	16.21	43074	16	6	Female	8.4	1	0	0	1	2	1	c	giáo viên dạy tiếng anh	Teacher	NA	NA	NA	NA	NA	công nhân	Worker	Labor	30	UnderHi	rich	NA	NA	1	a	0	3	1	0	d	NA	a	1	borrow	NA	a	Tý quậy Kĩ năng sống dành cho học sinh	yes	a	a	1	Hoa ban đỏ Chim én Cách học tập và rèn luyện
3490	3.92	43071	6	8	Female	8.4	1	0	0	2	2	1	b	Họa sĩ	Painter	Công Nhân	Worker	Labor	36	UnderHi	Công nhân	Worker	Labor	35	UnderHi	med	no	NA	1	a	0	2	1	1	d	NA	a	1	borrow	a	a	Những gương mặt dấn thân vì cộng đồng Hạt giống tâm hồn	no	d	a	1	Dế Mèn Toàn tuổi thơ Nâng cao toán 8
3872	16.174	43074	16	7	Male	8.4	1	0	0	3	3	1	e	sỹ quan quân đội	Soldier	tự do	Freelancer	Labor	43	UnderHi	tự do	Freelancer	Labor	40	UnderHi	med	no	NA	1	a	0	2	3	0	c	NA	a	1	borrow	d	c	hướng tới tương lai 100 phát minh làm nên lịch sử	yes	b	a	1	10 vạn câu hỏi vì sao thời kì đồ đá người hy lạp huyền thoại
4532	15.311	43071	15	9	Female	8.4	1	0	0	2	2	1	b	Bác sĩ	Doctor	Nông dân	Farmer	Labor	43	UnderHi	Công nhân	Worker	Labor	41	UnderHi	med	no	NA	1	f	1	1	1	1	f	truyện tranh	a	1	borrow	a	c	kỹ năng sống biết lựa chọn, bụi phấn	yes	b	a	1	kỹ năng sống cách biết ơn, tâm sự tuổi mới lớn, khéo tay
4688	10.476	43074	5	9	Female	8.4	1	0	0	2	3	1	b	giáo viên	Teacher	tài xế	Driver	Labor	39	UnderHi	nông dân	Farmer	Labor	39	UnderHi	med	NA	NA	1	a	0	3	2	1	b	NA	a	1	borrow	a	a	thi nhân việt nam những câu chuyện học làm người tôn sư trọng đạo	NA	NA	a	1	ánh trăng tấm cám vợ nhặt
4924	7.321	43071	7	9	Female	8.325	1	0	0	3	3	1	b	Kế toán	Accountant	Nông dân	Farmer	Labor	45	UnderHi	Nông dân	Farmer	Labor	44	UnderHi	med	no	NA	1	a	0	1	1	0	f	Tiểu thuyết	a	1	buy	b	d	Nghìn lẻ một đêm Cửa sổ tâm hồn	yes	c	a	1	Cho tôi xin một vé đi tuổi thơ Tuổi thơ dữ dội Tôi thấy hoa vàng trên cỏ xanh
527	9.051	43073	9	6	Male	8.3	1	0	0	2	2	1	a	bác sĩ	Doctor	kinh doanh	Businessman	Labor	43	Uni	Giáo viên	Teacher	Intellectuals	40	Uni	rich	no	NA	1	b	1	3	2	1	e	NA	a	1	buy	d	a	Kỹ năng sống dành cho học sinh Hạt giống tâm hồn	yes	b	a	1	Harry Porter Seloc Home Đô rê mon
1013	14.86	43071	14	7	Male	8.3	1	0	0	1	1	1	b	Bác sĩ	Doctor	Tự do	Freelancer	Labor	51	Hi	Tự do	Freelancer	Labor	50	Hi	med	no	NA	1	b	1	1	2	1	a	NA	a	1	buy	d	a	Thám tử lừng danh Conan Doraemon	yes	a	a	1	Thiên tài Lịch sử Việt Nam Cánh chim bay
1197	1.02	43077	1	6	Male	8.3	1	0	0	2	2	1	a	Công an	Police officer	Tự do	Freelancer	Labor	46	UnderHi	Không xác định	NA	Labor	NA	NA	poor	no	NA	1	c	1	2	1	0	f	Truyện trinh thám	a	1	borrow	b	b	Thám tử lừng danh Conan Cậu bé bút chì	yes	a	a	1	Thám tử lừng danh Conan Doraemon Asari
1200	1.05	43077	1	6	Male	8.3	1	0	0	1	1	1	a	Giáo viên	Teacher	Bộ đội	Soldier	Labor	41	PostGrad	Giáo viên	Teacher	Intellectuals	41	PostGrad	rich	yes	NA	1	f	1	2	1	1	f	Truyện trinh thám	a	1	buy	a	a	Thám tử lừng danh Conan Sherlock Holmes	yes	b	a	1	NA
1211	1.16	43077	1	6	Female	8.3	1	0	0	2	2	1	d	Khoa học kĩ thuật	Scientist	Kinh doanh	Businessman	Labor	41	UnderHi	Nội trợ	Unemployed	Labor	41	Hi	med	no	NA	1	b	1	2	1	0	c	NA	a	1	gift	d	d	Những câu hỏi kì thú về thiên nhiên quanh ta Ca dao tục ngữ	yes	a	a	1	Ca dao tục ngữ Chạm tới giấc mơ Cậu bé bút chì
2062	2.185	43076	4	8	Male	8.3	1	0	0	3	3	1	d	Phi hành gia	Astronaut	Nông dân	Farmer	Labor	49	Hi	Nông dân	Farmer	Labor	47	Hi	med	no	NA	1	f	1	2	1	1	c	NA	a	1	buy	a	a	Lũ trẻ đường ray Hãy can đảm và tốt bụng	yes	b	a	1	Bí ẩn các thiên thạch xung quanh trái đất 10 vạn câu hỏi vì sao Bí ẩn về người ngoài hành tinh
2166	2.113	43076	4	7	Female	8.3	1	0	0	1	3	1	b	Giáo viên	Teacher	Thợ xây	Worker	Labor	37	Hi	Nông dân	Farmer	Labor	32	UnderHi	med	no	NA	1	a	0	2	2	1	a	NA	a	1	buy	a	a	Quà tặng cuộc sống chiếc hộp kì diệu	yes	a	a	1	Không gia đình các lễ hội truyền thống từ điển
2407	16.24	43074	16	6	Male	8.3	1	0	0	2	2	1	b	cảnh sát	Police officer	làm ruộng	Farmer	Labor	40	NA	làm ruộng	Farmer	Labor	33	UnderHi	med	no	NA	1	b	1	1	1	1	a	NA	a	1	buy	b	b	Doremon Thám tử lừng danh Conan	yes	b	a	1	Thần đèn Conan Shin
2868	16.328	43074	16	8	Female	8.3	1	0	0	1	3	1	d	Luật sư	Lawyer	Xây dựng	Worker	Labor	42	Hi	Kinh doanh	Businessman	Labor	37	Hi	med	no	NA	1	b	1	3	2	0	f	Sách giáo dục	a	1	buy	b	b	Hạt giống tâm hồn Tuổi dậy thì không gì phải sợ	yes	a	a	1	Trà sữa tâm hồn Tạm biệt, em ổn Văn học Ngô tất tố
2877	16.335	43074	16	8	Male	8.3	1	0	0	2	2	1	a	Bác sĩ	Doctor	Xây dựng	Worker	Labor	42	UnderHi	Không xác định	NA	Labor	40	UnderHi	med	yes	NA	1	c	1	2	2	1	a	NA	a	1	buy	NA	NA	Những tâm hồn cao thượng hạt giống tâm hồn	NA	a	a	1	Học cách làm người Bàn có 5 chỗ ngồi Harry Potter
2952	16.397	43074	16	8	Male	8.3	1	0	0	1	2	1	f	Hacker	Hacker	Nông dân	Farmer	Labor	38	Hi	Nông dân	Farmer	Labor	36	Hi	med	no	NA	1	a	0	2	2	0	d	NA	a	1	buy	c	a	Khám phá rừng Vật lí lý thú	yes	a	a	1	Hướng tới tương lai Không gian vũ trụ Máy móc dưới nước
3006	15.61	43071	15	6	Male	8.3	1	0	0	1	2	1	a	công an	Police officer	Công nhân	Worker	Labor	39	Hi	Nông dân	Farmer	Labor	37	Hi	med	no	NA	1	a	0	2	2	1	b	NA	a	1	buy	c	a	cô bé khỏe nhất thế giới, cô bé gan dạ	yes	a	a	1	hàng vạn năm dưới biển,đại dương khó thương, không gia đình
3068	3.01	43071	6	9	Male	8.3	1	0	0	1	2	1	d	Bác sĩ	Doctor	Thợ xây	Worker	Labor	40	PostGrad	Không xác định	NA	Labor	NA	NA	rich	no	NA	1	b	1	2	2	1	b	NA	a	1	buy	d	d	Địa lý lí thú Chìa khóa vàng hóa học	yes	a	a	1	Mắt biếc Harry Potter Ngôn ngữ cơ thể
3476	3.84	43071	6	8	Male	8.3	1	0	0	1	2	1	a	Admin Online Math	Manager	Sửa xe	Worker	Labor	36	UnderHi	Nông dân	Farmer	Labor	36	Hi	NA	no	NA	1	c	1	2	1	1	f	Toán học	a	1	borrow	d	d	Toán nâng cao Truyện cười Dân gian	yes	a	a	1	Không gia đình 10 vạn câu hỏi vì sao Thành ngữ, tục ngữ
3819	3.17	43071	6	7	Male	8.3	1	0	0	3	3	0	a	Giáo viên	Teacher	Nông dân	Farmer	Labor	45	UnderHi	Buôn bán	Seller	Labor	43	UnderHi	med	no	NA	1	b	1	2	1	0	f	Truyện tranh	a	1	borrow	a	NA	Mắt biếc Conan	yes	a	a	1	Conan Doraemon Đại Việt sử kí toàn thư
3928	16.191	43074	16	7	Female	8.3	1	0	0	2	3	1	b	diễn viên	Actor	làm ruộng	Farmer	Labor	42	UnderHi	làm ruộng	Farmer	Labor	38	UnderHi	med	no	NA	0	b	1	1	1	0	d	NA	a	1	borrow	a	a	thám tử lừng danh conan fairy tail	yes	d	a	1	fairy tail one piece 7 viên ngọc rồng siêu cấp
4188	3.26	43071	6	6	Female	8.3	1	0	0	2	2	1	d	Kinh doanh	Businessman	Công Nhân	Worker	Labor	44	Uni	Giáo viên	Teacher	Intellectuals	36	Uni	rich	no	NA	1	b	1	2	2	1	a	NA	a	1	borrow	c	a	Con mèo và chuột bạn của nó Conan	yes	c	a	1	Con mèo dạy hải âu bay Dế mèn Quà tặng cuộc sống
4540	15.318	43071	15	9	Female	8.3	1	0	0	4	4	1	d	Diễn viên	Actor	Nông dân	Farmer	Labor	45	UnderHi	Nông dân	Farmer	Labor	42	UnderHi	med	no	NA	1	f	1	2	2	0	f	truyện tranh	a	1	borrow	a	b	conan, doraemon	yes	b	a	1	Shin, Thần đồng đất việt, ô long viện
4544	15.322	43071	15	9	Female	8.3	1	0	0	1	2	1	b	Giáo viên	Teacher	Nông dân	Farmer	Labor	41	UnderHi	Nông dân	Farmer	Labor	32	UnderHi	med	yes	15000000	1	e	1	2	2	1	f	truyện tranh	a	1	borrow	d	d	doraemon, bụi phấn	yes	b	a	1	doraemon, tâm sự tuổi mới lớn, tiểu thuyết bầu trời sụp đổ
4714	10.491	43074	5	9	Male	8.3	1	0	0	5	5	1	e	không xác định	NA	nông dân	Farmer	Labor	NA	Hi	nông dân	Farmer	Labor	NA	Hi	med	NA	NA	1	a	0	2	1	1	b	NA	a	1	borrow	d	b	thi nhân việt nam đắc nhân tâm	yes	a	a	1	NA
1570	9.2	43073	9	8	Female	8.25	1	0	0	2	2	1	b	Bác sĩ	Doctor	Làm ruộng	Farmer	Labor	43	Hi	Công nhân giày da	Worker	Labor	40	Hi	med	no	NA	1	b	1	2	2	0	b	NA	a	1	borrow	b	d	Kể truyện thần đồng Tuổi thơ dữ dội	yes	a	a	1	Dế mèn phiêu lưu ký Những ngày thơ ấu Tắt Đèn
3138	3.25	43071	6	9	Female	8.25	1	0	0	1	2	1	b	Kinh doanh thời trang	Fashion designer	Thợ xây	Worker	Labor	42	Hi	Giáo viên	Teacher	Intellectuals	35	Uni	med	no	NA	1	a	0	1	2	1	a	NA	a	1	borrow	d	a	Tuổi trẻ đáng giá bao nhiêu 8 tố chất quyết định đến sự thành công của người phụ nữ	yes	a	a	1	Cô gái đến từ hôm qua Tôi thấy hoa vàng trên cỏ xanh Nếu như còn một ngày để sống
3181	3.31	43071	6	NA	Female	8.25	1	0	0	2	3	1	b	Giáo viên	Teacher	Nông dân	Farmer	Labor	44	UnderHi	Công nhân	Worker	Labor	41	UnderHi	med	no	NA	0	b	1	1	1	0	f	Truyện tranh	a	1	buy	a	d	Do raemon Tý Quậy	no	d	a	1	Thám tử lừng danh Co nan Truyện Kiều Truyện Cổ tích
3551	3.114	43071	6	8	Female	8.25	1	0	0	1	2	1	e	Ca sĩ	Singer	NA	NA	NA	NA	NA	Công nhân	Worker	Labor	35	NA	med	no	5000000	1	b	1	1	1	0	a	NA	a	1	buy	a	a	Ngữ pháp tiếng Anh Thiên hà thật đáng ngạc nhiên	yes	a	a	1	Địa lý lí thú Sinh vật lí thú Tuổi thơ dữ dội
4456	15.287	43071	15	9	Female	8.25	1	0	0	1	2	1	b	Nhà báo	Journalist	Bộ đội	Soldier	Labor	40	Uni	Giáo viên	Teacher	Intellectuals	38	Uni	med	no	NA	1	a	0	1	2	0	a	NA	a	1	borrow	b	b	Tam sinh tam thế, hẹn một mai	yes	c	a	1	Trên đường băng, cho tôi xin một vé đi tuổi thơ, cô gái đến từ hôm qua
91	6.127	43073	3	8	Male	8.2	1	0	0	1	2	1	a	Kỹ sư	Engineer	Làm ruộng	Farmer	Labor	44	UnderHi	Làm ruộng	Farmer	Labor	33	UnderHi	med	NA	NA	NA	c	1	2	1	0	a	NA	a	1	buy	d	d	Nobel (truyện tranh chuyển thể) Marie Curie (truyện tranh chuyển thể)	yes	a	a	1	Truyện thơ Hồ Xuân Hương Lịch sử về con người và đất nước Việt Nam Truyện cười dân gian Việt Nam
152	141	43104	3	8	Male	8.2	1	0	0	2	2	1	e	Công an	Police officer	Làm ruộng	Farmer	Labor	40	UnderHi	Làm ruộng	Farmer	Labor	38	UnderHi	med	yes	11000000	1	b	1	2	1	0	f	Địa lý	a	1	buy	d	a	Truyện cười dân gian Việt Nam Truyện về đất nước và lích sử con người Việt Nam	yes	a	a	1	Truyện kiếm hiệp Trân Châu Cảng Marie Curie (truyện tranh chuyển thể)
159	142	43104	3	8	Female	8.2	1	0	0	2	3	1	b	Giáo viên	Teacher	Làm ruộng	Farmer	Labor	41	UnderHi	Làm ruộng	Farmer	Labor	39	UnderHi	med	yes	NA	1	b	1	2	2	1	a	NA	a	1	buy	b	a	Bình giảng văn 8 Thơ Hồ Xuân Hương	yes	b	a	1	Tắt đèn Mười vạn câu hỏi vì sao Ươm mầm ước mơ
669	90.096	43073	9	7	Female	8.2	1	0	0	2	3	1	a	Giáo viên	Teacher	Công nhân	Worker	Labor	42	Hi	Làm ruộng	Farmer	Labor	37	UnderHi	med	no	NA	1	b	1	2	1	0	f	Truyện tranh	a	1	borrow	a	d	Bí ẩn cơ thể con người Hạt giống tâm hồn	yes	a	a	1	Nữ vương khởi nghĩa Danh tướng Lý thường Kiệt Lý triều dựng thành Thang long mở nghiệp
1008	14.81	43071	14	7	Male	8.2	1	0	0	1	1	1	d	Công an	Police officer	Không xác định	NA	NA	NA	NA	Nông dân	Farmer	Labor	43	UnderHi	med	no	NA	1	a	0	2	1	0	c	NA	a	1	borrow	b	b	Thiên tài Những phát minh khoa học	yes	a	a	1	Giai thoại về các nhà khoa học Danh nhân Việt Nam Kĩ năng đánh bóng bàn
1069	14.103	43071	14	8	Male	8.2	1	0	0	1	2	1	e	Cầu thủ	Footballer	Cán bộ cấp xã	Public servant	Intellectuals	42	PostGrad	Kinh doanh	Businessman	Labor	40	Hi	med	yes	15000000	1	b	1	2	2	1	f	Thể thao	a	1	buy	d	a	Tạp chí bóng đá thế giới Doraemon	yes	b	a	1	Tạp chí bóng đá thế giới Thám tử lừng danh Conan Doraemon
1578	9.192	43073	9	8	Female	8.2	1	0	0	2	4	1	b	Giáo viên	Teacher	Làm ruộng	Farmer	Labor	37	UnderHi	Làm ruộng	Farmer	Labor	36	UnderHi	rich	no	NA	1	b	1	2	2	1	a	NA	a	1	borrow	b	a	Khoa học kỳ thú - Hóa học lý thú	yes	a	a	1	Những câu đố vui dân gian Việt Nam Truyện cười văn học Những điều bạn chưa biết
2513	16.41	43074	16	6	Male	8.2	1	0	0	3	3	1	a	kiến trúc sư	Architect	làm ruộng	Farmer	Labor	50	Hi	làm ruộng	Farmer	Labor	49	Hi	med	no	NA	1	e	1	2	1	0	a	NA	a	1	borrow	a	a	những kì tích y học những tấm lòng cao cả	yes	b	a	1	kĩ thuật thuở ban sơ nhà khoa học khám phá thế giới bong bóng bay lên trời
2560	8.152	43076	8	7	Female	8.2	1	0	0	1	2	1	b	Kế toán ngân hàng	Banker	Tài xế	Driver	Labor	39	Hi	Nông dân	Farmer	Labor	39	Hi	NA	no	NA	1	b	1	1	1	0	f	Ngôn tình	a	1	borrow	a	c	Tắt đèn Còn chút gì để nhớ	yes	a	a	1	Không gia đình Khám phá thế giới Hạt giống tâm hồn
2584	8.161	43076	8	7	Male	8.2	1	0	0	2	0	1	e	Công an	Police officer	Bác sĩ	Doctor	Intellectuals	47	Uni	Giáo viên	Teacher	Intellectuals	42	Uni	med	no	NA	1	b	1	1	1	1	f	Truyện tranh	a	1	borrow	d	c	Biểu tượng thất truyền	no	NA	a	1	Hỏa ngục Harry Potter
3023	8.19	43076	8	6	Female	8.2	1	0	0	1	1	1	b	Công an	Police officer	Đã mất	NA	Labor	NA	NA	Công nhân	Worker	Labor	39	UnderHi	med	no	NA	1	f	1	2	1	0	a	NA	a	1	borrow	d	c	Conan Dế Mèn	yes	d	a	1	Miền cực Không gia đình Bí mật học đường
3465	13.55	43073	13	6	Female	8.2	1	0	0	1	1	1	f	bác sĩ	Doctor	công nhân	Worker	Labor	34	NA	công nhân	Worker	Labor	32	UnderHi	NA	no	NA	0	e	1	1	1	0	d	NA	a	1	buy	a	d	tìm hiểu về pháp luật 12 bộ sách hay	no	b	a	1	cách kết bạn an toàn cho bạn sách tâm linh
3873	16.175	43074	16	7	Male	8.2	1	0	0	1	3	1	d	nhà khoa học	Scientist	làm ruộng	Farmer	Labor	42	UnderHi	làm nông	Farmer	Labor	35	Hi	med	no	NA	1	d	1	2	1	1	c	NA	a	1	borrow	d	a	chúng ta đã xuất hiện như thế một triệu câu hỏi vì sao	yes	a	a	1	NA
3920	16.183	43074	16	7	Female	8.2	1	0	0	2	2	1	d	bác sĩ	Doctor	thợ xây	Worker	Labor	40	UnderHi	làm ruộng	Farmer	Labor	35	UnderHi	med	no	NA	1	b	1	2	2	0	a	NA	a	1	borrow	d	a	khoa học lí thú - bí ẩn cơ thể người một triệu câu hỏi vì sao	yes	a	a	1	toán tuổi thơ những bài làm văn mẫu 7 những câu đố hay và bổ ích
3985	16.196	43074	16	7	Female	8.2	1	0	0	1	1	1	b	không xác định	NA	công nhân	Worker	Labor	35	Hi	công nhân	Worker	Labor	34	Hi	med	yes	NA	1	a	0	2	1	1	f	thám tử lừng danh conan	a	1	buy	c	a	thám tử lừng danh conan one piece đảo hải tặc	yes	b	a	1	one piece đảo hải tặc thủy thủ mặt trăng shin cậu bé bút chì
4005	10.108	43074	5	6	Female	8.2	1	0	0	1	2	1	c	giáo viên	Teacher	thợ xây	Worker	Labor	NA	Hi	công nhân	Worker	Labor	NA	Hi	med	no	NA	1	e	1	2	1	1	b	NA	a	1	buy	a	a	bài học vô giá những bài toán dành cho người lớn và trẻ em	yes	c	a	1	sách ngoại ngữ khám phá thế giới triển lãm nghệ thuật
4271	10.275		5	8	Female	8.2	1	0	0	2	2	1	a	hướng dẫn viên	Tour guide	không xác định	NA	NA	42	UnderHi	không xác định	NA	Labor	NA	UnderHi	med	no	NA	1	b	1	1	2	0	a	NA	a	1	borrow	d	a	truyện ngắn nam cao tuổi thơ dữ dội	yes	d	a	1	truyện ngắn ngô tất tố harry potter truyện cổ grim
4424	15.279	43071	15	9	Male	8.2	1	0	0	1	2	1	d	công an	Police officer	Công an	Police officer	Labor	42	PostGrad	Nội trợ	Unemployed	Labor	40	PostGrad	med	yes	NA	1	a	0	2	3	0	c	NA	a	1	borrow	d	a	10 vạn câu hỏi vì sao, who tôi muốn biết là ai	yes	a	a	1	10 vạn câu hỏi vì sao
4762	16.628	43074	16	9	Female	8.2	1	0	0	3	4	1	c	luật sư	Lawyer	nông dân	Farmer	Labor	NA	Hi	nông dân	Farmer	Labor	NA	Hi	med	no	NA	1	a	0	2	2	0	f	kĩ năng sống	a	1	gift	b	a	đắc nhân tâm trên đường băng	yes	a	a	1	chinh phục mục tiêu tôi tài giỏi, bạn cũng thế đọc vị bất kì ai
90	6.126	43073	3	8	Female	8.1	1	0	0	1	2	1	b	Giáo viên	Teacher	Làm ruộng	Farmer	Labor	43	Hi	Làm ruộng	Farmer	Labor	35	UnderHi	med	yes	5000000	1	a	0	2	2	1	a	NA	a	1	borrow	d	a	Dế Mèn phiêu lưu ký Thơ Hồ Xuân Hương	yes	d	a	1	Mười vạn câu hỏi vì sao Thắp sáng ước mơ Thám tử Solochom [sic]
685	9.107	43073	9	7	Female	8.1	1	0	0	1	3	1	b	Công an	Police officer	làm ruộng	Farmer	Labor	41	UnderHi	Làm ruộng	Farmer	Labor	33	Hi	med	no	NA	1	a	0	1	1	NA	a	NA	a	1	buy	a	a	Lịch sử việt nam hạt giống tâm hồn	yes	b	a	1	Dạy trẻ có trí tiến thủ những bài văn hay tình cha
1030	9.132	43073	9	7	Female	8.1	1	0	0	3	3	1	b	Bác sĩ	Doctor	làm ruộng	Farmer	Labor	50	UnderHi	làm thợ	Worker	Labor	51	UnderHi	med	no	NA	1	b	1	2	2	0	e	NA	a	1	borrow	d	a	Gió lạnh đầu mùa Quà tặng cuộc sống	yes	a	a	1	Phòng tránh tai nạn cho trẻ em học sinh 500 câu chuyện đạo đức tình cha Việt nam lịch sử Trần trọng kim
1206	1.11	43077	1	6	Female	8.1	1	0	0	2	3	1	b	Công an	Police officer	Công nhân	Worker	Labor	53	Hi	Giáo viên	Teacher	Intellectuals	42	Uni	rich	no	NA	1	c	1	2	1	1	a	NA	a	1	borrow	d	a	Nâng cao và phát triển toán 6 Những bài văn hay dành cho học sinh giỏi	yes	c	a	1	Những bài văn hay Những tác phẩm văn học Doraemon
1264	1.157	43077	1	9	Female	8.1	1	0	0	3	6	1	d	Công nghệ thông tin	Engineer	Nông dân	Farmer	Labor	44	UnderHi	Nông dân	Farmer	Labor	39	UnderHi	med	no	NA	0	c	1	1	1	1	a	NA	a	1	borrow	d	c	Thám tử lừng danh Conan Hạt giống tâm hồn	yes	b	a	1	Hạt giống tâm hồn Tý Quậy Những truyện trinh thám hay nhất
2056	2.192	43076	4	8	Female	8.1	1	0	0	1	2	1	b	Bác sĩ	Doctor	Nông dân	Farmer	Labor	NA	Hi	Nông dân	Farmer	Labor	40	Hi	med	no	NA	1	a	0	1	1	1	a	NA	a	1	borrow	a	d	Cho tôi xin một vé đi tuổi thơ Hạt giống tâm hồn	yes	b	a	1	Dế mèn phiêu lưu kí Kính vạn hoa Trên sa mạc và rừng thẳm
2134	2.145	43076	4	7	Female	8.1	1	0	0	1	3	1	c	Giáo viên	Teacher	Nông dân	Farmer	Labor	35	UnderHi	Nông dân	Farmer	Labor	NA	UnderHi	med	yes	NA	1	a	0	2	2	0	a	NA	a	1	borrow	a	a	Sách tham khảo ngoại ngữ Bài tập đại số và hình học	yes	a	a	1	Doraemon Lâu đài bí ẩn Lạc vào thế giới biến
2196	2.82	43076	4	7	Female	8.1	1	0	0	2	3	1	b	Bác sĩ	Doctor	Thợ xây	Worker	Labor	43	Uni	Giáo viên	Teacher	Intellectuals	41	PostGrad	med	no	NA	1	a	0	1	2	0	a	NA	a	1	buy	d	d	Trên sa mạc và trong rừng thẳm Tiếng gọi nơi hoang dã	yes	a	a	1	Kiếm sống Người mẹ Trong thế giới
2432	16.3	43074	16	6	Female	8.1	1	0	0	2	4	1	b	giáo viên	Teacher	làm ruộng	Farmer	Labor	41	UnderHi	làm ruộng	Farmer	Labor	38	Hi	med	NA	NA	1	b	1	2	1	NA	a	NA	a	1	borrow	d	a	shinnosuke cậu bé bút chì những ngày thơ ấu	yes	a	a	1	phương pháp nâng cao khả năng suy nghĩ cho học sinh học cách làm người hướng tới tương lai
2590	8.163	43076	8	7	Male	8.1	1	0	0	2	3	NA	a	chơi cờ vua	Chess player	Công Nhân	Worker	Labor	46	Hi	Buôn bán	Seller	Labor	45	Hi	rich	no	NA	1	b	1	1	1	NA	f	Truyện tranh	a	1	borrow	a	d	Non nước Việt nam Harry Potter	yes	d	a	1	Non nước Việt Nam 10 vạn câu hỏi vì sao Harry Potter
2758	8.92	43076	8	7	Female	8.1	1	0	0	3	3	1	b	NA	NA	Nông dân	Farmer	Labor	43	UnderHi	Nông dân	Farmer	Labor	43	UnderHi	rich	no	NA	1	a	0	3	2	1	a	NA	a	1	buy	a	d	Những câu chuyện cuộc sống Truyện thiếu nhi	yes	b	a	1	Những tấm lòng cao cả truyện cười truyện về cuộc sống
2767	8.101	43076	8	7	Male	8.1	1	0	0	4	3	NA	f	Lập trình viên	Programmer	Nông dân	Farmer	Labor	65	Hi	Nông dân	Farmer	Labor	61	Hi	rich	no	NA	1	f	1	3	2	1	c	NA	a	1	buy	d	a	Hạt giống tâm hồn Hướng dẫn sử dụng phần mềm lập trình	yes	b	a	1	Những tấm lòng cao cả Truyện ngụ ngôn chọn lọc Khoa học và kĩ thuật
2781	8.115	43076	8	7	Female	8.1	1	0	0	2	3	1	b	Thiết kế thời trang	Fashion designer	Thợ mộc	Worker	Labor	40	UnderHi	công ty	Businessman	Labor	32	UnderHi	med	no	NA	1	a	0	2	3	0	a	NA	a	1	borrow	a	a	Nguyễn Huy tưởng Người mặt nạ đen	yes	b	a	1	NA
2863	16.322	43074	16	8	Female	8.1	1	0	0	1	3	1	d	Đồ họa vi tính	Designer	Xây dựng	Worker	Labor	40	UnderHi	Nông dân	Farmer	Labor	36	UnderHi	med	no	NA	1	b	1	1	1	0	c	NA	a	1	buy	d	a	Tuổi thơ dữ dội Nanh trắng	yes	a	a	1	Harry Potter Sherlock Holmes Twilight
2866	16.326	43074	16	8	Male	8.1	1	0	0	1	2	NA	NA	Bộ đội	Soldier	Xây dựng	Worker	Labor	38	Hi	Công nhân	Worker	Labor	36	UnderHi	med	yes	NA	1	a	0	2	1	0	a	NA	a	1	NA	b	c	Giai thoại của những nhà văn Học ăn học nói học gói học mở	yes	a	a	1	Dế mèn phiêu lưu kí Tắt đèn Doraemon
2870	16.33	43074	16	8	Male	8.1	1	0	0	3	3	NA	d	Nhà hoá học	Chemist	Bộ đội	Soldier	Labor	50	Uni	Kinh doanh	Businessman	Labor	42	Hi	med	yes	NA	1	f	1	2	2	0	c	NA	a	1	borrow	d	a	Bài tập nâng cao hóa 8 Nâng cao và phát triển toán 8	yes	a	a	1	400 bài tập nâng cao hóa Toán nâng cao Lịch sử Việt Nam
3005	8.07	43076	8	6	Female	8.1	1	0	0	1	1	1	b	Bác sĩ	Doctor	Bộ đội	Soldier	Labor	44	Uni	Giáo viên	Teacher	Intellectuals	41	Uni	med	NA	NA	1	a	0	3	3	1	a	NA	a	1	buy	d	a	Tuổi thơ dữ dội Con Bim trắng tai đen	yes	b	a	1	Harry Potter Bong bóng lên trời Robinson ngoài đảo hoang
3024	8.18	43076	8	6	Female	8.1	1	0	0	2	2	1	d	Thiết kế thời trang	Fashion designer	Bộ đội	Soldier	Labor	46	Uni	Giáo viên	Teacher	Intellectuals	41	Uni	med	yes	NA	1	b	1	1	1	0	a	NA	a	1	borrow	d	a	Con mèo dạy hải âu bay Loài cây đắng nhất nhưng nở hoa thơm nhất	yes	d	a	1	Trà hoa nữ Harry Potter Công chúa nhỏ
3035	8.3	43076	8	6	Male	8.1	1	0	0	3	3	1	d	Nhà toán học	Scientist	Buôn bán	Seller	Labor	48	Hi	Giáo viên	Teacher	Intellectuals	42	Uni	rich	no	NA	1	a	0	2	1	0	b	NA	a	1	borrow	a	d	Không gia đình Tuổi thơ dữ dội	yes	a	a	1	Harry Potter Sherlock Homles Nicolas
3814	3.165	43071	6	7	Female	8.1	1	0	0	2	2	1	e	Công nhân	Worker	Nông dân	Farmer	Labor	NA	Hi	Nông dân	Farmer	Labor	NA	Hi	med	no	NA	1	c	1	1	1	NA	e	NA	a	1	borrow	a	a	55 cách giao tiếp tranh luận trong đời sống Những phát minh khoa học vĩ đại	yes	a	a	1	Suy nghĩ về đời sống và xã hội Lịch sử thời xưa Kiên trì
3815	3.166	43071	6	7	Female	8.1	1	0	0	2	4	1	e	Ca sĩ	Singer	Nông dân	Farmer	Labor	NA	UnderHi	Nông dân	Farmer	Labor	NA	UnderHi	med	no	NA	1	b	1	2	1	0	d	NA	a	1	borrow	a	b	Cho và nhận Hạt giống tâm hồn	yes	a	a	1	Lời cảm ơn Túp lều của bác tom Dế Mèn
3842	3.193	43071	6	7	Male	8.1	1	0	0	2	2	0	NA	Kĩ sư	Engineer	Thợ xây	Worker	Labor	42	UnderHi	Kinh doanh	Businessman	Labor	40	UnderHi	med	no	NA	0	b	1	1	2	0	a	NA	a	1	buy	b	a	Truyện văn học Phổ biến khoa học	yes	c	a	1	Bí mật cơ thể người Truyện kể gia đình Thuyền trưởng đơn vị
3871	16.173	43074	16	7	Female	8.1	1	0	0	2	2	1	d	giáo viên	Teacher	tự do	Freelancer	Labor	45	Hi	giáo viên	Teacher	Intellectuals	45	Hi	med	no	NA	1	a	0	2	2	1	c	NA	a	1	borrow	b	a	bí ẩn cơ thể người bí ẩn động vật thực vật	yes	a	a	1	300 nụ cười tuổi thơ chúc một ngày tốt lành tôi là bê tô
4469	15.3	43071	15	9	Male	8.1	1	0	0	3	3	0	a	Bác sĩ	Doctor	Nông dân	Farmer	Labor	51	Hi	Nông dân	Farmer	Labor	48	UnderHi	med	no	NA	NA	b	1	1	1	0	b	NA	a	1	buy	d	b	Ông già và biển cả, hạt giống tâm hồn	yes	b	a	1	thiên nhiên hoang dã, cây xanh đành hanh, sinh học có những câu chuyện thật kỳ diệu
4784	16.653.02	43074	16	9	Female	8.1	1	0	0	2	2	1	b	giáo viên	Teacher	nông dân	Farmer	Labor	45	UnderHi	giáo viên	Teacher	Intellectuals	43	Uni	med	no	NA	1	b	1	2	2	0	a	NA	a	1	borrow	d	a	what tôi muốn biết cái gì? hạt giống tâm hồn	yes	a	a	1	đắc nhân tâm truyện ngụ ngôn nước ngoài quà tặng cuộc sống
40	6245	43074	3	9	Female	8	1	0	0	3	3	1	a	Ca sĩ	Singer	Làm ruộng	Farmer	Labor	48	UnderHi	Làm ruộng	Farmer	Labor	44	Hi	med	no	NA	1	b	1	2	2	1	a	NA	a	1	buy	a	b	Tắt đèn Harry Potter	yes	a	a	1	Truyện Kiều Những tấm lòng cao cả Hạt giống tâm hồn
119	67	43075	2	9	Female	8	1	0	0	1	2	0	NA	kinh doanh	Businessman	làm ruộng	Farmer	Labor	36	Hi	làm ruộng	Farmer	Labor	35	Hi	med	no	NA	1	b	1	1	1	0	d	NA	a	1	buy	d	a	Nghệ thuật nói chuyện của Jack Ma Đắc Nhân Tâm	yes	a	a	1	Bỏ đi mà sống Tam Quốc Thành phố giấy
219	177	43073	3	8	Female	8	1	0	0	2	2	1	e	Bác sĩ	Doctor	Làm ruộng	Farmer	Labor	45	UnderHi	Làm ruộng	Farmer	Labor	43	UnderHi	med	yes	NA	1	c	1	2	2	0	a	NA	a	1	buy	c	b	Cách sửa đổi và làm việc của chủ tịch Hồ Chí Minh Thơ văn tinh hoa của chủ tịch Hồ Chí Minh	yes	a	a	1	Đạo đức tốt của Hồ Chí Minh Những sự kiện lịch sử của thế giới
220	178	43073	3	8	Female	8	1	0	0	2	2	1	e	Bộ đội	Soldier	Làm ruộng	Farmer	Labor	40	UnderHi	Làm ruộng	Farmer	Labor	38	UnderHi	med	no	NA	1	a	0	2	2	0	b	NA	a	1	buy	d	a	Bỉ vỏ Thơ văn tinh hoa của chủ tịch Hồ Chí Minh	yes	a	a	1	Dế Mèn phiêu lưu kí Tìm hiểu cuộc sống của Bác Hồ
276	6183	43073	3	8	Female	8	1	0	0	1	2	1	b	Bác sĩ	Doctor	Làm ruộng	Farmer	Labor	41	UnderHi	Làm ruộng	Farmer	Labor	39	UnderHi	med	no	NA	1	a	0	2	1	0	a	NA	a	1	borrow	b	a	Dế Mèn phiêu lưu ký Theo văn học chủ tịch Hồ Chí Minh	no	b	a	1	Đạo đức tốt Hồ Chí Minh Những sự kiện lích sử của thế giới
480	9.001	43073	9	6	Male	8	1	0	0	3	3	1	d	công nhân	Worker	Làm thợ	Worker	Labor	48	UnderHi	Công nhân	Worker	Labor	45	UnderHi	med	no	NA	1	b	1	3	2	1	c	NA	a	1	borrow	a	a	Quà Tặng cuộc sống Sáng chế công cụ	yes	d	a	1	Kỹ năng đánh bóng bàn, bóng rổ Đô rê mon
483	9.004	43073	9	6	Male	8	1	0	0	3	3	1	b	bác sĩ	Doctor	làm ruộng	Farmer	Labor	43	UnderHi	Làm ruộng	Farmer	Labor	40	UnderHi	med	no	NA	1	c	1	2	3	1	a	NA	a	1	borrow	a	a	Quà tặng cuộc sống Kỹ năng đánh bóng bàn	yes	b	a	1	Kỹ năng : chơi bóng bàn, bóng rổ , môn thể thao trí tuệ cờ vua
485	9.03	43073	9	6	Male	8	1	0	0	3	3	1	a	Công an	Police officer	làm ruộng	Farmer	Labor	46	UnderHi	Làm ruộng	Farmer	Labor	40	UnderHi	rich	no	NA	1	c	1	2	2	0	e	NA	a	1	borrow	a	a	Chìa khóa vàng Quà tặng cuộc sống	yes	d	a	1	An Dương Vương Cô bé lọ lem Khám phá thế giới
491	9.006	43073	9	6	Male	8	1	0	0	2	2	1	a	Công an	Police officer	làm ruộng	Farmer	Labor	37	UnderHi	Công nhân	Worker	Labor	33	UnderHi	poor	no	NA	1	a	0	3	2	1	a	NA	a	1	borrow	a	a	Mẹ sẽ không lạnh nữa Quà tặng cuộc sống	yes	b	a	1	Lá phổi xanh của thế giới Thế giới động vật Dế mèn phiêu lưu ký
492	9.026	43073	9	6	Female	8	1	0	0	2	2	1	b	Giáo viên	Teacher	Công nhân	Worker	Labor	42	UnderHi	Công nhân	Worker	Labor	34	Hi	med	yes	7000000	1	a	0	2	2	1	a	NA	a	1	borrow	a	a	Vũ trí nam Người mặt nạ đen	yes	b	a	1	Mùa châu chấu Alibaba và 40 tên cướp Truy tìm kho báu
493	9.007	43073	9	6	Female	8	1	0	0	2	2	1	a	Bác sĩ	Doctor	Công nhân	Worker	Labor	39	UnderHi	Công nhân	Worker	Labor	38	Hi	med	yes	8000000	1	b	1	3	3	0	a	NA	a	1	buy	a	a	Mùa Châu chấu Lịch sử Việt nam bằng tranh	yes	d	a	1	Đố vui dành cho học sinh cấp 2 Người khổng lồ Danh ngôn về bác
498	9.029	43073	9	6	Male	8	1	0	0	1	3	1	e	công nhân	Worker	Làm thợ	Worker	Labor	42	UnderHi	Công nhân	Worker	Labor	39	Hi	rich	yes	NA	1	b	1	2	2	0	a	NA	a	1	borrow	b	b	Chuyện kể Lý Tự Trọng Người mặt nạ đen	yes	b	a	1	An Dương Vương Khám phá thế giới Thế giới động vật
500	9.02	43073	9	6	Female	8	1	0	0	3	3	1	b	giáo viên	Teacher	làm ruộng	Farmer	Labor	48	UnderHi	Công nhân	Worker	Labor	45	UnderHi	med	no	NA	1	a	0	3	2	1	a	NA	a	1	borrow	b	c	Chìa khóa vàng Quà tặng cuộc sống	yes	a	a	1	Shin cậu bé bút chì Cô nan Đô rê mon
502	9.028	43073	9	6	Male	8	1	0	0	2	2	1	d	Công an	Police officer	Lái xe	Driver	Labor	42	UnderHi	kinh doanh	Businessman	Labor	40	UnderHi	med	no	NA	1	b	1	2	2	0	d	NA	a	1	borrow	a	a	NA	yes	d	a	1	Ba chiếc rìu Sự tích trái dứa thơm , trái xoài
510	9.037	43073	9	6	Male	8	1	0	0	1	3	1	d	luật sư	Lawyer	Làm thợ	Worker	Labor	47	Hi	Công nhân	Worker	Labor	39	Hi	med	no	NA	0	a	0	3	3	0	a	NA	a	1	buy	b	a	Những câu chuyện văn học Đô rê mon	yes	b	a	1	Sherlock Homes Đô rê mon Harry Porter
514	9.031	43073	9	6	Female	8	1	0	0	2	4	1	f	nhân viên văn phòng	Employee	Làm thợ	Worker	Labor	42	UnderHi	Công nhân	Worker	Labor	38	UnderHi	med	no	NA	1	a	0	1	1	1	c	NA	a	1	borrow	c	a	Hạt giống tâm hồn Những kỳ tích y học	yes	d	a	1	Shin Đô rê mon Sherlock Homes
515	9.054	43073	9	6	Male	8	1	0	0	1	2	NA	e	chưa xác định	NA	công an	Police officer	Labor	41	Uni	giáo viên	Teacher	Intellectuals	33	Uni	rich	no	NA	1	b	1	2	2	0	a	NA	a	1	borrow	b	d	Truyện văn học cảm thụ Đô rê mon	yes	b	a	1	Harry Porter Siêu trộm Sherlock Homes
534	9.044	43073	9	6	Male	8	1	0	0	1	3	1	b	Công an	Police officer	Công nhân	Worker	Labor	35	UnderHi	Công nhân	Worker	Labor	33	UnderHi	med	no	NA	1	b	1	1	1	0	f	Truyện tranh	a	1	buy	b	d	Đô rê mon Cô nan	yes	b	a	1	Harry Porter Co nan Đô rê mon
671	9.098	43073	9	7	Male	8	1	0	0	3	3	0	NA	Bộ đội	Soldier	làm ruộng	Farmer	Labor	45	UnderHi	Công nhân	Worker	Labor	43	Hi	med	no	NA	1	b	1	1	1	1	e	NA	a	1	buy	b	d	Núi lửa nóng hơn cả lửa Hướng dẫn và cách nuôi gà chọi	yes	c	a	1	Lịch sử Việt Nam Giới thiệu về thiên nhiên ánh sáng khoa học kỹ thuật
834	9.116	43073	9	7	Female	8	1	0	0	1	2	1	e	Bác sĩ	Doctor	Làm thợ	Worker	Labor	36	UnderHi	Làm ruộng	Farmer	Labor	34	UnderHi	med	no	NA	1	d	1	2	1	0	f	Truyện tranh	a	1	buy	a	d	Lịch sử Việt nam Núi Lửa còn nóng hơn cả lửa	yes	d	a	1	Thời kỳ đồ đá Bờ biển Truyện cổ tích việt nam
837	9.134	43073	9	7	Female	8	1	0	0	1	2	1	c	Công an	Police officer	Lái xe	Driver	Labor	39	Uni	công an	Police officer	Labor	35	Uni	rich	no	NA	1	e	1	2	2	0	c	NA	a	1	buy	d	c	Quà tặng cuộc sống Giá lạnh đầu mùa	yes	a	a	1	Có chút gì để nhớ Sát thát Cánh buồm đỏ thắm
846	9.122	43073	9	7	Female	8	1	0	0	2	2	1	b	diễn viên	Actor	Lái xe	Driver	Labor	43	Hi	kinh doanh ( bán hàng tạp hóa)	Businessman	Labor	38	NA	med	no	NA	1	b	1	2	2	0	d	NA	a	1	buy	a	a	Gió lạnh đầu mùa Mẹ sẽ không lạnh nữa	yes	a	a	1	Cánh buồm đỏ thắm Phòng chống tai nạn cho học sinh
879	11.73	43071	11	7	Female	8	1	0	0	2	3	1	b	Giáo viên	Teacher	Nông dân	Farmer	Labor	40	UnderHi	Công nhân	Worker	Labor	36	UnderHi	med	no	NA	1	a	0	2	1	0	a	NA	a	1	borrow	b	a	Chiếc hộp kì diệu Những cuộc phiêu lưu của Huck	yes	b	a	1	Doraemon Thám tử lừng danh Conan Cậu bé bút chì
984	14.38	43071	14	6	Male	8	1	0	0	4	4	1	d	Công an	Police officer	Tự do	Freelancer	Labor	43	Hi	Tự do	Freelancer	Labor	42	Hi	med	no	NA	1	b	1	1	1	0	NA	NA	a	1	buy	a	c	Thạch Sanh Ngữ văn	yes	a	a	1	Hướng tới tương lai Thám tử lừng danh Conan
985	14.39	43071	14	6	Female	8	1	0	0	1	2	1	b	Bác sĩ	Doctor	Công nhân	Worker	Labor	44	Hi	Công nhân	Worker	Labor	36	Hi	rich	no	NA	1	b	1	2	1	1	f	Tuổi học trò	a	1	buy	c	a	Candy book - Xao xuyến tuổi học trò Thám tử lừng danh Conan	yes	a	a	1	Cẩm nang con gái Không gia đình Sherlock Holmes
1009	14.82	43071	14	7	Male	8	1	0	0	2	3	1	d	Công an	Police officer	Tự do	Freelancer	Labor	42	UnderHi	Công nhân	Worker	Labor	38	UnderHi	rich	no	NA	1	a	0	2	1	0	a	NA	a	1	buy	d	a	Thám tử lừng danh Conan Doraemon	yes	d	a	1	Thám tử lừng danh Conan Thế giới tự nhiên Sách về sinh học
1011	14.84	43071	14	7	Female	8	1	0	0	1	3	1	e	Giáo viên	Teacher	Cơ khí	Engineer	Labor	37	UnderHi	Công nhân	Worker	Labor	35	UnderHi	med	no	NA	1	b	1	3	2	0	a	NA	a	1	gift	d	a	Cậu bé bút chì Danh nhân Việt Nam	yes	c	a	1	Cậu bé bút chì Thám tử lừng danh Conan Chiếc lá thuộc bài
1064	14.98	43071	14	8	Female	8	1	0	0	1	3	1	a	Công an	Police officer	Nông dân	Farmer	Labor	43	UnderHi	Nông dân	Farmer	Labor	37	UnderHi	med	no	NA	1	e	1	1	1	1	c	NA	a	1	borrow	d	a	Không gia đình Bài học lớn về đạo đức	yes	a	a	1	Thám tử lừng danh Conan Doraemon Sự ra đời của con người
1078	14.112	43071	14	8	Female	8	1	0	0	1	4	1	e	Công an	Police officer	Xây dựng	Worker	Labor	38	UnderHi	Công nhân	Worker	Labor	31	UnderHi	med	yes	4000000	1	d	1	2	1	0	a	NA	a	1	buy	a	a	Cuộc phiêu lưu kí diệu của Nils Holgersson Truyện ngắn hay	yes	b	a	1	Thám tử lừng danh Conan Doraemon Những câu truyện thần tiên
1199	1.04	43077	1	6	Female	8	1	0	0	2	2	1	a	Đầu bếp	Chef	Nông dân	Farmer	Labor	43	UnderHi	Nông dân	Farmer	Labor	40	UnderHi	med	no	NA	1	b	1	1	3	1	a	NA	a	1	buy	a	c	Không gia đình Doraemon	yes	d	a	1	Cậu bé bút chì Lịch sử Việt Nam Doraemon
1330	7.419	43071	7	8	Male	8	1	0	0	3	3	0	f	Xây dựng	Worker	Nông dân	Farmer	Labor	32	UnderHi	Nông dân	Farmer	Labor	31	UnderHi	med	yes	6000000	1	b	1	1	1	0	c	NA	a	1	borrow	d	c	Thám tử lừng danh Conan Cậu bé bút chì	yes	c	a	1	Cừu vui vẻ và sói xám Tý Quậy Tạp chí
1439	7.73	43071	7	6	Male	8	1	0	0	3	3	1	f	Giáo viên tin học	Teacher	Thợ xây	Worker	Labor	45	UnderHi	Nông dân	Farmer	Labor	45	UnderHi	med	no	NA	1	a	0	2	2	0	b	NA	a	1	buy	d	a	7 viên ngọc rồng Cổ tích	yes	a	a	1	NA
1440	7.74	43071	7	6	Male	8	1	0	0	1	2	1	d	Cảnh sát	Police officer	Thợ xây	Worker	Labor	35	UnderHi	Thợ xây	Worker	Labor	32	Hi	med	yes	4000000	1	b	1	2	2	0	f	Truyện trinh thám	a	1	buy	d	c	Thám tử lừng danh Conan Vua hải tặc	yes	a	a	1	3 chú chó thám hiểm Trận chiến sinh tử Cậu bé siêu nhiên
1455	7.89	43071	7	6	Male	8	1	0	0	2	2	1	d	Giáo viên	Teacher	Thợ xây	Worker	Labor	42	UnderHi	Xuất khẩu lao động	Worker	Labor	30	Hi	med	yes	10000000	1	b	1	2	2	0	f	Truyện trinh thám	a	1	buy	d	c	Thám tử lừng danh Conan Vua hải tặc	yes	a	a	1	Thám tử lừng danh Conan Thánh Gióng Cậu bé siêu nhiên
1460	7.94	43071	7	6	Female	8	1	0	0	1	3	1	b	Không xác định	NA	Nông dân	Farmer	Labor	41	UnderHi	Công nhân	Worker	Labor	39	UnderHi	med	yes	5000000	1	a	0	1	2	0	c	NA	a	1	borrow	c	a	NA	no	a	a	1	NA
1472	7.106	43071	7	7	Female	8	1	0	0	1	3	1	b	Bác sĩ	Doctor	Thợ xây	Worker	Labor	35	UnderHi	Nông dân	Farmer	Labor	35	Hi	rich	yes	20000000	1	a	0	2	3	1	a	NA	a	1	buy	a	a	Tuổi thơ dữ dội Dế Mèn phiêu lưu kí	yes	a	a	1	Lão Hạc Tắt đèn Chạm tới ước mơ
1572	9.198	43073	9	8	Female	8	1	0	0	3	4	1	b	Bác sĩ	Doctor	Thợ xây	Worker	Labor	49	Hi	Làm ruộng	Farmer	Labor	47	UnderHi	med	no	NA	1	b	1	2	2	1	a	NA	a	1	borrow	a	b	What? Tôi muốn biết cái gì? Truyện ngắn Nam Cao	yes	a	a	1	Truyện cười Truyện dân gian Việt Nam How? Tôi muốn biết như thế nào?
1597	9.179	43073	9	8	Male	8	1	0	0	2	2	1	a	Chưa xác định	NA	Bảo vệ	Guard	Labor	46	UnderHi	Làm ruộng	Farmer	Labor	43	UnderHi	med	no	NA	0	f	1	2	2	0	a	NA	a	1	borrow	a	d	Đắc nhân tâm What? Tôi muốn biết cái gì	yes	a	a	1	Đắc nhân tâm Vật lí vui Bách khoa toàn thư
1635	9.243	43073	9	8	Female	8	1	0	0	1	1	1	b	Bác sĩ	Doctor	Làm ruộng	Farmer	Labor	61	UnderHi	Làm ruộng	Farmer	Labor	60	UnderHi	poor	no	NA	1	a	0	2	2	0	a	NA	a	1	borrow	b	a	Truyện Kiều Hạt giống tâm hồn	yes	a	a	1	Truyện ngắn Nam Cao Lòng mẹ Từ điển Anh - Việt
1755	9.338	43073	9	9	Male	8	1	0	0	1	2	1	f	kinh doanh	Businessman	làm ruộng	Farmer	Labor	43	Hi	Bác sĩ	Doctor	Intellectuals	36	PostGrad	poor	no	NA	1	f	1	1	1	0	f	luật bóng rổ	a	1	buy	c	b	Trai nước nam làm gì Lịch sử Việt Nam	yes	a	a	1	Bụi Phấn Mười vạn câu hỏi vì sao Luật bóng rổ
1885	2.211	43076	4	8	Female	8	1	0	0	1	3	1	b	Giáo viên Ngữ văn	Teacher	Công nhân	Worker	Labor	36	UnderHi	Công nhân	Worker	Labor	36	Hi	med	no	NA	0	a	0	2	1	1	a	NA	a	1	borrow	b	d	7 chiến lược học tập thay đổi tương lai Kĩ năng giao tiếp ứng xử	yes	b	a	1	Bí quyết teen thành công Bí quyết học giỏi các môn học Quà tặng cuộc sống
1926	2.26	43076	4	6	Female	8	1	0	0	2	2	1	a	Nhà Toán học	Scientist	Bộ đội	Soldier	Labor	49	Uni	Giáo viên	Teacher	Intellectuals	43	Uni	rich	yes	NA	1	a	0	2	2	0	c	NA	a	1	buy	b	a	Túp lều Bác Tom Tuổi trẻ đáng giá bao nhiêu	yes	d	a	1	Túp lều Bác Tom Cổ tích Việt Nam Hai vạn dặm dưới đáy biển
1975	2.328	43076	4	9	Male	8	1	0	0	2	2	1	f	Giám đốc	Director	Nông dân	Farmer	Labor	41	UnderHi	Nông dân	Farmer	Labor	40	UnderHi	med	no	NA	1	b	1	3	3	0	f	Truyện cười	a	1	buy	d	a	Thám tử lừng danh Co nan Do raemon	yes	d	a	1	Sách về cuộc sống Sách hướng dẫn kĩ năng sống Sách về khoa học tự nhiên
2043	2.205	43076	4	8	Female	8	1	0	0	2	3	1	b	Công an	Police officer	Nông dân	Farmer	Labor	37	Hi	Nông dân	Farmer	Labor	34	Hi	med	no	NA	1	b	1	2	2	0	a	NA	a	1	borrow	a	b	Lũ trẻ đường ray Cho tôi xin một vé về tuổi thơ	yes	b	a	1	Tắt đèn Bí ẩn về người ngoài hành tinh Harry Potter
2048	2.2	43076	4	8	Female	8	1	0	0	1	2	1	d	Giáo viên	Teacher	Nông dân	Farmer	Labor	45	UnderHi	Nông dân	Farmer	Labor	46	UnderHi	poor	no	NA	0	c	1	2	1	0	c	NA	a	1	borrow	a	a	Harry Potter Những câu chuyện về khoa học	yes	b	a	1	Harry Potter 10 vạn câu hỏi vì sao Những câu chuyện lí thú và bổ ích
2079	2.58	43076	4	6	Female	8	1	0	0	2	2	1	b	Không xác định	NA	Thợ xây	Worker	Labor	42	UnderHi	Công nhân	Worker	Labor	38	NA	med	no	NA	1	b	1	2	2	0	e	NA	a	1	borrow	a	d	A Cư và những người bạn Cẩm nang bé gái tuổi dậy thì	yes	a	a	1	Cậu bé bút chì Doraemon Tý Quậy
2154	2.125	43076	4	7	Male	8	1	0	0	2	2	1	a	Đầu bếp	Chef	Thợ xây	Worker	Labor	40	UnderHi	Nông dân	Farmer	Labor	39	UnderHi	med	NA	NA	1	a	0	2	1	1	b	NA	a	1	buy	b	a	Giao tiếp ứng xử Nguyễn Công Hoan	yes	d	a	1	Cậu bé bút chì Doraemon Conan
2179	2.99	43076	4	7	Male	8	1	0	0	3	3	1	f	Giáo viên tin	Teacher	Nông dân	Farmer	Labor	NA	UnderHi	Nông dân	Farmer	Labor	NA	UnderHi	rich	no	NA	NA	a	0	2	2	0	a	NA	a	1	borrow	b	a	Thạch Sanh Thánh Gióng	yes	a	a	1	Bí quyết thành công1 Bí quyết thành công2 Đại Việt sử ký toàn thư
2181	2.97	43076	4	7	Male	8	1	0	0	3	3	1	f	Nhà Khoa học	Scientist	Thợ xây	Worker	Labor	NA	UnderHi	Công nhân	Worker	Labor	NA	UnderHi	med	no	NA	1	a	0	2	2	1	c	NA	a	1	borrow	c	a	Những nhà phát minh vĩ đại Danh nhan thế giới	yes	d	a	1	Nhật kí trong tù Tư duy tâm hồn Đại Việt sử kí toàn thư
2185	2.93	43076	4	7	Female	8	1	0	0	1	2	1	a	Bác sĩ	Doctor	Công Nhân	Worker	Labor	38	UnderHi	Công nhân	Worker	Labor	34	UnderHi	med	no	NA	1	a	0	2	3	0	a	NA	a	1	borrow	d	a	Hạt giống tâm hồn Xứ sở tàng hình	yes	b	a	1	Cô gái đến từ hôm qua Hoa hồng xứ khác Đi qua hoa cúc
2186	2.92	43076	4	NA	Female	8	1	0	0	3	3	1	b	Bác sĩ	Doctor	Nông dân	Farmer	Labor	45	NA	Nông dân	Farmer	Labor	41	NA	poor	no	NA	1	a	0	3	2	0	e	NA	a	1	borrow	d	a	Cho tôi xin một vé đi tuổi thơ Đại việt sử kí	yes	d	a	1	Cô gái đến từ hôm qua Mắt biếc Đi qua mùa hạ
2189	2.89	43076	4	7	Male	8	1	0	0	2	2	NA	f	Nhà phát minh	Inventor	Nông dân	Farmer	Labor	NA	Hi	Nông dân	Farmer	Labor	NA	Hi	med	NA	NA	0	f	1	2	2	1	a	NA	a	1	borrow	a	a	Tắt đèn Mẹ-biểu hiện của tình thương	yes	d	a	1	Gió lạnh đầu mùa Đại Việt sử kí Cho tôi xin 1 vé đi tuổi thơ
2193	2.85	43076	4	7	Male	8	1	0	0	1	2	NA	d	Cảnh sát cơ động	Police officer	Nông dân	Farmer	Labor	41	NA	Nông dân	Farmer	Labor	36	NA	med	yes	4000000	0	a	0	2	2	0	c	NA	a	1	borrow	d	a	Vì sao, như thế nào về không gian Những nhà phát minh vĩ đại	yes	d	a	1	Tắt đèn Thời thơ ấu Kiếm sống
2235	8.286	43076	8	8	NA	8	1	0	0	5	6	1	d	Diễn viên	Actor	Nông dân	Farmer	Labor	57	UnderHi	Nông dân	Farmer	Labor	47	UnderHi	med	no	NA	1	b	1	2	2	0	f	Sách tự nhiên	a	1	borrow	d	NA	Kì quan thế giới Vật lý lí thú	no	a	a	1	Khám phá vũ trụ hạt giống tâm hồn công nghệ Sinh học
2337	8.179	43076	8	8	Male	8	1	0	0	3	3	1	f	Công nghệ thông tin	Engineer	Nông dân	Farmer	Labor	43	UnderHi	Nông dân	Farmer	Labor	40	UnderHi	med	no	NA	1	b	1	1	1	0	c	NA	a	1	borrow	a	c	Rôbinxon 100 chuyện thần đồng trên thế giới	yes	b	a	1	Không gia đình Dế Mèn Túp lều của bác Tom
2365	16.02	43074	16	6	Female	8	1	0	0	2	2	1	NA	Cảnh sát	Police officer	Nông dân	Farmer	Labor	41	Hi	Giáo viên	Teacher	Intellectuals	36	PostGrad	med	no	NA	1	a	0	2	2	1	f	truyện tranh	a	1	borrow	d	c	1000 điều cấm kị trong cuộc sống Shin cậu bé bút chì	yes	a	a	1	Doraemon Dế mèn phiêu lưu kí Những truyện hay trên thế giới
2505	16.37	43074	16	6	Male	8	1	0	0	1	2	1	c	bác sĩ	Doctor	làm ruộng	Farmer	Labor	39	UnderHi	làm ruộng	Farmer	Labor	36	UnderHi	med	no	NA	1	f	1	2	1	1	a	NA	a	1	buy	a	a	những kì tích y học chiếc lá thuộc bài	yes	a	a	1	những cách học hay cách học từ vựng nhanh 150 bài văn hay
2515	16.42	43074	16	6	Female	8	1	0	0	3	3	1	a	giáo viên	Teacher	làm ruộng	Farmer	Labor	47	UnderHi	làm ruộng	Farmer	Labor	46	UnderHi	med	no	5000000	0	a	0	1	1	0	d	NA	a	1	borrow	b	a	quà tặng cuộc sống truyện cổ tích dành cho người lớn	yes	a	a	1	doraemon shin truyện cổ tích
2593	8.164	43076	8	7	Male	8	1	0	0	1	2	1	d	Nhà sản xuất nông nghiệp	Businessman	Thợ xây	Worker	Labor	41	Hi	Công nhân	Worker	Labor	34	Hi	med	no	NA	1	f	1	1	NA	1	f	Truyện tranh	a	1	borrow	a	a	Cánh buồm đỏ thắm Khoa học lí thú của Anhxtanh	yes	d	a	1	Tắt đèn 1000 câu hỏi vì sao Những tấm lòng cao cả
2629	15.33	43071	15	6	Female	8	1	0	0	2	2	1	a	Kế toán	Accountant	Đã mất	NA	Labor	NA	NA	Nông dân	Farmer	Labor	40	UnderHi	med	no	NA	1	a	0	1	1	0	e	NA	a	1	borrow	b	a	hạt giống tâm hồn, chiếc lạ thuộc bài	yes	b	a	1	Tắt đèn, conan, doraemon
2679	15.49	43071	15	6	Female	8	1	0	0	3	3	1	d	May mặc	Tailor	Nông dân	Farmer	Labor	45	UnderHi	Nông dân	Farmer	Labor	41	UnderHi	med	no	NA	1	b	1	3	1	0	e	NA	a	1	borrow	a	a	quà tặng cuộc sống, hạt giống tâm hồn	yes	c	a	1	chuỗi hạt gườm màu xám, trong lời mẹ hát, bí mật học đường
2681	15.51	43071	15	6	Female	8	1	0	0	1	2	1	c	Ca sĩ	Singer	Tự do	Freelancer	Labor	34	Hi	Giáo viên mầm non	Teacher	Intellectuals	31	Hi	med	yes	NA	1	b	1	2	1	1	d	NA	a	1	gift	b	a	chiếc lá thuộc bài, quê nội	yes	b	a	1	conan, shin - cậu bé bút chì, báo nhi đồng
2822	15.55	43071	15	6	Male	8	1	0	0	3	3	1	d	Cầu thủ	Footballer	Nông dân	Farmer	Labor	45	UnderHi	Nông dân	Farmer	Labor	43	UnderHi	med	no	NA	1	b	1	1	1	0	e	NA	a	1	borrow	a	b	Những tấm lòng cao cả, không gia đình	yes	c	a	1	tắt đèn, conan, Shin cậu bé bút chì
2951	16.396	43074	16	8	Female	8	1	0	0	2	2	1	b	Công an	Police officer	Nông dân	Farmer	Labor	42	Hi	Nông dân	Farmer	Labor	38	UnderHi	med	no	NA	NA	b	1	2	3	1	a	NA	a	1	borrow	d	d	Hạt giống tâm hồn Công nghệ sinh học	yes	b	a	1	Danh nhân thế giới Khát vọng sống Bí quyết học tốt các môn ở trường
2965	16.406	43074	16	8	Male	8	1	0	0	2	3	1	a	Công an	Police officer	Nông dân	Farmer	Labor	46	UnderHi	Nông dân	Farmer	Labor	44	Hi	med	no	NA	1	b	1	1	1	0	c	NA	a	1	borrow	c	a	Khám phá rừng Vật lí lý thú	yes	a	a	1	Chuyện vui vật lý Sáng chế công cụ Hướng tới tương lai
3014	15.67	43071	15	6	Male	8	1	0	0	3	3	1	a	Cảnh sát	Police officer	Nông dân	Farmer	Labor	54	UnderHi	Nông dân	Farmer	Labor	47	UnderHi	rich	NA	NA	1	b	1	2	1	0	a	NA	a	1	buy	d	c	hai vạn năm dưới đáy biển, hạt giống tâm hồn	yes	a	a	1	tiếng gọi của hoang dã, hạt giống tâm hồn, phương pháp nâng cao khả năng tập trung cho học sinh
3015	15.68	43071	15	6	Male	8	1	0	0	2	3	1	a	Bộ đội	Soldier	Nông dân	Farmer	Labor	38	UnderHi	Nông dân	Farmer	Labor	32	UnderHi	med	NA	NA	1	b	1	2	1	0	a	NA	a	1	buy	a	a	Conan, Shin cậu bé bút chì	yes	a	a	1	Doraemon, Conan, Shin cậu bé bút chì
3025	8.2	43076	8	6	Female	8	1	0	0	1	3	1	b	Nhà Văn	Writer	Nông dân	Farmer	Labor	50	Hi	Công nhân	Worker	Labor	37	Hi	med	no	NA	1	b	1	1	1	NA	f	Truyện tranh	a	1	borrow	d	d	Sống đẹp mỗi ngày Kĩ năng sống dành cho học sinh	yes	a	a	1	Harry Potter Sống đẹp mỗi ngày Conan
3126	3.13	43071	6	9	Male	8	1	0	0	3	3	1	d	Kĩ sư xây dựng	Engineer	Nông dân	Farmer	Labor	47	Hi	Nông dân	Farmer	Labor	44	UnderHi	med	no	NA	1	b	1	1	1	1	a	NA	a	1	borrow	a	d	Cậu bé nhút nhát Nữ hoàng Victoria và đế chế khổng lồ	yes	a	a	1	Cuộc Đời của Pi Còn chút gì để nhớ Nhân ái và bao dung
3133	3.2	43071	6	9	Female	8	1	0	0	5	5	1	e	Bộ đội	Soldier	Nông dân	Farmer	Labor	46	UnderHi	Nông dân	Farmer	Labor	42	UnderHi	med	no	NA	1	e	1	1	1	0	c	NA	a	1	borrow	d	b	Lịch sử Việt Nam Địa lý lí thú	yes	b	a	1	Tâm sinh lý Nhân ái và bao dung Còn chút gì để nhớ
3188	15.84	43071	15	6	Male	8	1	0	0	4	4	1	a	Bác sĩ	Doctor	Nông dân	Farmer	Labor	50	Hi	Nông dân	Farmer	Labor	47	Hi	med	NA	NA	1	b	1	1	2	0	f	truyện tranh	a	1	buy	a	a	doraemon, shin	yes	a	a	1	Conan, doraemon, shin
3190	15.86	43071	15	6	Male	8	1	0	0	3	3	1	a	công an	Police officer	Nông dân	Farmer	Labor	44	Hi	Công nhân	Worker	Labor	37	NA	med	NA	NA	1	b	1	1	1	0	f	truyện tranh	a	1	buy	b	c	bác sĩ ai-bo-lit, hạt giống tâm hồn	yes	a	a	1	Conan, doraemon, shin
3198	15.95	43071	15	7	Female	8	1	0	0	2	3	1	e	Giáo viên	Teacher	Tự do	Freelancer	Labor	37	UnderHi	Tự do	Freelancer	Labor	36	UnderHi	med	no	NA	1	b	1	2	2	0	a	NA	a	1	buy	d	a	Shin, Tý quậy	yes	b	a	1	Truyện kiều, án mang trên chuyến tàu tốc hành phương đông, những ngày thơ ấu
3200	15.97	43071	15	7	Female	8	1	0	0	2	3	1	e	Vận động viên	Athlete	Nông dân	Farmer	Labor	45	UnderHi	Nông dân	Farmer	Labor	40	UnderHi	med	no	NA	1	b	1	1	1	0	a	NA	a	1	buy	a	a	Conan, những tấm lòng cao cả	yes	d	a	1	Nguyễn nhật ánh, Tắt đèn, Chiếc hộp kì diệu
3223	15.119	43071	15	7	Female	8	1	0	0	2	3	1	d	Bác sĩ	Doctor	Nông dân	Farmer	Labor	47	Hi	Nông dân	Farmer	Labor	36	Hi	med	no	NA	1	b	1	2	2	0	d	NA	a	1	borrow	a	a	Còn gì để nhớ, Shin	yes	d	a	1	Chí phèo, những ngày thơ ấu, tôi thấy hoa vàng trên cỏ xanh
3225	16.481	43074	16	8	Male	8	1	0	0	1	2	1	a	giáo viên	Teacher	tự do	Freelancer	Labor	37	Hi	tự do	Freelancer	Labor	36	UnderHi	med	no	NA	1	b	1	2	1	0	b	NA	a	1	borrow	d	a	danh nhân thế giới lịch sử việt nam	yes	a	a	1	cổ tích việt nam 1001 truyện cười khám phá thế giới động vật
3290	16.522	43074	16	9	Male	8	1	0	0	2	2	1	a	diễn viên	Actor	nông dân	Farmer	Labor	42	UnderHi	nông dân	Farmer	Labor	37	UnderHi	med	yes	10000000	1	b	1	1	1	0	d	NA	a	1	borrow	b	c	gió lạnh đầu mùa tiểu thuyết bí đỏ	yes	a	a	1	100 khám phá khoa học vĩ đại nhất mọi thời đại tư duy tích cực cuốc đời của pi
3479	3.86	43071	6	9	Male	8	1	0	0	1	2	1	d	Giả Lập viên	Programmer	Giáo viên	Teacher	Intellectuals	39	Uni	Giáo viên	Teacher	Intellectuals	37	Uni	med	no	NA	1	f	1	2	1	NA	f	Khoa học	a	1	buy	a	a	Hóa học lí thú What	yes	a	a	1	Khám phá thế giới Sự hình thành của vũ trụ Các loài động vật lạ
3561	3.121	43071	6	8	Female	8	1	0	0	2	2	1	a	làm giày da	Worker	Nông dân	Farmer	Labor	48	UnderHi	Tự do	Freelancer	Labor	47	UnderHi	med	no	NA	1	b	1	2	1	0	d	NA	a	1	borrow	a	a	NA	yes	a	a	1	Giao thông Rèn luyện ý chí Những kì tích y học
3586	3.135	43071	6	8	Male	8	1	0	0	1	2	1	c	Ca sĩ	Singer	Thợ xây	Worker	Labor	39	NA	công ty	Businessman	Labor	37	Hi	med	no	NA	1	a	0	2	1	1	f	Ngoại ngữ	a	1	buy	b	a	Ngoại ngữ truyện văn học	yes	d	a	1	Sách danh nhân Hướng dẫn nghề Phổ biến khoa học
3630	16.116	43074	16	6	Male	8	1	0	0	1	3	1	f	công an	Police officer	thợ xây	Worker	Labor	35	UnderHi	làm ruộng	Farmer	Labor	33	UnderHi	med	yes	3000000	0	c	1	1	1	0	a	NA	a	1	borrow	a	a	khám phá động vật biển 150 bài văn hay	yes	a	a	1	cậu bé bút chì conan - thám tử lừng danh cừu vui vẻ và sói xám
3702	15.185	43071	15	8	Female	8	1	0	0	3	3	1	e	Bác sĩ	Doctor	Thợ xây	Worker	Labor	41	Hi	Nông dân	Farmer	Labor	33	Hi	poor	no	NA	0	b	1	2	2	0	a	NA	a	1	borrow	d	b	Tắt đèn, Ngữ pháp tiếng anh	yes	b	a	1	Donkihote, Truyện Kiều, Tiểu sử nhà văn Nam Cao
3707	15.186	43071	15	8	Female	8	1	0	0	2	4	1	d	Bác sĩ	Doctor	Xây dựng	Worker	Labor	46	Hi	NA	NA	NA	NA	NA	med	no	NA	1	a	0	2	NA	1	a	NA	a	1	borrow	d	b	Khát vọng sống, hãy đặt trách nhiệm lên vai	yes	b	a	1	hành trang cuộc sống, sống bằng cả trái tim, tình yêu bất tận của mẹ
3743	15.2	43071	15	8	Female	8	1	0	0	2	3	1	f	Bác sĩ	Doctor	Công nhân	Worker	Labor	41	Hi	Công nhân	Worker	Labor	37	Hi	med	no	NA	1	a	0	2	1	1	a	NA	a	1	borrow	b	a	hạt giống tâm hồn, Kỹ năng giao tiếp	yes	a	a	1	Truyện ngắn Nam Cao, Kỳ quan thế giới, Khát vọng sống
3747	15.201	43071	15	8	Female	8	1	0	0	3	3	1	f	Diễn viên	Actor	Nông dân	Farmer	Labor	47	Hi	Nông dân	Farmer	Labor	47	Hi	rich	no	NA	1	b	1	2	2	0	a	NA	a	1	borrow	d	a	kỹ năng giao tiếp, ngữ pháp tiếng anh	yes	c	a	1	Hướng dẫn kỹ thuật tập luyện bóng rổ, Ngô Tất Tố, Nam cao
3749	15.202	43071	15	8	Female	8	1	0	0	2	3	1	NA	Diễn viên	Actor	Nông dân	Farmer	Labor	37	UnderHi	Nông dân	Farmer	Labor	35	UnderHi	rich	no	NA	1	a	0	2	2	0	d	NA	a	1	borrow	b	a	Kỹ năng nói, hoang mạc hoang sơ	yes	d	a	1	Cho tôi một vé đi tuổi thơ, Tắt đèn, Dế mèn phưu lưu ký
3753	15.204	43071	15	8	Male	8	1	0	0	2	2	1	b	Lập Trình viên	Programmer	Thợ xây	Worker	Labor	39	UnderHi	Nông dân	Farmer	Labor	36	UnderHi	med	no	NA	1	b	1	1	2	1	f	Kỹ năng sống	a	1	buy	a	b	Kĩ năng nói, mỗi ngày một niềm vui	yes	d	a	1	What tôi muốn biết cái gì?, Chỉ thua khi đầu hàng, yêu thương khi còn có thể
3754	15.205	43071	15	8	Female	8	1	0	0	1	4	NA	f	Bác sĩ	Doctor	Nông dân	Farmer	Labor	39	UnderHi	Nông dân	Farmer	Labor	35	UnderHi	med	no	NA	1	b	1	2	1	0	a	NA	a	1	borrow	b	c	Kỹ năng làm việc đồng đội, hạt giống tâm hồn	yes	a	a	1	Truyện ngắn Nam Cao, Khát vọng sống, kỹ năng giao tiếp
3755	15.206	43071	15	8	Female	8	1	0	0	2	2	1	f	Giáo viên	Teacher	Nông dân	Farmer	Labor	42	UnderHi	Công nhân	Worker	Labor	38	UnderHi	med	yes	5000000	1	b	1	1	2	0	d	NA	a	1	borrow	b	a	truyện ngắn Nam Cao, Kỳ quan thế giới	yes	b	a	1	Hạt giống tâm hồn, Học ăn học nói học gói học mở, kỹ năng giao tiếp
3761	15.209	43071	15	8	Male	8	1	0	0	1	3	1	f	Cầu thủ bóng đá	Footballer	Nông dân	Farmer	Labor	41	Hi	Nông dân	Farmer	Labor	38	Hi	med	no	NA	0	a	0	2	1	0	NA	NA	a	1	borrow	d	a	kỹ năng giao tiếp, Ngữ pháp tiếng anh	yes	b	a	1	doraemon, thần thoại Hy Lạp, Dế mèn phưu lưu ký
3773	15.213	43071	15	8	Male	8	1	0	0	3	3	1	d	Cầu thủ bóng đá	Footballer	Nông dân	Farmer	Labor	46	Hi	Công nhân	Worker	Labor	44	Hi	med	no	NA	1	a	0	3	1	1	a	NA	a	1	borrow	d	a	tôi muốn biết khi nào, tôi muốn biết vì sao	yes	b	a	1	Tôi muốn biết mọi thứ( about) tôi muốn biết ở đâu, tôi muốn biết cái gì
3813	3.164	43071	6	7	Male	8	1	0	0	1	2	1	e	Bác sĩ	Doctor	Nông dân	Farmer	Labor	43	Hi	Giáo viên	Teacher	Intellectuals	37	Uni	med	no	NA	1	f	1	2	1	0	f	Lịch sử	a	1	borrow	a	a	Đại Việt sử kí toàn thư Truyện Kiều	yes	b	a	1	Kiên trì Lịch sử thời xưa Suy nghĩ về đời sống xã hội
3829	3.18	43071	6	7	Male	8	1	0	0	2	2	0	NA	Giáo viên	Teacher	Nông dân	Farmer	Labor	NA	UnderHi	Nông dân	Farmer	Labor	NA	UnderHi	med	no	NA	1	e	1	2	1	0	a	NA	a	1	borrow	b	b	Conan Doraemon	yes	c	a	1	Đại Việt sử kí Truyện Kiều Binh thư yếu lược
3838	3.189	43071	6	7	Female	8	1	0	0	1	3	0	NA	Bác sĩ	Doctor	Thợ xây	Worker	Labor	NA	UnderHi	công ty	Businessman	Labor	NA	UnderHi	med	no	NA	1	b	1	1	2	0	e	NA	a	1	borrow	a	b	1000 câu hỏi vì sao Sách hướng dẫn nghề	yes	a	a	1	1000 câu hỏi vì sao Đại Việt sử kí toàn thư Truyện Kiều
3864	16.166	43074	16	7	Female	8	1	0	0	3	0	1	d	giáo viên	Teacher	thợ xây	Worker	Labor	49	UnderHi	nông dân	Farmer	Labor	50	UnderHi	med	no	NA	1	f	1	2	2	0	d	NA	a	1	borrow	d	a	tình cha những tấm lòng cao cả	yes	d	a	1	tình thân ái tình mẫu tử tình thầy trò
3867	16.169	43074	16	7	Female	8	1	0	0	4	4	NA	d	bác sĩ	Doctor	thợ xây	Worker	Labor	50	Hi	nông dân	Farmer	Labor	51	Hi	med	no	NA	1	a	0	2	1	0	c	NA	a	1	buy	a	b	bí ẩn cơ thể con người tắt đèn	yes	b	a	1	cô gái đến từ hôm qua ánh sáng khoa học những chàng trai xấu tính
3868	16.17	43074	16	7	Male	8	1	0	0	2	2	1	d	kiện tướng cờ vua	Chess player	thợ xây	Worker	Labor	45	Hi	làm ruộng	Farmer	Labor	43	Hi	med	no	NA	0	b	1	2	2	0	c	NA	a	1	buy	a	a	bí ẩn mãi mãi là bí ẩn 10 vạn câu hỏi vì sao	yes	b	a	1	đường lên đỉnh olympia bí ẩn mãi mãi là bí ẩn 2 câu đố dân gian
3870	16.172	43074	16	7	Male	8	1	0	0	4	4	1	d	NA	NA	tự do	Freelancer	Labor	49	Hi	làm ruộng	Farmer	Labor	49	Hi	med	no	NA	1	a	0	2	1	0	c	NA	a	1	borrow	c	a	ánh sáng khoa học kĩ thuật hướng tới tương lai	yes	b	a	1	10 vạn câu hỏi vì sao bí mật về thế giới động vật kì quan thế giới thực vật
3983	16.194	43074	16	7	Male	8	1	0	0	2	2	1	e	bộ đội	Soldier	giáo viên	Teacher	Intellectuals	NA	Uni	giáo viên	Teacher	Intellectuals	NA	Uni	med	no	NA	1	b	1	2	1	0	b	NA	a	1	buy	a	a	danh nhân thế giới helen danh nhân thế giới anhxtanh	no	a	a	1	danh nhân thế giới niuton danh nhân thế giới noben danh nhân thế giới edison
4009	10.112	43074	5	6	Female	8	1	0	0	1	2	1	b	bác sĩ	Doctor	lái xe	Driver	Labor	34	UnderHi	nông dân	Farmer	Labor	34	Hi	rich	no	NA	1	c	1	2	1	0	a	NA	a	1	buy	d	a	50 tác phẩm văn học thiếu nhi kinh điển hay nhất kiến thức thực vật	yes	b	a	1	tấm cám cây khế truyện lý thường kiệt
4034	10.135	43075	5	7	Female	8	1	0	0	1	3	1	c	bác sĩ	Doctor	xây dựng	Worker	Labor	39	UnderHi	công nhân	Worker	Labor	33	UnderHi	med	NA	NA	1	a	0	2	2	NA	a	NA	a	1	borrow	a	a	bí mật cơ thể người những câu chuyện hay viết cho thiếu nhi	yes	b	a	1	người mẹ của một thiên tài chiếc hộp kì diệu cô bé quàng khăn đỏ
4047	10.142	43075	5	7	Female	8	1	0	0	1	2	1	e	kế toán	Accountant	thợ mộc	Worker	Labor	42	Hi	nông dân	Farmer	Labor	NA	Hi	rich	no	NA	1	e	1	2	2	1	a	NA	a	1	borrow	a	a	những tấm lòng cao cả 1 triệu câu hỏi vì sao	yes	b	a	1	còn chút gì để nhớ truyện tranh lịch sử việt nam 12 nàng công chúa
4049	10.144	43075	5	7	Male	8	1	0	0	2	2	1	e	ca sĩ	Singer	nông dân	Farmer	Labor	43	NA	nông dân	Farmer	Labor	38	NA	NA	no	NA	1	b	1	3	1	1	c	NA	a	1	buy	a	a	bí ẩn cơ thể người 10 triệu câu hỏi vì sao	yes	b	a	1	7 viên ngọc rồng naruto nâng cao và phát triển toán
4055	10.15	43075	5	7	Female	8	1	0	0	2	2	1	d	giáo viên	Teacher	lái xe	Driver	Labor	45	NA	thợ may	Worker	Labor	45	NA	rich	NA	2000000	1	a	0	2	2	1	e	NA	a	1	borrow	b	a	những tấm lòng cao cả núi lửa nóng hơn cả lửa	yes	a	a	1	1 triệu câu hỏi vì sao chiếc hộp kì diệu cánh buồm đỏ thắm
4058	10.152	43075	5	7	Female	8	1	0	0	2	2	1	d	giáo viên	Teacher	xây dựng	Worker	Labor	38	Hi	công nhân	Worker	Labor	36	UnderHi	med	NA	NA	1	b	1	2	1	0	e	NA	a	1	borrow	a	b	những tấm lòng cao cả bí ẩn về cơ thể người	yes	a	a	1	truyện tranh lịch sử tình cha 3 ngày nước tí hon
4118	10.196	43075	5	7	Female	8	1	0	0	1	3	1	NA	đầu bếp	Chef	nông dân	Farmer	Labor	39	UnderHi	nông dân	Farmer	Labor	35	UnderHi	med	no	NA	1	c	1	2	3	1	e	NA	a	1	borrow	d	a	những phương pháp dạy nấu ăn cách làm những món ăn ngon	yes	d	a	1	doraemon từ điển tiếng anh hoa dọc chiến hào
4130	15.234	43071	15	8	Female	8	1	0	0	1	4	1	d	Ca sĩ	Singer	Nông dân	Farmer	Labor	45	UnderHi	Nông dân	Farmer	Labor	42	Hi	NA	no	NA	1	a	0	2	2	NA	a	NA	a	1	borrow	a	b	Hãy đặt trách nhiệm lên vai, Truyện cổ tích VN	NA	b	a	1	Truyện Kiều, Tấm Cám, Doraemon
4131	15.235	43071	15	8	Male	8	1	0	0	3	3	1	f	Diễn viên	Actor	Nông dân	Farmer	Labor	46	UnderHi	Nông dân	Farmer	Labor	45	UnderHi	med	no	NA	1	a	0	2	2	0	a	NA	a	1	borrow	a	b	Truyện cổ tích, Truyện tranh	yes	a	a	1	Tấm Cám, doraemon, Dế mèn phưu lưu ký
4134	15.238	43071	15	8	Female	8	1	0	0	2	3	1	e	Bác sĩ	Doctor	Nông dân	Farmer	Labor	43	UnderHi	Nông dân	Farmer	Labor	32	UnderHi	med	no	NA	1	a	0	2	2	0	a	NA	a	1	borrow	a	b	Truyện cổ tích VN, Lịch sử VN	yes	a	a	1	Chí Phèo, Truyện Kiều, Truyện màu
4136	15.24	43071	15	8	Male	8	1	0	0	2	2	1	f	Kĩ sư	Engineer	Nông dân	Farmer	Labor	45	UnderHi	Nông dân	Farmer	Labor	43	UnderHi	NA	no	NA	1	a	0	2	2	0	a	NA	a	1	borrow	a	d	Học sinh thanh lịch, những phát minh mới	yes	b	a	1	Truyện Kiều, Tắt đèn, Tuyển tập Ngô Tất Tố
4138	15.242	43071	15	8	Male	8	1	0	0	1	2	1	f	Game thủ	Gamer	Nông dân	Farmer	Labor	41	Hi	Nông dân	Farmer	Labor	36	UnderHi	NA	NA	NA	1	b	1	2	NA	0	a	NA	a	1	borrow	a	d	Truyện văn học Việt Nam,truyện cổ tích Việt Nam	NA	a	a	1	Doraemon, Truyện tranh màu, những câu đố hay
4160	3.232	43071	6	6	Male	8	1	0	0	2	2	1	d	Phi công	Pilot	Công Nhân	Worker	Labor	47	Hi	Giáo viên	Teacher	Intellectuals	38	Uni	rich	NA	NA	NA	b	1	1	1	1	f	Truyện cười	a	1	buy	a	a	cười khỏe,khỏe cười Tiếu lâm truyện cười	yes	d	a	1	Tấm lòng cao cả Thế giới động vật Vũ Khí chiến tranh
4183	3.255	43071	6	6	Male	8	1	0	0	4	4	1	a	Giáo viên	Teacher	Nông dân	Farmer	Labor	60	NA	Giáo viên mầm non	Teacher	Intellectuals	45	Uni	med	yes	5000000	NA	f	1	2	2	1	a	NA	a	1	borrow	a	a	Thần đồng đất Việt Thiên văn học	yes	d	a	1	Dế Mèn Khám phá thế giới Khoa học xã hội
4194	15.244	43071	15	8	Male	8	1	0	0	3	3	NA	e	Bác sĩ	Doctor	Nông dân	Farmer	Labor	54	Hi	Nông dân	Farmer	Labor	51	UnderHi	med	no	NA	1	a	0	2	2	NA	a	NA	a	1	borrow	a	b	lịch sử VN, Truyện cổ tích việt nam	NA	b	a	1	doraemon, Truyện cổ tích việt nam, Shin cậu bé bút chì
4358	10.322	43074	5	8	Female	8	1	0	0	2	3	1	b	giáo viên	Teacher	nông dân	Farmer	Labor	40	NA	không xác định	NA	Labor	36	NA	NA	NA	NA	1	b	1	2	1	0	a	NA	a	1	borrow	a	d	kĩ năng sống của học sinh khảo cổ dễ sợ	yes	b	a	1	bụi phấn
4458	15.289	43071	15	9	Male	8	1	0	0	2	2	1	f	Cầu thủ bóng đá	Footballer	Nông dân	Farmer	Labor	45	Hi	Nông dân	Farmer	Labor	40	UnderHi	med	no	NA	1	a	0	2	2	0	e	NA	a	1	borrow	d	a	Mười vạn câu hỏi vì sao, khoa học lý thú	yes	a	a	1	trước vòng chung kết, có chút gì để nhớ, buổi chiều windows
4461	15.292	43071	15	9	Female	8	1	0	0	2	4	1	b	Nhà báo	Journalist	Nông dân	Farmer	Labor	45	NA	Nông dân	Farmer	Labor	36	NA	med	NA	NA	1	a	0	2	2	0	a	NA	a	1	buy	a	a	Cô gái đến từ hôm qua, tôi thấy hoa vàng trên cỏ xanh	yes	a	a	1	Ngày xưa có một chuyện tình, hoa hồng xứ khác, cho tôi xin một vé đi tuổi thơ
4465	15.296	43071	15	9	Male	8	1	0	0	1	2	1	d	Bác sĩ	Doctor	Công nhân	Worker	Labor	45	Uni	Giáo viên	Teacher	Intellectuals	45	PostGrad	rich	no	NA	1	a	0	3	2	0	c	NA	a	1	borrow	a	a	nữ hoàng victoria và đế chế khổng lồ, truyện kiều	NA	a	a	1	chuyện lạ thế giới, hướng dẫn chơi cờ vua, gió lạnh đầu mùa
4474	10.39	43074	5	9	Female	8	1	0	0	2	3	1	c	không xác định	NA	nông dân	Farmer	Labor	43	Hi	nông dân	Farmer	Labor	41	Hi	med	no	NA	1	b	1	1	1	0	f	sách thông diệp cuộc sống	a	1	borrow	b	d	đại lí lí thú còn chút gì để nhớ	yes	c	a	1	hạt giống tâm hồn chí phèo kĩ năng sống
4478	15.305	43071	15	9	Female	8	1	0	0	1	2	1	b	Điều dưỡng	Nurse	Bộ đội	Soldier	Labor	42	PostGrad	Điều dưỡng	Nurse	Labor	37	Uni	med	no	NA	1	a	0	2	1	0	a	NA	a	1	borrow	a	b	bàn có 5 chỗ ngồi, lá nằm trong lá	yes	b	a	1	tôi thấy hoa vàng trên cỏ xanh, Nam Cao, ngồi khóc trên cây
4481	15.306	43071	15	9	Female	8	1	0	0	2	3	1	d	công an	Police officer	Nông dân	Farmer	Labor	51	Hi	Nông dân	Farmer	Labor	41	Hi	med	no	NA	1	f	1	2	2	0	f	Khoa học viễn tưởng	a	1	buy	d	d	Những tác phẩm văn học hay nhất mọi thời đại	yes	a	a	1	cô bé martical, chuyện lạ thế giới, lịch sử các nước châu Á
4492	15.308	43071	15	9	Male	8	1	0	0	3	3	1	b	công an	Police officer	Nông dân	Farmer	Labor	44	Hi	Nông dân	Farmer	Labor	41	UnderHi	med	no	NA	1	b	1	2	2	1	a	NA	a	1	borrow	a	a	còn chút gì để nhớ, hai bàn tay trắng	yes	c	a	1	Truyện Bác Hồ, Dân chơi bóng rổ, thông điệp cuộc sống
4525	10.434	43074	5	9	Female	8	1	0	0	3	4	1	d	công an	Police officer	thợ xây	Worker	Labor	45	Hi	công nhân	Worker	Labor	40	UnderHi	NA	no	NA	1	b	1	2	1	1	f	khác	a	1	borrow	d	a	kiên trì 10 điều làm nên số phận	yes	a	a	1	truyện văn học truyện kiều doraemon
4542	15.32	43071	15	9	Female	8	1	0	0	3	4	1	d	công an	Police officer	Nông dân	Farmer	Labor	44	UnderHi	Nông dân	Farmer	Labor	40	Hi	med	no	NA	1	d	1	1	2	0	e	NA	a	1	borrow	a	a	ngôn ngữ cơ thể, hạt giống tâm hồn	yes	b	a	1	Thông điệp hạnh phúc, ghi nhở trong một phút, cút bắt tình yêu
4749	10.523		5	9	Female	8	1	0	0	1	3	1	b	giáo viên	Teacher	nông dân	Farmer	Labor	38	Hi	nông dân	Farmer	Labor	35	Hi	med	no	NA	1	c	1	2	1	1	a	NA	a	1	borrow	NA	b	lịch sử việt nam để có 1 tâm hồn đẹp	yes	a	a	1	đắc nhân tâm chiên stranh và hòa bình
4764	16.631	43074	16	9	Female	8	1	0	0	2	3	1	b	giáo viên	Teacher	nông dân	Farmer	Labor	46	NA	nông dân	Farmer	Labor	NA	NA	med	no	NA	1	b	1	2	1	0	a	NA	a	1	borrow	d	a	truyện kiều cái dũng của thánh nhân	yes	a	a	1	why? tôi muốn biết vì sao bác sĩ tốt nhất là chính mình mười vạn câu hỏi vì sao
4767	16.634	43074	16	9	Female	8	1	0	0	1	2	1	b	luật sư	Lawyer	nông dân	Farmer	Labor	34	Hi	nông dân	Farmer	Labor	34	Hi	med	no	NA	1	b	1	2	3	0	a	NA	a	1	borrow	d	b	10 điều tạo nên số phận truyện kiều	yes	d	a	1	đắc nhân tâm tuổi trẻ đáng giá bao nhiêu why? tôi muốn biết vì sao
4772	16.639	43074	16	9	Male	8	1	0	0	5	5	1	a	giáo viên	Teacher	nông dân	Farmer	Labor	54	NA	nông dân	Farmer	Labor	46	NA	med	no	NA	1	b	1	1	1	0	a	NA	a	1	buy	a	a	khi con tim rung động truyện kiều	yes	d	a	1	đắc nhân tâm đời thay đổi khi chúng ta thay đổi nhật kí trong tù
4777	16.646	43074	16	9	Female	8	1	0	0	1	3	1	d	bác sĩ	Doctor	nông dân	Farmer	Labor	NA	UnderHi	công nhân	Worker	Labor	NA	UnderHi	rich	no	NA	1	b	1	3	2	0	e	NA	a	1	borrow	a	a	hạt giống tâm hồn sống mòn	yes	d	a	1	nhật kí trong tù dế mèn phiêu lưu kí đắc nhân tâm
4781	16.65	43074	16	9	Male	8	1	0	0	2	2	1	d	ca sĩ	Singer	nông dân	Farmer	Labor	NA	UnderHi	nông dân	Farmer	Labor	NA	UnderHi	poor	no	NA	1	c	1	1	1	0	d	NA	a	1	buy	d	c	chạm tới giấc mơ triết lí nhân sinh cuộc đời	yes	a	a	1	chạm tới giấc mơ hạt giống tâm hồn thám tử lừng danh conan
4785	16.655	43074	16	9	Female	8	1	0	0	2	2	1	e	thiết kế thời trang	Fashion designer	nông dân	Farmer	Labor	41	UnderHi	nông dân	Farmer	Labor	38	UnderHi	med	no	NA	0	a	0	1	2	0	a	NA	a	1	borrow	d	a	hạt giống tâm hồn tuổi trẻ đáng giá bao nhiêu	yes	c	a	1	đời thay đổi khi chúng ta thay đổi đắc nhân tâm tôi tài giỏi bạn cũng thế
4866	10.74	43075	5	6	Female	8	1	0	0	2	5	1	b	giáo viên	Teacher	xây dựng	Worker	Labor	34	NA	công nhân	Worker	Labor	33	NA	med	no	NA	1	c	1	3	3	1	a	NA	a	1	borrow	a	a	cơ thể chúng mình thật lạ kĩ năng dành cho học sinh	yes	b	a	1	cô bé lọ lem
4870	10.79	43075	5	6	Male	8	1	0	0	2	2	1	e	đầu bếp	Chef	Không xác định	NA	NA	NA	NA	công nhân	Worker	Labor	38	UnderHi	med	no	NA	1	a	0	1	2	0	d	NA	a	1	buy	b	b	100 phát minh làm nên lịch sử 2 vạn dặm dưới đáy biển	yes	b	a	1	conan thám tử lừng danh shin cậu bé bút chì truyện trinh thám
4938	7.335	43071	7	9	Male	8	1	0	0	2	2	1	a	Đầu bếp	Chef	Nông dân	Farmer	Labor	33	UnderHi	Giáo viên	Teacher	Intellectuals	41	Uni	med	no	NA	1	b	1	1	1	0	f	Truyện tranh	a	1	borrow	a	c	Conan Gửi thời thanh xuân tươi trẻ	yes	b	a	1	Khôn gia đình Tuổi thơ dữ dội Doraemon
4952	7.346	43071	7	9	Female	8	1	0	0	2	2	1	b	Luật sư	Lawyer	Nông dân	Farmer	Labor	47	Hi	Nông dân	Farmer	Labor	43	Hi	med	no	NA	0	b	1	2	2	0	a	NA	a	1	buy	d	b	Gửi thời thanh xuân đẹp đẽ đơn thuần Chào ngày mới	yes	a	a	1	Cho tôi xin một vé đi tuổi thơ Chào ngày ấy Thế giới mộng mơ
921	11.156	43071	11	8	Female	7.9	0	0	0	5	5	1	e	Giáo viên	Teacher	Nông dân	Farmer	Labor	52	UnderHi	Nông dân	Farmer	Labor	51	UnderHi	med	no	NA	1	c	1	1	2	0	a	NA	a	1	borrow	d	a	Kĩ năng sống dành cho học sinh Doraemon	yes	a	a	1	Thám tử lừng danh Conan Tấm Cám Danh nhân văn hóa thế giới
2992	8.57	43076	8	6	Female	7.9	0	0	0	2	3	1	e	Ca sĩ	Singer	Nông dân	Farmer	Labor	33	UnderHi	Nông dân	Farmer	Labor	33	UnderHi	rich	NA	NA	1	f	1	2	1	0	d	NA	a	1	borrow	a	d	Doraemon Những tấm lòng cao cả	yes	a	a	1	Doraemon Tý Quậy Cậu bé bút chì
2998	8.01	43076	8	6	Female	7.9	0	0	0	2	2	1	d	Giáo viên	Teacher	Bác sĩ	Doctor	Intellectuals	42	Uni	Giáo viên	Teacher	Intellectuals	41	Uni	rich	no	NA	1	a	0	1	1	0	b	NA	a	1	borrow	NA	b	Những ngày thơ ấu Những phát minh vĩ đại	yes	b	a	1	Harry Potter Sống bằng cả trái tim Con mèo dạy hải âu bay
3008	15.62	43071	15	6	Female	7.9	0	0	0	2	2	1	c	Ca sĩ	Singer	Nông dân	Farmer	Labor	39	Hi	Nông dân	Farmer	Labor	35	Hi	rich	no	NA	1	b	1	1	1	1	a	NA	a	1	buy	a	c	điểm tựa của niềm tin, hạt giống tâm hồn	yes	a	a	1	Doraemon, Conan, Shin cậu bé bút chì
3026	8.21	43076	8	6	Male	7.9	0	0	0	2	2	1	d	Youtuber	Public figure	Bộ đội	Soldier	Labor	50	PostGrad	Buôn bán	Seller	Labor	43	PostGrad	med	no	NA	1	f	1	1	1	0	f	Truyện tranh	a	1	buy	a	a	Hướng dẫn chơi rubic Doraemon	yes	b	a	1	Hướng dẫn chơi cầu lông Harry Potter Khoa học về động vật
3043	16.53	43074	16	6	Female	7.9	0	0	0	3	4	1	c	giáo viên	Teacher	làm ruộng	Farmer	Labor	45	Hi	làm ruộng	Farmer	Labor	43	Hi	rich	no	NA	1	a	0	3	1	0	f	sách ngoại ngữ	a	1	buy	d	a	các cách hay để cải thiện tiếng anh chiếc lá thuộc bài	yes	a	a	1	những cách học hay cách học từ vựng nhanh 150 bài văn
3088	16.421	43074	16	8	Male	7.9	0	0	0	1	3	1	c	Công an	Police officer	Nông dân	Farmer	Labor	43	UnderHi	Nông dân	Farmer	Labor	36	UnderHi	med	no	NA	1	e	1	1	1	NA	a	NA	a	1	borrow	a	b	Những câu chuyện về tấm gương Bác Hồ Đoraemon	yes	b	a	1	Conan Doraemon Shin
3262	3.38	43071	6	9	Female	7.9	0	0	0	1	2	1	d	Giáo viên	Teacher	Nông dân	Farmer	Labor	43	UnderHi	Giáo viên	Teacher	Intellectuals	39	Uni	med	no	NA	1	b	1	1	1	0	f	Truyện tranh	a	1	buy	a	d	Cậu bé bút chì Doraemon	yes	d	a	1	Truyện Kiều Bụi phấn Thế giới quanh ta
3407	16.585	43074	16	9	Female	7.9	0	0	0	2	3	1	a	bác sĩ	Doctor	nông dân	Farmer	Labor	41	NA	nông dân	Farmer	Labor	38	UnderHi	rich	no	NA	1	a	0	2	2	0	a	NA	a	1	buy	a	a	tắt đèn truyện ngắn vũ trọng phụng	yes	a	a	1	toán học 169 tài toán hay cho trẻ em và người lớn nghệ thuật ứng xử thông minh
3863	16.165	43074	16	7	Male	7.9	0	0	0	3	3	1	f	công an	Police officer	thợ xây	Worker	Labor	48	UnderHi	nông dân	Farmer	Labor	45	UnderHi	poor	yes	NA	1	f	1	2	3	0	c	NA	a	1	borrow	c	a	ánh sáng khoa học cuộc sống bí ẩn cơ thể người	yes	a	a	1	vượt ao tù ra biển lớn bí ẩn thiên nhiên về vũ trụ tìm hiểu về trái đất
3865	16.167	43074	16	7	Male	7.9	0	0	0	2	2	1	d	bộ đội	Soldier	nông dân	Farmer	Labor	37	UnderHi	nông dân	Farmer	Labor	36	Hi	med	yes	NA	1	b	1	2	2	0	a	NA	a	1	buy	a	a	10 vạn câu hỏi vì sao những tấm lòng cao cả	no	b	a	1	vượt ao tù ra biển lớn khám phá vũ trụ những kiến trúc cổ đại
3869	16.171	43074	16	7	Female	7.9	0	0	0	2	3	1	d	ca sĩ	Singer	tự do	Freelancer	Labor	44	NA	tự do	Freelancer	Labor	39	NA	rich	NA	NA	1	a	0	2	2	1	c	NA	a	1	borrow	b	a	bí ẩn cơ thể con người bí ẩn động vật thực vật	yes	NA	a	1	tôi là bê tô con chó mang giỏ hoa hồng thiên thần nhỏ của tôi
929	11.164	43071	11	8	Female	7.8	0	0	0	2	3	1	c	Thiết kế thời trang	Fashion designer	Nông dân	Farmer	Labor	43	UnderHi	Nông dân	Farmer	Labor	42	UnderHi	rich	no	NA	1	c	1	1	1	0	d	NA	a	1	borrow	a	a	Kĩ năng sống dành cho học sinh Tu dưỡng đạo đức	yes	a	a	1	Tấm Cám Sự tích dưa hấu Cô bé bán diêm
930	11.165	43071	11	8	Female	7.8	0	0	0	1	4	1	d	Ca sĩ	Singer	Nông dân	Farmer	Labor	37	Hi	Nông dân	Farmer	Labor	32	Hi	rich	no	NA	1	b	1	1	1	0	d	NA	a	1	borrow	a	c	Hạt giống tâm hồn Hãy lạc quan để vui sống	yes	a	a	1	Sự tích cây nêu ngày Tết Sơn Tinh Thủy Tinh Hướng dẫn nghề
1007	14.8	43071	14	7	Female	7.8	0	0	0	1	3	1	b	Giáo viên	Teacher	Tự do	Freelancer	Labor	38	Hi	Công nhân	Worker	Labor	34	PostGrad	med	no	NA	0	a	0	2	2	1	a	NA	a	1	borrow	d	b	Quà tặng cuộc sống Vượt lên số phận	yes	a	a	1	Chiếc lá thuộc bài Hạt giống tâm hồn Harry Potter
1111	14.145	43071	14	9	Female	7.8	0	0	0	2	2	1	b	Công an	Police officer	Nông dân	Farmer	Labor	51	Hi	Nông dân	Farmer	Labor	44	Hi	med	no	NA	1	b	1	1	1	0	d	NA	a	1	borrow	a	d	Tot-to-chan - Cô bé bên cửa sổ Không gia đình	yes	a	a	1	Truyện Kiều Nhật kí trong tù Bản án chế độ thực dân Pháp
1120	14.154	43071	14	9	Female	7.8	0	0	0	1	2	1	d	Bác sĩ	Doctor	Nông dân	Farmer	Labor	44	Hi	Giáo viên	Teacher	Intellectuals	40	Uni	med	yes	7000000-8000000	1	b	1	1	1	0	f	Truyện tranh	a	1	buy	a	c	Harry Potter Hai vạn dặm dưới đáy biển	yes	a	a	1	Sherlock Holmes Harry Potter Sự im lặng của bầy cừu
1298	1.127	43077	1	9	Female	7.8	0	0	0	5	5	1	d	Thợ trang điểm	Makeup artist	Nông dân	Farmer	Labor	59	Hi	Nông dân	Farmer	Labor	59	Hi	med	no	NA	1	b	1	3	2	0	d	NA	a	1	borrow	d	b	Hạt giống tâm hồn Thần đồng đất Việt	yes	b	a	1	Tý Quậy Cậu bé bút chì Cuộc đời của Pi
1363	7.41	43071	7	9	Female	7.8	0	0	0	2	3	0	b	Người mẫu	Model	Nông dân	Farmer	Labor	36	UnderHi	Nông dân	Farmer	Labor	35	UnderHi	med	no	NA	1	b	1	1	1	0	e	NA	a	1	borrow	NA	c	Hạt giống tâm hồn Thám tử lừng danh Conan	yes	d	a	1	Cậu bé bút chì Cừu vui vẻ và sói xám Khát vọng sống
1582	9.203	43073	9	NA	Female	7.8	0	0	0	3	4	1	d	Bác sĩ	Doctor	Làm ruộng	Farmer	Labor	48	Hi	Làm ruộng	Farmer	Labor	43	UnderHi	med	no	NA	0	b	1	2	2	0	a	NA	a	1	borrow	a	b	Tuổi thơ dữ dội Kể chuyện thần đồng	yes	a	a	1	Mười vạn câu hỏi vì sao Tắt Đèn Dế mèn phiêu lưu ký
1592	9.174	43073	9	8	Female	7.8	0	0	0	2	2	1	b	Bác sĩ	Doctor	Thợ xây	Worker	Labor	51	UnderHi	Công nhân giày da	Worker	Labor	46	UnderHi	med	no	NA	0	b	1	2	1	1	a	NA	a	1	borrow	a	a	Truyện ngắn Nam Cao Những oan hồn tháng 7	yes	a	a	1	Mẹ là điều kì diệu nhất Con mơ điều giản dị Bao giờ cho đến ngày xưa
1647	9.25	43073	9	8	Female	7.8	0	0	0	2	2	1	b	Bác sĩ	Doctor	Công nhân	Worker	Labor	43	Hi	Công nhân	Worker	Labor	42	Hi	med	no	NA	1	e	1	2	1	1	a	NA	a	1	borrow	b	a	Tôi thấy hoa vàng trên cỏ xanh Truyện Kiều	yes	c	a	1	Dế mèn phiêu lưu ký Tắt Đèn Tấm gương đạo đức Hồ Chí Minh
2874	16.334	43074	16	8	Male	7.8	0	0	0	3	3	1	a	Công nghệ thông tin	Engineer	Xây dựng	Worker	Labor	47	UnderHi	Công nhân	Worker	Labor	43	Hi	med	no	NA	1	e	1	1	1	1	d	NA	a	1	borrow	c	a	Truyện cười Doraemon	yes	c	a	1	Truyện cười Doraemon 10 vạn câu hỏi vì sao
2973	8.38	43076	8	6	Female	7.8	0	0	0	2	2	1	a	Bác sĩ	Doctor	Nông dân	Farmer	Labor	45	UnderHi	Nông dân	Farmer	Labor	37	Hi	med	NA	NA	1	a	0	2	1	1	a	NA	a	1	borrow	b	b	Kĩ năng sống Doraemon	yes	a	a	1	Quê nội Sinh học lí thú Những kì tích y học
2977	8.42	43076	8	6	Male	7.8	0	0	0	1	1	1	c	Hướng dẫn viên du lịch	Tour guide	Công Nhân	Worker	Labor	NA	Hi	Công nhân	Worker	Labor	NA	Hi	med	yes	NA	1	a	0	2	1	0	c	NA	a	1	borrow	d	a	Sự thật kinh hoàng về thời gian Doraemon	yes	d	a	1	Chất độc nhức xương Hạt giống tâm hồn Kĩ năng sống
3089	16.422	43074	16	8	Male	7.8	0	0	0	3	3	1	f	Công an	Police officer	Nông dân	Farmer	Labor	52	UnderHi	Nông dân	Farmer	Labor	47	Hi	med	no	NA	1	b	1	1	2	0	b	NA	a	1	buy	d	b	Thánh gióng Thạch sanh	yes	c	a	1	Doraemon Shin Conan
3108	16.441	43074	16	8	Female	7.8	0	0	0	1	3	1	b	Giáo viên	Teacher	Nông dân	Farmer	Labor	34	UnderHi	Nông dân	Farmer	Labor	32	UnderHi	med	no	NA	1	b	1	1	1	0	f	Truyện tranh	a	1	buy	d	a	Conan Shin	yes	d	a	1	Conan Doraemon Shin
3118	3.04	43071	6	9	Female	7.8	0	0	0	2	3	1	b	Nhà Báo	Journalist	Nông dân	Farmer	Labor	42	Hi	Nông dân	Farmer	Labor	41	UnderHi	rich	no	NA	1	a	0	2	3	1	d	NA	a	1	borrow	b	a	Còn chút gì để nhớ Bỉ vỏ	NA	c	a	1	Tôi thấy hoa vàng trên cỏ xanh Ngày xưa có một chuyện tình Thiên thần nhỏ của tôi
3132	3.19	43071	6	9	Female	7.8	0	0	0	1	3	1	e	Kinh doanh	Businessman	Thợ xây	Worker	Labor	41	UnderHi	Nông dân	Farmer	Labor	35	UnderHi	poor	no	NA	1	b	1	1	1	0	c	NA	a	1	borrow	a	b	Còn chút gì để nhớ Nhân ái bao dung	yes	a	a	1	Chúc một ngày tốt lành Thằng quỷ nhỏ Nữ sinh
3136	3.23	43071	6	9	Female	7.8	0	0	0	2	2	1	b	Kinh doanh	Businessman	Nông dân	Farmer	Labor	42	Hi	Nông dân	Farmer	Labor	42	UnderHi	med	no	NA	1	f	1	2	2	1	a	NA	a	1	borrow	d	a	Còn chút gì để nhớ Nhật kí chú bé nhút nhát	yes	d	a	1	dế Mèn Út Quyên và tôi Cho tôi xin một vé đi tuổi thơ
3621	16.111	43074	16	6	Female	7.8	0	0	0	2	3	1	a	giáo viên	Teacher	làm ruộng	Farmer	Labor	40	UnderHi	làm ruộng	Farmer	Labor	36	UnderHi	med	yes	NA	1	c	1	2	2	1	e	NA	a	1	buy	a	a	169 bài toán hay cho trẻ em và người lớn những câu chuyện khuyến khích trẻ say mê học hỏi	yes	a	a	1	ba ngày nước tí hon bài tập số học và đại số chọn lọc cho học sinh THCS tìm số thất lạc
3759	15.208	43071	15	8	Female	7.8	0	0	0	2	2	1	d	Luật sư	Lawyer	Nông dân	Farmer	Labor	44	Hi	Nông dân	Farmer	Labor	44	Hi	med	no	NA	1	b	1	2	2	0	d	NA	a	1	borrow	d	a	Kỹ năng nói, hãy đặt trách nhiệm lên vai	yes	c	a	1	Tiểu thuyết: Tam sinh tam thê thập lý đào hoa, Thần thoại Hy Lạp, Dế mèn phưu lưu ký
3817	3.168	43071	6	7	Female	7.8	0	0	0	3	3	1	d	Họa sĩ	Painter	Nông dân	Farmer	Labor	NA	Hi	Nông dân	Farmer	Labor	NA	Hi	med	no	NA	1	b	1	1	1	0	f	Truyện tranh	a	1	gift	a	a	Cậu bé bút chì Conan	yes	a	a	1	Cậu bé bút chì Conan Doraemon
3830	3.181	43071	6	7	Female	7.8	0	0	0	1	2	1	d	Đầu bếp	Chef	Thợ xây	Worker	Labor	39	Hi	Giáo viên	Teacher	Intellectuals	37	Uni	med	no	NA	1	f	1	2	1	0	f	Nấu ăn	a	1	buy	a	a	Những món ăn ngon dễ làm Cách làm món ăn ngon ở miền Bắc	yes	a	a	1	1000 câu hỏi vì sao Những cánh buồm đỏ Những truyện hay dành cho thiếu nhi
4150	3.222	43071	6	7	Female	7.8	0	0	0	2	2	1	e	Giáo viên	Teacher	Nông dân	Farmer	Labor	46	UnderHi	Nông dân	Farmer	Labor	44	Hi	med	NA	NA	1	a	0	2	2	0	a	NA	a	1	borrow	b	a	Doraemon Conan	yes	d	a	1	Conan Doraemon Cậu bé bút chì
4162	3.234	43071	6	6	Male	7.8	0	0	0	1	2	1	f	Kĩ sư	Engineer	Giáo viên	Teacher	Intellectuals	40	Uni	Giáo viên	Teacher	Intellectuals	37	Uni	med	no	NA	1	d	1	2	2	1	f	Khoa học kĩ thuật	a	1	buy	a	a	Động vật Kĩ thuật	no	NA	a	1	Thế giới động vật 150 bài toán học Dế Mèn
4278	10.281		5	8	Female	7.8	0	0	0	3	5	1	c	hướng dẫn viên	Tour guide	nông dân	Farmer	Labor	42	UnderHi	nông dân	Farmer	Labor	37	UnderHi	med	no	NA	1	b	1	2	2	0	a	NA	a	1	borrow	d	b	hoàng tử bé hạt giống tâm hồn	yes	c	a	1	3 ngày ở vương quốc tí hon truyện ngắn ngô tất tố truyện cổ andecxen
4376	10.341	43074	5	8	Female	7.8	0	0	0	2	3	0	d	công an	Police officer	xây dựng	Worker	Labor	39	UnderHi	công nhân	Worker	Labor	36	UnderHi	rich	no	NA	1	b	1	1	1	0	d	NA	a	1	borrow	c	d	học ăn học nói học gói học mở hạt giông staam hồn	yes	b	a	1	NA
4535	15.313	43071	15	9	Female	7.8	0	0	0	2	2	1	d	Bác sĩ	Doctor	Nông dân	Farmer	Labor	46	UnderHi	Nông dân	Farmer	Labor	45	UnderHi	med	no	NA	1	f	1	2	1	1	d	NA	a	1	borrow	a	a	hạt giống tâm hồn, bụi phấn	yes	c	a	1	nghệ thuật giao tiếp thông minh, kỹ năng sống biết lựa chọn, Tản Đà thơ
4538	15.316	43071	15	9	Female	7.8	0	0	0	1	3	1	e	Bác sĩ	Doctor	Nông dân	Farmer	Labor	41	Hi	Nông dân	Farmer	Labor	35	Hi	NA	yes	NA	1	f	1	2	2	0	f	Ngoại ngữ	a	1	buy	d	a	bầu trời sụp đổ, nếu còn có ngày mai	yes	a	a	1	hạt giống tâm hồn, kỹ năng sống biết lựa chọn, tôi muốn biết ở đâu
4548	15.327	43071	15	9	Female	7.8	0	0	0	1	2	NA	d	đầu bếp	Chef	Nông dân	Farmer	Labor	42	UnderHi	Công nhân	Worker	Labor	39	UnderHi	med	no	NA	0	c	1	1	1	0	a	NA	a	1	borrow	a	a	tâm lý và sinh lý, hạt giống tâm hồn	yes	b	a	1	Kỹ năng sống dành cho học sinh, kỹ năng giao tiếp, truyện kiều
4569	16.211	43074	16	7	Female	7.8	0	0	0	1	2	1	d	bác sĩ	Doctor	làm ruộng	Farmer	Labor	35	Hi	làm ruộng	Farmer	Labor	33	Hi	poor	no	NA	0	d	1	2	2	0	d	NA	a	1	borrow	d	a	không gian vũ trụ học cách làm việc	yes	d	a	1	chắp cánh ước mơ học cách học tập học cách làm người
4592	16.222	43074	16	7	Female	7.8	0	0	0	1	3	1	b	không xác định	NA	làm ruộng	Farmer	Labor	NA	Hi	công nhân	Worker	Labor	NA	UnderHi	med	no	NA	0	a	0	2	2	0	b	NA	a	1	borrow	d	a	những điều lạ mà em muốn biết túp lều bác tôm	yes	a	a	1	NA
571	9.094	43073	9	7	Female	7.75	0	0	0	1	0	1	c	Giáo viên	Teacher	giáo viên	Teacher	Intellectuals	41	Uni	Giáo viên	Teacher	Intellectuals	40	Uni	med	no	NA	1	b	1	1	1	0	d	NA	a	1	borrow	a	c	Lịch sử Việt Nam 55 cách tranh luận hiệu quả	yes	a	a	1	TRuyện kể về Lòng nhân đức Lòng khoan dung sống tự lập
3273	3.49	43071	6	9	Female	7.75	0	0	0	3	3	1	e	Bác sĩ	Doctor	Nông dân	Farmer	Labor	43	UnderHi	Nông dân	Farmer	Labor	40	UnderHi	med	no	NA	0	c	1	1	1	1	e	NA	a	1	buy	d	NA	Cậu bé bút chì Doraemon	yes	a	a	1	Truyện kiều hồn về trong gió Nguyễn Nhật Ánh
3504	3.106	43071	6	8	Male	7.75	0	0	0	3	3	1	d	Hướng dẫn viên du lịch	Tour guide	Thợ xây	Worker	Labor	49	NA	Nông dân	Farmer	Labor	47	NA	med	no	NA	1	e	1	2	1	0	f	Truyện tranh	a	1	borrow	b	b	Cậu bé bút chì Học tiếng Anh cùng sách song ngữ	NA	a	a	1	Khám phá tự nhiên thiên nhiên 10 vạn câu hỏi vì sao 1000 câu hỏi đường lên đỉnh olympia
1114	14.148	43071	14	9	Male	7.7	0	0	0	2	2	1	b	Tài xế	Driver	Tiểu thương	Businessman	Labor	46	Hi	Tiểu thương	Businessman	Labor	41	Hi	med	no	NA	1	f	1	1	1	0	e	NA	a	1	borrow	a	c	Nanh trắng Tuổi thơ dữ dội	yes	a	a	1	Truyện Kiều Bản án chế độ thực dân Pháp Nhật kí trong tù
1220	1.24	43077	1	6	Male	7.7	0	0	0	2	7	1	c	Ca sĩ	Singer	Nông dân	Farmer	Labor	64	UnderHi	Nông dân	Farmer	Labor	52	UnderHi	med	no	NA	1	b	1	1	1	0	d	NA	a	1	buy	a	c	Sách học hát Ô Long viện	yes	d	a	1	Ô Long viện Từ điển thực vật Từ điển động vật
1247	1.109	43077	1	8	Female	7.7	0	0	0	1	2	1	d	Phiên dịch viên	Interpreter	Thủy nông	Farmer	Labor	35	Hi	Giáo viên	Teacher	Intellectuals	35	PostGrad	rich	yes	10000000	1	b	1	2	1	1	e	NA	a	1	borrow	b	a	Hãy lạc quan để vui sống Tôi muốn biết về mọi thứ	yes	a	a	1	Từ điển tiếng Anh Truyện dân gian thế giới Truyện cổ tích thế giới
1325	1.155	43077	1	9	Male	7.7	0	0	0	2	2	1	f	Nông dân	Farmer	Nông dân	Farmer	Labor	44	Hi	Nông dân	Farmer	Labor	40	Hi	med	no	NA	1	c	1	2	1	0	a	NA	a	1	buy	b	a	Tâm lí và sinh lí Toán học và nghệ thuật	yes	c	a	1	Cuộc đời của Pi Giảng văn văn học Việt Nam Câu chuyện khoa học
1561	9.17	43073	9	7	Female	7.7	0	0	0	2	2	1	b	NA	NA	Làm ruộng	Farmer	Labor	42	UnderHi	Làm ruộng	Farmer	Labor	36	UnderHi	med	no	NA	1	b	1	1	1	1	a	NA	a	1	borrow	a	a	Kỹ năng giao tiếp đối với học sinh Quà tặng cuộc sống	yes	d	a	1	Doraemon Câu đố Việt nam Shin - Cậu bé bút chì
2949	16.394	43074	16	8	Female	7.7	0	0	0	1	3	1	b	Kế toán	Accountant	Nông dân	Farmer	Labor	37	UnderHi	Nông dân	Farmer	Labor	36	UnderHi	med	no	NA	1	a	0	1	1	0	a	NA	a	1	borrow	a	a	Nội trợ gia đình Sách về thế giới cổ tích	yes	a	a	1	Truyện cổ tích Sách nấu ăn Mẹo làm đẹp
2963	16.405	43074	16	8	Female	7.7	0	0	0	2	3	1	d	Nhà khảo cổ học	Scientist	Nông dân	Farmer	Labor	44	UnderHi	Nông dân	Farmer	Labor	40	UnderHi	med	no	NA	1	f	1	2	3	0	f	Sinh học	a	1	borrow	b	a	Khám phá kì quan thế giới Khám phá rừng	yes	a	a	1	Thời Trung cổ Người Hy Lạp huyền thoại Người Ai Cập
3497	3.99	43071	6	8	Female	7.7	0	0	0	1	3	1	b	Nhà Văn	Writer	Sửa xe	Worker	Labor	41	UnderHi	Buôn bán	Seller	Labor	35	UnderHi	med	yes	NA	1	c	1	2	2	1	a	NA	a	1	borrow	d	b	Những tâm hồn cao thượng Hoàng tử bé	yes	c	a	1	Những câu chuyện dân gian Việt Nam kì thú 150 bài làm văn hay Sách thưởng thức âm nhạc
3554	3.117	43071	6	8	Female	7.7	0	0	0	3	3	1	e	Bộ đội	Soldier	Thợ xây	Worker	Labor	48	UnderHi	Nông dân	Farmer	Labor	47	UnderHi	rich	no	NA	1	c	1	2	1	0	f	Lịch sử Việt Nam	a	1	buy	a	a	Ngữ Pháp Tiếng Anh Vật lý lí thú	yes	c	a	1	Tình cha ấm áp Hành trang cuộc sống Bài học vô giá
4020	10.123	43074	5	6	Female	7.7	0	0	0	1	2	1	b	công ti	Businessman	thợ xây	Worker	Labor	33	UnderHi	công nhân	Worker	Labor	31	Hi	med	no	NA	1	c	1	1	1	NA	a	NA	a	1	gift	b	a	ông gió bà mưa thật thà	NA	NA	a	1	tấm cám cây khế nàng bạch tuyết và 7 chú lùn
4280	10.283		5	8	Male	7.7	0	0	0	4	4	1	d	công an	Police officer	nông dân	Farmer	Labor	44	Hi	nông dân	Farmer	Labor	40	UnderHi	med	no	NA	1	b	1	1	1	0	d	NA	a	1	borrow	d	b	truyện ngắn nam cao học kĩ năng nói	yes	NA	a	1	truyện ngắn ngô tất tố truyện cổ andecxen chiến tranh và hào bình
1021	9.119	43073	9	7	Male	7.6	0	0	0	1	2	1	a	Công an	Police officer	Làm thợ	Worker	Labor	41	UnderHi	Công nhân	Worker	Labor	32	Uni	med	no	NA	1	e	1	2	1	0	e	NA	a	1	borrow	b	a	100 khám phá khoa học vĩ đại nhất mọi thời đại Lịch sử Việt nam	yes	a	a	1	Thuyền trưởng đơn vị VIệt nam sử lược Núi lửa nóng hơn lửa
1032	9.137	43073	9	7	Female	7.6	0	0	0	2	3	1	d	huấn luyện thể thao	Trainer	Làm thợ	Worker	Labor	39	UnderHi	nội trợ	Unemployed	Labor	36	UnderHi	med	no	NA	1	b	1	1	2	0	e	NA	a	1	borrow	a	a	Gió lạnh đầu mùa Quà tặng cuộc sống	NA	a	a	1	Cánh buồm đỏ thắm Thuyền trưởng đơn vị Việt nam sơ lược
1119	14.153	43071	14	9	Male	7.6	0	0	0	1	2	1	a	Công an	Police officer	Tài xế	Driver	Labor	39	Hi	Giáo viên	Teacher	Intellectuals	38	Uni	med	no	NA	1	a	0	2	1	1	b	NA	a	1	borrow	d	b	Tuổi thơ dữ dội Không gia đình	NA	a	a	1	Truyện Kiều Hai vạn dặm dưới đáy biển Hạt giống tâm hồn
2055	2.193	43076	4	8	Female	7.6	0	0	0	2	2	1	b	Giáo viên	Teacher	Nông dân	Farmer	Labor	45	Hi	Nông dân	Farmer	Labor	44	Hi	med	yes	NA	1	b	1	1	3	1	a	NA	a	1	borrow	a	a	Kính vạn hoa Con mèo dạy hải âu bay	yes	a	a	1	Trên sa mạc và trong rừng thẳm Dế mèn phiêu lưu kí Con không ngốc con chỉ thông minh theo cách khác
2368	16.05	43074	16	6	Male	7.6	0	0	0	2	2	1	a	tiến sỹ	Scientist	làm nông	Farmer	Labor	43	UnderHi	làm nông	Farmer	Labor	36	UnderHi	med	no	NA	NA	a	0	2	3	1	d	NA	a	1	buy	c	c	Kỹ năng chơi bóng rổ Biết chấp nhận	yes	b	a	1	Những phát minh vĩ đại Shin cậu bé bút chì Doremon chú mèo máy đến từ tương lai
2427	16.29	43074	16	6	Female	7.6	0	0	0	2	3	1	b	giáo viên	Teacher	làm ruộng	Farmer	Labor	42	UnderHi	làm ruộng	Farmer	Labor	39	Hi	med	NA	NA	1	b	1	2	1	NA	a	NA	a	1	borrow	d	a	doraemon học cách học tập	yes	a	a	1	conan học cách làm người những phát kiến mới
2511	16.4	43074	16	6	Male	7.6	0	0	0	2	2	1	f	kĩ sư	Engineer	làm ruộng	Farmer	Labor	44	UnderHi	làm ruộng	Farmer	Labor	40	UnderHi	med	no	NA	1	e	1	1	1	0	f	truyện cười	a	1	borrow	a	c	những kì tích y học hướng tới tương lai	no	d	a	1	phát minh công nghệ cao các nhà phát minh vĩ đại không gian vũ trụ
3007	8.08	12/07/22017	8	6	Female	7.6	0	0	0	2	2	1	a	Công an	Police officer	Nông dân	Farmer	Labor	45	PostGrad	Nông dân	Farmer	Labor	40	PostGrad	med	no	NA	1	f	1	1	1	1	b	NA	a	1	borrow	d	a	Không gia đình Tấm lòng vàng của Emily	yes	d	a	1	Hướng dẫn chơi rubic Câu đố dân gian Trạng Quỳnh
3018	8.13	43076	8	6	Male	7.6	0	0	0	1	2	1	a	Giáo viên	Teacher	Công Nhân	Worker	Labor	36	UnderHi	Nông dân	Farmer	Labor	32	UnderHi	med	yes	7000000-10000000	1	c	1	2	3	0	e	NA	a	1	borrow	d	d	Sử ta kể lại Miền cực lạnh cóng	yes	c	a	1	Harry Potter và bảo bối tử thần Cậu bé karate Ngôi nhà ma ám
3101	16.434	43074	16	8	Female	7.6	0	0	0	1	2	1	c	Kế toán	Accountant	Nông dân	Farmer	Labor	39	UnderHi	Nông dân	Farmer	Labor	37	UnderHi	rich	no	NA	1	e	1	2	2	0	a	NA	a	1	borrow	a	a	Không gia đình Doraemon	yes	a	a	1	Chuyện cổ tích Việt Nam Tí quậy Thần đồng đất Việt
3559	3.12	43071	6	8	Male	7.6	0	0	0	1	2	1	f	Kĩ sư	Engineer	Thợ xây	Worker	Labor	41	UnderHi	Nông dân	Farmer	Labor	32	NA	med	no	NA	1	c	1	1	1	1	b	NA	a	1	buy	b	a	Kĩ năng sống Hãy lạc quan để vui sống	yes	b	a	1	10 phút tự học Tiếng Anh 236 bài luận mẫu tiếng Anh Sổ tay người nói tiếng Anh
3825	3.176	43071	6	7	Male	7.6	0	0	0	2	2	1	d	Cầu thủ bóng đá	Footballer	Nông dân	Farmer	Labor	NA	UnderHi	Nông dân	Farmer	Labor	NA	UnderHi	poor	yes	NA	1	c	1	2	1	0	a	NA	a	1	borrow	a	a	Tắt đèn Cho đi là còn mãi	yes	b	a	1	Đại Việt sử kí toàn thư Nghìn lẻ một đêm Chúc một ngày tốt lành
3988	16.199	43074	16	7	Female	7.6	0	0	0	1	3	1	c	cô giáo	Teacher	thợ xây	Worker	Labor	35	UnderHi	làm ruộng	Farmer	Labor	31	UnderHi	med	no	NA	0	a	0	2	2	0	a	NA	a	1	borrow	a	b	học cách làm việc những điều lạ em muốn biết	yes	b	a	1	học cách học tập học cách ứng xử học cách làm người
4021	10.124	43074	5	6	Male	7.6	0	0	0	2	2	1	b	công an	Police officer	hàn	Worker	Labor	40	UnderHi	công nhân	Worker	Labor	35	UnderHi	med	yes	14000000-15000000	1	c	1	1	2	1	d	NA	a	1	buy	a	a	câu khế tấm cám	yes	d	a	1	thật thà yêu thương kiên trì
4178	3.25	43071	6	6	Female	7.6	0	0	0	3	3	1	b	Y tá	Nurse	Nông dân	Farmer	Labor	49	Hi	Công nhân	Worker	Labor	43	UnderHi	med	no	NA	1	b	1	2	2	0	d	NA	a	1	borrow	d	a	Bang! Loài người đã xuất hiện như thế nào? Văn học	yes	d	a	1	Lớp học bồ câu Thần đồng đất Việt Truyện cười
4533	15.31	43071	15	9	Female	7.6	0	0	0	2	5	1	b	Bộ đội	Soldier	Nông dân	Farmer	Labor	42	UnderHi	Nông dân	Farmer	Labor	38	UnderHi	med	no	NA	0	a	0	2	1	0	f	truyện tranh	a	1	borrow	a	a	conan, hạt giống tâm hồn	yes	b	a	1	cút bắt tình yêu, kỹ năng sống: biết lựa chọn, biết quan tâm
4545	15.323	43071	15	9	Female	7.6	0	0	0	1	3	1	c	Diễn viên	Actor	Công nhân	Worker	Labor	33	UnderHi	Công nhân	Worker	Labor	33	UnderHi	med	no	NA	0	b	1	1	1	0	d	NA	a	1	borrow	a	d	hạt giống tâm hồn, kỹ năng sống dành cho học sinh	yes	b	a	1	Shin, Thần đồng đất việt, ô long viện
4581	16.221	43074	16	7	Female	7.6	0	0	0	2	3	1	f	công ti điện tử	Engineer	thợ xây	Worker	Labor	NA	UnderHi	làm ruộng	Farmer	Labor	NA	UnderHi	med	no	NA	1	d	1	2	1	0	d	NA	a	1	borrow	d	a	say mê học hỏi ứng xử giao tiếp	yes	d	a	1	học cách làm việc tình cha ấm áp những điều em muốn biết
16	6234	43074	3	9	Female	7.5	0	0	0	2	3	1	e	Công an	Police officer	Làm ruộng	Farmer	Labor	43	UnderHi	Làm ruộng	Farmer	Labor	39	Hi	med	no	NA	1	b	1	2	2	1	b	NA	a	1	buy	b	a	Conan Quà tặng cuộc sống	yes	c	a	1	Tắt đèn Bỉ vỏ Truyện Kiều
47	34	43075	2	8	Female	7.5	0	0	0	3	3	1	d	công nhân	Worker	làm ruộng	Farmer	Labor	52	UnderHi	làm ruộng	Farmer	Labor	50	UnderHi	med	no	NA	1	b	1	1	1	0	c	NA	a	1	buy	d	c	Đô rê mon Cô nan	yes	d	a	1	Truyện cười Truyện dân gian Nghìn lẻ một đêm
128	132	43104	3	8	Female	7.5	0	0	0	1	4	1	a	Ca sĩ	Singer	Công nhân	Worker	Labor	34	Hi	Công nhân	Worker	Labor	35	Hi	med	yes	20000000	1	b	1	2	2	1	d	NA	a	1	buy	a	a	Tắt đèn Những ngày thơ ấu	yes	a	a	1	Dế Mèn phiêu lưu kí Trạng Quỳnh Truyện cười dân gian Việt Nam
130	133	43104	3	8	Male	7.5	0	0	0	2	2	0	a	Nhạc sĩ	Songwriter	Cán bộ	Public servant	Intellectuals	43	Uni	Kinh doanh	Businessman	Labor	43	Hi	med	no	10000000	1	b	1	1	1	0	d	NA	a	1	borrow	d	c	Tắt đèn Trạng Quỳnh	yes	b	a	1	Những ngày thơ ấu Dế Mèn phiêu lưu ký Doraemon
139	79	43075	2	9	Male	7.5	0	0	0	4	4	1	f	ca sĩ	Singer	làm ruộng	Farmer	Labor	50	UnderHi	làm ruộng	Farmer	Labor	47	UnderHi	med	no	NA	1	b	1	1	1	1	d	NA	a	1	buy	d	d	Truyện cổ tích Truyện dân gian Việt nam	yes	d	a	1	NA
154	143	43104	3	8	Male	7.5	0	0	0	2	3	1	f	Kĩ sư	Engineer	Làm ruộng	Farmer	Labor	42	Hi	Làm ruộng	Farmer	Labor	36	UnderHi	rich	yes	10000000	1	b	1	2	2	1	a	NA	a	1	borrow	a	c	Doraemon 7 viên ngọc rồng	yes	c	a	1	Hán Sở tranh hùng Truyện cười dân gian Việt Nam Những mẩu chuyện vui về các nhà khoa học trên thế giới
196	164	43083	3	8	Male	7.5	0	0	0	2	2	1	f	Đầu bếp	Chef	Công nhân	Worker	Labor	42	UnderHi	Công nhân	Worker	Labor	39	Hi	med	no	NA	1	a	0	1	2	0	c	NA	a	1	buy	c	b	Hướng dẫn nấu ăn Học tin học	yes	a	a	1	Tắt đèn Đất Việt Conan
283	190	43074	3	8	Female	7.5	0	0	0	1	3	1	e	Chưa xác định	NA	Làm ruộng	Farmer	Labor	41	Hi	Làm ruộng	Farmer	Labor	38	UnderHi	med	no	NA	1	b	1	2	1	1	b	NA	a	1	borrow	a	a	Sự kiện lịch sử chấn động thế giới Thơ văn tinh hoa của chủ tịch Hồ Chí Minh	yes	d	a	1	Đạo đức của chủ tịch Hồ Chí Minh Những sự kiện lịch sử hay của thế giới Cách sửa đổi của chủ tịch Hồ Chí Minh
320	4.201	43075	2	7	Male	7.5	0	0	0	3	3	1	f	nhà văn	Writer	kinh doanh	Businessman	Labor	43	UnderHi	làm ruộng	Farmer	Labor	43	UnderHi	med	yes	NA	1	f	1	1	1	0	f	Truyện tranh	a	1	borrow	a	c	đô rê mon bảy viên ngọc rồng	yes	d	a	1	Sách tìm hiểu khoa học Truyện cổ tích One piece
440	4.322	43075	2	8	Male	7.5	0	0	0	3	3	0	NA	Vận động viên	Athlete	Làm ruộng	Farmer	Labor	44	Hi	Công nhân	Worker	Labor	38	UnderHi	med	no	NA	0	e	1	1	1	0	e	NA	a	1	borrow	a	a	Cô nan Shin cậu bé bút chì	yes	c	a	1	Tấm Cám Đô rê mon Cổ tích
512	9.033	43073	9	6	Female	7.5	0	0	0	2	3	1	a	Công an	Police officer	công an	Police officer	Labor	43	UnderHi	giáo viên	Teacher	Intellectuals	37	Uni	med	yes	NA	1	a	0	2	1	0	e	NA	a	1	borrow	b	a	Quà tặng cuộc sống Lắng nghe hay nhận một viên đá	yes	b	a	1	Những kỳ tích y học Sherlock Homes Harry porter
745	11.117	43071	11	7	Female	7.5	0	0	0	1	1	0	NA	Bác sĩ	Doctor	Làm ruộng	Farmer	Labor	36	UnderHi	Công nhân	Worker	Labor	34	UnderHi	med	no	NA	1	b	1	1	1	0	a	NA	a	1	borrow	d	b	Sách lịch sử Sách phổ biến khoa học	yes	b	a	1	Cấu trúc tiếng Anh Lịch sử thế giới Sách danh nhân
782	14.03	43071	14	6	Female	7.5	0	0	0	2	4	1	b	bác sĩ	Doctor	Làm ruộng	Farmer	Labor	41	Hi	Làm ruộng	Farmer	Labor	38	Hi	med	no	NA	1	b	1	1	1	0	d	NA	a	1	borrow	d	a	Nghệ thuật	yes	a	a	1	NA
810	14.31	43071	14	6	Male	7.5	0	0	0	1	5	1	f	Nhà khoa học	Scientist	Đốt lò	Worker	Labor	35	PostGrad	Công ty giầy da	Businessman	Labor	34	PostGrad	med	no	NA	1	a	0	3	3	0	c	NA	a	1	buy	c	c	Khoa học Sinh học	yes	a	a	1	Khoa học tự nhiên và xã hội Sinh học Truyện dân gian Việt Nam và thế giới
835	9.117	43073	9	7	Female	7.5	0	0	0	2	3	1	NA	Nghiên cứu khoa học	Scientist	làm ruộng	Farmer	Labor	41	UnderHi	Làm ruộng	Farmer	Labor	36	UnderHi	med	no	NA	1	d	1	2	2	1	d	NA	a	1	buy	a	a	Hạt giống tâm hồn 55 cách chọn trang phục	yes	c	a	1	Danh tướng Lý Thường kiệt Truyện cổ tích Việt Nam Có trái tim yêu thương
920	11.155	43071	11	8	Male	7.5	0	0	0	4	4	1	b	Ca sĩ	Singer	Nông dân	Farmer	Labor	46	UnderHi	Nông dân	Farmer	Labor	44	UnderHi	med	no	NA	1	c	1	2	1	1	a	NA	a	1	buy	a	c	Hạt giống tâm hồn Doraemon	yes	a	a	1	Doraemon Alibaba và 40 tên cướp Tấm Cám
975	11.37	43071	11	6	Male	7.5	0	0	0	2	2	1	c	Bác sĩ	Doctor	Không xác định	NA	NA	NA	NA	Nông dân	Farmer	Labor	41	UnderHi	rich	yes	NA	1	b	1	2	2	0	d	NA	a	1	borrow	a	a	Thám hiểm Doraemon	yes	a	a	1	Thám tử lừng danh Conan Doraemon Cậu bé bút chì
1019	9.12	43073	9	7	Female	7.5	0	0	0	3	3	1	b	Bác sĩ	Doctor	Làm thợ	Worker	Labor	51	UnderHi	làm thợ	Worker	Labor	52	UnderHi	med	no	NA	1	e	1	1	1	0	e	NA	a	1	borrow	d	d	Gió lạnh đầu mùa Quà tặng cuộc sống : Mẹ sẽ không lạnh nữa	yes	a	a	1	Còn chút gì để sống 500 câu chuyện đạo đức:Tình cha, tình yêu thương
1067	14.101	43071	14	8	Female	7.5	0	0	0	2	2	1	e	Công an	Police officer	Tài xế	Driver	Labor	47	PostGrad	Bác sĩ	Doctor	Intellectuals	45	PostGrad	med	yes	NA	1	f	1	2	2	1	d	NA	a	1	borrow	d	c	Lịch sử nước nhà Những quy định về trường đại học: Học viện An ninh	yes	a	a	1	Ngữ pháp tiếng Anh Chuyện về tình bạn Chuyện về lịch sử thời xưa
1075	14.109	43071	14	8	Male	7.5	0	0	0	3	3	1	f	Ngân hàng	Banker	Thợ xây	Worker	Labor	52	UnderHi	Tiểu thương	Businessman	Labor	48	Hi	med	no	NA	1	b	1	2	3	0	d	NA	a	1	buy	a	d	Quà tặng cuộc sống Không gia đình	yes	b	a	1	Hạt giống tâm hồn Thám tử lừng danh Conan Truyện Kiều
1122	14.156	43071	14	9	Male	7.5	0	0	0	3	3	1	e	Bộ đội	Soldier	Nông dân	Farmer	Labor	63	Hi	Nông dân	Farmer	Labor	60	Hi	med	no	NA	1	f	1	2	1	0	a	NA	a	1	borrow	a	c	Tắt đèn Mèo Đen	yes	a	a	1	Hạt giống tâm hồn Truyện Kiều
1134	14.168	43071	14	9	Male	7.5	0	0	0	1	2	1	d	Không xác định	NA	Công nhân	Worker	Labor	36	Hi	Công nhân	Worker	Labor	36	Hi	med	no	NA	1	b	1	1	1	0	c	NA	a	1	buy	d	a	Mẹo nhỏ 7 chiến lược học tập thay đổi tương lai	yes	a	a	1	Tắt đèn Bí quyết thành công trên đường đời Tuyển tập thơ Nguyễn Du
1228	1.89	43077	1	8	Female	7.5	0	0	0	5	5	1	a	Giáo viên	Teacher	Nông dân	Farmer	Labor	49	UnderHi	Nông dân	Farmer	Labor	47	UnderHi	med	no	NA	1	b	1	2	2	0	a	NA	a	1	borrow	b	b	Hóa học lí thú Truyện ngắn Nam Cao	yes	a	a	1	Bách khoa toàn thư Khúc đồng dao lấm láp Phương pháp giải toán lớp 8
1471	7.105	43071	7	7	Male	7.5	0	0	0	1	2	0	d	Công an	Police officer	Tự do	Freelancer	Labor	45	Hi	Nông dân	Farmer	Labor	45	Hi	med	no	NA	1	e	1	1	1	0	a	NA	a	1	borrow	d	a	Danh nhân Dế Mèn phiêu lưu kí	no	a	a	1	Trạng Quỳnh Tắt đèn Lão Hạc
1559	9.147	43073	9	7	Male	7.5	0	0	0	2	2	1	f	Chưa xác định	NA	Làm ruộng	Farmer	Labor	43	UnderHi	Làm ruộng	Farmer	Labor	33	UnderHi	med	no	NA	1	b	1	1	1	0	e	NA	a	1	borrow	a	a	Thám tử lừng danh Conan One Piece - Đảo hải tặc	yes	b	a	1	Doraemon Shin - Cậu bé bút chì Ô Long Viện
1580	9.19	43073	9	8	Female	7.5	0	0	0	2	2	0	NA	Bác sĩ	Doctor	Bán hàng	Seller	Labor	43	UnderHi	Bán hàng	Seller	Labor	43	UnderHi	med	no	NA	1	b	1	2	1	1	a	NA	a	1	borrow	a	d	Hóa học lí thú Truyện ngắn Nam Cao	yes	b	a	1	Vật lí lí thú Truyện Trạng Quỳnh Truyện động đất sóng thần
1594	9.182	43073	9	8	Male	7.5	0	0	0	1	2	1	b	Ca sĩ	Singer	Trưởng phòng thống kê	Manager	Intellectuals	40	Uni	Kế toán trường	Accountant	Intellectuals	35	Uni	med	no	NA	1	e	1	1	2	1	d	NA	a	1	borrow	a	a	Truyện cổ tích Trạng Quỳnh	yes	a	a	1	Trạng Quỳnh Từ điển bách khoa Truyện cổ tích
1595	9.181	43073	9	8	Female	7.5	0	0	0	1	3	1	b	Công an	Police officer	Thợ xây	Worker	Labor	40	UnderHi	Công nhân giày da	Worker	Labor	39	UnderHi	med	no	NA	0	e	1	2	2	0	a	NA	a	1	borrow	b	d	Truyện ngắn Nam Cao Hạt giống tâm hồn	yes	a	a	1	Từ điển văn học Chí Phèo Truyện cổ tích dân gian Việt Nam
1615	9.214	43073	9	8	Male	7.5	0	0	0	3	3	1	d	Bác sĩ	Doctor	Bộ đội	Soldier	Labor	43	Uni	Làm ruộng	Farmer	Labor	41	UnderHi	med	no	NA	1	b	1	1	1	0	c	NA	a	1	borrow	a	d	Hạt giống tâm hồn Thám tử lừng danh Conan	yes	b	a	1	10000 câu hỏi Vì Sao Truyện Kiều Thám tử lừng danh Conan
1620	9.219	43073	9	8	Male	7.5	0	0	0	1	2	1	f	Cơ khí	Engineer	Làm ruộng	Farmer	Labor	39	UnderHi	Làm ruộng	Farmer	Labor	38	Hi	med	no	NA	1	c	1	1	2	1	e	NA	a	1	borrow	b	b	1000 câu hỏi Vì Sao Những bài thơ nổi tiếng	yes	b	a	1	Nông nghiệp, công nghiệp Những bài thơ hay nhất Truyện kiều
1622	9.222	43073	9	8	Female	7.5	0	0	0	3	3	1	b	Bác sĩ	Doctor	Làm ruộng	Farmer	Labor	42	UnderHi	Làm ruộng	Farmer	Labor	38	UnderHi	med	yes	4000000	1	a	0	2	1	0	a	NA	a	1	buy	a	c	Kí ức xôn xao Quà tặng trong đêm Trung Thu	yes	a	a	1	Tuyển tập các tác phẩm của Nguyên Hồng 1000 câu hỏi Vì Sao Mùa châu chấu
1641	9.424	43073	9	8	Female	7.5	0	0	0	1	2	1	b	Bác sĩ	Doctor	Tự do	Freelancer	Labor	42	UnderHi	Tự do	Freelancer	Labor	36	Hi	med	no	NA	1	b	1	1	2	0	a	NA	a	1	buy	a	a	Dế mèn phiêu lưu ký Con Bim trắng lai đen	yes	b	a	1	Tiểu thuyết "Tắt Đèn" Truyện ngắn về tấm gương đạo đức Hồ Chí Minh
1753	9.336	43073	9	NA	Male	7.5	0	0	0	2	2	1	f	bác sĩ	Doctor	Công nhân ( đã mất)	Employee	Labor	NA	NA	Y tá	Nurse	Intellectuals	45	PostGrad	med	no	NA	1	f	1	1	1	0	f	truyện cười	a	1	borrow	d	c	Danh nhân việt Nam Đại chiến thành teroa	no	a	a	1	Khu vườn trên mây Chưa có bao giờ Khu vườn trên mây
1756	9.339	43073	9	9	Female	7.5	0	0	0	2	3	1	b	Bác sĩ	Doctor	làm ruộng	Farmer	Labor	43	UnderHi	làm ruộng	Farmer	Labor	40	UnderHi	med	no	NA	1	b	1	2	1	0	f	Truyện tranh	a	1	borrow	a	b	Khát vọng sống Quà tặng cuộc sống	no	NA	a	1	Phòng chống thiên tai dịch bệnh Rèn luyện ý chí Những kỳ tích y học
2103	2.3	43076	4	6	Male	7.5	0	0	0	3	3	1	a	Cầu thủ bóng đá	Footballer	Nông dân	Farmer	Labor	49	UnderHi	Nông dân	Farmer	Labor	47	UnderHi	med	no	NA	0	b	1	1	1	0	c	NA	a	1	borrow	d	d	Tôi tài giỏi bạn cũng thế Những điều cực đỉnh về toán học	yes	c	a	1	Doraemon Conan Kế hoạch sống trọn vẹn
2112	2.167	43076	4	7	Male	7.5	0	0	0	3	3	1	d	Điện tử	Engineer	Nông dân	Farmer	Labor	49	UnderHi	Nông dân	Farmer	Labor	42	UnderHi	med	no	7000000	1	f	1	2	1	0	c	NA	a	1	borrow	d	a	Các phong tục nổi tiếng trên thế giới Vũ khí chiến tranh	yes	b	a	1	Con mèo dạy hải âu bay Dế Mèn phiêu lưu kí Sáng tạo
2118	2.161	43076	4	7	Female	7.5	0	0	0	2	2	1	a	Giáo viên	Teacher	Thợ xây	Worker	Labor	45	UnderHi	Công nhân	Worker	Labor	40	UnderHi	med	no	NA	0	b	1	1	1	0	d	NA	a	1	buy	d	a	Hạt giống tâm hồn Hãy đặt trách nhiệm lên vai	no	NA	a	1	Tiếng Hàn Sách về tự nhiên Phổ biến khoa học
2153	2.126	43076	4	7	Male	7.5	0	0	0	1	2	1	f	Giáo viên	Teacher	Hành chính	Employee	Intellectuals	37	Uni	Giáo viên	Teacher	Intellectuals	36	Uni	med	no	NA	1	d	1	3	2	1	f	Sách toán học	a	1	buy	d	a	Những câu chuyện lý thú về toán học Chìa khóa vàng	yes	c	a	1	Chúc 1 ngày tốt lành Học sinh thanh lịch 44 điều cha muốn nói với con trai
2171	2.107	43076	4	7	Female	7.5	0	0	0	1	4	1	e	Họa sĩ	Painter	Thợ xây	Worker	Labor	35	UnderHi	Thợ thủ công	Worker	Labor	34	UnderHi	med	yes	5000000	1	b	1	2	2	1	f	Vũ trụ	a	1	borrow	b	b	Cánh buồm đỏ thắm Cuộc phiêu lưu của những người thích đếm	yes	a	a	1	Cô gái chắp cánh thiên thần Dế Mèn phiêu lưu kí Nhật kí trong tù
2233	8.284	43076	8	8	Female	7.5	0	0	0	3	3	NA	e	Phiên dịch	Interpreter	Công Nhân	Worker	Labor	48	Hi	Công nhân	Worker	Labor	41	Hi	med	no	NA	1	b	1	2	2	0	a	NA	a	1	borrow	a	a	conan Tý Quậy	yes	a	a	1	Tìm hiểu về thiên nhiên Kì quan thế giới lịch sử thời xưa
2347	8.189	43076	8	8	Female	7.5	0	0	0	2	2	1	b	NA	NA	Nông dân	Farmer	Labor	43	UnderHi	Công nhân	Worker	Labor	41	UnderHi	med	no	NA	1	b	1	1	1	1	a	NA	a	1	borrow	NA	NA	Robinxon Conan	yes	b	a	1	Những hiện tượng kì lạ trên trái đất Tắt đèn Nghiên cứu về các hành tinh
2444	13.145	43073	13	7	Male	7.5	0	0	0	3	3	1	d	Cầu thủ bóng đá	Footballer	Nông dân	Farmer	Labor	46	UnderHi	Nông dân	Farmer	Labor	44	UnderHi	poor	no	NA	1	f	1	1	1	0	f	khám phá thế giới	a	1	buy	d	d	doraemon conan	yes	b	a	1	tìm hiểu khoa học thế giới tự nhiên yaiba
2525	16.49	43074	16	6	Female	7.5	0	0	0	1	2	1	b	giáo viên dạy văn	Teacher	làm ruộng	Farmer	Labor	NA	NA	làm ruộng	Farmer	Labor	NA	NA	med	no	NA	1	a	0	2	2	0	a	NA	a	1	borrow	a	a	kể chuyện thần đồng kĩ năng sống dành cho học sinh	yes	a	a	1	conan thám tử lừng danh shin cậu bé bút chì doraemon chú mèo máy đến từ tương lai
2576	13.69	43073	13	6	Female	7.5	0	0	0	1	3	1	c	Bác sĩ	Doctor	công nhân	Worker	Labor	41	Hi	Công nhân	Worker	Labor	32	Hi	med	no	NA	1	NA	1	1	1	1	d	NA	a	1	buy	a	b	sách dạy học tiếng anh sách dạy nấu ăn	yes	a	a	1	sách hướng dẫn làm bánh sách hướng dẫn về địa lí sách hướng dẫn về cách học tiếng anh
2598	5.55	43075	10	7	Male	7.5	0	0	0	1	1	1	d	Phi công	Pilot	Nông dân	Farmer	Labor	59	Hi	Nông dân	Farmer	Labor	56	Uni	med	no	NA	1	b	1	2	1	0	a	NA	a	1	buy	d	a	Tìm hiểu về cách lái máy bay Tìm hiểu chung về ca sĩ Noo Phước Thịnh	yes	b	a	1	Sáng tạo tuổi thơ Đạo đức giáo dục tuổi thơ Tìm hiểu về ngành phi công
2834	15.58	43071	15	6	Male	7.5	0	0	0	3	3	1	c	công an	Police officer	Kinh doanh	Businessman	Labor	45	UnderHi	Công nhân	Worker	Labor	42	UnderHi	med	no	NA	1	b	1	2	2	0	d	NA	a	1	buy	a	a	Những phát kiến mới, tiếng gọi của hoang dã	yes	c	a	1	doraemon, conan, naruto
2862	16.321	43074	16	8	Male	7.5	0	0	0	1	2	1	d	Bộ đội	Soldier	Xây dựng	Worker	Labor	46	Uni	Kế toán	Accountant	Intellectuals	40	Uni	med	no	NA	1	c	1	2	2	1	c	NA	a	1	buy	d	a	Tuổi thơ dữ dội Học ăn học nói học gói học mở	yes	a	a	1	Tắt đèn 10 vạn câu hỏi vì sao Doraemon
2960	16.404	43074	16	8	Female	7.5	0	0	0	2	4	NA	b	Bác sĩ	Doctor	Xây dựng	Worker	Labor	41	UnderHi	Nông dân	Farmer	Labor	36	UnderHi	med	no	NA	1	f	1	2	1	0	a	NA	a	1	buy	a	c	Hoang mạc hoang sơ Những câu hỏi kì thú về thế giới quanh ta	yes	a	a	1	Thế giới hóa học kì thú Không gian vũ trụ Bí mật về thế giới vũ trụ
3098	16.431	43074	16	8	Female	7.5	0	0	0	2	2	1	b	Bác sĩ	Doctor	không xác định	NA	NA	NA	NA	Nông dân	Farmer	Labor	50	UnderHi	poor	no	NA	1	a	0	2	2	0	f	Truyện trinh thám	a	1	borrow	a	a	Conan Truyện gia đình	yes	d	a	1	Doraemon Shin Ô long viện
3103	16.436	43074	16	8	Male	7.5	0	0	0	2	2	0	NA	Thợ điện	Engineer	Thợ xây	Worker	Labor	44	Hi	Công nhân	Worker	Labor	36	UnderHi	med	no	NA	1	c	1	1	1	1	f	Truyện tranh	a	1	buy	b	a	Sau giờ học con trai nói chuyện gì Truyện Phạm Hổ	yes	d	a	1	Conan Doraemon Shin
3104	16.437	43074	16	8	Female	7.5	0	0	0	1	2	1	d	Giáo viên	Teacher	Thợ mộc	Worker	Labor	40	UnderHi	Công nhân	Worker	Labor	39	UnderHi	med	no	NA	1	f	1	1	1	NA	a	NA	a	1	borrow	d	d	Doraemon Truyền thuyết Tiểu hồ ly	yes	a	a	1	Doraemon Truyền thuyết Tiểu hồ ly Tí quậy
3119	3.05	43071	6	9	Male	7.5	0	0	0	1	2	1	e	Bác sĩ	Doctor	Nông dân	Farmer	Labor	38	UnderHi	Nông dân	Farmer	Labor	36	UnderHi	med	no	NA	1	b	1	2	2	NA	e	NA	a	1	borrow	d	a	Địa lý lí thú Tuổi trẻ đáng giá bao nhiêu	NA	b	a	1	Tôi thấy hoa vàng trên cỏ xanh Mắt biếc Lá nằm trong lá
3135	3.22	43071	6	9	Female	7.5	0	0	0	2	2	1	b	Công an	Police officer	Giáo viên	Teacher	Intellectuals	45	Uni	Nông dân	Farmer	Labor	42	Hi	med	no	NA	0	b	1	2	2	0	c	NA	a	1	borrow	a	a	Còn chút gì để nhớ Nhân ái bao dung	yes	b	a	1	Những ngày thơ ấu tôi thấy hoa vàng trên cỏ xanh Bồ câu không đưa thư
3139	3.26	43071	6	9	Male	7.5	0	0	0	3	3	1	f	Kĩ sư	Engineer	Nông dân	Farmer	Labor	46	UnderHi	Nông dân	Farmer	Labor	42	Hi	med	no	NA	1	b	1	2	1	NA	c	NA	a	1	borrow	d	a	Địa lý lí thú Where	yes	a	a	1	Cô gái đến từ hôm qua Sinh vật lý thú Tôi thấy hoa vàng trên cỏ xanh
3165	16.471	43074	16	8	Female	7.5	0	0	0	1	2	1	c	Thợ trang điểm	Makeup artist	Thợ xây	Worker	Labor	34	UnderHi	Công nhân	Worker	Labor	33	UnderHi	med	no	NA	NA	e	1	1	1	0	a	NA	a	1	borrow	a	d	Truyện cổ tích Truyện ngụ ngôn	yes	b	a	1	Truyện cổ tích Việt Nam Vì sao lại thế Danh nhân lịch sử
3173	16.474	43074	16	8	Female	7.5	0	0	0	2	3	1	b	Nhà văn	Writer	Thợ xây	Worker	Labor	41	Hi	Nghề tự do	Freelancer	Labor	38	Hi	med	no	NA	1	a	0	2	2	0	b	NA	a	1	buy	a	a	Tôi muốn biết ở đâu Những chuyện hay giúp trẻ trưởng thành trí tuệ	no	a	a	1	Cổ tích Việt Nam Sách dành cho con gái Ngày em đến trường
3187	15.83	43071	15	6	Female	7.5	0	0	0	2	2	1	a	Bác sĩ	Doctor	Nông dân	Farmer	Labor	41	Hi	Nông dân	Farmer	Labor	42	Hi	poor	no	NA	0	b	1	1	1	0	f	truyện tranh	a	1	buy	a	c	Chuyện cổ tích dành cho người lớn, doraemon	yes	d	a	1	Conan, hạt giống tâm hồn, shin
3236	16.49	43074	16	8	Male	7.5	0	0	0	1	1	1	a	cảnh sát	Police officer	nông dân	Farmer	Labor	43	UnderHi	nông dân	Farmer	Labor	41	UnderHi	med	no	NA	0	d	1	1	1	NA	a	NA	a	1	gift	d	a	Tiếng gọi nơi hoang dã chìa khóa vàng	yes	a	a	1	tôi muốn biết khi nào từ 0 dến vô cực cổ tích việt nam
3270	3.46	43071	6	9	Male	7.5	0	0	0	2	2	1	b	Ca sĩ	Singer	Nông dân	Farmer	Labor	41	UnderHi	Công nhân	Worker	Labor	39	UnderHi	rich	no	NA	1	b	1	1	1	0	d	NA	a	1	borrow	a	a	Doraemon Conan	yes	d	a	1	Kĩ thuật bóng bàn
3358	16.61	43074	16	6	Male	7.5	0	0	0	2	2	1	b	bộ đội	Soldier	làm ruộng	Farmer	Labor	49	NA	làm ruộng	Farmer	Labor	39	Hi	med	no	NA	1	b	1	3	1	0	NA	NA	a	1	gift	a	c	ngồi khóc trên cây - Nguyễn Nhật Ánh bảy bước tới mùa hè - Nguyễn Nhật Ánh	yes	NA	a	1	mắt biếc bồ câu không đưa thư bảy bước tới mùa hè
3499	3.101	43071	6	8	Female	7.5	0	0	0	2	3	1	b	Bác sĩ	Doctor	Thợ xây	Worker	Labor	42	UnderHi	công ty	Businessman	Labor	35	UnderHi	med	no	NA	1	e	1	2	2	1	a	NA	a	1	borrow	a	a	hãy đặt trách nhiệm lên vai Học ăn học nói học gói học mở	yes	a	a	1	Tắt Đèn Những Ngày thơ ấu 10 vạn câu hỏi vì sao
3698	15.184	43071	15	8	Female	7.5	0	0	0	1	3	1	e	Giáo viên	Teacher	Nông dân	Farmer	Labor	38	Hi	Nông dân	Farmer	Labor	33	Hi	med	yes	NA	1	b	1	3	2	1	a	NA	a	1	borrow	d	c	tuổi thơ dữ dội, tắt đèn ( Ngô Tất Tố)	yes	b	a	1	hạt giống tâm hồn, truyện kiều, lão hạc
3720	15.191	43071	15	8	Female	7.5	0	0	0	1	1	1	b	Nhân viên văn phòng	Employee	Nông dân	Farmer	Labor	43	Hi	Công nhân	Worker	Labor	42	Hi	med	no	NA	1	b	1	1	1	0	f	truyện tranh	a	1	borrow	d	c	Thủ lĩnh thẻ bài, học ăn, học nói học gói học mở	yes	d	a	1	Cô gái đến từ hôm qua, truyện Kiều, lão hạc
3831	3.182	43071	6	7	Male	7.5	0	0	0	3	3	1	f	Nhà sáng chế	Inventor	Nông dân	Farmer	Labor	NA	UnderHi	Nông dân	Farmer	Labor	NA	UnderHi	NA	yes	4000000	0	f	1	2	1	0	f	Sáng tạo	a	1	borrow	c	d	Sách sáng tạo Doraemon	yes	c	a	1	Cách chơi bóng rổ Hướng dẫn làm đồ điện Những câu đố vui
3926	16.189	43074	16	7	Female	7.5	0	0	0	1	3	1	b	phát thanh viên	Reporter	thợ xây	Worker	Labor	34	UnderHi	nội trợ	Unemployed	Labor	34	Hi	med	no	NA	1	a	0	1	2	0	a	NA	a	1	borrow	b	a	cô gái đến từ hôm qua nhật kí công chúa	yes	b	a	1	bitpi tất dài cô gái bên cửa sổ truyện danh nhân
4011	10.114	43074	5	6	Female	7.5	0	0	0	1	3	1	b	cắt tóc	Barber	nông dân	Farmer	Labor	34	UnderHi	công nhân	Worker	Labor	33	UnderHi	med	no	NA	1	c	1	1	1	0	e	NA	a	1	borrow	d	b	bài học vô giá dạy trẻ có trí tiến thủ	yes	c	a	1	ông gió bà mưa phát minh quái quỷ bạn có thể thay đổi thế giới
4039	15.217	43071	15	8	Male	7.5	0	0	0	1	3	1	e	Game thủ chuyên nghiệp	Gamer	Nông dân	Farmer	Labor	34	UnderHi	Công nhân	Worker	Labor	33	UnderHi	med	no	NA	1	a	0	2	2	0	a	NA	a	1	borrow	a	a	thiên nhiên thật kỳ thú, truyện kiều	yes	b	a	1	truyện cổ tích VN, các sáng tạo trẻ, các bài văn hay
4052	10.147	43075	5	7	Male	7.5	0	0	0	2	2	1	f	thầy đồng	Shaman	thợ xây	Worker	Labor	38	UnderHi	công nhân	Worker	Labor	35	UnderHi	med	no	NA	1	f	1	2	1	0	f	lễ hội	a	1	buy	d	a	lịch sử 36 giá đồng các cách kêu nôm	yes	a	a	1	10 vạn câu hỏi vì sao tận cùng của nguyên nhân cái chết các kiểu mẫu áo hầu đồng
4053	10.148	43075	5	7	Female	7.5	0	0	0	3	3	1	f	giáo viên	Teacher	thợ xây	Worker	Labor	48	Hi	nông dân	Farmer	Labor	49	NA	med	no	NA	0	b	1	2	2	0	b	NA	a	1	borrow	a	a	NA	yes	a	a	1	những tấm lòng cao cả 10 triệu câu hỏi vì sao còn chút gì để nhớ
4056	10.151	43075	5	7	Male	7.5	0	0	0	2	4	1	d	sửa chữa ô tô	Repairman	thợ xây	Worker	Labor	35	UnderHi	nông dân	Farmer	Labor	33	UnderHi	poor	no	NA	1	b	1	1	1	0	a	NA	a	1	buy	d	a	truyện dân gian truyện tranh lịch sử	yes	d	a	1	doraemon ô long viện bí ẩn cơ thể người
4059	10.153	43075	5	7	Male	7.5	0	0	0	2	2	1	a	youtuber	Public figure	lái xe	Driver	Labor	42	UnderHi	nông dân	Farmer	Labor	42	UnderHi	poor	NA	5000000	1	f	1	1	1	0	f	công nghệ thông tin	a	1	borrow	a	d	hướng dẫn sủa chữa điện tử dạy trở thành hacker tricker	yes	a	a	1	những tấm lòng cao cả tập làm nhà phát minh chiếc hộp kì diệu
4076	15.226	43071	15	8	Female	7.5	0	0	0	2	3	1	f	Bác sĩ	Doctor	Nông dân	Farmer	Labor	42	UnderHi	Nông dân	Farmer	Labor	35	UnderHi	rich	no	NA	1	b	1	2	2	1	a	NA	a	1	borrow	a	b	Truyện Kiều, Shin cậu bé bút chì	no	NA	a	1	Thỏ peter và các bạn, tắt đèn, truyện cổ tích
4161	3.233	12/02/22017	6	6	Male	7.5	0	0	0	1	2	0	NA	Cầu thủ bóng đá	Footballer	Thợ xây	Worker	Labor	39	UnderHi	Nông dân	Farmer	Labor	38	UnderHi	rich	NA	NA	NA	f	1	1	2	1	f	Đá bóng	a	1	buy	b	a	Kĩ thuật chơi bóng đá Thế giới động vaajt	yes	d	a	1	Những tấm lòng cao cả Vũ khí chiến tranh Ươm mầm toán học
4193	3.265	43071	6	NA	Female	7.5	0	0	0	2	3	1	b	Bác sĩ	Doctor	Nông dân	Farmer	Labor	41	UnderHi	Nông dân	Farmer	Labor	36	NA	med	no	NA	1	a	0	2	2	0	a	NA	a	1	buy	a	a	Học tốt ngữ văn Bí mật học đường	no	NA	a	1	Cổ tích truyện cười Conan
4251	10.254		5	7	Female	7.5	0	0	0	2	2	1	d	không xác định	NA	nông dân	Farmer	Labor	37	Hi	nông dân	Farmer	Labor	35	PostGrad	med	no	NA	1	a	0	2	1	0	a	NA	a	1	borrow	a	b	trần hoài dương về mẹ	yes	a	a	1	cô bé lọ lem cây bút thần nàng bạch tuyết và 7 chú lùn
4255	10.258		5	7	Female	7.5	0	0	0	3	1	1	b	không xác định	NA	nông dân	Farmer	Labor	37	NA	công nhân	Worker	Labor	31	NA	med	no	NA	1	a	0	2	2	1	a	NA	a	1	borrow	d	b	về mẹ bàn có 5 chỗ ngồi	NA	a	a	1	doraemon cây bút thần conan
4329	3.288	43071	6	6	Female	7.5	0	0	0	1	3	1	a	Thiết kế thời trang	Fashion designer	Công Nhân	Worker	Labor	39	Hi	Công nhân	Worker	Labor	32	UnderHi	med	no	NA	1	a	0	2	2	1	a	NA	a	1	buy	a	a	Conan Từ điển Anh Việt	yes	a	a	1	Sách động vật Sách thực vật
4373	10.338	43074	5	8	Female	7.5	0	0	0	1	2	0	d	bác sĩ	Doctor	nông dân	Farmer	Labor	35	Hi	nông dân	Farmer	Labor	34	Hi	med	no	NA	1	b	1	1	1	0	d	NA	a	1	borrow	a	a	học ăn học nói học gói học mở vượt lên số phận	yes	b	a	1	thế giới động vật khoa học đời sống vũ trụ bao la
4415	15.275	43071	15	8	Male	7.5	0	0	0	2	3	1	f	Nghiên cứu	Scientist	Công nhân	Worker	Labor	45	Hi	Công nhân	Worker	Labor	40	Hi	med	yes	NA	1	a	0	2	2	NA	d	NA	a	1	borrow	a	d	khám phá rừng xanh, doraemon	yes	d	a	1	Conan, shin,
4421	15.278	43071	15	8	Male	7.5	0	0	0	2	3	1	b	phó chủ tịch	Politician	Lái tàu	Driver	Labor	45	Hi	Nông dân	Farmer	Labor	36	UnderHi	rich	yes	13000000	1	e	1	2	2	1	b	NA	a	1	buy	a	a	Conan, Khám phá thế giới	yes	b	a	1	Shin, conan, doraemon
4517	10.426	43074	5	9	Male	7.5	0	0	0	2	2	1	NA	không xác định	NA	nông dân	Farmer	Labor	42	UnderHi	nông dân	Farmer	Labor	42	UnderHi	NA	no	NA	1	b	1	1	1	0	a	NA	a	1	borrow	b	a	búp sen xanh 10 điều tạo nên số phận	yes	d	a	1	khám phá thế giới shin bí đỏ
4528	10.437	43074	5	9	Female	7.5	0	0	0	2	3	1	d	đầu bếp	Chef	công nhân	Worker	Labor	37	UnderHi	công nhân	Worker	Labor	36	UnderHi	med	no	NA	1	f	1	2	3	0	a	NA	a	1	borrow	d	d	2 chị em tình cha ấm áp	yes	a	a	1	truyện kiều conan tắt đèn
4539	15.317	43071	15	9	Male	7.5	0	0	0	1	2	1	f	Bác sĩ	Doctor	Nông dân	Farmer	Labor	40	UnderHi	Nông dân	Farmer	Labor	38	UnderHi	med	no	NA	1	b	1	1	2	0	f	truyện tranh	a	1	borrow	a	b	conan, doraemon	yes	b	a	1	toán học và nghệ thuật, hạt giống tâm hồn, kỹ năng sống
4559	10.445	43074	5	9	Male	7.5	0	0	0	1	2	1	d	không xác định	NA	công nhân	Worker	Labor	36	UnderHi	nông dân	Farmer	Labor	35	UnderHi	med	no	NA	1	f	1	1	1	0	c	NA	a	1	borrow	d	a	doraemon thiên nhiên hoang dã	yes	a	a	1	doraemon conan shin
4560	10.446	43074	5	9	Female	7.5	0	0	0	4	5	1	d	phiên dịch viên	Interpreter	nông dân	Farmer	Labor	50	UnderHi	nông dân	Farmer	Labor	48	UnderHi	med	no	NA	1	f	1	1	2	0	d	NA	a	1	borrow	d	b	tình cha cô gái hát lạc điệu	NA	b	a	1	conan ngôi mộ đom đóm truyện kiều
4587	15.337	43071	15	9	Female	7.5	0	0	0	2	3	1	b	Phiên dịch viên	Interpreter	Nông dân	Farmer	Labor	42	Hi	Nông dân	Farmer	Labor	40	UnderHi	med	no	NA	1	c	1	1	1	0	d	NA	a	1	borrow	b	d	Hãy đặt trách nhiệm lên vai, Đấc nhân tâm	yes	b	a	1	NA
4589	15.338	43071	15	9	Female	7.5	0	0	0	2	2	1	f	Biên đạo múa	Choreographer	Bộ đội	Soldier	Labor	47	Uni	Giáo viên	Teacher	Intellectuals	45	Uni	med	yes	NA	1	b	1	2	1	0	d	NA	a	1	borrow	b	b	tuổi trẻ đáng giá bao nhiêu, truyện kiều	yes	a	a	1	NA
4612	15.347	43071	15	9	Female	7.5	0	0	0	2	2	1	b	Giáo viên	Teacher	Nông dân	Farmer	Labor	40	UnderHi	Nông dân	Farmer	Labor	38	UnderHi	med	no	NA	1	c	1	1	1	0	e	NA	a	1	borrow	d	d	hạt giống tâm hồn, truyện kiều	yes	b	a	1	Shin, Tý quậy, doraemon
4624	10.464	43074	5	9	Male	7.5	0	0	0	1	2	1	e	không xác định	NA	nông dân	Farmer	Labor	NA	UnderHi	nông dân	Farmer	Labor	NA	UnderHi	med	NA	NA	1	a	0	3	NA	NA	b	NA	a	1	borrow	c	a	thi nhân việt nam phép lịch sử	yes	b	a	1	vật lí đa cáp toán học đại số tiếp anh cấp tốc
4739	10.516		5	9	Female	7.5	0	0	0	1	3	1	b	giáo viên	Teacher	nông dân	Farmer	Labor	37	UnderHi	nông dân	Farmer	Labor	NA	UnderHi	med	no	NA	1	c	1	2	2	0	e	NA	a	1	borrow	b	d	thằng quỷ nhỏ việt làng	yes	b	a	1	chiến tranh và hòa bình đắc nhân tâm sông đông êm đềm
4740	10.517		5	9	Male	7.5	0	0	0	2	2	1	b	bác sĩ	Doctor	nông dân	Farmer	Labor	47	Hi	nông dân	Farmer	Labor	NA	Hi	poor	no	NA	1	f	1	1	2	0	a	NA	a	1	borrow	a	b	lịch sử việt nam dế mèn phưu lưu kí	yes	c	a	1	doraemon chiến tranh và hòa bình sông đông êm đềm
4752	10.526		5	9	Female	7.5	0	0	0	2	4	1	d	bác sĩ	Doctor	nông dân	Farmer	Labor	45	NA	công nhân	Worker	Labor	41	UnderHi	med	no	NA	1	b	1	2	2	1	a	NA	a	1	borrow	a	d	việc làng tấm gương cong	yes	a	a	1	tuyển tập nam cao tắt đèn sông đông êm đềm
4797	10.12	43074	5	6	Female	7.5	0	0	0	3	3	1	b	công an	Police officer	làm ruộng	Farmer	Labor	48	Hi	làm ruộng	Farmer	Labor	46	Hi	med	no	NA	1	b	1	2	3	1	a	NA	a	1	borrow	d	c	hạt giống tâm hồn 1 chú bé rắc rối	yes	b	a	1	túp lều bác tôm dế mèn phiêu lưu kí chiến tranh và hòa bình
4868	10.76	43075	5	6	Male	7.5	0	0	0	1	3	1	d	đầu bếp	Chef	làm ruộng	Farmer	Labor	35	PostGrad	công nhân	Worker	Labor	30	Uni	med	no	NA	0	a	0	1	1	0	a	NA	a	1	borrow	b	b	ước gì mình biết được doremon	yes	d	a	1	đại dương khó thương ước gì mình biết được 2 vạn dặm dưới đáy biển
3483	3.88	43071	6	8	Male	7.45	0	0	0	1	2	1	c	gamer	Gamer	Cán bộ xã	Public servant	Intellectuals	43	Uni	Giáo viên	Teacher	Intellectuals	35	Uni	rich	no	NA	1	f	1	1	2	1	f	Truyện tranh	a	1	buy	a	a	Doraemon Cậu bé bút chì	yes	a	a	1	Khám phá thiên nhiên Trạng Quỳnh Cô bé bán diêm
610	11.186	43071	11	8	Female	7.4	0	0	0	5	5	1	b	Nghệ sĩ	Artist	Làm ruộng	Farmer	Labor	53	UnderHi	Công nhân	Worker	Labor	47	UnderHi	med	no	NA	1	a	0	2	2	1	f	ND liên quan đến Hạt giống tâm hồn	a	1	borrow	a	a	Những tấm gương đạo đức của bác Hồ Những cách để trở nên thông minh hơn	yes	c	a	1	Đừng bao giờ từ bỏ ước mơ Nâng cao sức mạnh tinh thần Biển cả và giá trị cuộc sống
895	11.89	43071	11	7	Female	7.4	0	0	0	3	3	1	b	Giáo viên	Teacher	Nông dân	Farmer	Labor	53	UnderHi	Nông dân	Farmer	Labor	49	UnderHi	med	no	NA	1	a	0	1	1	0	a	NA	a	1	borrow	a	c	Những truyện hay viết về thiếu nhi của Tô Hoài Núi lửa nóng hơn cả lửa	no	b	a	1	Doraemon Dế mèn phiêu lưu ký Cây khế
1077	14.111	43071	14	8	Female	7.4	0	0	0	2	2	1	b	Ca sĩ	Singer	Xây dựng	Worker	Labor	43	Hi	Nông dân	Farmer	Labor	38	Hi	med	no	NA	1	c	1	2	1	0	d	NA	a	1	borrow	d	b	Nhà phát minh vĩ đại nhất bắt đầu từ đây Văn học nghệ thuật	yes	d	a	1	Học viện âm nhạc Xứ sở thần tiên Doraemon
1110	14.144	43071	14	9	Male	7.4	0	0	0	1	2	1	d	Bác sĩ	Doctor	Cơ khí	Engineer	Labor	35	UnderHi	Công nhân	Worker	Labor	32	UnderHi	med	no	NA	1	b	1	3	2	0	c	NA	a	1	borrow	a	d	Hachiko - chú chó đợi chờ Hai vạn dặm dưới đáy biển	yes	a	a	1	Truyện Kiều Bản án chế độ thực dân Pháp Sự im lặng của bầy cừu
1217	1.22	43077	1	6	Female	7.4	0	0	0	1	2	1	b	Không xác định	NA	Xây dựng	Worker	Labor	49	Uni	Văn thư	Employee	Intellectuals	35	Uni	med	no	NA	1	b	1	2	1	1	a	NA	a	1	borrow	b	a	Giúp em học tốt Ngữ Văn Những bài làm văn mẫu lớp 6	yes	a	a	1	Những thoáng trong đời Cậu bé bút chì
1218	1.22	43077	1	6	Female	7.4	0	0	0	1	2	1	b	Không xác định	NA	Xây dựng	Worker	Labor	49	Uni	Văn thư	Employee	Intellectuals	35	Uni	med	no	NA	1	b	1	2	1	1	a	NA	a	1	borrow	b	a	Giúp em học tốt Ngữ Văn Những bài làm văn mẫu lớp 6	yes	a	a	1	Những thoáng trong đời Cậu bé bút chì
1280	1.173	43077	1	9	Male	7.4	0	0	0	1	2	1	a	Cảnh sát	Police officer	Nông dân	Farmer	Labor	45	UnderHi	Công nhân	Worker	Labor	44	Hi	med	no	NA	1	d	1	2	2	0	e	NA	a	1	borrow	d	a	Văn hóa ứng xử khi giao tiếp Giáo dục kĩ năng sống	yes	a	a	1	Kỹ năng tồn tại và thoát hiểm Kỹ năng làm việc đồng đội Kỹ năng quản lý thời gian
2327	8.218	43076	8	8	Male	7.4	0	0	0	2	2	1	f	Cảnh sát	Police officer	Nông dân	Farmer	Labor	41	UnderHi	Nông dân	Farmer	Labor	40	UnderHi	med	no	NA	1	c	1	2	2	0	c	NA	a	1	borrow	d	b	Ông già và biển cả Những phát kiến mới	yes	a	a	1	Niuton thiên nhiên hoang dã những kì quan thế giới
2597	8.166	43076	8	7	Male	7.4	0	0	0	2	2	1	b	Cảnh sát cơ động	Police officer	Tài xế	Driver	Labor	NA	UnderHi	Nông dân	Farmer	Labor	NA	UnderHi	rich	no	NA	1	f	1	1	2	0	f	Truyện tranh	a	1	borrow	c	a	Tắt đèn Bí ẩn cơ thể người	yes	NA	a	1	101 điều chưa biết về khoa học Không gia đình
2954	16.399	43074	16	8	Female	7.4	0	0	0	2	2	1	a	Giáo viên	Teacher	Thợ xây	Worker	Labor	42	UnderHi	Nông dân	Farmer	Labor	36	UnderHi	NA	no	NA	0	b	1	1	1	0	e	NA	a	1	borrow	b	a	Bí mật của toán học Chuyện vui vật lý	yes	b	a	1	Chuyện vui vật lý Bí mật toán học Ngữ pháp tiếng anh
3140	3.27	43071	6	9	Female	7.4	0	0	0	1	3	1	f	Tạo mẫu tóc	barber	Nông dân	Farmer	Labor	NA	UnderHi	Công nhân	Worker	Labor	NA	Hi	rich	NA	NA	1	NA	1	2	NA	0	f	Truyện tranh	a	1	buy	a	NA	Cậu bé bút chì Conan	yes	d	a	1	Truyện Kiều
3351	16.59	43074	16	6	Female	7.4	0	0	0	2	3	1	b	đầu bếp	Chef	làm ruộng	Farmer	Labor	38	Uni	làm ruộng	Farmer	Labor	34	Uni	rich	no	NA	1	a	0	1	3	0	a	NA	a	1	buy	a	b	bong bóng lên trời hạt giống tâm hồn	yes	d	a	1	mắt biếc bồ câu không đưa thư cô gái đến từ hôm qua
3403	16.91	43074	16	6	Female	7.4	0	0	0	1	1	1	d	nhà sinh vật học	Scientist	xây dựng	Worker	Labor	48	Hi	làm ruộng	Farmer	Labor	36	Hi	med	no	NA	1	d	1	1	1	0	c	NA	a	1	buy	d	a	100 phát minh làm nên lịch sử những điều lí thú bạn chưa biết	no	NA	a	1	sách về khoa học sách về văn học sách về thiên nhiên
3809	16.146	43074	16	6	Male	7.4	0	0	0	1	2	1	a	giáo viên	Teacher	làm ruộng	Farmer	Labor	43	Hi	làm ruộng	Farmer	Labor	31	UnderHi	med	no	NA	1	b	1	1	2	0	c	NA	a	1	borrow	b	a	thạch sanh shin cậu bé bút chì	yes	a	a	1	đảo dấu vàng tấm cám đảo hải tặc
4597	16.223	43074	16	7	Female	7.4	0	0	0	4	4	1	d	công an	Police officer	thợ xây	Worker	Labor	NA	Hi	làm ruộng	Farmer	Labor	NA	UnderHi	med	no	NA	0	c	1	2	2	0	a	NA	a	1	borrow	a	a	hai vạn dặm dưới đáy biển túp lều bác tôm	yes	b	a	1	học cách học tập học cách làm người học cách ứng xử
4647	15.364	43071	15	9	Female	7.4	0	0	0	2	3	1	d	Giáo viên	Teacher	Nông dân	Farmer	Labor	50	UnderHi	Nông dân	Farmer	Labor	48	UnderHi	med	no	NA	1	c	1	2	1	0	a	NA	a	1	borrow	d	d	Đắc nhân tâm, có chút gì đáng nhớ	yes	b	a	1	chiến tranh và hoà bình, chí phèo, truyện ngắn của Nguyền Ngọc Ánh
684	11.215	43071	11	9	Male	7.3	0	0	0	2	2	1	a	Kiến trúc sư	Architect	Làm ruộng	Farmer	Labor	43	UnderHi	Làm ruộng	Farmer	Labor	41	UnderHi	med	no	NA	1	b	1	1	1	0	c	NA	a	1	borrow	a	b	Kĩ năng sống dành cho học sinh biết lựa chọn Kĩ năng sống dành cho học sinh biết trân trọng	yes	b	a	1	Một lít nước mắt Đọc vị bất kì ai Thế giới mở rộng
817	11.47	43071	11	6	Female	7.3	0	0	0	1	1	1	a	Ca sĩ	Singer	Công nhân	Worker	Labor	34	UnderHi	Công nhân	Worker	Labor	31	UnderHi	med	no	NA	1	f	1	3	1	0	a	NA	a	1	borrow	a	a	199 bài văn hay lớp 6 Cách để cải thiện tiếng Anh	yes	a	a	1	Tấm Cám Hướng tới tương lai Cách cải thiện Toán, Văn
839	9.139	43073	9	7	Female	7.3	0	0	0	3	3	1	b	diễn viên	Actor	Làm thợ	Worker	Labor	47	UnderHi	nội trợ	Unemployed	Labor	44	UnderHi	med	no	NA	1	e	1	2	2	0	a	NA	a	1	borrow	a	a	Tuổi trẻ đáng giá bao nhiêu Cái lạnh đầu mùa	yes	a	a	1	Việt Nam Sử lược Thuyền Trưởng Đơn vị Cánh buồm Đỏ thắm
878	11.72	43071	11	7	Male	7.3	0	0	0	3	3	1	a	Thợ xây	Worker	Nông dân	Farmer	Labor	45	UnderHi	Nông dân	Farmer	Labor	44	UnderHi	rich	no	NA	1	b	1	1	1	0	a	NA	a	1	buy	a	a	Hạt giống tâm hồn Những tấm lòng cao cả	yes	b	a	1	Thám tử lừng danh Conan Cây khế Doraemon
896	11.9	43071	11	7	Female	7.3	0	0	0	2	2	1	e	Công nhân	Worker	Nông dân	Farmer	Labor	39	UnderHi	Nông dân	Farmer	Labor	38	UnderHi	med	no	NA	1	b	1	1	2	0	a	NA	a	1	borrow	a	c	Mắt biếc Tắt đèn	yes	a	a	1	Nữ Thần báo tử Công chúa mặt trăng Học sinh chân kinh
898	11.92	43071	11	7	Female	7.3	0	0	0	3	4	1	d	Giám đốc	Director	Nông dân	Farmer	Labor	48	UnderHi	Nông dân	Farmer	Labor	45	UnderHi	med	no	NA	1	b	1	1	1	0	a	NA	a	1	borrow	a	a	Mắt biếc Doraemon	yes	a	a	1	Thám tử lừng danh Conan Cậu bé bút chì Tít và Mít
1027	9.128	43073	9	7	Female	7.3	0	0	0	1	2	1	e	bác sĩ	Doctor	Làm thợ	Worker	Labor	40	Hi	Công nhân	Worker	Labor	35	Hi	med	no	NA	1	e	1	1	1	0	e	NA	a	1	borrow	b	d	Gió lạnh đầu mùa Tôi muốn biết mọi thứ	yes	c	a	1	Hạt giống tâm hồn Cách chọn trang phục Lắng nghe hay nhận một viên đá
1243	1.104	43077	1	8	Female	7.3	0	0	0	2	2	NA	b	Công tố viên	Prosecutor	Tư pháp	Public servant	Intellectuals	43	Hi	Nông dân	Farmer	Labor	37	UnderHi	med	no	NA	1	f	1	1	2	0	a	NA	a	1	borrow	d	c	Con đường lá me Những tấm lòng cao cả	yes	d	a	1	Trăm năm thoáng chốc Mùa xuân về Bách khoa toàn thư
2136	2.143	43076	4	7	Female	7.3	0	0	0	1	2	1	b	Bác sĩ	Doctor	Thợ xây	Worker	Labor	43	Hi	Công nhân	Worker	Labor	41	Hi	rich	no	NA	1	a	0	1	1	0	a	NA	a	1	buy	a	a	Hạt giống tâm hồn Quà tặng cuộc sống	yes	d	a	1	NA
2199	8.292	43076	8	9	Male	7.3	0	0	0	2	2	1	d	Nấu ăn	Chef	Công Nhân	Worker	Labor	43	Hi	Công nhân	Worker	Labor	41	Hi	med	no	NA	1	b	1	1	2	0	a	NA	a	1	buy	a	a	Hạt giống tâm hồn Black Jack	yes	a	a	1	Dế mèn phiêu lưu kí Tắt đèn Rèn kĩ năng toán học
2215	8.308	43076	8	9	Female	7.3	0	0	0	1	0	1	b	Bác sĩ thú y	Vet	NA	NA	NA	NA	NA	Công nhân	Worker	Labor	40	UnderHi	rich	yes	NA	1	d	1	3	3	0	c	NA	a	1	buy	a	d	Khoa học đời sống Khoa học động vật	yes	c	a	1	Khoa học đời sống Khoa học thiên nhiên 1 nghìn câu hỏi vì sao
2370	16.07	43074	16	6	Female	7.3	0	0	0	2	2	1	c	hướng dẫn viên du lịch	Tour guide	nông dân	Farmer	Labor	49	Hi	nông dân	Farmer	Labor	42	Hi	rich	no	NA	1	e	1	1	1	0	a	NA	a	1	borrow	c	a	Candy book! Bí mật học đường Bang! chúng ta đã xuất hiện như thế nào	yes	d	a	1	Về con cha hát Cô gái đến từ hôm qua Người bạn đích thực
2523	16.47	43074	16	6	Female	7.3	0	0	0	3	4	1	d	giáo viên dạy sinh	Teacher	làm ruộng	Farmer	Labor	52	UnderHi	là ruộng	Farmer	Labor	50	UnderHi	poor	no	NA	1	f	1	1	1	0	c	NA	a	1	borrow	a	a	sinh học lý thú khoa học tự nhiên	yes	c	a	1	khám phá thế giới động vật 306 điều kì diệu về thiên nhiên nhà khoa học thám hiểm thế giới
2559	8.151	43076	8	7	Female	7.3	0	0	0	2	2	1	b	Bác sĩ	Doctor	Nông dân	Farmer	Labor	NA	NA	Nông dân	Farmer	Labor	NA	NA	med	no	NA	1	f	1	1	1	0	f	Truyện tranh	a	1	buy	a	a	Những bài văn hay Doraemon	yes	b	a	1	Từ điển Truyện tranh Văn hay
3076	16.408	43074	16	8	Male	7.3	0	0	0	1	1	1	b	Nông dân	Farmer	Nông dân	Farmer	Labor	37	UnderHi	Nông dân	Farmer	Labor	37	UnderHi	med	no	NA	1	a	0	2	2	0	a	NA	a	1	borrow	a	a	Lịch sử Việt Nam Truyện văn học hay nhất	NA	a	a	1	Những mẩu chuyện về những người có chí học ở Việt Nam Kĩ năng rèn luyện đạo đức Doraemon
3105	16.438	43074	16	8	Female	7.3	0	0	0	1	2	1	c	Phiên dịch viên	Interpreter	Nông dân	Farmer	Labor	34	Hi	Công nhân	Worker	Labor	33	Hi	rich	no	NA	1	f	1	1	1	1	a	NA	a	1	buy	d	a	Doraemon Những cuộc phiêu lưu của Gulliver	yes	c	a	1	Shin Tí quậy Tiểu pudding
3115	16.448	43074	16	8	Male	7.3	0	0	0	1	1	0	a	Giám đốc	Director	Thợ xây	Worker	Labor	38	UnderHi	Nông dân	Farmer	Labor	NA	UnderHi	poor	no	NA	0	b	1	1	1	0	e	NA	a	1	borrow	c	a	Doraemon Conan	no	c	a	1	Thần đồng đất việt Conan Suguku
3373	16.7	43074	16	6	Male	7.3	0	0	0	2	2	1	e	bộ đội	Soldier	xây dựng	Worker	Labor	38	UnderHi	làm ruộng	Farmer	Labor	36	NA	med	NA	NA	1	a	0	2	2	0	d	NA	a	1	buy	b	a	bí ẩn tự nhiên vũ trụ bàn có năm chỗ ngồi	yes	d	a	1	con bin trắng tại đen
3477	3.85	43071	6	8	Male	7.3	0	0	0	2	2	1	d	Admin	Manager	Tự do	Freelancer	Labor	44	Hi	Thợ may	Worker	Labor	39	Hi	med	no	NA	0	f	1	1	1	0	c	NA	a	1	borrow	d	b	Robinson Tuổi thơ dữ dội	yes	a	a	1	Dế Mèn Alice ở xứ sở thần tiên Harry Potter
3506	3.108	43071	6	8	Male	7.3	0	0	0	1	2	1	f	Streamer	Public figure	Nông dân	Farmer	Labor	39	UnderHi	Công nhân	Worker	Labor	35	UnderHi	rich	no	NA	1	b	1	1	1	0	d	NA	a	1	borrow	a	c	Nam Cao Tuổi thơ dữ dội	yes	c	a	1	10 vạn câu hỏi vì sao Thạch Sanh Sơn Tinh, Thủy Tinh
3824	3.175	43071	6	7	Male	7.3	0	0	0	2	2	1	f	Nhà Khoa học	Scientist	Công Nhân	Worker	Labor	36	NA	Nội trợ	Unemployed	Labor	36	NA	med	no	NA	1	f	1	2	1	0	f	Khoa học kĩ thuật	a	1	borrow	c	a	Khoa học kĩ thuật Những phát minh lớn	yes	a	a	1	Tôi tài giỏi bạn cũng thế Trạng cười Đại Việt sử kí toàn thư
3845	3.196	43071	6	7	Female	7.3	0	0	0	2	2	1	f	Công nghệ thông tin	Engineer	Công Nhân	Worker	Labor	NA	UnderHi	Công nhân	Worker	Labor	NA	UnderHi	med	no	NA	1	a	0	2	2	1	f	công nghệ thông tin	a	1	buy	d	b	Công nghệ thông tin Phổ biến khoa học	yes	a	a	1	Truyện Kiều Công nghệ khoa học Thế giới thực vật
4046	15.222	43071	15	8	Female	7.3	0	0	0	3	4	1	a	Thư kí	Secretary	Nông dân	Farmer	Labor	42	UnderHi	Nông dân	Farmer	Labor	40	Hi	med	no	NA	1	a	0	2	2	0	a	NA	a	1	borrow	a	b	Shin cậu bé bút chì	no	b	a	1	Truyện Kiều, truyện cổ tích VN
4106	10.184	43075	5	7	Male	7.3	0	0	0	6	7	1	d	bác sĩ	Doctor	nông dân	Farmer	Labor	50	UnderHi	nông dân	Farmer	Labor	51	UnderHi	med	no	NA	0	b	1	1	1	0	c	NA	a	1	borrow	d	a	động vật thực vật cây xanh ...	yes	a	a	1	thế giới động vật hoàng tử bé ngụ ngôn phương tây
4152	3.224	43071	6	7	Male	7.3	0	0	0	2	2	0	d	Ca sĩ	Singer	NA	NA	NA	NA	NA	công ty	Businessman	Labor	34	UnderHi	med	no	NA	1	f	1	1	1	1	d	NA	a	1	buy	d	c	Doraemon	no	NA	a	1	NA
4154	3.226	43071	6	7	Female	7.3	0	0	0	2	2	1	a	Ca sĩ	Singer	Nông dân	Farmer	Labor	40	UnderHi	Nông dân	Farmer	Labor	35	UnderHi	med	no	NA	1	b	1	2	1	1	f	Hoa học trò	a	1	borrow	d	b	Cậu bé bút chì	yes	a	a	1	Ước mơ
4169	3.241	43071	6	6	Male	7.3	0	0	0	1	3	1	c	Phiên dịch	Interpreter	Nông dân	Farmer	Labor	34	UnderHi	Công nhân	Worker	Labor	31	UnderHi	rich	no	NA	NA	a	0	3	2	0	f	từ điển Nga	a	1	buy	a	a	10 vạn câu hỏi vì sao Từ điển ngoại ngữ	yes	a	a	1	Dế Mèn Kĩ năng cầu lông Tuyển tập cổ tích thế giới
4179	3.251	43071	6	6	Female	7.3	0	0	0	2	3	1	e	Bác sĩ	Doctor	Nông dân	Farmer	Labor	42	Hi	Nông dân	Farmer	Labor	32	Hi	rich	NA	NA	NA	b	1	2	3	1	a	NA	a	1	borrow	b	c	Kĩ năng sống Những câu ca dao tục ngữ hay	yes	b	a	1	Lớp học bồ câu Kĩ năng sinh tồn Không gia đình
4219	10.222	43074	5	7	Female	7.3	0	0	0	1	2	1	d	giáo viên	Teacher	không xác định	NA	NA	NA	NA	công nhân	Worker	Labor	NA	NA	med	no	NA	1	NA	1	1	1	0	a	NA	a	1	buy	a	b	1 nghìn lẻ 1 đêm kho tàng cổ tích việt nam	yes	d	a	1	conan tuổi thơ dữ dội luôn mỉn cười với cuôc sống
4534	15.312	43071	15	9	Male	7.3	0	0	0	3	3	1	d	đầu bếp	Chef	Nông dân	Farmer	Labor	48	UnderHi	Nông dân	Farmer	Labor	45	UnderHi	med	no	NA	0	f	1	2	1	0	NA	NA	a	1	buy	a	a	sách hướng dẫn nấu ăn, kỹ năng sống	yes	a	a	1	toán học và nghệ thuật, kỹ năng sống,
4537	15.315	43071	15	9	Male	7.3	0	0	0	2	2	1	f	Nấu ăn	Chef	Nông dân	Farmer	Labor	41	UnderHi	Công nhân	Worker	Labor	37	UnderHi	med	no	NA	1	f	1	2	1	0	d	NA	a	1	borrow	a	a	hạt giống tâm hồn, kĩ năng sống	yes	a	a	1	bầu trời sụp đổ, tản đà thơ, kỹ năng sống biết lựa chọn
19	19	43075	2	8	Female	7.25	0	0	0	1	3	1	b	công nhân	Worker	làm ruộng	Farmer	Labor	36	UnderHi	Công nhân	Worker	Labor	38	UnderHi	med	no	NA	1	a	0	1	1	0	a	NA	a	1	buy	d	d	Đô Rê Mon Shin cậu bé bút chì	yes	b	a	1	Ông lão đánh cá và con cá vàng Nghìn lẻ một đêm Cô nan
3182	3.32	43071	6	9	Male	7.25	0	0	0	4	4	1	b	Giám đốc	Director	Nông dân	Farmer	Labor	47	Hi	Nông dân	Farmer	Labor	47	Hi	med	no	NA	1	c	1	2	2	1	b	NA	a	1	buy	a	a	Thám tử lừng danh Co nan Nam Cao	yes	c	a	1	Thám tử lừng danh Co nan Truyện Kiều Truyện cổ tích
3274	3.5	43071	6	9	Male	7.25	0	0	0	2	2	1	NA	Bác sĩ	Doctor	Nông dân	Farmer	Labor	45	Hi	Nông dân	Farmer	Labor	39	Hi	med	yes	NA	1	c	1	2	1	0	e	NA	a	1	borrow	c	b	cậu bé bút chì Doraemon	yes	a	a	1	Một nhà Đi để trở về One Piece
4636	10.468	43074	5	9	Female	7.25	0	0	0	3	3	1	b	kế toán	Accountant	không xác định	NA	NA	NA	NA	nông dân	Farmer	Labor	45	UnderHi	med	no	NA	0	b	1	2	1	0	a	NA	a	1	borrow	d	a	hãy đặt trách nhiệm lên vai 1 nghệ thuật sống	yes	c	a	1	truyện kiều tấm cám hành tỏi
889	11.83	43071	11	7	Female	7.2	0	0	0	2	3	1	b	Đầu bếp	Chef	Nông dân	Farmer	Labor	45	UnderHi	Nông dân	Farmer	Labor	39	UnderHi	med	no	NA	1	b	1	1	1	0	e	NA	a	1	buy	a	a	Cho đi là còn mãi Tắt đèn	yes	a	a	1	Doraemon Thám tử lừng danh Conan Cây khế
903	11.97	43071	11	7	Female	7.2	0	0	0	1	3	1	a	Giáo viên	Teacher	Xây dựng	Worker	Labor	43	Hi	Công nhân	Worker	Labor	40	Hi	med	no	NA	1	a	0	1	1	0	a	NA	a	1	borrow	d	a	Tình cha Tham quan thiên nhiên	yes	d	a	1	10 vạn câu hỏi vì sao Lịch sử về các danh nhân Tình cảm gia đình
1003	14.76	43071	14	7	Female	7.2	0	0	0	3	3	1	a	Tự do	Freelancer	Công nhân	Worker	Labor	40	UnderHi	Công nhân	Worker	Labor	40	UnderHi	med	no	NA	1	b	1	2	2	1	d	NA	a	1	borrow	a	c	Thám tử lừng danh Conan Doraemon	yes	a	a	1	Thám tử lừng danh Conan Doraemon Học cho ai? Học để làm gì?
1023	9.124	43073	9	7	Male	7.2	0	0	0	3	3	1	a	Công an	Police officer	làm ruộng	Farmer	Labor	43	UnderHi	bán hàng	Seller	Labor	NA	UnderHi	med	no	NA	1	e	1	2	1	0	e	NA	a	1	buy	d	a	Sổ tay địa danh lịch sử 100 khám phá khoa học của Việt nam	yes	a	a	1	Kỹ năng sống cho học sinh Tập làm nhà phát minh Thuyền trưởng đơn vị
1031	9.133	43073	9	7	NA	7.2	0	0	0	3	3	1	b	Bác sĩ	Doctor	Thợ xây	Worker	Labor	43	UnderHi	bán hàng	Seller	Labor	42	Hi	med	no	NA	1	e	1	1	1	0	e	NA	a	1	borrow	b	d	hạt giống tâm hồn lịch sử bằng tranh	yes	a	a	1	Thuyền trưởng đơn vị Cách chọn trang phục Thuyền trưởng đơn vị
1244	1.105	43077	1	8	Male	7.2	0	0	0	3	3	1	d	Bộ đội	Soldier	Thợ mộc	Worker	Labor	48	UnderHi	Thợ mộc	Worker	Labor	46	UnderHi	med	no	NA	1	b	1	2	1	0	c	NA	a	1	borrow	d	a	Khoa học kì thú Tell Me What? Tôi muốn biết cái gì	yes	a	a	1	Dế Mèn phiêu lưu kí Bách khoa toàn thư Khúc đồng giao lấm láp
1252	1.114	43077	1	8	Male	7.2	0	0	0	2	1	1	d	Quân nhân	Soldier	Công nhân	Worker	Labor	40	UnderHi	Công nhân	Worker	Labor	40	Hi	med	no	NA	1	b	1	1	1	1	b	NA	a	1	buy	d	a	Albert Einstein Nobel	yes	b	a	1	Cậu bé bút chì Pokemon 7 viên ngọc rồng
2064	2.183	43076	4	8	Male	7.2	0	0	0	1	2	1	d	Giáo viên	Teacher	Nông dân	Farmer	Labor	NA	UnderHi	Nông dân	Farmer	Labor	NA	UnderHi	med	no	NA	1	f	1	2	1	0	c	NA	a	1	borrow	b	a	Hạt giống tâm hồn Lắng nghe hay nhận một viên đá	yes	a	a	1	co chó nhỏ mang giỏ hoa hồng Vũ Tú Nam Âm thanh kinh hồn
2258	8.265	43076	8	9	Female	7.2	0	0	0	2	3	0	b	Bác sĩ	Doctor	Nông dân	Farmer	Labor	42	UnderHi	Nông dân3	Farmer	Labor	38	Hi	med	no	NA	0	b	1	1	1	NA	a	NA	a	1	borrow	a	d	Hạt giống tâm hồn Chí Phèo	yes	a	a	1	Cậu bé bút chì Conan Tý Quậy
2522	16.46	43074	16	6	Male	7.2	0	0	0	1	3	1	d	giáo viên	Teacher	làm ruộng	Farmer	Labor	35	NA	làm ruộng	Farmer	Labor	35	NA	med	no	NA	1	b	1	1	1	0	f	truyện cười	a	1	borrow	a	a	điểm tựa của niềm tin những bước trưởng thành	yes	d	a	1	conan doraemon truyền thuyết mã lai
2936	16.388	43074	16	8	Female	7.2	0	0	0	4	4	1	b	Nhà văn	Writer	Nông dân	Farmer	Labor	51	UnderHi	Nông dân	Farmer	Labor	49	UnderHi	med	yes	NA	1	a	0	3	3	1	a	NA	a	1	borrow	a	a	Chọn một cách sống cho chính mình 11 lời khuyên dành cho thế hệ trẻ	yes	c	a	1	Văn học và tuổi trẻ Đi tìm vẻ đẹp của văn chương Lý luận văn học và đổi mới đọc hiểu tác phẩm
3498	3.1	43071	6	8	Female	7.2	0	0	0	2	3	1	f	Họa sĩ	Painter	Thợ xây	Worker	Labor	39	Hi	Nông dân	Farmer	Labor	40	UnderHi	rich	no	NA	1	f	1	1	1	0	c	NA	a	1	borrow	a	b	Nam Cao Những truyện hay nhất viết cho thiếu nhi Trần Hoài Dương	yes	b	a	1	10 vạn câu hỏi vì sao Những câu đố hay dành cho thiếu nhi Tấm cám
3615	16.108	43074	16	6	Male	7.2	0	0	0	1	3	1	c	thủ môn	Footballer	thợ xây	Worker	Labor	34	Hi	cắt tóc, bán hoa	Barber	Labor	34	NA	rich	no	NA	1	f	1	1	1	0	f	phiêu lưu trinh thám	a	1	borrow	c	a	thám tử lừng danh conan dragon ball	no	d	a	1	NA
3706	16.118	43074	16	6	Female	7.2	0	0	0	1	3	1	b	công an	Police officer	thợ xây	Worker	Labor	34	UnderHi	công nhân	Worker	Labor	33	UnderHi	med	yes	4000000	1	c	1	2	1	1	a	NA	a	1	borrow	b	a	gieo mầm tính cách - thật thà, xbt gieo mầm tính cách - tha thứ	yes	b	a	1	những điều giúp e học tốt môn văn những phát minh kì thú tác hại của ô nhiễm
3709	16.119	43074	16	6	Female	7.2	0	0	0	2	2	0	NA	công nhân	Worker	thợ xây	Worker	Labor	42	UnderHi	làm ruộng	Farmer	Labor	40	UnderHi	med	no	NA	0	b	1	1	1	0	a	NA	a	1	borrow	b	d	bài học vô giá một vài điều trong cuộc sống	yes	b	a	1	bạn có thể thay đổi thế giới cổ tích việt nam đi tìm hạnh phúc
3812	3.163	43071	6	6	Male	7.2	0	0	0	2	2	1	d	Kĩ sư	Engineer	Nông dân	Farmer	Labor	42	UnderHi	Nông dân	Farmer	Labor	38	UnderHi	med	NA	NA	NA	a	0	2	2	0	a	NA	a	1	buy	a	a	Doraemon Thế giới động vật	yes	b	a	1	150 bài văn hay Dế Mèn Thế giới động vật
4008	10.111	43074	5	6	Female	7.2	0	0	0	3	5	1	b	bác sĩ	Doctor	nông dân	Farmer	Labor	41	NA	nông dân	Farmer	Labor	40	UnderHi	med	no	NA	1	e	1	1	2	0	a	NA	a	1	buy	a	b	doraemon shin	yes	d	a	1	những bài văn hay những bài toán khó truyện cổ tích
4170	3.242	43071	6	6	Female	7.2	0	0	0	1	3	1	a	Bác sĩ	Doctor	Nông dân	Farmer	Labor	45	Hi	Nông dân	Farmer	Labor	37	Hi	rich	NA	NA	1	b	1	2	2	1	a	NA	a	1	buy	b	d	Học cách học tập Thoát nạn trong gang tấc	yes	a	a	1	Không gia đình Nâng cao tiếng Anh Conan
4709	10.487	43074	5	9	Female	7.2	0	0	0	3	4	1	d	không xác định	NA	không xác định	NA	NA	NA	NA	nông dân	Farmer	Labor	45	UnderHi	poor	no	NA	0	a	0	1	1	0	a	NA	a	1	borrow	d	b	truyện cổ tích truyện dân gian	yes	a	a	1	thi nhân việt nam chìa khóa vàng học trong sử sách
2743	8.134	43076	8	7	Female	7.15	0	0	0	2	4	1	b	Thiết kế thời trang	Fashion designer	Nông dân	Farmer	Labor	35	NA	Nông dân	Farmer	Labor	34	NA	med	no	NA	1	b	1	2	1	0	d	NA	a	1	borrow	a	a	Truyện tranh Khám phá thế giới	yes	d	a	1	Nữ hoàng Ai Cập Tiên khúc Doraemon
3183	15.79	43071	15	6	Female	7.15	0	0	0	2	3	NA	f	Bác sĩ	Doctor	Thợ xây	Worker	Labor	39	Hi	Nông dân	Farmer	Labor	36	Hi	NA	no	NA	1	b	1	2	2	0	a	NA	a	1	buy	a	a	hạt giống tâm hồn, kỹ năng dành cho học sinh	yes	a	a	1	Conan, doraemon, shin
3340	3.61	43071	6	9	Female	7.125	0	0	0	1	3	1	e	Bác sĩ	Doctor	Nông dân	Farmer	Labor	37	UnderHi	Nông dân	Farmer	Labor	35	UnderHi	med	no	NA	0	e	1	3	3	0	a	NA	a	1	borrow	d	c	Bác sĩ tốt nhất là chính mình Đắc nhân tâm	yes	a	a	1	Tôi và Phong Bát cơm cụ Hồ Trời mỗi ngày lại sáng
3357	3.68	43071	6	9	Female	7.125	0	0	0	4	5	1	e	Công an	Police officer	Nông dân	Farmer	Labor	46	UnderHi	Nông dân	Farmer	Labor	45	UnderHi	med	no	NA	1	c	1	1	1	0	a	NA	a	1	borrow	d	b	Đắc nhân tâm Tiếng chuông dưới đáy biển	yes	a	a	1	truyện kiều Ngôi nhà giữa nắng Mặt đường khát vọng
106	54	43075	2	9	Male	7.1	0	0	0	2	2	0	NA	phi công	Pilot	làm ruộng	Farmer	Labor	45	Hi	làm ruộng	Farmer	Labor	40	UnderHi	med	no	NA	0	f	1	1	1	0	a	NA	a	1	borrow	d	b	Nghìn lẻ một đêm Dế mèn phiêu lưu ký	no	d	a	1	Đô Rê Mon Hạt giống tâm hồn Thơ Tố Hữu
833	9.115	43073	9	7	Male	7.1	0	0	0	1	2	1	f	Công an	Police officer	làm ruộng ( đã mất)	Farmer	Labor	NA	UnderHi	Công nhân	Worker	Labor	45	Hi	med	no	NA	1	b	1	2	1	0	f	Truyện tranh	a	1	buy	d	d	55 cách tranh luận hiệu quả Lịch sử Việt Nam	yes	a	a	1	Lý THánh tông và Nguyên phi Ỷ lan Danh tướng Lý thường kiệt Lý triều dựng thăng long mở nghiệp
893	11.87	43071	11	7	Male	7.1	0	0	0	3	3	1	e	Công nhân	Worker	Nông dân	Farmer	Labor	45	UnderHi	Nông dân	Farmer	Labor	44	UnderHi	med	no	NA	1	c	1	1	1	0	a	NA	a	1	borrow	NA	a	Thuyền trưởng đơn vị Những tấm lòng cao cả	yes	a	a	1	Doraemon Thám tử lừng danh Conan Cây khế
1028	9.13	43073	9	7	Male	7.1	0	0	0	2	2	1	f	công nhân (nghề lái máy xúc)	Worker	Làm thợ	Worker	Labor	42	UnderHi	Công nhân	Worker	Labor	42	UnderHi	med	no	NA	1	b	1	1	2	0	d	NA	a	1	buy	b	d	100 khám phá vĩ đại nhất mọi thời đại	yes	c	a	1	Quà tặng cuộc sống Hạt giống tâm hồn Gió lạnh đầu mùa
1819	2.247	43076	4	8	Female	7.1	0	0	0	3	3	1	d	Bác sĩ	Doctor	Cán bộ cấp xã	Public servant	Intellectuals	49	UnderHi	Nông dân	Farmer	Labor	45	UnderHi	med	yes	4000000	1	a	0	2	2	0	a	NA	a	1	borrow	a	a	Truyện cổ tích Truyện Kiều	yes	a	a	1	Cậu bé bút chì Tiếng gọi nơi hoang dã Khát vọng miền xa
2247	8.254	43076	8	9	Female	7.1	0	0	0	3	3	1	a	Bác sĩ	Doctor	Công Nhân	Worker	Labor	47	Hi	Nông dân	Farmer	Labor	46	Hi	med	no	NA	1	f	1	1	1	0	f	Ngôn tình	a	1	borrow	a	a	Mãi mãi là bao xa Tình bạn và tình yêu	yes	a	a	1	Cậu bé bút chì Conan Tý Quậy
2776	8.11	43076	8	7	Female	7.1	0	0	0	1	2	1	b	NA	NA	Thợ sửa xe	Worker	Labor	38	UnderHi	Nông dân	Farmer	Labor	40	UnderHi	rich	no	NA	1	a	0	2	2	0	a	NA	a	1	borrow	b	a	Băng và lửa	yes	d	a	1	Búp sen xanh Thiên nhiên 55 cách để tự chọn
3034	8.29	43076	8	6	Male	7.1	0	0	0	1	2	1	b	Nhiếp ảnh gia	Photographer	Nông dân	Farmer	Labor	33	UnderHi	Công nhân	Worker	Labor	33	UnderHi	med	yes	NA	1	b	1	1	1	0	b	NA	a	1	borrow	NA	a	Cho tôi xin một vé đi tuổi thơ Cậu bé rắc rối	yes	d	a	1	Conan Doraemon Harry Potter
3423	16.101	43074	16	6	Female	7.1	0	0	0	1	2	1	b	nhà thiết kế	Designer	tổ chức đám cưới	Businessman	Intellectuals	45	UnderHi	làm ruộng	Farmer	Labor	35	UnderHi	med	NA	NA	1	a	0	2	2	NA	f	tiểu thuyết	a	1	buy	a	a	totto chan bên cửa sổ bồ câu không đưa thư	yes	b	a	1	ngồi khóc trên cây
3800	16.136	43074	16	6	Male	7.1	0	0	0	3	3	1	a	công an	Police officer	làm ruộng	Farmer	Labor	NA	UnderHi	làm ruộng	Farmer	Labor	NA	UnderHi	med	no	NA	1	a	0	2	1	0	a	NA	a	1	borrow	d	a	conan doremon	yes	d	a	1	đảo dấu vàng conan tý quậy
3927	16.19	43074	16	7	Male	7.1	0	0	0	5	5	1	d	cảnh sát giao thông	Police officer	làm ruộng	Farmer	Labor	62	UnderHi	làm ruộng	Farmer	Labor	43	UnderHi	med	no	NA	1	a	0	2	2	0	a	NA	a	1	borrow	a	a	100 phát minh lịch sử gia đình	yes	a	a	1	7 viên ngọc rồng ô long viện one piece
4031	10.134	43074	5	6	Female	7.1	0	0	0	2	2	1	NA	đầu bếp	Chef	công nhân	Worker	Labor	38	UnderHi	công nhân	Worker	Labor	34	UnderHi	med	yes	8000000	1	e	1	2	2	NA	f	về thiên nhiên	a	1	borrow	b	a	khám phá rừng thế giới ô nhiễm	yes	d	a	1	sách ước mơ sách hiếu thảo sách tự tin
4158	3.23	43071	6	6	Female	7.1	0	0	0	2	2	1	b	Bác sĩ	Doctor	Công Nhân	Worker	Labor	50	Hi	Nông dân	Farmer	Labor	38	UnderHi	med	no	NA	1	a	0	2	1	0	a	NA	a	1	borrow	d	a	Kĩ năng sống dành cho học sinh Những tấm gương hiếu học	yes	a	a	1	Những tấm gương hiếu thảo Những tấm gương dũng cảm
4172	3.245	43071	6	6	Female	7.1	0	0	0	1	3	1	d	Bác sĩ	Doctor	Nông dân	Farmer	Labor	41	UnderHi	Công nhân	Worker	Labor	34	UnderHi	med	yes	>5000000	1	b	1	1	2	1	d	NA	a	1	buy	b	a	Học cách học tập Phát triển khả năng suy luận	yes	d	a	1	Candy book Học cách sống Từ điển Anh Việt
4174	3.244	43071	6	6	Male	7.1	0	0	0	1	2	1	c	Bác sĩ	Doctor	Đã mất	NA	Labor	NA	NA	Công nhân	Worker	Labor	36	UnderHi	poor	NA	NA	NA	d	1	2	NA	1	f	Truyện tranh	a	1	borrow	b	a	Conan Doraemon	yes	d	a	1	Tý Quậy Thần đồng đất Việt Truyện cười
4191	3.263	43071	6	6	Female	7.1	0	0	0	2	3	1	b	Công an	Police officer	Thợ xây	Worker	Labor	44	UnderHi	Nông dân	Farmer	Labor	33	UnderHi	rich	NA	NA	NA	b	1	2	2	0	a	NA	a	1	borrow	d	c	Doraemon Conan	yes	b	a	1	Kĩ năng dạy võ Thần đồng đất Việt Trạng Quỳnh
4594	15.34	43071	15	9	Female	7.1	0	0	0	1	1	1	d	Phiên dịch viên	Interpreter	NA	NA	NA	NA	NA	Nông dân	Farmer	Labor	38	UnderHi	med	no	NA	0	f	1	1	1	0	f	truyện tranh	a	1	borrow	b	d	lão Hạc, Khát vọng sống	yes	a	a	1	Tý Quậy, Doraemon, Shin
43	6247	43074	3	9	Male	7	0	0	0	2	2	1	a	Kỹ sư	Engineer	Làm ruộng	Farmer	Labor	42	Hi	Làm ruộng	Farmer	Labor	38	Hi	med	yes	NA	1	f	1	1	1	0	b	NA	a	1	buy	d	a	Chạm tới giấc mơ Quà tặng cuộc sống	yes	d	a	1	Conan Doraemon Truyện Kiều
111	59	43075	2	9	Female	7	0	0	0	3	3	0	NA	công nhân	Worker	làm ruộng	Farmer	Labor	53	UnderHi	làm ruộng	Farmer	Labor	50	UnderHi	med	no	NA	0	b	1	1	1	0	e	NA	a	1	borrow	d	b	Truyện nhà xác Nghìn lẻ một đêm	yes	a	a	1	Dế mèn phiêu lưu ký Đội trưởng Mỹ, chiến binh mùa đông Harry Porter
133	75	43075	2	9	Female	7	0	0	0	2	3	1	b	chưa xác định	NA	làm ruộng	Farmer	Labor	47	UnderHi	làm ruộng	Farmer	Labor	40	UnderHi	rich	no	NA	0	e	1	2	1	0	a	NA	a	1	borrow	d	a	Truyện cổ tích Sách Văn học	yes	b	a	1	Học tốt ngữ văn
137	78	43075	2	9	Female	7	0	0	0	2	3	1	d	Kỹ sư	Engineer	làm ruộng	Farmer	Labor	40	UnderHi	làm ruộng	Farmer	Labor	36	UnderHi	med	no	NA	1	d	1	1	1	1	a	NA	a	1	borrow	d	b	Truyện cổ tích Truyện dân gian	yes	d	a	1	Học tốt ngữ văn Hướng dẫn nghề Nghệ thuật
275	6.182	43073	3	8	Female	7	0	0	0	1	3	1	e	Công an	Police officer	Làm ruộng	Farmer	Labor	36	UnderHi	Làm ruộng	Farmer	Labor	36	UnderHi	med	no	NA	1	a	0	2	1	1	a	NA	a	1	buy	b	c	Dế Mèn phiêu lưu ký Những quyển sách hay về môn hóa học	yes	a	a	1	Hiểu biết thêm về chủ tịch Hồ Chí Minh Bác Hồ ra đi tìm đường cứu nước Bác Hồ với các cháu thiếu niên nhi đồng trong vườn xanh
362	4.244	43075	2	7	Female	7	0	0	0	3	3	1	b	Giáo viên	Teacher	làm ruộng	Farmer	Labor	39	UnderHi	làm ruộng	Farmer	Labor	36	UnderHi	med	no	NA	1	b	1	2	1	0	a	NA	a	1	buy	a	a	Cô nan Shin cậu bé bút chì	yes	c	a	1	Đô rê mon Truyện cổ tích
369	4.251	43075	2	7	Male	7	0	0	0	3	3	1	a	Bác sĩ	Doctor	làm ruộng	Farmer	Labor	56	UnderHi	Làm ruộng	Farmer	Labor	51	UnderHi	rich	no	NA	1	b	1	2	2	1	a	NA	a	1	buy	d	b	Ngữ văn lớp 7 Soguku	yes	d	a	1	Pô ke mon Cô nan Thơ bút ngôn tứ tuyệt
374	4.256	43075	2	7	Female	7	0	0	0	1	3	1	e	thợ may	Worker	Làm ruộng	Farmer	Labor	46	UnderHi	Công nhân	Worker	Labor	42	UnderHi	med	no	NA	NA	b	1	2	2	0	a	NA	a	1	buy	a	c	101 câu chuyện học sinh cần vượt qua Đô rê mon	yes	b	a	1	NA
378	4.26	43075	2	7	Female	7	0	0	0	3	3	1	d	bác sĩ	Doctor	Làm ruộng	Farmer	Labor	45	UnderHi	làm ruộng	Farmer	Labor	43	UnderHi	med	no	NA	1	d	1	1	3	0	a	NA	a	1	buy	c	a	Shin cậu bé bút chì Truyện cổ tích	yes	d	a	1	Đô rê mon
379	4.261	43075	2	7	Female	7	0	0	0	3	4	1	d	Họa sĩ	Painter	Làm ruộng	Farmer	Labor	45	UnderHi	Nhân viên	Employee	Labor	40	UnderHi	med	no	NA	1	d	1	1	1	0	f	Truyện về thiên nhiên	a	1	borrow	c	a	cô nan Đô rê mon	yes	d	a	1	80 điều mẹ muốn nói với con gái Shin cậu bé bút chì Đô rê mon tập 50
384	4.266	43075	2	7	Male	7	0	0	0	1	2	1	b	đầu bếp	Chef	Làm ruộng	Farmer	Labor	38	UnderHi	Công nhân	Worker	Labor	37	UnderHi	rich	no	NA	0	b	1	1	1	0	a	NA	a	1	borrow	a	d	Dragon ball Đô rê mon	yes	a	a	1	Truyện cổ tích Shin Đô rê mon
392	4.274	43075	2	7	Male	7	0	0	0	1	3	0	e	thợ điện	Engineer	dược sĩ thú y	Vet	Intellectuals	36	Uni	Làm ruộng	Farmer	Labor	34	UnderHi	med	no	NA	1	b	1	1	1	0	e	NA	a	1	buy	a	d	Đô rê mon Cô nan	yes	a	a	1	Cô nan Chuyện cổ tích Việt Nam Chuyện chú cá lắm chiêu
438	4.32	43075	2	8	Male	7	0	0	0	2	3	0	NA	Kĩ sư	Engineer	Công nhân	Worker	Labor	43	UnderHi	Công nhân	Worker	Labor	41	Hi	med	no	NA	0	f	1	1	1	0	f	Truyện tranh	a	1	borrow	a	a	Đô rê mon Dragon ball	no	NA	a	1	Shin cậu bé bút chì Dragon ball
482	9.014	43073	9	6	Male	7	0	0	0	3	3	1	a	công nhân	Worker	Làm thợ	Worker	Labor	75	UnderHi	Làm ruộng	Farmer	Labor	67	UnderHi	med	no	3000000	1	a	0	1	1	0	b	NA	a	1	borrow	a	d	Chìa khóa vàng toán học Câu chuyện cuộc sống	yes	a	a	1	Kỹ năng chơi bóng rổ Dế mèn phiêu lưu ký Thế giới động vật
487	9.023	43073	9	6	Female	7	0	0	0	2	2	1	b	ca sĩ	Singer	kinh doanh ( cá)	Businessman	Labor	42	UnderHi	kinh doanh	Businessman	Labor	35	UnderHi	rich	no	NA	1	b	1	2	1	1	a	NA	a	1	borrow	a	d	Chìa khóa vàng Mặt nạ đen	yes	b	a	1	Tấm Cám Truyện cô gái đảm đang Cô gái vàng
488	9.024	43073	9	6	Male	7	0	0	0	4	4	1	e	công nhân	Worker	Làm thợ	Worker	Labor	50	UnderHi	Công nhân	Worker	Labor	48	UnderHi	med	yes	NA	1	b	1	1	1	NA	d	NA	a	1	borrow	c	a	Mặt nạ nước da đen Kỹ năng đánh bóng bàn	yes	d	a	1	One piece Naruto Đô rê mon
501	9.019	43073	9	6	Male	7	0	0	0	1	4	1	f	Công an	Police officer	nhân viên	Employee	Labor	37	UnderHi	kinh doanh ( ăn uống)	Businessman	Labor	35	UnderHi	rich	no	NA	1	b	1	1	2	1	a	NA	a	1	borrow	a	a	Kỹ năng đánh bóng bàn Mặt nạ đen Kỹ năng đánh bóng bàn	yes	b	a	1	Bảy viên ngọc rồng Thế giới động vật Kỹ năng đánh cầu lông
506	9.017	43073	9	6	Male	7	0	0	0	3	3	1	c	thợ điện	Engineer	Làm thợ	Worker	Labor	45	UnderHi	Làm ruộng	Farmer	Labor	43	UnderHi	med	yes	4500000	1	a	0	2	2	1	b	NA	a	1	borrow	a	d	Hạt giống tâm hồn	yes	b	a	1	Đô rê mon Dế mèn phiêu lưu ký Cô nan
507	9.025	43073	9	6	Male	7	0	0	0	1	3	1	f	công nhân	Worker	Làm thợ	Worker	Labor	37	UnderHi	Công nhân	Worker	Labor	35	UnderHi	med	yes	NA	1	c	1	2	2	1	e	NA	a	1	borrow	a	c	Sáng Chế công cụ Vũ Nam Tú	yes	a	a	1	Sự tích quả dưa hấu Aladin và cây đèn thần Alibaba và 40 tên cướp
519	9.034	43073	9	6	Female	7	0	0	0	1	2	1	b	Giáo viên	Teacher	làm ruộng	Farmer	Labor	38	Hi	Công nhân	Worker	Labor	34	UnderHi	rich	yes	10000000	1	b	1	1	2	0	a	NA	a	1	borrow	a	a	Lù A Chu Kỹ năng sống dành cho tuổi học sinh	yes	b	a	1	Đô rê mon Harry Porter Sherlock Homes
678	9.104	43073	9	7	Female	7	0	0	0	1	2	1	f	Bác sĩ	Doctor	Lái xe	Driver	Labor	41	UnderHi	Công nhân	Worker	Labor	38	UnderHi	med	yes	NA	1	a	0	2	2	0	d	NA	a	1	borrow	d	a	Bí mật về cơ thể 500 câu chuyện đạo đức gia đình	yes	a	a	1	500 câu chuyện đạo đức : tình thầy cô, lòng hiếu thảo Lịch sử việt nam : danh tướng Lý thường kiệt
741	11.113	43071	11	7	Male	7	0	0	0	3	4	0	a	Cầu thủ	Footballer	Xây dựng	Worker	Labor	43	UnderHi	Làm ruộng	Farmer	Labor	39	UnderHi	med	no	NA	1	c	1	2	2	0	c	NA	a	1	borrow	d	a	Conan Shin	yes	c	a	1	10 vạn câu hỏi vì sao Lịch sử ví ao 100 câu hay
773	11.59	43071	11	6	Male	7	0	0	0	1	0	1	a	Tiến sĩ	Scientist	Lái xe	Driver	Labor	36	Hi	Công nhân	Worker	Labor	31	Hi	rich	no	NA	1	b	1	1	1	0	d	NA	a	1	borrow	c	c	Conan Shin cậu bé bút chì	yes	a	a	1	Hạt giống tâm hồn Bao công xử án Conan
824	9.113	43073	9	7	Female	7	0	0	0	3	3	1	a	Giáo viên	Teacher	làm ruộng	Farmer	Labor	58	UnderHi	Làm ruộng	Farmer	Labor	48	UnderHi	med	no	NA	1	b	1	1	1	0	f	hướng dẫn học toán	a	1	buy	d	b	Lịch sử Việt nam Hạt giống tâm hồn	yes	b	a	1	500 câu chuyện đạo đức tình cha Núi lửa nóng hơn lửa TRuyện cổ tích Việt Nam
836	9.118	43073	9	7	Male	7	0	0	0	2	2	1	f	cầu thủ đá bóng	Footballer	Kinh doanh ( âm thanh ánh sáng)	Businessman	Labor	49	UnderHi	kinh doanh ( ăn uống)	Businessman	Labor	40	Hi	med	no	NA	1	f	1	1	2	0	f	Truyện tranh	a	1	buy	a	d	Nữ Vương khởi nghĩa Hạt giống tâm hồn	yes	b	a	1	Người Ai Cập Động đất động trời Thời kỳ đồ đá
840	9.14	43073	9	7	Male	7	0	0	0	1	2	1	f	ca sĩ	Singer	Công nhân	Worker	Labor	40	Hi	kinh doanh ( bán quần áo)	Businessman	Labor	35	Hi	rich	yes	NA	1	b	1	1	1	0	e	NA	a	1	borrow	b	b	Gió lạnh đầu mùa Mẹ sẽ không lạnh nữa	yes	d	a	1	Cánh buồm đỏ thắm Núi lửa nóng hơn núi lửa Phòng tránh tai nạn cho trẻ em và học sinh
983	14.37	43071	14	6	Male	7	0	0	0	1	2	1	e	Giáo viên	Teacher	Cán bộ cấp xã	Public servant	Intellectuals	45	Uni	Giáo viên	Teacher	Intellectuals	42	Uni	med	no	NA	1	b	1	2	1	0	a	NA	a	1	buy	a	c	Tôt-tô-chan Cô bé bên cửa sổ Sách kể chuyện	yes	b	a	1	Thám tử lừng danh Conan Doraemon 7 viên ngọc rồng
998	14.71	43071	14	7	Male	7	0	0	0	3	3	1	b	Tự do	Freelancer	Tự do	Freelancer	Labor	53	Hi	Tự do	Freelancer	Labor	45	UnderHi	med	no	NA	1	b	1	2	2	0	d	NA	a	1	buy	d	b	Giao tiếp ứng xử Kỹ năng tư duy sáng tạo	yes	b	a	1	Những phát minh thiên tài Những bài văn hay Những câu chuyện về lịch sử Việt Nam
999	14.72	43071	14	7	Male	7	0	0	0	1	2	1	b	Tự do	Freelancer	Xây dựng	Worker	Labor	41	UnderHi	Thợ may	Worker	Labor	40	UnderHi	rich	no	NA	1	b	1	1	1	1	NA	NA	a	1	borrow	a	a	Hạt giống tâm hồn Thiên tài	yes	b	a	1	Hướng dẫn dạy bơi Hướng dẫn chơi tennis Hướng dẫn chơi đá bóng
1001	14.74	43071	14	7	Female	7	0	0	0	2	2	1	NA	Tự do	Freelancer	Nông dân	Farmer	Labor	40	UnderHi	Công nhân	Worker	Labor	40	UnderHi	med	no	NA	1	a	0	1	2	0	d	NA	a	1	borrow	a	d	Vũ Tú Nam Chiếc lá thuộc bài	yes	b	a	1	Lịch sử Việt Nam Hội thề Lũng Nhai Họ Trịnh khởi nghiệp
1006	14.79	43071	14	7	Male	7	0	0	0	2	2	1	d	Công an	Police officer	Tự do	Freelancer	Labor	49	Hi	Công nhân	Worker	Labor	48	UnderHi	med	no	NA	1	a	0	2	1	0	b	NA	a	1	borrow	a	a	Thiên tài Học để làm gì?	yes	a	a	1	Quà tặng cuộc sống Chiếc lá thuộc bài Vũ Tú Nam
1015	14.88	43071	14	7	Male	7	0	0	0	1	1	1	a	Công an	Police officer	Tự do	Freelancer	Labor	34	UnderHi	Giáo viên	Teacher	Intellectuals	34	Uni	med	no	NA	1	a	0	2	1	0	b	NA	a	1	borrow	c	b	Lịch sử Việt Nam bằng tranh Toán học và vật lí	yes	b	a	1	Thám tử lừng danh Conan Thiên tài Vũ Tú Nam
1049	14.63	43071	14	7	Male	7	0	0	0	1	2	1	d	Giáo sư	Scientist	Tài xế	Driver	Labor	47	Hi	Nội trợ	Unemployed	Labor	38	Hi	med	yes	5000000	0	b	1	2	1	1	c	NA	a	1	borrow	b	d	Thế giới hóa học kì thú Bí mật về thế giới động vật	yes	c	a	1	Chuyện vui vật lí Bí mật toán học Kì quan thế giới thực vật
1066	14.1	43071	14	8	Female	7	0	0	0	2	3	1	b	Giáo viên	Teacher	Thủ công mĩ nghệ	Worker	Labor	39	Hi	Thủ công mĩ nghệ	Worker	Labor	34	Hi	med	yes	NA	1	f	1	1	2	1	a	NA	a	1	borrow	d	a	Những ngày thơ ấu Tắt đèn	yes	c	a	1	Tình bạn Đạo đức Hồ Chí Minh Bí quyết cuộc sống
1124	14.158	43071	14	9	Female	7	0	0	0	3	4	0	d	Y dược	Pharmacist	Xây dựng	Worker	Labor	45	Hi	Nông dân	Farmer	Labor	43	UnderHi	med	no	NA	1	b	1	1	2	0	f	Truyện tranh	a	1	buy	d	a	Cậu bé bút chì Doraemon	yes	a	a	1	Ngỏ lời tình yêu 7 viên ngọc rồng
1209	1.14	43077	1	6	Female	7	0	0	0	2	2	1	d	Ca sĩ	Singer	Thợ ảnh	Photographer	Intellectuals	64	UnderHi	Tiểu thương	Businessman	Labor	60	UnderHi	med	yes	NA	1	e	1	2	1	1	a	NA	a	1	buy	c	b	Bí mật học đường Doraemon	yes	b	a	1	Doraemon Trại hè đáng nhớ Cậu bé bút chì
1258	1.121	43077	1	8	Male	7	0	0	0	1	1	1	a	Đầu bếp	Chef	Thợ mộc	Worker	Labor	42	UnderHi	Nông dân	Farmer	Labor	35	UnderHi	med	no	NA	1	b	1	1	1	0	a	NA	a	1	buy	a	a	Thám tử lừng danh Conan Doraemon	yes	b	a	1	Thám tử lừng danh Conan Doraemon Cậu bé bút chì
1447	7.81	43071	7	6	Female	7	0	0	0	1	3	1	d	Giáo viên	Teacher	Thợ xây	Worker	Labor	40	UnderHi	Công nhân	Worker	Labor	38	UnderHi	med	yes	5000000	1	a	0	1	1	1	a	NA	a	1	borrow	b	a	Thiên nhiên - Trái Đất Nha bác học Marie Curie	yes	a	a	1	Những điều em chưa biết về Trái Đất Trái Đất phong phú như thế nào? Thiên nhiên rất quan trọng
1548	9.165	43073	9	7	Male	7	0	0	0	1	0	1	d	Chưa xác định	NA	Đã mất	NA	Labor	NA	NA	Làm ruộng	Farmer	Labor	41	UnderHi	med	no	NA	1	b	1	2	2	0	c	NA	a	1	borrow	a	b	Lịch sử Việt Nam bằng tranh Doraemon - Chú mèo máy đến từ tương lai	yes	d	a	1	Conan - Thám tử lừng danh Shin - Cậu bé bút chì Bí ẩn về các hành tinh
1562	9.171	43073	9	7	Female	7	0	0	0	2	2	1	b	NA	NA	Làm ruộng	Farmer	Labor	52	UnderHi	Làm ruộng	Farmer	Labor	36	UnderHi	med	no	NA	1	b	1	1	2	1	a	NA	a	1	borrow	a	a	Thiên thần nhỏ của tôi Lịch sử bằng truyện tranh	yes	a	a	1	Doraemon Câu đố Việt Nam Shin - Cậu bé bút chì
1564	9.155	43073	9	7	Male	7	0	0	0	2	2	1	d	Chưa xác định	NA	Lái xe	Driver	Labor	41	Hi	Bán hàng	Seller	Labor	39	UnderHi	med	no	NA	1	b	1	1	1	1	a	NA	a	1	borrow	a	a	Khát vọng nhìn xa Các phong tục nổi tiếng trên thế giới	yes	d	a	1	Doraemon Thám tử lừng danh Conan Shin - Cậu bé bút chì
1565	9.154	43073	9	7	Male	7	0	0	0	1	4	1	a	Chưa xác định	NA	Làm ruộng	Farmer	Labor	36	UnderHi	Công nhân	Worker	Labor	33	UnderHi	poor	no	NA	1	b	1	1	1	0	c	NA	a	1	buy	a	d	When Doraemon	yes	d	a	1	Thám tử lừng danh Conan Khủng long Doraemon
1566	9.156	43073	9	7	Female	7	0	0	0	2	3	1	a	Chưa xác định	NA	Làm ruộng	Farmer	Labor	49	UnderHi	Làm ruộng	Farmer	Labor	41	UnderHi	med	no	NA	1	b	1	1	1	0	c	NA	a	1	borrow	d	d	Thiên thần nhỏ của tôi Doraemon	yes	d	a	1	Thiên Văn Học Thám tử lừng danh Conan Doraemon
1567	9.157	43073	9	7	Female	7	0	0	0	1	2	1	d	Nhà khoa học	Scientist	Làm ruộng	Farmer	Labor	42	Hi	Làm ruộng	Farmer	Labor	37	Hi	med	no	NA	1	b	1	1	1	0	c	NA	a	1	borrow	c	d	Mèo hoang trong nghĩa địa Khoa học tự nhiên	yes	d	a	1	Shin - Cậu bé bút chì Thê giới khủng long cổ đại Truyện kinh dị
1579	9.191	43073	9	8	Female	7	0	0	0	2	2	1	b	Công an	Police officer	Bán hàng	Seller	Labor	53	Hi	Giáo viên	Teacher	Intellectuals	49	Uni	med	no	NA	1	f	1	2	1	1	a	NA	a	1	borrow	b	d	Truyện ngắn Nam Cao Vật lí vui	yes	a	a	1	Vua nói khoác Những kì tích y học Động đất sóng thần
1591	9.175	43073	9	8	Female	7	0	0	0	1	2	1	b	Bác sĩ	Doctor	Công chức xã	Public servant	Intellectuals	42	Uni	Giáo viên	Teacher	Intellectuals	36	Uni	med	no	NA	1	b	1	2	2	1	a	NA	a	1	borrow	c	d	Đứa trẻ giấy Xác chết hồi sinh	yes	a	a	1	Tắt đèn Truyện ngắn Nam Cao Trở về từ cõi âm
1601	9.206	43073	9	8	Female	7	0	0	0	2	3	1	d	Bác sĩ	Doctor	Nhòm kính	Worker	Labor	39	Hi	Làm ruộng	Farmer	Labor	35	UnderHi	med	no	NA	1	b	1	2	2	1	a	NA	a	1	buy	a	a	Truyện Kiều Doraemon	yes	b	a	1	Tuyển tập tác phẩm Nguyên Hồng 1000 câu hỏi Vì Sao Phương pháp giải toán Đại Số
1603	9.208	43073	9	8	Female	7	0	0	0	2	3	1	b	kinh doanh	Businessman	Công nhân	Worker	Labor	41	UnderHi	Công nhân	Worker	Labor	40	UnderHi	med	no	NA	1	b	1	2	1	0	a	NA	a	1	buy	a	a	Sách Doanh nhân Thám tử lừng danh Conan	yes	d	a	1	Truyện Kiều Truyện Văn học Việt Nam 1000 câu hỏi Vì Sao
1604	9.209	43101	9	8	Female	7	0	0	0	2	3	1	b	Bác sĩ	Doctor	Làm ruộng	Farmer	Labor	45	UnderHi	Làm ruộng	Farmer	Labor	40	UnderHi	med	no	NA	1	b	1	2	2	1	a	NA	a	1	borrow	a	a	Truyện Kiều Tuyển tập tác phẩm Nguyên Hồng	yes	a	a	1	Conan Doraemon 1000 câu hỏi Vì Sao
1610	9.231	43073	9	8	Female	7	0	0	0	2	3	1	d	Vũ công	Dancer	Đá đồ	NA	Labor	39	UnderHi	Đá đồ	NA	Labor	37	UnderHi	med	yes	10000000	1	f	1	2	1	0	d	NA	a	1	buy	d	d	Hạt giống tâm hồn Thám tử lừng danh Conan	yes	a	a	1	Hạt giống tâm hồn Truyện Kiều 1000 câu hỏi Vì Sao
1618	9.217	43073	9	8	Male	7	0	0	0	3	3	1	b	Ca sĩ	Singer	Làm ruộng	Farmer	Labor	42	UnderHi	Công nhân	Worker	Labor	36	Hi	med	yes	6000000	1	b	1	2	1	1	a	NA	a	1	buy	a	a	Truyện văn học Truyện tranh	yes	a	a	1	Truyện Kiều Thám tử lừng danh Conan Tuyển tập tác phẩm của Nguyên Hồng
1735	9.322	43073	9	9	Male	7	0	0	0	1	2	0	NA	Công an	Police officer	Làm ruộng	Farmer	Labor	NA	Hi	Công nhân	Worker	Labor	NA	UnderHi	med	no	NA	1	f	1	2	1	0	a	NA	a	1	buy	d	b	Doraemon Conan	yes	d	a	1	Mười vạn câu hỏi Vì Sao Phút dành cho cha Teen thành công
1752	9.335	43073	9	9	Female	7	0	0	0	2	2	0	NA	Tiếp viên Hàng Không	Flight attendant	Công nhân	Worker	Labor	44	Hi	Công nhân	Worker	Labor	38	Hi	med	no	NA	1	f	1	1	1	0	b	NA	a	1	buy	d	b	Khát vọng sống Kỹ năng sống dành cho học sinh	no	NA	a	1	Bụi phấn Kỹ năng tư duy sáng tạo Nghệ thuật giao tiếp thông minh
1826	2.251	43076	4	8	Male	7	0	0	0	2	4	1	d	Không xác định	NA	Nông dân	Farmer	Labor	49	UnderHi	Nông dân	Farmer	Labor	40	UnderHi	med	no	NA	1	a	0	2	1	0	e	NA	a	1	buy	d	a	Hạt giống tâm hồn và ý nghĩa cuộc sống Những sườn núi lấp lánh	yes	a	a	1	Thám tử lừng danh Conan Khát vọng nhìn xa Doraemon
1873	2.224	43076	4	8	Male	7	0	0	0	2	3	1	f	Giám đốc	Director	Xây dựng	Worker	Labor	45	UnderHi	Thợ may	Worker	Labor	45	UnderHi	med	no	10000000	1	a	0	2	2	0	b	NA	a	1	buy	a	a	Khát vọng nhìn xa Bí quyết teen thành công	no	c	a	1	NA
1879	2.232	43076	4	8	Male	7	0	0	0	2	2	1	a	Giáo viên	Teacher	Tài xế	Driver	Labor	47	Hi	Công nhân	Worker	Labor	42	Hi	rich	no	NA	1	a	0	2	1	1	b	NA	a	1	borrow	a	d	Những cách để trở nên thông minh hơn	yes	a	a	1	NA
1881	2.221	43076	4	8	Male	7	0	0	0	2	2	1	b	Tài chính kinh doanh	Businessman	Nông dân	Farmer	Labor	40	Uni	Nông dân	Farmer	Labor	40	Uni	med	yes	4000000	1	a	0	1	1	1	f	Cách học hay và đúng đắn	a	1	borrow	d	c	Cách học một cách thú vị và hiện thực với đời sống Cách ứng xử và thái độ giao tiếp	yes	a	a	1	Sách về cách học tốt Sách về danh nhân Sách về các nước trên thế giới
1891	2.219	43076	4	8	Male	7	0	0	0	2	2	0	f	Điện lực	Engineer	Xây dựng	Worker	Labor	45	UnderHi	Tự do	Freelancer	Labor	40	UnderHi	med	yes	7000000	1	b	1	1	1	0	e	NA	a	1	borrow	a	a	Giao tiếp ứng xử Cách làm nghề	yes	b	a	1	Ở đâu trên Trái Đất Phút dành cho cha
1893	2.231	43076	4	8	Male	7	0	0	0	1	2	1	f	Bác sĩ	Doctor	Thợ xây	Worker	Labor	36	UnderHi	Công nhân	Worker	Labor	32	UnderHi	med	no	NA	1	b	1	2	2	1	a	NA	a	1	buy	a	a	Hạt giống tâm hồn Cách giao tiếp ứng xử	yes	d	a	1	Dế Mèn phiêu lưu kí Tây Du kí Tắt đèn
2013	2.177	43076	4	8	Female	7	0	0	0	3	3	1	b	Bác sĩ	Doctor	Nông dân	Farmer	Labor	47	Hi	Nông dân	Farmer	Labor	46	Hi	med	no	NA	1	b	1	2	2	1	a	NA	a	1	borrow	d	a	Cho tôi xin một vé đi tuổi thơ Hạt giống tâm hồn	yes	b	a	1	Cô gái đến từ hôm qua Con không ngốc, con chỉ thông minh theo một cách khác
2072	2.65	43076	4	6	Female	7	0	0	0	1	3	1	c	Bác sĩ	Doctor	Nông dân	Farmer	Labor	37	UnderHi	Nông dân	Farmer	Labor	NA	Uni	med	no	NA	1	b	1	2	2	NA	e	NA	a	1	buy	a	d	Thám tử lừng danh Co nan Bạn có thể thay đổi cả thế giới	yes	a	a	1	Thám tử lừng danh Co nan Cậu bé bút chì Do raemon
2074	2.63	43076	4	6	Male	7	0	0	0	1	2	1	e	Bộ đội	Soldier	Nông dân	Farmer	Labor	34	Hi	Nông dân	Farmer	Labor	34	Hi	med	yes	NA	1	b	1	1	1	1	d	NA	a	1	buy	a	d	Vũ khí chiến tranh Chuyện lạ ngoài vũ trụ	yes	d	a	1	Thám tử lừng danh Co nan Do raemon To ri đảo hải tặc
2078	2.59	43076	4	6	Male	7	0	0	0	2	1	1	c	Công an	Police officer	Nông dân	Farmer	Labor	54	Hi	Nông dân	Farmer	Labor	47	Hi	med	yes	10000000	1	c	1	2	3	NA	a	NA	a	1	gift	a	d	Những điều lạ em muốn biết Bạn trai tháo vát	yes	c	a	1	Cậu bé bút chì Doraemon Năng lượng
2097	2.36	43076	4	6	Male	7	0	0	0	1	2	1	f	Bác sĩ	Doctor	Nông dân	Farmer	Labor	36	Hi	Nông dân	Farmer	Labor	32	Hi	med	yes	5000000	1	e	1	2	2	1	d	NA	a	1	borrow	b	b	Chuyện lạ về con người Dế Mèn phiêu lưu kí	yes	d	a	1	Doraemon Những bài văn tham khảo Sáng tạo
2104	2.28	43076	4	6	Female	7	0	0	0	3	3	NA	b	Bác sĩ	Doctor	Thợ xây	Worker	Labor	50	Hi	Nông dân	Farmer	Labor	51	Hi	med	yes	4000000	1	b	1	2	NA	0	f	Truyện cổ tích	a	1	borrow	b	c	Học cách hoàn thiện bản thân Dế Mèn phiêu lưu kí	yes	d	a	1	Những bài văn hay Kĩ năng sống
2107	2.171	43076	4	7	Female	7	0	0	0	1	1	1	e	Giáo viên	Teacher	Thợ xây	Worker	Labor	39	UnderHi	Buôn bán	Seller	Labor	36	Hi	med	no	NA	1	a	0	2	2	1	d	NA	a	1	borrow	a	a	Lịch sử Việt Nam Quà tặng cuộc sống	yes	b	a	1	Dế Mèn phiêu lưu kí Cậu bé bút chì Doraemon
2110	2.169	43076	4	7	Female	7	0	0	0	1	3	1	b	Họa sĩ	Painter	Thợ xây	Worker	Labor	35	UnderHi	Nông dân	Farmer	Labor	32	UnderHi	med	yes	5000000	1	c	1	3	3	1	a	NA	a	1	borrow	d	a	Khát vọng nhìn xa Tôi tài giỏi bạn cũng thế	yes	d	a	1	Nấu ăn Truyện cổ tích Sách dạy nói các tiếng ngoại ngữ
2117	2.162	43076	4	7	Female	7	0	0	0	3	4	1	f	Giáo viên	Teacher	Nông dân	Farmer	Labor	41	UnderHi	Nông dân	Farmer	Labor	40	UnderHi	med	no	NA	1	a	0	1	2	0	a	NA	a	1	buy	b	c	Hạt giống tâm hồn Khát vọng nhìn xa	yes	a	a	1	Hướng dẫn học tiếng Hàn Sách danh nhân Sách về tự nhiên
2129	2.15	43076	4	7	Female	7	0	0	0	3	5	1	d	Giáo viên	Teacher	Thợ xây	Worker	Labor	40	UnderHi	Nông dân	Farmer	Labor	38	UnderHi	med	yes	NA	1	b	1	2	3	1	f	Truyện tranh	a	1	borrow	a	c	Thiên thần nhỏ của tôi Nữ sinh	yes	b	a	1	Tiếng gọi nơi hoang dã Doraemon Cậu bé bút chì
2132	2.147	43076	4	7	Male	7	0	0	0	2	2	1	f	Điện tử	Engineer	Thợ xây	Worker	Labor	52	Hi	Nông dân	Farmer	Labor	NA	Hi	med	no	NA	1	a	0	2	1	0	f	Kĩ thuật	a	1	borrow	b	c	Khoa học kĩ thuật	yes	b	a	1	Sáng tạo
2142	2.137	43076	4	7	Male	7	0	0	0	1	1	1	f	Kỹ Thuật	Engineer	Thợ xây	Worker	Labor	NA	PostGrad	công ty	Businessman	Labor	NA	UnderHi	med	NA	NA	1	b	1	1	1	0	d	NA	a	1	buy	a	a	sáng chế công cụ chìa khóa vàng	yes	c	a	1	Conan Cậu bé bút chì Doraemon
2152	2.127	43076	4	7	Male	7	0	0	0	3	3	1	f	Thợ xây	Worker	Chăn nuôi	Herder	Labor	41	UnderHi	công ty	Businessman	Labor	42	UnderHi	med	yes	NA	1	a	0	2	1	1	b	NA	a	1	buy	a	b	What Chìa khóa vàng	yes	b	a	1	Conan Doraemon Sách khoa học
2155	2.124	43076	4	7	Male	7	0	0	0	3	0	1	e	Sửa chữa ô tô	Repairman	Thợ xây	Worker	Labor	46	Hi	Nông dân	Farmer	Labor	42	Hi	med	yes	5000000	1	b	1	2	2	0	f	Truyện	a	1	buy	c	c	Doraemon Giai thoại các tác giả văn chương	yes	d	a	1	Doraemon Conan Cậu bé bút chì
2156	2.123	43076	4	7	Male	7	0	0	0	1	2	1	a	Kế toán	Accountant	Thợ xây	Worker	Labor	39	Hi	Thợ may	Worker	Labor	37	Hi	rich	yes	NA	1	NA	1	2	1	1	b	NA	a	1	borrow	d	d	Danh nhân Việt Nam Chìa khóa vàng	yes	b	a	1	Nguyễn Công Hoan Quà tặng cuộc sống Để có 1 tâm hồn đẹp
2157	2.122	12/07/22017	4	7	Female	7	0	0	0	2	3	1	b	Giáo viên	Teacher	Thợ xây	Worker	Labor	34	NA	công ty	Businessman	Labor	34	NA	med	NA	NA	1	c	1	2	2	1	a	NA	a	1	borrow	b	NA	Quà tặng cuộc sống Học cho ai, học làm gì	yes	a	a	1	Doraemon Conan Bóng mát tâm hồn
2158	2.121	43076	4	7	Male	7	0	0	0	2	2	1	f	Công an	Police officer	Tài xế chở hàng	Driver	Labor	44	NA	công ty	Businessman	Labor	44	NA	med	yes	NA	1	b	1	1	2	0	a	NA	a	1	buy	b	b	Hạt giống tâm hồn Quà tặng cuộc sống	no	a	a	1	Quà tặng cuộc sống Bóng mát tâm hồn Doraemon
2159	2.12	43076	4	7	Female	7	0	0	0	2	2	NA	b	Thiết kế thời trang	Fashion designer	NA	NA	NA	NA	NA	công ty	Businessman	Labor	NA	UnderHi	poor	no	NA	1	f	1	2	3	1	e	NA	a	1	buy	a	d	Quà tặng cuộc sống Vượt lên số phận	yes	d	a	1	Học cho ai, học để làm gì Giao tiếp ứng xử Chìa khóa vàng
2182	2.96	43076	4	7	Male	7	0	0	0	2	2	1	e	Giáo viên	Teacher	Thợ mộc	Worker	Labor	45	UnderHi	Thợ may	Worker	Labor	41	UnderHi	med	no	NA	1	b	1	1	2	1	a	NA	a	1	buy	a	d	Lão Hạc Chiếc lược ngà	yes	c	a	1	Lão Hạc Chiếc lược ngà Truyện Kiều
2228	8.279	43076	8	8	Male	7	0	0	0	4	4	1	d	Đầu bếp	Chef	Công Nhân	Worker	Labor	49	Hi	Công nhân	Worker	Labor	42	UnderHi	med	no	NA	1	b	1	2	1	0	a	NA	a	1	buy	c	d	Conan Truyện Tranh	no	d	a	1	Khám phá vũ trụ Khám phá rừng kì quan thế giới
2252	8.259	43076	8	9	Female	7	0	0	0	2	3	1	a	Bộ đội	Soldier	Bộ đội	Soldier	Labor	45	Hi	Nông dân	Farmer	Labor	40	Hi	med	no	NA	1	a	0	2	2	0	f	Truyện ngôn tình	a	1	borrow	d	a	Bụi phấn Kĩ năng tư duy sáng tạo	yes	a	a	1	Phải lấy người như anh Mãi mãi là bao xa Cậu bé bút chì
2257	8.264	43076	8	9	Female	7	0	0	0	2	2	0	NA	Bác sĩ	Doctor	Thợ xây	Worker	Labor	41	UnderHi	Công nhân	Worker	Labor	39	UnderHi	med	no	NA	1	f	1	1	2	0	f	Truyện thiếu nhi	a	1	borrow	a	a	Trong gia đình Nghệ thuật giao tiếp trong cuộc sống	no	a	a	1	Cậu bé bút chì Conan Tý Quậy
2280	8.245	43076	8	9	Male	7	0	0	0	2	3	1	d	Kĩ sư xây dựng	Engineer	Công Nhân	Worker	Labor	47	UnderHi	Công nhân	Worker	Labor	32	UnderHi	med	no	NA	1	c	1	1	1	0	a	NA	a	1	borrow	d	c	Sinh học lí thú Chìa khóa vàng	yes	a	a	1	Bỏ trốn Toán học và nghệ thuật Hóa học cơ bản
2354	8.196	43076	8	8	Female	7	0	0	0	1	3	1	b	Bác sĩ	Doctor	Nông dân	Farmer	Labor	37	UnderHi	Nông dân	Farmer	Labor	37	UnderHi	med	no	NA	0	e	1	2	1	NA	a	NA	a	1	borrow	a	d	Hãy đặt trách nhiệm lên vai Không gia đình	yes	a	a	1	Kĩ năng sống Truyện Kiều Tập nghị luận và phê bình văn học
2573	8.156	43076	8	7	Female	7	0	0	0	1	2	1	d	Kế toán	Accountant	Công Nhân	Worker	Labor	39	Hi	Công nhân	Worker	Labor	34	Hi	med	no	NA	1	f	1	2	2	0	NA	NA	a	1	borrow	a	b	Mắt biếc Bí ẩn cơ thể người	yes	d	a	1	Lịch sử Ai Cập Các hành tinh trên thế giới Dế Mèn
2574	13.68	43073	13	6	Male	7	0	0	0	1	2	1	e	Cầu thủ bóng đá	Footballer	xây dựng	Worker	Labor	41	UnderHi	Công nhân	Worker	Labor	35	UnderHi	med	no	NA	1	d	1	2	1	0	e	NA	a	1	borrow	a	d	7 viên ngọc rồng doraemon	yes	d	a	1	lịch sử và địa lí tê giác đen ô long viện
2682	5.101	43075	10	8	Female	7	0	0	0	2	2	0	f	Điện	Engineer	Đội trưởng	Manager	Labor	41	Hi	Công nhân	Worker	Labor	40	Hi	rich	yes	16000000	1	f	1	2	1	1	c	NA	a	1	borrow	d	b	Khoa học tự nhiên Khám phá vũ trụ	yes	b	a	1	NA
2690	5.109	43075	10	8	Female	7	0	0	0	3	4	1	d	Văn phòng	Employee	Công nhân	Worker	Labor	42	UnderHi	Công nhân	Worker	Labor	39	UnderHi	med	yes	NA	1	b	1	2	1	0	d	NA	a	1	gift	d	NA	Cách làm người Khám phá thế giới	yes	a	a	1	Những tấm lòng cao cả Conan Sách về hóa học
2765	8.99	43076	8	7	Male	7	0	0	0	3	3	1	b	Cầu thủ bóng đá	Footballer	Thợ điện	Engineer	Labor	43	UnderHi	Công nhân	Worker	Labor	41	UnderHi	med	no	NA	1	b	1	3	3	1	b	NA	a	1	borrow	a	d	NA	yes	d	a	1	Cậu bé bút chì Doraemon 55 cách để tự tin
2819	15.52	43071	15	6	Male	7	0	0	0	1	1	1	a	Bộ đội	Soldier	Công nhân xây dựng	Worker	Labor	37	Hi	Công nhân	Worker	Labor	35	UnderHi	med	no	NA	1	a	0	1	1	0	e	NA	a	1	buy	a	c	âm thanh kinh hồn, hạt giống tâm hồn	yes	d	a	1	doraemon, conan, Shin cậu bé bút chì
2829	16.291	43074	16	7	Male	7	0	0	0	3	3	0	NA	Giáo viên	Teacher	Nông dân	Farmer	Labor	40	UnderHi	Nông dân	Farmer	Labor	38	UnderHi	rich	no	NA	1	a	0	1	1	0	a	NA	a	1	buy	a	a	Naruto Doraemon	yes	d	a	1	Conan 7 viên ngọc rồng Đảo hải tặc
2830	15.57	43071	15	6	Male	7	0	0	0	1	3	1	d	Bác sĩ	Doctor	Nông dân	Farmer	Labor	50	UnderHi	Nông dân	Farmer	Labor	48	UnderHi	med	no	NA	1	a	0	2	1	0	e	NA	a	1	gift	b	a	hạt giống tâm hồn, những chàng trai xấu tính	yes	a	a	1	doraemon, conan, Shin cậu bé bút chì
2889	8.73	43076	8	6	Male	7	0	0	0	3	3	0	b	Đầu bếp	Chef	Nông dân	Farmer	Labor	45	UnderHi	Nông dân	Farmer	Labor	43	UnderHi	med	no	NA	1	e	1	1	1	0	f	Tý Quậy	a	1	buy	a	d	Trạng Quỳnh Cho và nhận	yes	c	a	1	Trạng Quỳnh Học trò cười Danh nhân thế giới
2910	16.356	43075	16	8	Female	7	0	0	0	1	1	1	d	Bác sĩ	Doctor	Nông dân	Farmer	Labor	48	UnderHi	Nông dân	Farmer	Labor	46	Hi	med	no	NA	0	f	1	2	1	0	a	NA	a	1	borrow	a	a	Cổ tích thiếu nhi Tu dưỡng đạo đức	yes	b	a	1	Tôi muốn biết vì sao Tôi muốn biết khi nào Tôi muốn biết ở đâu
2915	16.361	43075	16	8	Male	7	0	0	0	1	2	1	b	Giám đốc	Director	Nông dân	Farmer	Labor	37	NA	Nông dân	Farmer	Labor	35	Uni	med	no	NA	0	c	1	2	1	0	a	NA	a	1	borrow	a	a	Thạch Sanh Cô bé bán diêm	yes	a	a	1	Chú cuội Shin Doraemon
2923	16.372	43075	16	8	Male	7	0	0	0	2	4	NA	d	Công an	Police officer	Nông dân	Farmer	Labor	43	UnderHi	Nông dân	Farmer	Labor	41	UnderHi	med	NA	NA	1	b	1	1	1	0	a	NA	a	1	borrow	d	b	Sách danh nhân Sách nghệ thuật	yes	d	a	1	Truyện văn học Hướng dẫn nghề Ngoại ngữ
2990	8.55	43076	8	6	Male	7	0	0	0	1	2	1	c	Ca sĩ	Singer	Nông dân	Farmer	Labor	36	Hi	Nông dân	Farmer	Labor	NA	Hi	rich	NA	NA	1	a	0	2	1	0	d	NA	a	1	borrow	a	a	Doraemon Conan	yes	a	a	1	Tý Quậy Conan Doraemon
3011	15.64	43071	15	6	Female	7	0	0	0	2	2	1	c	Giáo viên	Teacher	Nông dân	Farmer	Labor	45	Hi	Nông dân	Farmer	Labor	37	Hi	rich	yes	NA	1	a	0	1	2	1	a	NA	a	1	borrow	a	c	điểm tựa của niềm tin, doraemon	yes	a	a	1	Doraemon, văn học tuổi trẻ, Shin cậu bé bút chì
3094	16.427	43074	16	8	Female	7	0	0	0	1	3	1	c	Giáo viên	Teacher	Thợ xây	Worker	Labor	35	UnderHi	Nông dân	Farmer	Labor	35	UnderHi	med	no	NA	1	f	1	2	2	0	e	NA	a	1	buy	b	c	Conan Cửa sổ tâm hồn	yes	a	a	1	Những điều em chưa biết Những điều lí thú thú về con người Conan
3160	15.69	43071	15	6	Male	7	0	0	0	1	2	1	b	Kĩ sư	Engineer	Công nhân	Worker	Labor	37	Hi	Công nhân	Worker	Labor	35	Hi	rich	no	NA	1	b	1	2	2	0	a	NA	a	1	buy	a	b	Bác sĩ aboli, doraemon	yes	a	a	1	Conan, doraemon, shin
3161	16.469	43074	16	8	Female	7	0	0	0	1	3	1	b	Nhà văn	Writer	Nghề tự do	Freelancer	Labor	43	Uni	Công nhân	Worker	Labor	35	UnderHi	rich	no	NA	1	a	0	1	1	0	a	NA	a	1	borrow	b	d	Những ngày thơ ấu Học những kĩ năng để thành công	yes	a	a	1	NA
3162	15.7	43071	15	6	Female	7	0	0	0	1	3	NA	d	Giáo viên	Teacher	Nông dân	Farmer	Labor	36	Hi	Nông dân	Farmer	Labor	35	Hi	med	no	NA	1	b	1	1	1	0	f	truyện tranh	a	1	borrow	a	a	Ngụ ngôn dân gian Đông Tây, Hạt giống tâm hồn	yes	a	a	1	Conan, doraemon, Hạt giống tâm hồn
3164	15.71	43071	15	6	Female	7	0	0	0	3	3	0	f	Vẽ	Painter	Nông dân	Farmer	Labor	41	Hi	Nông dân	Farmer	Labor	39	Hi	med	no	NA	0	b	1	1	1	0	d	NA	a	1	borrow	a	c	doraemon, shin	yes	d	a	1	NA
3172	15.76	43071	15	6	Female	7	0	0	0	2	2	1	d	Bác sĩ	Doctor	Nông dân	Farmer	Labor	45	Hi	Nông dân	Farmer	Labor	41	Hi	med	no	NA	1	b	1	2	2	1	a	NA	a	1	gift	a	a	câu lạc bộ thắp sáng ước mơ, hãy lắng nghe hay nhận một hòn đá quà tặng cuộc sống	yes	a	a	1	Bài học vô giá, doraemon, shin
3177	16.479	43074	16	8	Female	7	0	0	0	4	4	1	b	Bác sĩ	Doctor	Nông dân	Farmer	Labor	39	UnderHi	Nông dân	Farmer	Labor	35	UnderHi	med	yes	NA	1	c	1	2	2	0	a	NA	a	1	borrow	d	c	Lịch sử Việt Nam Những câu chuyện hay giúp trẻ trưởng thành trí tuệ	yes	a	a	1	10 vạn câu hỏi vì sao The lost shoe Thế giới bí mật của Ari ate
3184	15.8	43071	15	6	Male	7	0	0	0	1	1	1	d	công an	Police officer	Công nhân	Worker	Labor	38	Hi	Công nhân	Worker	Labor	35	Hi	med	no	NA	1	a	0	2	2	0	f	truyện tranh	a	1	buy	a	d	doraemon, shin	yes	b	a	1	Conan, doraemon, shin
3232	16.486	43074	16	8	Female	7	0	0	0	4	4	1	b	viết tiểu thuyết	Writer	không xác định	NA	NA	NA	NA	nông dân	Farmer	Labor	50	Hi	poor	no	NA	NA	a	0	1	1	0	a	NA	a	1	borrow	b	b	dế mèn phưu lưu kí truyện dành cho thiếu nhi của tác giả ma văn kháng	yes	d	a	1	truyện danh cho thiếu nhi của nhà văn võ quảng ngày em đến trường cổ tích việt nam
3265	3.41	43071	6	9	Male	7	0	0	0	2	2	1	f	Ca sĩ	Singer	Công Nhân	Worker	Labor	43	Hi	Công nhân	Worker	Labor	40	Hi	med	no	NA	1	b	1	1	1	0	d	NA	a	1	buy	c	a	Cậu bé bút chì Doraemon	no	NA	a	1	Truyện Kiều Cổ tích Conan
3339	16.566	43074	16	9	Female	7	0	0	0	3	4	1	d	bác sĩ	Doctor	nông dân	Farmer	Labor	53	UnderHi	nông dân	Farmer	Labor	48	UnderHi	med	no	NA	1	d	1	2	1	0	e	NA	a	1	buy	d	a	giai thoại các tác giả văn chương việt nam khám phá thế giới	yes	a	a	1	sách dạy tiếng anh tìm hiểu nền văn hóa thế giới sách hướng dẫn nghề
3346	3.64	43071	6	9	Female	7	0	0	0	3	3	1	e	Bộ đội	Soldier	Không xác định	NA	NA	NA	NA	Buôn bán	Seller	Labor	40	NA	med	no	NA	1	e	1	3	2	0	b	NA	a	1	buy	d	a	Đắc nhân tâm Hạt giống tâm hồn Việt	yes	a	a	1	Cho tôi xin một vé đi tuổi thơ sherlock Homles
3355	16.6	43074	16	6	Male	7	0	0	0	3	3	1	f	nghiên cứu máy móc	Scientist	làm ruộng	Farmer	Labor	52	UnderHi	làm ruộng	Farmer	Labor	51	UnderHi	med	no	NA	0	a	0	2	1	0	f	kỹ thuật	a	1	borrow	c	a	hướng dẫn nghê tin học/ kỹ thuật	yes	a	a	1	hướng dẫn nghề tin học/ kỹ thuật truyện văn học
3365	16.66	42343	16	6	Female	7	0	0	0	1	3	1	c	giáo viên	Teacher	làm ruộng	Farmer	Labor	39	UnderHi	làm ruộng	Farmer	Labor	37	UnderHi	med	no	NA	1	e	1	1	1	0	a	NA	a	1	borrow	a	a	hạt giống tâm hồn quà tặng cuộc sống	yes	a	a	1	conan thám tử lừng danh shin cậu bé bút chì doraemon chú mèo máy đến từ tương lai
3391	16.79	43074	16	6	Male	7	0	0	0	2	3	1	b	công an	Police officer	xây dựng	Worker	Labor	45	Hi	công nhân	Worker	Labor	42	Hi	med	no	NA	1	b	1	2	2	0	a	NA	a	1	borrow	b	a	kiến thức đại dương hạt giống tâm hồn	yes	a	a	1	truyện văn học tin học, kĩ thuật
3491	3.93	43071	6	8	Male	7	0	0	0	1	1	NA	a	Cầu thủ bóng đá	Footballer	Không xác định	NA	NA	NA	NA	Nông dân	Farmer	Labor	31	UnderHi	med	no	NA	1	f	1	1	1	1	a	NA	a	1	borrow	a	d	dấy nghiệp Trung Hưng thống nhất non sông Lý triều dựng Thăng Long mở nghiệp	yes	d	a	1	Dế Mèn Bồi dưỡng học sinh giỏi lý Giao tiếp ứng xử
3538	15.153	43071	15	7	Male	7	0	0	0	4	4	1	d	công an	Police officer	Nông dân	Farmer	Labor	43	Hi	Nông dân	Farmer	Labor	40	Hi	med	no	NA	1	a	0	2	2	0	d	NA	a	1	borrow	b	b	thế giới động vật, lịch sử	yes	b	a	1	khoa học viễn tưởng, kỹ năng sống, hạt giống tâm hồn
3544	15.159	43071	15	7	Female	7	0	0	0	3	3	1	e	Giáo viên	Teacher	Nông dân	Farmer	Labor	56	Hi	Nông dân	Farmer	Labor	55	Hi	med	no	NA	1	a	0	1	1	NA	a	NA	a	1	borrow	b	a	thật thà, động vật thực vật	yes	b	a	1	ngụ ngôn cổ điển phong phú, sách về khoa học môi trường, sách về lịch sủ nước mình
3571	15.166	43071	15	7	Female	7	0	0	0	2	3	1	e	Diễn viên	Actor	Nông dân	Farmer	Labor	40	UnderHi	Nông dân	Farmer	Labor	34	UnderHi	med	no	NA	1	f	1	2	1	0	e	NA	a	1	borrow	b	c	học cách làm việc, giám chấp nhận	yes	a	a	1	chú bé rắc rối, những cuốn sách hay về thiên nhiên, xã hội
3574	15.169	43071	15	7	Female	7	0	0	0	3	3	1	a	Bác sĩ	Doctor	Nông dân	Farmer	Labor	43	Hi	Nông dân	Farmer	Labor	43	Hi	med	no	NA	1	e	1	2	2	1	a	NA	a	1	borrow	b	a	gieo mầm tính cách thật thà, học cách làm việc	yes	b	a	1	thiên nhiên ô nhiễm, tình cha ấm áp, kỹ năng sống dành cho học sinh
3585	3.134	43071	6	8	Female	7	0	0	0	2	2	1	d	Công nhân	Worker	Thợ xây	Worker	Labor	40	UnderHi	công ty	Businessman	Labor	36	Hi	med	no	NA	1	b	1	2	1	0	c	NA	a	1	buy	d	a	Hạt giống tâm hồn Kĩ năng sống	yes	a	a	1	Vật lí Điện học thiên nhiên hoang dã
3623	16.112	43074	16	6	Male	7	0	0	0	1	2	1	a	công an	Police officer	thợ xây	Worker	Labor	31	UnderHi	làm ruộng	Farmer	Labor	NA	UnderHi	med	no	NA	0	f	1	2	2	0	e	NA	a	1	borrow	d	b	thế giới động vật khả năng quan sát	yes	b	a	1	khả năng quan sát
3665	15.177	43071	15	7	Female	7	0	0	0	2	3	1	b	Bộ đội	Soldier	Nông dân	Farmer	Labor	43	Hi	Công nhân	Worker	Labor	39	Hi	med	no	NA	1	a	0	2	2	0	a	NA	a	1	borrow	b	a	chú bé rắc rối, tình cha ấm áp	yes	b	a	1	Thiên nhiên ô nhiễm, kỹ năng sống dành cho học sinh, chiếc chìa khóa vàng
3696	13.261	43073	13	8	Male	7	0	0	0	1	2	1	c	không xác định	NA	nông dân	Farmer	Labor	38	UnderHi	giáo viên	Teacher	Intellectuals	NA	PostGrad	med	no	NA	1	f	1	2	1	NA	f	khác	a	1	buy	b	d	shin doraemon	no	NA	a	1	NA
3699	13.263	43073	13	8	Female	7	0	0	0	1	2	0	NA	không xác định	NA	nông dân	Farmer	Labor	NA	NA	công nhân	Worker	Labor	NA	NA	rich	yes	20000000	1	b	1	1	2	0	b	NA	a	1	buy	b	d	7 viên ngọc rồng doraemon	yes	c	a	1	chuyện ngày xưa truyện cổ tích nhật kí trong tù
3717	15.19	43071	15	8	Female	7	0	0	0	1	2	1	c	Nhân viên văn phòng	Employee	Thợ xây	Worker	Labor	41	Hi	Nông dân	Farmer	Labor	39	Hi	med	no	NA	1	b	1	2	1	1	NA	NA	a	1	borrow	b	c	Học ăn, học nói, học gói, học mở; Ngữ pháp tiếng anh	yes	a	a	1	Truyện kiều, tắt đèn, dạy nấu ăn
3731	16.124	43074	16	6	Female	7	0	0	0	2	3	1	b	nông nghiệp	Farmer	thợ xây	Worker	Labor	41	UnderHi	phụ hồ	Worker	Labor	40	UnderHi	med	no	NA	0	a	0	1	1	0	a	NA	a	1	borrow	b	a	say mê học hỏi kiến thức thực vật	no	NA	a	1	kiến thức đại dương kiến thức động vật kiến thức cơ thể người
3784	3.161	43071	6	8	Female	7	0	0	0	4	4	1	c	Bác sĩ	Doctor	NA	NA	NA	NA	NA	Nông dân	Farmer	Labor	NA	UnderHi	med	no	NA	1	b	1	1	1	0	a	NA	a	1	borrow	a	a	Mỗi ngày tôi chọn một niềm vui Ngoại ngữ tiếng anh	yes	b	a	1	Harry Potter Đắc nhân tâm
3796	16.132	43074	16	6	Female	7	0	0	0	2	2	1	b	nhà thiết kế thời trang	Fashion designer	thợ xây	Worker	Labor	NA	UnderHi	NA	NA	NA	NA	NA	med	no	NA	1	a	0	3	1	0	a	NA	a	1	buy	b	a	thật thà lịch sự	yes	d	a	1	tử tế kiên trì công bằng
3811	3.162	43071	6	6	Male	7	0	0	0	2	2	1	b	Công an	Police officer	Thợ xây	Worker	Labor	39	UnderHi	Nông dân	Farmer	Labor	36	UnderHi	poor	no	NA	1	d	1	2	2	1	f	Truyện tranh	a	1	buy	a	a	Từ điển Doraemon	yes	d	a	1	Thế giới động vật 150 bài văn hay Dế Mèn
3840	3.191	43071	6	7	Male	7	0	0	0	2	4	1	f	Kĩ sư	Engineer	Bộ đội	Soldier	Labor	41	Hi	Nông dân	Farmer	Labor	NA	UnderHi	med	no	NA	1	b	1	1	1	1	f	Truyện tranh	a	1	buy	a	d	Cho đi là còn mãi Những tấm lòng cao cả	yes	a	a	1	Búp sen xanh Khám phá cơ thể người Truyện Kiều
3855	16.157	43074	16	6	Male	7	0	0	0	2	3	1	f	cảnh sát	Police officer	thợ xây	Worker	Labor	41	UnderHi	làm ruộng	Farmer	Labor	39	UnderHi	med	no	NA	1	b	1	1	1	0	a	NA	a	1	buy	d	c	cẩm nang chống bắt nạt danh nhân việt nam	yes	a	a	1	truyện kể về cách trưởng thành không gia đình sách hướng dẫn nấu ăn
3877	16.179	43074	16	7	Male	7	0	0	0	1	2	1	f	NA	NA	công chức	Public servant	Intellectuals	39	PostGrad	nấu ăn	Chef	Labor	38	Uni	med	no	NA	1	b	1	2	1	0	c	NA	a	1	borrow	a	a	tập làm nhà phát minh - kĩ thuật thuở ban sơ những tấm lòng cao cả	yes	a	a	1	NA
3921	16.184	43074	16	7	Male	7	0	0	0	3	3	1	b	bác sĩ	Doctor	làm ruộng	Farmer	Labor	60	UnderHi	làm ruộng	Farmer	Labor	50	UnderHi	med	no	NA	1	f	1	1	2	0	a	NA	a	1	borrow	b	a	những chuyện hay dành cho thiếu nhi mắt biếc	yes	a	a	1	những bài văn hay lớp 7
3925	16.188	43074	16	7	Male	7	0	0	0	4	4	1	d	giáo viên	Teacher	làm ruộng	Farmer	Labor	55	Uni	chụp ảnh	Photographer	Labor	50	Uni	med	yes	2000000	0	e	1	1	1	1	d	NA	a	1	borrow	a	b	dế mèn phiêu lưu kí những tấm lòng cao cả	yes	d	a	1	harry poter hạt giống tâm hồn kính vạn hoa
4015	10.118	43074	5	6	Male	7	0	0	0	3	3	1	NA	bác sĩ	Doctor	thợ xây	Worker	Labor	47	Hi	công nhân	Worker	Labor	37	Hi	med	yes	NA	1	b	1	1	NA	1	e	NA	a	1	borrow	a	b	cậu bé thông minh thạch sanh	yes	c	a	1	có tinh thần tự lập có trái tim yêu thương có chí tiến thủ
4033	15.216	43071	15	8	Female	7	0	0	0	1	2	1	d	Bác sĩ	Doctor	Nông dân	Farmer	Labor	39	UnderHi	Giáo viên	Teacher	Intellectuals	35	Uni	med	no	NA	1	a	0	2	2	NA	a	NA	a	1	borrow	d	b	Túp lều bác Tôm, truyện Kiều	yes	b	a	1	Truyện ngắn Nguyễn Công Hoan, Từ điển hán việt, truyện Kiều
4041	15.219	43071	15	8	Female	7	0	0	0	1	3	1	e	Công nhân	Worker	Nông dân	Farmer	Labor	41	UnderHi	Nông dân	Farmer	Labor	39	UnderHi	med	no	NA	0	a	0	2	2	0	a	NA	a	1	borrow	a	b	truyện Kiều, truyện ngắn Nam Cao	yes	b	a	1	Truyện Kiều, Truyện cổ tích VN, Truyện cổ tích màu hồng
4043	15.22	43071	15	8	Male	7	0	0	0	1	1	1	f	Bác sĩ	Doctor	Nông dân	Farmer	Labor	37	UnderHi	Nông dân	Farmer	Labor	35	UnderHi	med	no	NA	1	a	0	2	1	0	a	NA	a	1	borrow	a	b	Truyện Kiều, Tý Quậy	no	NA	a	1	Truyện cổ tích, truyện đất phương nam
4044	15.221	43071	15	8	Male	7	0	0	0	2	2	1	f	Công nhân	Worker	Nông dân	Farmer	Labor	37	UnderHi	Nông dân	Farmer	Labor	35	Hi	med	no	NA	NA	a	0	2	2	0	c	NA	a	1	borrow	d	b	NA	no	b	a	1	Truyện Kiều, truyện cổ tích Việt Nam
4051	10.146	43075	5	7	Male	7	0	0	0	2	3	1	b	bảo vệ	Guard	nông dân	Farmer	Labor	35	UnderHi	nông dân	Farmer	Labor	NA	UnderHi	rich	no	NA	0	b	1	1	1	0	a	NA	a	1	borrow	a	a	cánh buồm đỏ thắm cho đi là còn mãi mãi	yes	d	a	1	ô long viện thần đồng bí ẩn cơ thể
4054	10.149	43075	5	7	Male	7	0	0	0	3	0	1	NA	công an	Police officer	nông dân	Farmer	Labor	42	UnderHi	nông dân	Farmer	Labor	40	UnderHi	med	no	NA	1	b	1	1	1	0	a	NA	a	1	borrow	a	a	1 triệu câu hỏi vì sao cho đi là còn mãi mãi	yes	d	a	1	công chúa ngủ trong rừng 500 câu chuyện đạo đức gia đình chiếc hộp kì diệu
4073	15.223	43071	15	8	Male	7	0	0	0	3	3	0	d	Nông nghiệp	Farmer	Nông dân	Farmer	Labor	50	UnderHi	Nông dân	Farmer	Labor	46	UnderHi	med	no	NA	1	b	1	2	2	0	a	NA	a	1	borrow	a	b	Danh tướng Lý Thường Kiệt, Dấy nghiệp Trùng Hưng thống nhất non sông	yes	b	a	1	Tý Quậy, đảo hải tặc, Shin cậu bé bút chì
4075	15.225	43071	15	8	Male	7	0	0	0	2	2	1	f	Cơ khí	Engineer	Nông dân	Farmer	Labor	38	UnderHi	Nông dân	Farmer	Labor	35	UnderHi	med	no	NA	1	b	1	2	1	0	c	NA	a	1	borrow	d	d	Doraemon, Shin cậu bé bút chì	no	a	a	1	Chí Phèo, Tấm Cám, Tắt đèn
4090	10.168	43075	5	7	Female	7	0	0	0	1	3	NA	d	giáo viên	Teacher	công nhân	Worker	Labor	39	Hi	công nhân	Worker	Labor	33	UnderHi	rich	no	NA	1	c	1	1	1	1	a	NA	a	1	buy	d	b	nối dài vòng tay yêu thương tấm cám	yes	a	a	1	tấm cám tình mẫu tử
4122	10.2	43075	5	7	Female	7	0	0	0	4	4	1	d	ca sĩ	Singer	nông dân	Farmer	Labor	47	Hi	công nhân	Worker	Labor	44	UnderHi	med	no	NA	1	b	1	1	1	1	NA	NA	a	1	buy	d	a	cho tôi xin 1 vế đi tuổi thơ con nghĩ đi mẹ không biết	yes	a	a	1	búp sen xanh con mèo dạy hải âu bay những truyện hay viết cho thiếu nhi
4124	15.228	43071	15	8	Female	7	0	0	0	1	2	1	b	Bác sĩ	Doctor	Nông dân	Farmer	Labor	38	UnderHi	NA	NA	NA	NA	NA	med	no	NA	1	a	0	2	NA	0	a	NA	a	1	borrow	a	a	Hoàng tử bét, truyện ngắn của Nam Cao	no	NA	a	1	Truyện thiêu nhi, Truyện Kiều, Tắt đèn
4125	15.229	43071	15	8	Male	7	0	0	0	2	2	1	f	Game thủ	Gamer	Nông dân	Farmer	Labor	39	Hi	Nông dân	Farmer	Labor	38	Hi	rich	no	NA	1	b	1	3	3	1	c	NA	a	1	buy	b	a	Đảo hải tặc	yes	b	a	1	Tắt đèn, Tấm Cám, Truyện động vật
4137	15.241	43071	15	8	Female	7	0	0	0	2	2	0	f	Họa sĩ	Painter	Nông dân	Farmer	Labor	42	UnderHi	Nông dân	Farmer	Labor	36	UnderHi	NA	NA	NA	0	a	0	2	2	0	a	NA	a	1	borrow	a	a	Truyện cổ tích Việt Nam, Lịch sử Việt Nam	yes	a	a	1	Tắt đèn, Doraemon, Shin cậu bé bút chì
4143	3.215	43071	6	7	Female	7	0	0	0	2	3	1	e	Nhà Khoa học	Scientist	Nông dân	Farmer	Labor	37	UnderHi	Nông dân	Farmer	Labor	35	UnderHi	med	NA	NA	1	a	0	2	2	0	c	NA	a	1	borrow	a	a	Những câu chuyện về thế giới động vật Những câu chuyện lịch sử	yes	a	a	1	Khám phá thế giới Thầy giáo của tôi Khám phá khoa học tự nhiên
4153	3.225	43071	6	7	Female	7	0	0	0	2	2	1	d	Ca sĩ	Singer	Nông dân	Farmer	Labor	43	UnderHi	Giáo viên	Teacher	Intellectuals	40	Uni	med	no	NA	1	e	1	2	1	0	a	NA	a	1	borrow	a	c	Tình cha Doraemon	yes	d	a	1	NA
4163	3.235	43071	6	6	Male	7	0	0	0	1	2	1	a	Giáo viên	Teacher	Nông dân	Farmer	Labor	42	UnderHi	Giáo viên	Teacher	Intellectuals	38	Uni	med	no	NA	1	b	1	2	1	1	f	Truyện tranh	a	1	buy	d	c	Luffy Doraemon	yes	d	a	1	Thế giới động vật Những bài văn hay 150 bài toán hay
4167	3.239	43071	6	6	Female	7	0	0	0	2	3	1	a	Bác sĩ	Doctor	Nông dân	Farmer	Labor	35	Hi	Nông dân	Farmer	Labor	33	UnderHi	med	no	NA	1	a	0	2	2	1	a	NA	a	1	buy	d	b	250 bài văn hay Từ điển Anh Việt	yes	d	a	1	Sáng tác của các nhà khoa học cổ đại Kĩ năng cho trẻ 150 bài toán hay
4168	3.24	43071	6	6	Female	7	0	0	0	4	4	1	b	Bác sĩ	Doctor	Nông dân	Farmer	Labor	47	Hi	Công nhân	Worker	Labor	44	Hi	med	no	NA	NA	a	0	2	3	1	a	NA	a	1	borrow	b	a	Văn học tuổi trẻ Kiến thức văn học	yes	d	a	1	Kĩ năng đá cầu Kĩ năng sống khỏe
4181	3.253	43071	6	6	Female	7	0	0	0	2	3	1	d	Bác sĩ	Doctor	Thợ xây	Worker	Labor	43	UnderHi	Công nhân	Worker	Labor	41	UnderHi	rich	no	NA	1	b	1	2	1	1	a	NA	a	1	NA	a	a	Văn học Lịch sử	yes	d	a	1	Kĩ năng sinh tồn Hướng dẫn làm văn hay Không gia đình
4184	3.256	43071	6	6	Female	7	0	0	0	2	2	1	d	Bác sĩ	Doctor	Thợ xây	Worker	Labor	45	UnderHi	Nông dân	Farmer	Labor	40	UnderHi	med	no	NA	1	b	1	2	2	0	f	Truyện tranh	a	1	buy	d	a	Doraemon Kĩ năng dành cho học sinh lớp 6	yes	b	a	1	Dế Mèn Doraemon Thần đồng đất Việt
4190	3.262	43071	6	6	Male	7	0	0	0	1	2	1	a	Công an	Police officer	Thợ xây	Worker	Labor	38	UnderHi	Nông dân	Farmer	Labor	32	UnderHi	rich	no	NA	NA	b	1	3	2	0	a	NA	a	1	borrow	a	b	Doraemon Conan	yes	c	a	1	Thế giới tự nhiên Khoa học Nghiên cứu về động vật trên thế giới
4216	10.219	43074	5	7	Female	7	0	0	0	1	3	NA	b	giáo viên	Teacher	nông dân	Farmer	Labor	35	UnderHi	nông dân	Farmer	Labor	34	UnderHi	poor	NA	NA	1	b	1	1	2	0	a	NA	a	1	borrow	d	c	1 nghìn lẻ một đêm lịch sử việt nam	yes	a	a	1	người mẹ câm sung 1 cuộc đi săn An Dương Vương
4244	10.247		5	7	Male	7	0	0	0	1	3	1	e	khám phá lịch sử	Scientist	nông dân	Farmer	Labor	36	Hi	nông dân	Farmer	Labor	34	Hi	med	no	NA	1	b	1	2	2	1	a	NA	a	1	buy	a	a	bạn có là học sinh cá tính phạm hổ	yes	a	a	1	doraemon conan inluysa
4258	10.261		5	7	Female	7	0	0	0	3	3	1	c	hướng dẫn viên	Tour guide	nông dân	Farmer	Labor	50	Hi	nông dân	Farmer	Labor	47	Hi	med	no	1000000	1	b	1	1	1	1	d	NA	a	1	buy	d	b	kĩ năng sống quà tặng tặng quà	NA	a	a	1	tấm cám mẹ tôi túp lều của bác tom
4352	10.316	43074	5	8	Female	7	0	0	0	1	3	1	e	họa sĩ	Painter	nông dân	Farmer	Labor	39	NA	nông dân	Farmer	Labor	39	NA	NA	NA	NA	1	a	0	2	NA	NA	e	NA	a	1	borrow	d	b	danh thần đất việt kĩ năng sống của học sinh	yes	a	a	1	NA
4361	10.325	43074	5	8	Male	7	0	0	0	4	4	1	e	bác sĩ	Doctor	nông dân	Farmer	Labor	50	NA	nông dân	Farmer	Labor	47	NA	med	NA	NA	1	b	1	1	1	NA	a	NA	a	1	buy	d	a	kĩ năng tư duy và sáng tạo phòng chống thiên tai dịch bệnh	yes	c	a	1	bồi dưỡng văn học tình yêu của mẹ hạt giống tâm hồn
4385	10.35	43074	5	8	Female	7	0	0	0	0	2	1	d	giáo viên	Teacher	nông dân	Farmer	Labor	35	UnderHi	công nhân	Worker	Labor	NA	Hi	med	no	NA	1	NA	1	2	2	1	d	NA	a	1	borrow	a	a	vượt lên số phận khát vọng sống	yes	a	a	1	NA
4392	10.357	43074	2	8	Female	7	0	0	0	4	4	1	d	công an	Police officer	nông dân	Farmer	Labor	49	UnderHi	nông dân	Farmer	Labor	47	UnderHi	med	no	NA	1	b	1	2	2	0	d	NA	a	1	borrow	b	b	vượt lên số phận 3 ngày ở vương quốc tí hon	yes	d	a	1	NA
4426	15.28	43071	15	9	Female	7	0	0	0	4	4	1	b	Điều dưỡng	Nurse	Nông dân	Farmer	Labor	50	UnderHi	Nông dân	Farmer	Labor	40	UnderHi	med	no	NA	1	a	0	2	2	0	a	NA	a	1	borrow	b	b	Việc làng, bài học vô giá về những điều bình dị	yes	a	a	1	Câu chuyện từ trái tim, đời thừa, cô bé bên cửa sổ
4488	10.4	43074	5	9	Male	7	0	0	0	2	2	1	b	bộ đội	Soldier	bộ đội	Soldier	Labor	46	Hi	giáo viên	Teacher	Intellectuals	43	Uni	med	yes	NA	0	a	0	2	1	0	e	NA	a	1	borrow	b	d	hạt giống tâm hồn nhân ái bao dung	yes	a	a	1	chí phèo vợ nhặt người ngựa ngựa người
4529	10.438	43074	5	9	Female	7	0	0	0	2	3	1	d	công an	Police officer	nông dân	Farmer	Labor	43	UnderHi	công nhân	Worker	Labor	40	UnderHi	med	no	NA	1	c	1	2	1	0	b	NA	a	1	borrow	b	a	búp sen xanh bồ câu không đưa thư	yes	d	a	1	khám phá thế giới doraemon conan
4564	10.45	43074	5	9	Female	7	0	0	0	3	3	1	b	kinh doanh	Businessman	nông dân	Farmer	Labor	42	UnderHi	nông dân	Farmer	Labor	39	UnderHi	NA	no	NA	1	f	1	2	1	NA	a	NA	a	1	borrow	a	d	doraemon shin	yes	b	a	1	truyện kiều truyện văn học bong bóng lên trời
4571	16.213	43074	16	7	Female	7	0	0	0	2	4	1	c	tu sĩ	Monk	làm ruộng	Farmer	Labor	40	Hi	làm ruộng	Farmer	Labor	38	NA	med	no	NA	1	f	1	1	1	1	a	NA	a	1	borrow	a	d	shin cậu bé bút chì doraemon	yes	b	a	1	shin cậu bé bút chì doraemon conan
4578	10.453	43074	5	9	Female	7	0	0	0	4	6	1	b	bác sĩ	Doctor	nông dân	Farmer	Labor	46	UnderHi	nông dân	Farmer	Labor	44	UnderHi	med	no	NA	0	f	1	2	1	0	a	NA	a	1	borrow	a	a	bồ câu không đưa thư shin	yes	a	a	1	cô gái đến từ hôm qua còn chút gì để nhớ bong bóng lên trời
4599	15.342	43071	15	9	Male	7	0	0	0	2	3	1	a	NA	NA	Làm mộc	Worker	Labor	45	UnderHi	Nông dân	Farmer	Labor	40	UnderHi	med	no	NA	1	e	1	2	2	1	f	toán học	a	1	borrow	d	d	Đắc nhân tâm, Cấp tốc tiếng anh	yes	b	a	1	NA
4625	15.356	43071	15	9	Female	7	0	0	0	2	3	1	f	Bộ đội	Soldier	Nông dân	Farmer	Labor	53	UnderHi	Bán hàng	Seller	Labor	41	Hi	med	no	NA	1	b	1	1	1	0	e	NA	a	1	borrow	b	d	Truyện Kiều, Vầng trăng quầng lửa	yes	d	a	1	hãy đặt trách nhiệm lên vai, quà tặng cuộc sống, tý quậy
4721	10.499		5	9	Female	7	0	0	0	2	3	1	b	đầu bếp	Chef	thợ mộc	Worker	Labor	43	Hi	nông dân	Farmer	Labor	42	Hi	poor	no	NA	1	c	1	2	2	0	e	NA	a	1	buy	a	b	sách hướng dẫn nấu ăn sách van học	yes	a	a	1	chiên stranh và hòa bình đắc nhân tâm
4744	10.52		5	9	Female	7	0	0	0	2	4	1	e	thợ may	Worker	nông dân	Farmer	Labor	48	NA	nông dân	Farmer	Labor	42	UnderHi	poor	NA	5000000	1	c	1	2	2	1	a	NA	a	1	buy	d	c	kĩ năng sống của học sinh danh thần đất việt	yes	b	a	1	sông đông êm đềm
4750	524		5	9	Male	7	0	0	0	1	3	1	f	phi công	Pilot	nông dân	Farmer	Labor	37	Hi	công nhân	Worker	Labor	36	UnderHi	poor	NA	3000000	1	a	0	2	2	1	a	NA	a	1	buy	d	d	tuổi thơ dữ dội việt làng	yes	d	a	1	chiến tranh và hòa bình đắc nhân tâm
4759	10.532		5	9	Male	7	0	0	0	5	6	1	f	lái máy xúc	Driver	nông dân	Farmer	Labor	55	NA	nông dân	Farmer	Labor	55	NA	poor	yes	3000000	1	b	1	2	NA	1	e	NA	a	1	borrow	d	c	lịch sử việt nam bằng tranh dế mèn phưu lưu kí	yes	d	a	1	sông đông êm đềm mùa hoa thuốc phiện cuối cùng conan
4765	16.632	43074	16	9	Female	7	0	0	0	2	4	1	e	danh nhân	Businessman	nông dân	Farmer	Labor	NA	UnderHi	nông dân	Farmer	Labor	NA	UnderHi	med	no	NA	1	b	1	2	NA	1	b	NA	a	1	buy	d	a	đắc nhân tâm truyện kiều	yes	b	a	1	đời thay đổi khi chúng ta thay đổi cho tôi xin một vé về tuổi thơ tôi tài giỏi bạn cũng thế
4768	16.635	43074	16	9	Female	7	0	0	0	1	0	1	e	dẫn chương trình	Reporter	nông dân	Farmer	Labor	53	Hi	nông dân	Farmer	Labor	50	UnderHi	med	no	NA	1	b	1	1	1	0	f	truyện tranh	a	1	buy	a	b	thám tử lừng danh conan cuộc sống của tôi	yes	a	a	1	conan thám tử lừng danh tập cuối shin cậu bé bút chì cách sống
4875	10.85	43075	5	6	Female	7	0	0	0	2	3	1	b	đầu bếp	Chef	thợ xây	Worker	Labor	35	Hi	công nhân	Worker	Labor	32	Hi	rich	no	NA	1	b	1	2	1	0	d	NA	a	1	borrow	d	c	doremon cổ tích 12 nàng công chúa	yes	d	a	1	doremon shin cậu bé bút chì đại dương khó thương
731	11.103	43071	11	7	Male	6.9	0	0	0	2	3	1	a	Cầu thủ	Footballer	Làm sơn	Worker	Labor	43	UnderHi	Làm ruộng	Farmer	Labor	37	UnderHi	med	no	NA	0	e	1	2	2	1	e	NA	a	1	borrow	b	b	Sách dạy đá bóng Sách dạy bóng chuyền	yes	a	a	1	Sách bóng đá Sách bóng chuyền Sách dạy đánh vợt
877	11.71	43071	11	7	Male	6.9	0	0	0	2	3	1	e	Thợ xây	Worker	Nông dân	Farmer	Labor	45	UnderHi	Công nhân	Worker	Labor	39	Hi	rich	no	NA	1	b	1	1	1	1	a	NA	a	1	buy	a	a	Hạt giống tâm hồn Tắt đèn	yes	b	a	1	Dế mèn phiêu lưu ký 350 câu chuyện gia đình Cây khế
888	11.82	43071	11	7	Male	6.9	0	0	0	1	2	1	d	Bác sĩ	Doctor	Nông dân	Farmer	Labor	41	Uni	Giáo viên	Teacher	Intellectuals	38	Uni	rich	yes	NA	1	b	1	1	1	0	b	NA	a	1	buy	a	a	Các danh nhân thế giới Doraemon	yes	a	a	1	Hạt giống tâm hồn Cây khế Tắt đèn
917	11.152	43071	11	8	Female	6.9	0	0	0	2	3	1	f	Thiết kế	Designer	Nông dân	Farmer	Labor	45	UnderHi	Nông dân	Farmer	Labor	39	UnderHi	med	no	NA	1	b	1	2	1	0	a	NA	a	1	borrow	d	c	Nữ hiệp quái chiêu Hạt giống tâm hồn	yes	d	a	1	Thám tử lừng danh Conan Doraemon Cây tre trăm đốt
1219	1.23	43077	1	6	Female	6.9	0	0	0	2	2	1	a	Không xác định	NA	Thợ xây	Worker	Labor	42	UnderHi	Không xác định	NA	Labor	NA	NA	med	no	NA	1	a	0	1	1	0	c	NA	a	1	borrow	a	d	Bí mật học đường Hạt giống tâm hồn	yes	d	a	1	Cây khế Doraemon Không gia đình
1222	1.26	43077	1	6	Male	6.9	0	0	0	1	2	1	d	Quân nhân	Soldier	Thợ xây	Worker	Labor	47	UnderHi	Không xác định	NA	Labor	34	UnderHi	med	no	NA	1	b	1	1	1	0	c	NA	a	1	borrow	b	d	Đất rừng phương Nam 7 viên ngọc rồng	yes	b	a	1	Không gia đình Thám tử lừng danh Conan 7 viên ngọc rồng
2241	8.248	43076	8	9	Male	6.9	0	0	0	4	4	1	e	Cầu thủ bóng đá	Footballer	NA	NA	NA	NA	NA	Nông dân	Farmer	Labor	51	UnderHi	poor	no	NA	1	c	1	1	3	1	e	NA	a	1	borrow	a	d	Tôi tài giỏi bạn cũng thế Lão Hạc	yes	a	a	1	Chí Phèo Tắt đèn Tấm Cám
2524	16.48	43074	16	6	Female	6.9	0	0	0	2	3	1	a	họa sĩ	Painter	làm ruộng	Farmer	Labor	37	Hi	làm ruộng	Farmer	Labor	35	Hi	NA	no	NA	1	a	0	1	1	0	a	NA	a	1	borrow	a	a	shin cậu bé bút chì doraemon	yes	a	a	1	shin doraemon
2769	8.103	43076	8	7	Female	6.9	0	0	0	2	2	1	c	NA	NA	Tự do	Freelancer	Labor	43	Uni	Tự do	Freelancer	Labor	40	Uni	rich	no	NA	1	a	0	3	2	1	b	NA	a	1	borrow	NA	a	Hạt giống tâm hồn Học để làm gì	yes	d	a	1	NA
2916	16.363	43075	16	8	Female	6.9	0	0	0	2	3	1	e	Bác sĩ	Doctor	Nông dân	Farmer	Labor	45	Hi	Nông dân	Farmer	Labor	42	UnderHi	med	no	NA	1	e	1	1	NA	1	d	NA	a	1	borrow	a	a	Lịch sử nghệ thuật	yes	d	a	1	Tin học/ Kỹ thuật Truyện văn học Danh nhân
3261	3.37	43071	6	9	Male	6.9	0	0	0	1	3	1	b	Kĩ sư	Engineer	Nông dân	Farmer	Labor	39	UnderHi	Nông dân	Farmer	Labor	37	UnderHi	poor	no	NA	0	b	1	2	1	0	e	NA	a	1	borrow	a	d	Những danh thần đất Việt Bụi phấn	yes	a	a	1	Hướng dẫn chọn nghề Thúy Kiều
3334	3.58	43071	6	9	Male	6.9	0	0	0	2	2	1	e	Công an	Police officer	Nông dân	Farmer	Labor	56	Hi	Nông dân	Farmer	Labor	47	Hi	med	no	NA	1	b	1	2	2	0	d	NA	a	1	buy	d	a	phép lịch sự Tai nạn về thực phẩm	yes	d	a	1	Phòng chống thiên tai và dịch bệnh Rèn luyện trí thông minh Số đỏ
3386	16.76	43074	16	6	Female	6.9	0	0	0	2	3	1	d	giáo viên	Teacher	xây dựng	Worker	Labor	39	Hi	làm ruộng	Farmer	Labor	36	Hi	med	no	NA	1	c	1	3	2	0	a	NA	a	1	borrow	a	a	tự nhiên vũ trụ túp lều của bác tôm	yes	d	a	1	con hổ có nghĩa giới tính nam/nữ
3401	16.89	43074	16	6	Female	6.9	0	0	0	1	3	1	b	bác sĩ	Doctor	xây dựng	Worker	Labor	35	Hi	làm ruộng	Farmer	Labor	35	Hi	med	no	NA	1	e	1	1	2	0	a	NA	a	1	buy	b	a	bồ câu không đưa thư cho và nhận	yes	d	a	1	chú mèo máy đến từ tương lai
3500	3.102	43071	6	8	Female	6.9	0	0	0	2	2	1	b	Họa sĩ	Painter	Nông dân	Farmer	Labor	41	Hi	Nông dân	Farmer	Labor	38	UnderHi	med	no	NA	1	b	1	1	1	0	c	NA	a	1	borrow	d	b	Máy móc dưới nước Nam Cao	yes	a	a	1	10 vạn câu hỏi vì sao Cô bé bán diêm Truyện cười
3501	3.103	43071	6	8	Female	6.9	0	0	0	1	3	1	d	Hướng dẫn viên du lịch	Tour guide	Thợ xây	Worker	Labor	42	UnderHi	Công nhân	Worker	Labor	34	Hi	poor	no	NA	NA	b	1	2	2	0	a	NA	a	1	borrow	d	a	Công nghệ sinh học Hy vọng từ những điều thông minh	yes	d	a	1	Cậu bé bút chì Doraemon Khám phá tự nhiên thiên nhiên
3847	16.149	43074	16	6	Male	6.9	0	0	0	3	3	1	d	bộ đội	Soldier	làm ruộng	Farmer	Labor	43	UnderHi	làm ruộng	Farmer	Labor	42	Hi	med	no	NA	1	e	1	3	2	0	c	NA	a	1	gift	b	a	thạch sanh sơn tinh, thủy tinh	yes	c	a	1	conan doremon truyện cười
3862	16.164	43074	16	7	Male	6.9	0	0	0	1	2	1	c	nhà báo	Journalist	làm ruộng	Farmer	Labor	43	UnderHi	làm ruộng	Farmer	Labor	33	UnderHi	med	yes	NA	1	c	1	2	2	0	b	NA	a	1	borrow	a	b	doraemon 7 viên ngọc rồng	yes	b	a	1	7 viên ngọc rồng siêu cấp one piece đảo hải tặc đấu sĩ lbx
730	11.102	43071	11	7	Male	6.8	0	0	0	1	2	1	a	Cầu thủ, ca sĩ	Footballer	Xây dựng	Worker	Labor	40	UnderHi	Làm ruộng	Farmer	Labor	37	UnderHi	poor	no	NA	1	b	1	1	1	0	a	NA	a	1	borrow	a	c	Ô nhiễm môi trường Conan	yes	d	a	1	Lịch sử thế giới Conan Học tốt
770	11.56	43071	11	6	Female	6.8	0	0	0	1	1	1	c	Bác sĩ	Doctor	Làm ruộng	Farmer	Labor	36	UnderHi	Công nhân	Worker	Labor	32	UnderHi	rich	yes	4500000	1	b	1	2	2	0	c	NA	a	1	buy	b	d	Doraemon Nàng bạch tuyết và 7 chú lùn	yes	d	a	1	Những tấm lòng cao cả Cô bé quàng khăn đỏ Tấm Cám
892	11.86	43071	11	7	Male	6.8	0	0	0	3	3	1	d	Công nhân	Worker	Nông dân	Farmer	Labor	46	UnderHi	Nông dân	Farmer	Labor	45	UnderHi	med	no	NA	1	b	1	1	1	0	d	NA	a	1	buy	d	a	Doraemon Siêu bá thế kỉ	yes	c	a	1	Nữ thần báo tử Học sinh chân kinh Công chúa mặt trăng
1004	14.77	43071	14	7	Male	6.8	0	0	0	1	1	1	d	Công nhân	Worker	Tự do	Freelancer	Labor	48	UnderHi	Tự do	Freelancer	Labor	42	UnderHi	med	no	NA	1	b	1	1	1	0	d	NA	a	1	buy	a	a	Thiên tài Vượt lên số phận	yes	a	a	1	Thám tử lừng danh Conan Doraemon Khoa học thế giới
1221	1.25	43077	1	6	Male	6.8	0	0	0	2	4	1	f	Công an	Police officer	Không xác định	NA	NA	47	UnderHi	Không xác định	NA	Labor	34	UnderHi	poor	no	NA	1	b	1	2	1	0	c	NA	a	1	borrow	a	a	Khoa học tư duy Sách dạy chế tạo	yes	a	a	1	7 viên ngọc rồng Ô Long viện Doraemon
1236	1.97	43077	1	8	Male	6.8	0	0	0	3	3	1	d	Bác sĩ	Doctor	Thợ mộc	Worker	Labor	47	UnderHi	Thợ mộc	Worker	Labor	45	UnderHi	med	no	NA	1	b	1	2	2	0	d	NA	a	1	buy	a	c	Những gì bạn chưa biết Công nghệ sinh học	yes	a	a	1	Dế Mèn phiêu lưu kí Bách khoa toàn thư Khúc đồng giao lấm láp
1757	9.34	43073	9	9	Male	6.8	0	0	0	1	2	1	a	công nhân ( điện, nước)	Worker	làm ruộng	Farmer	Labor	36	UnderHi	Công nhân	Worker	Labor	32	UnderHi	med	no	NA	1	f	1	2	1	0	b	NA	a	1	borrow	a	d	Tuổi trẻ đáng giá bao nhiêu Nghệ thuật hợp tác thầy trò	yes	a	a	1	học trong sử sách Nghệ thuật hợp tác thày trò tuổi trẻ đáng giá bao nhiêu
1859	2.265	43076	4	8	Male	6.8	0	0	0	2	2	1	f	Công nghệ thông tin	Engineer	Nông dân	Farmer	Labor	47	UnderHi	Nông dân	Farmer	Labor	44	UnderHi	med	no	NA	1	b	1	2	2	0	b	NA	a	1	borrow	d	b	Doraemon Kĩ năng sống	yes	b	a	1	Conan Cậu bé bút chì Naruto
2520	16.44	43074	16	6	Male	6.8	0	0	0	1	1	1	d	bác sĩ	Doctor	làm ruộng	Farmer	Labor	41	UnderHi	làm ruộng	Farmer	Labor	37	UnderHi	rich	no	NA	1	b	1	2	2	0	c	NA	a	1	borrow	a	a	sự kinh hoàng về thời gian những tấm lòng cao cả	yes	c	a	1	doraemon conan thám tử lừng danh shin cậu bé bút chì
2620	13.81	43073	13	6	Male	6.8	0	0	0	2	2	1	f	Cảnh sát	Police officer	thợ sơn	Worker	Labor	67	PostGrad	tiếp viên hàng không	Flight attendant	Intellectuals	65	Uni	rich	yes	NA	1	a	0	2	1	1	f	truyện tranh	a	1	buy	d	b	conan truyện cổ tích việt nam	yes	b	a	1	Conan hướng dẫn lắp giáp ô tô những đứa trẻ tinh nghịch
2832	16.293	43074	16	7	Female	6.8	0	0	0	4	5	1	b	Thiết kế thời trang	Fashion designer	Nông dân	Farmer	Labor	44	Hi	Nông dân	Farmer	Labor	40	UnderHi	med	no	NA	1	a	0	2	1	1	a	NA	a	1	buy	a	b	Búp sen xanh Truyện cổ tích	yes	b	a	1	Công chúa ngủ trong rừng Shin Doraemon
2850	16.309	43074	16	7	Female	6.8	0	0	0	2	3	1	b	Giáo viên	Teacher	Nông dân	Farmer	Labor	40	UnderHi	Nông dân	Farmer	Labor	37	UnderHi	med	no	NA	1	a	0	2	1	0	a	NA	a	1	borrow	d	NA	Tình cha Tình chị em	yes	b	a	1	Doraemon Sự tích cây nêu ngày tết Ngưu lang chức nữ
2858	16.317	43074	16	7	Male	6.8	0	0	0	2	3	1	b	Cảnh sát	Police officer	Nông dân	Farmer	Labor	39	UnderHi	Nông dân	Farmer	Labor	35	UnderHi	med	no	NA	1	a	0	2	2	NA	a	NA	a	1	buy	c	a	Thánh gióng Điều hay lẽ phải	yes	c	a	1	Thần đồng đất Việt Cẩm nang cuộc sống Quà tặng cuộc sống
2994	8.59	43076	8	6	Male	6.8	0	0	0	1	3	1	a	Nhà Khoa học	Scientist	Tài xế	Driver	Labor	35	Uni	Buôn bán	Seller	Labor	33	Uni	med	NA	NA	1	a	0	2	1	NA	c	NA	a	1	borrow	b	c	Khoa học và kĩ thuật Tiến tới tương lai	yes	a	a	1	Những nhà khoa học nổi tiếng
3114	16.447	43074	16	8	Female	6.8	0	0	0	2	3	1	NA	Nhân viên	Employee	Thợ xây	Worker	Labor	42	UnderHi	Nông dân	Farmer	Labor	36	UnderHi	med	no	NA	1	b	1	1	1	0	f	Truyện tranh	a	1	borrow	d	b	Gilliver và xứ sở tí hon Doraemon	yes	NA	a	1	Doraemon Tiểu thuyết Conan
3267	3.43	43071	6	9	Male	6.8	0	0	0	2	2	1	NA	Kĩ sư xây dựng	Engineer	Thợ xây	Worker	Labor	46	NA	Nông dân	Farmer	Labor	47	NA	med	yes	12000000	1	c	1	2	1	1	a	NA	a	1	buy	a	d	Cổ tích Conan	yes	d	a	1	tHế giới quanh ta Cuộc sống dưới đại dương Cuộc sống Vũ trụ
3268	3.44	43071	6	9	Female	6.8	0	0	0	4	4	1	b	Tạo mẫu tóc	barber	Công Nhân	Worker	Labor	49	UnderHi	Nông dân	Farmer	Labor	50	UnderHi	med	no	NA	1	c	1	2	1	1	a	NA	a	1	buy	a	d	Conan doraemon	yes	a	a	1	Nhật kí của mẹ truyện kiều Nguyễn Nhật Ánh
3363	16.64	43074	16	6	Female	6.8	0	0	0	2	2	1	b	họa sĩ	Painter	làm ruộng	Farmer	Labor	41	UnderHi	làm ruộng	Farmer	Labor	35	UnderHi	med	no	NA	1	a	0	1	1	0	d	NA	a	1	borrow	a	a	truyện ngụ ngôn đông tây chiếc lá thuộc bài	yes	a	a	1	shin cậu bé bút chì doraemon conan thám tử lừng danh
3364	16.65	43074	16	6	Female	6.8	0	0	0	2	2	1	d	họa sĩ	Painter	làm ruộng	Farmer	Labor	40	Uni	làm ruộng	Farmer	Labor	42	NA	med	no	NA	1	a	0	1	2	0	d	NA	a	1	borrow	c	a	hạt giống tâm hồn 1,2,3,4 kĩ năng sống	yes	d	a	1	doraemon tý quậy shin
3680	3.153	43071	6	8	Female	6.8	0	0	0	3	4	1	c	Công an	Police officer	Nông dân	Farmer	Labor	44	UnderHi	Nông dân	Farmer	Labor	44	UnderHi	med	no	NA	1	c	1	2	2	NA	a	NA	a	1	NA	a	a	Hạt giống tâm hồn Thời tiết mạnh như bão tố	NA	a	a	1	Cổ tích Việt Nam Truyện cười Truyện tranh
3857	16.159	43074	16	6	Female	6.8	0	0	0	1	2	1	e	công an	Police officer	thợ xây	Worker	Labor	40	Hi	làm ruộng	Farmer	Labor	35	Hi	med	no	NA	1	c	1	2	1	0	a	NA	a	1	buy	a	d	sách địa lí sách văn học, doraemon	yes	a	a	1	truyện cổ tích truyện conan truyện doraemon
4003	10.106	43074	5	6	Male	6.8	0	0	0	2	3	1	f	bộ đội	Soldier	cơ khí	Engineer	Labor	31	Hi	công nhân	Worker	Labor	32	Hi	med	no	NA	1	b	1	1	1	1	a	NA	a	1	buy	a	a	doraemon conan	yes	b	a	1	tấm cám báo tuổi trẻ tham khảo bài văn hay
4147	3.219	43071	6	7	Female	6.8	0	0	0	1	1	1	e	Điện tử	Engineer	Nông dân	Farmer	Labor	41	Hi	Nông dân	Farmer	Labor	40	Hi	med	no	NA	1	e	1	2	1	1	d	NA	a	1	buy	b	c	Kĩ năng sống Tình chị em	yes	b	a	1	Thiếu nhi Kĩ năng sống Nước ngoài
4518	10.427	43074	5	9	Male	6.8	0	0	0	2	3	1	d	đầu bếp	Chef	tự do	Freelancer	Labor	41	UnderHi	công nhân	Worker	Labor	40	UnderHi	rich	no	NA	1	f	1	2	1	0	e	NA	a	1	borrow	d	a	bồ câu không đưa thư lịch sử việt nam bằng tranh	yes	d	a	1	tắt đèn truyện kiều truyện về các danh nhân văn học
4630	10.466	43074	5	9	Male	6.8	0	0	0	1	3	1	f	nhà khoa học	Scientist	nông dân	Farmer	Labor	50	UnderHi	nông dân	Farmer	Labor	NA	UnderHi	med	no	NA	1	e	1	1	1	1	a	NA	a	1	borrow	d	a	thép đã tôi thế ấy 1 nghệ thuật sống	no	b	a	1	vật lí toán học hãy đặt trách nhiệm lên vai
4635	15.36	43071	15	9	Female	6.8	0	0	0	1	2	1	b	Giáo viên	Teacher	Nông dân	Farmer	Labor	34	UnderHi	Nông dân	Farmer	Labor	35	UnderHi	med	no	NA	1	b	1	1	1	0	e	NA	a	1	borrow	b	d	Truyện Kiều, kỹ năng sống dành cho học sinh	yes	a	a	1	quà tặng cuộc sống, bui phấn
4890	7.361	43071	7	9	Male	6.8	0	0	0	2	2	0	NA	Đầu bếp	Chef	Không xác định	NA	NA	NA	NA	Nông dân	Farmer	Labor	40	Hi	med	no	NA	1	b	1	1	1	0	f	Truyện tranh	a	1	borrow	d	d	Doraemon Thám tử lừng danh Conan	yes	c	a	1	7 viên ngọc rồng Lịch sử Việt Nam Doraemon
3997	16.207	43074	16	7	Female	6.76	0	0	0	1	1	1	b	bác sĩ	Doctor	tự do	Freelancer	Labor	39	UnderHi	làm ruộng	Farmer	Labor	51	UnderHi	poor	no	NA	1	a	0	2	2	0	a	NA	a	1	borrow	a	c	những điều lạ ông già và biển cả	yes	a	a	1	toán nâng cao lớp 7 108 chuyện khoa học vui lý thú 108 truyện đồng thoại khoa học hay nhất
421	4.303	43075	2	9	Female	6.7	0	0	0	2	2	1	b	Công an	Police officer	Làm thợ	Worker	Labor	41	UnderHi	làm thợ	Worker	Labor	38	UnderHi	rich	no	NA	1	b	1	1	1	0	a	NA	a	1	borrow	a	b	Tí Quậy Shin cậu bé bút chì	yes	b	a	1	Nhật ký trong tù Sách kỹ thuật xây dựng
424	4.306	43075	2	9	Female	6.7	0	0	0	2	3	1	b	Công an	Police officer	Làm thợ	Worker	Labor	40	UnderHi	Làm ruộng	Farmer	Labor	38	UnderHi	med	no	NA	0	b	1	1	1	0	a	NA	a	1	buy	a	b	Tí Quậy Shin cậu bé bút chì	no	NA	a	1	Nhật ký trong tù
747	11.119	43071	11	7	Male	6.7	0	0	0	2	3	1	a	Công An	Police officer	Thợ xây	Worker	Labor	39	UnderHi	Làm ruộng	Farmer	Labor	34	UnderHi	med	no	NA	1	b	1	1	1	1	a	NA	a	1	buy	a	c	Truyện tình cha Sâu thẳm lòng con	yes	d	a	1	Mười vạn câu hỏi vì sao Từ điển Anh - Việt Lịch sử thế giới
899	11.93	43071	11	7	Female	6.7	0	0	0	1	2	1	b	Bác sĩ	Doctor	Xây dựng	Worker	Labor	38	Hi	Thủ công	Worker	Labor	37	Hi	med	no	NA	1	e	1	2	2	0	e	NA	a	1	borrow	a	b	Bồ câu đưa thư Lịch sử Việt Nam	yes	a	a	1	10 vạn câu hỏi vì sao Lịch sử thế giới Hướng dẫn chơi cờ vua
976	11.38	43071	11	6	Male	6.7	0	0	0	1	2	1	b	Ca sĩ	Singer	Thợ xây	Worker	Labor	34	UnderHi	Nông dân	Farmer	Labor	31	UnderHi	rich	yes	NA	1	b	1	2	3	0	d	NA	a	1	buy	b	a	Thám tử lừng danh Conan Doraemon	yes	c	a	1	Thám tử lừng danh Conan Doraemon Cậu bé bút chì
1065	14.99	43071	14	8	Male	6.7	0	0	0	1	2	1	f	Kĩ sư	Engineer	Quản lý	Manager	Labor	34	Hi	Công nhân	Worker	Labor	33	UnderHi	med	yes	NA	1	b	1	1	1	0	f	Âm nhạc	a	1	borrow	c	a	Hạt giống tâm hồn Doraemon	yes	d	a	1	Hạt giống tâm hồn Đất phương Nam Quà tặng cuộc sống
1255	1.117	43077	1	8	Male	6.7	0	0	0	1	1	1	b	Đầu bếp	Chef	Thợ xây	Worker	Labor	40	UnderHi	Công nhân	Worker	Labor	38	UnderHi	med	no	NA	1	b	1	1	1	0	e	NA	a	1	borrow	d	a	Thám tử lừng danh Conan Doraemon	yes	b	a	1	7 viên ngọc rồng Cậu bé bút chì Doraemon
2219	8.27	43076	8	8	Female	6.7	0	0	0	1	1	NA	d	Đầu bếp	Chef	Thợ xây	Worker	Labor	NA	Hi	Công nhân	Worker	Labor	NA	Hi	med	no	NA	1	a	0	1	1	NA	e	NA	a	1	borrow	a	a	Vượt lên số phận khát Vọng sống	yes	b	a	1	Kì quan thế giới Sinh học Những điều mà em chưa học
2785	8.119	43076	8	7	Female	6.7	0	0	0	1	2	1	b	Buôn bán	Seller	Lái máy	Driver	Labor	46	UnderHi	Công nhân	Worker	Labor	33	UnderHi	med	yes	10000000	1	f	1	1	1	1	a	NA	a	1	borrow	NA	c	Không gia đình Thiên nhiên hoang dã	yes	b	a	1	Không gia đình Hạt giống tâm hồn Conan
2925	16.374	43075	16	8	Female	6.7	0	0	0	1	3	1	a	Công an	Police officer	Nông dân	Farmer	Labor	39	Hi	Nông dân	Farmer	Labor	36	UnderHi	med	no	5000000	1	a	0	1	1	1	b	NA	a	1	buy	c	a	Sách danh nhân Sách nghệ thuật	yes	d	a	1	Truyện văn học Hướng dẫn nghề Ngoại ngữ
2937	16.389	43074	16	8	Male	6.7	0	0	0	1	2	NA	f	Cảnh sát	Police officer	Công nhân	Worker	Labor	52	Hi	Công nhân	Worker	Labor	43	Hi	med	yes	NA	1	b	1	1	1	0	e	NA	a	1	borrow	d	a	Khám phá rừng Kì quan thế giới	yes	b	a	1	Công nghệ sinh học Pho tượng rồng vàng Hướng dẫn kĩ thuật luyện môn bóng rổ
3000	8.03	43076	8	6	Female	6.7	0	0	0	1	2	NA	f	Đầu bếp	Chef	Công Nhân	Worker	Labor	35	Hi	Công nhân	Worker	Labor	32	UnderHi	med	no	NA	1	c	1	1	1	1	b	NA	a	1	buy	NA	NA	Bí mật học đường Cổ tích	yes	b	a	1	Nanh trắng Cô gái ngón út Nghìn lẻ một đêm
3096	16.429	43074	16	8	Female	6.7	0	0	0	3	3	1	e	Công nhân	Worker	Nông dân	Farmer	Labor	44	UnderHi	Công nhân	Worker	Labor	42	UnderHi	med	no	NA	1	b	1	1	1	0	e	NA	a	1	borrow	a	a	Thần đồng đất Việt Doraemon	yes	a	a	1	Conan Shin Tí quậy
3414	16.97	43074	16	6	Male	6.7	0	0	0	1	2	1	b	phi công	Pilot	xây dựng	Worker	Labor	43	Hi	công nhân	Worker	Labor	35	Hi	med	no	NA	1	b	1	1	1	0	d	NA	a	1	buy	c	c	100 phát minh bí ẩn tự nhiên vũ trụ	yes	d	a	1	truyện khoa học truyện bí ẩn về trái đất truyện khám phá thế giới
3419	16.99	43074	16	6	Female	6.7	0	0	0	2	2	1	b	bác sĩ	Doctor	làm ruộng	Farmer	Labor	38	NA	làm ruộng	Farmer	Labor	36	Hi	med	no	NA	1	b	1	1	1	0	a	NA	a	1	buy	b	a	bí ẩn tự nhiên vũ trụ cho và nhận	yes	c	a	1	truyện văn học
4023	10.126	43074	5	6	Female	6.7	0	0	0	2	3	1	b	làm tóc	Barber	nông dân	Farmer	Labor	48	UnderHi	nông dân	Farmer	Labor	49	UnderHi	med	no	NA	1	a	0	2	2	NA	f	truyện cổ tích	a	1	buy	a	a	truyện thật thà thế giới ô nhiễm	no	a	a	1	những bài văn hay những bài toán khó truyện cổ tích
4185	3.257	43071	6	6	Male	6.7	0	0	0	1	2	1	d	Giáo viên	Teacher	Công Nhân	Worker	Labor	39	Uni	Công nhân	Worker	Labor	32	Uni	rich	no	NA	NA	a	0	3	2	1	c	NA	a	1	buy	d	a	Phổ biến khoa học Thần đồng đất Việt	yes	a	a	1	Hướng dẫn nghề Danh nhân thế giới
4570	16.212	43074	16	7	Female	6.66	0	0	0	4	4	1	e	tiếp viên hàng không	Flight attendant	công nhân	Worker	Labor	46	UnderHi	công nhân	Worker	Labor	45	UnderHi	med	no	NA	1	a	0	2	1	0	a	NA	a	1	borrow	d	d	lá cờ thêu sáu chữ vàng tình cha ấm áp	yes	d	a	1	lịch sử việt nam nguyên hồng các nền văn minh cổ đại
2746	8.137	43076	8	7	Male	6.65	0	0	0	4	4	1	f	NA	NA	Nông dân	Farmer	Labor	47	UnderHi	Nông dân	Farmer	Labor	46	UnderHi	rich	no	NA	1	b	1	1	1	1	d	NA	a	1	buy	a	b	Lịch sử thế giới Thật thà	yes	d	a	1	Tình yêu không bằng lời nói Hoàng tử bé Chú bé rắc rối
779	11.65	43071	11	7	Female	6.6	0	0	0	2	3	1	d	Bác sĩ	Doctor	Làm ruộng	Farmer	Labor	45	Hi	Công dân	Worker	Labor	39	UnderHi	med	no	NA	1	b	1	1	1	0	e	NA	a	1	borrow	a	a	Hạt giống tâm hồn Tình cha	yes	a	a	1	Truyện dân gian Việt Nam 100 câu hỏi vì sao Truyện lịch sử Việt Nam
811	14.32	43071	14	6	Female	6.6	0	0	0	1	3	1	d	Công an	Police officer	Công an	Police officer	Labor	41	PostGrad	Công an	Police officer	Labor	37	PostGrad	med	no	NA	1	b	1	2	3	0	NA	NA	a	1	borrow	d	a	Xao xuyến tuổi học trò Câu lạc bộ thắp sáng ước mơ	yes	d	a	1	Cuộc thi tìm kiếm công chúa Chàng hoàng tử của tôi Hội diễn văn nghệ
838	9.138	43073	9	7	Male	6.6	0	0	0	1	2	1	d	thợ xây	Worker	Làm thợ ( đẽo đá)	Worker	Labor	36	UnderHi	Công nhân	Worker	Labor	34	UnderHi	med	no	NA	1	b	1	2	2	0	e	NA	a	1	borrow	a	b	Giá lạnh đầu mùa Lịch sử Việt nam	yes	d	a	1	Thuyền trưởng đơn vị Cánh buồm đỏ thắm Núi lửa nóng hơn lửa
1202	1.07	43077	1	6	Female	6.6	0	0	0	1	1	1	a	Bác sĩ	Doctor	Tài xế	Driver	Labor	50	UnderHi	Giáo viên	Teacher	Intellectuals	38	Uni	rich	no	NA	1	a	0	2	1	1	c	NA	a	1	buy	b	a	Khoa học lí thú Hành trang cuộc sống	yes	a	a	1	Trại hè lí thú Thám tử lừng danh Conan Danh nhân thế giới
2429	13.135	43073	13	7	Female	6.6	0	0	0	2	2	1	b	Công an	Police officer	Nông dân	Farmer	Labor	55	UnderHi	Nông dân	Farmer	Labor	53	UnderHi	med	no	NA	1	c	1	1	2	0	a	NA	a	1	borrow	a	d	Cổ tích Doraemon	yes	d	a	1	Conan truyện cười dân gian thế giới tự nhiện
2814	16.28	43074	16	7	Female	6.6	0	0	0	2	2	1	c	Giáo viên	Teacher	Nông dân	Farmer	Labor	44	UnderHi	Nông dân	Farmer	Labor	43	UnderHi	med	no	NA	1	e	1	1	1	0	b	NA	a	1	borrow	a	c	Phù thủy xứ Oz Bài học lớn về đạo đức	yes	b	a	1	Doraemon Óc sáng suốt Shin
3004	8.06	43076	8	6	Male	6.6	0	0	0	2	2	1	d	Bộ đội	Soldier	Nông dân	Farmer	Labor	36	UnderHi	Đan thảm	Worker	labor	34	UnderHi	NA	yes	NA	1	b	1	1	1	1	c	NA	a	1	borrow	c	a	Noben Robinson	yes	b	a	1	Noben Robinson Harry Potter
3017	8.12	43076	8	6	Male	6.6	0	0	0	2	2	1	NA	Tiến sĩ	Scientist	Nông dân	Farmer	Labor	40	Hi	Công nhân	Worker	Labor	39	Hi	med	no	NA	1	f	1	3	3	0	b	NA	a	1	buy	b	a	Con Bim trắng tai đen Không gia đình	yes	d	a	1	Truyện Kiều Trạng Quỳnh Hướng dẫn chơi ru bic
3022	8.17	43076	8	6	Male	6.6	0	0	0	3	3	1	f	Tổng Phụ Trách	Manager	Tài xế	Driver	Labor	38	Hi	Buôn bán	Seller	Labor	38	Hi	rich	no	NA	1	b	1	1	2	NA	e	NA	a	1	borrow	d	c	Con bim trắng tai đen Những loài chó của Đức	yes	c	a	1	Không gia đình Sherlock Homles Nghìn lẻ một đêm
3075	16.407	43074	16	8	Female	6.6	0	0	0	2	2	1	d	Thiết kế thời trang	Fashion designer	Nông dân	Farmer	Labor	37	UnderHi	Nông dân	Farmer	Labor	39	UnderHi	med	no	NA	1	a	0	1	2	1	f	truyện vật lý	a	1	borrow	a	a	Truyện dân gian Truyện vật lí	yes	a	a	1	Không gian vũ trụ Bí mật cơ thể con người Máy móc dưới nước
3111	16.444	43074	16	8	Male	6.6	0	0	0	3	3	1	f	Chủ tịch nước	Politician	Nông dân	Farmer	Labor	42	UnderHi	Nông dân	Farmer	Labor	39	Hi	poor	no	NA	1	e	1	2	2	1	f	Truyện tranh	a	1	borrow	a	a	Doraemon Truyện cổ tích	yes	a	a	1	Doraemon Cổ tích Tí quậy
3117	16.45	43074	16	8	Female	6.6	0	0	0	1	2	1	a	Quản lý công ty	Manager	Thợ mộc	Worker	Labor	35	UnderHi	Nông dân	Farmer	Labor	33	UnderHi	NA	no	NA	1	b	1	3	1	1	a	NA	a	1	borrow	d	b	Totochan bên cửa sổ Người chở yêu thương	yes	b	a	1	Conan Truyện kiều Doraemon
3144	16.452	43074	16	8	Male	6.6	0	0	0	1	3	0	NA	Kỹ sư	Engineer	Thợ xây	Worker	Labor	40	Hi	Nông dân	Farmer	Labor	36	Hi	med	no	NA	1	f	1	1	1	0	f	Truyện tranh	a	1	borrow	d	a	Ô long viện Doraemon	no	d	a	1	Ô long viện Doraemon Conan
3222	16.58	43074	16	6	Female	6.6	0	0	0	3	3	1	c	cô giáo	Teacher	làm ruộng	Farmer	Labor	49	UnderHi	làm ruộng	Farmer	Labor	45	UnderHi	med	no	NA	1	b	1	1	2	0	d	NA	a	1	buy	a	b	quà tặng cuộc sống hạt giống tâm hồn	yes	c	a	1	truyện conan truyện doremon học ngoại ngữ
3421	16.1	43074	16	6	Male	6.6	0	0	0	2	2	1	b	công an	Police officer	xây dựng	Worker	Labor	38	Hi	làm ruộng	Farmer	Labor	36	Hi	med	no	NA	1	c	1	1	1	1	a	NA	a	1	borrow	c	a	bồ câu không đưa thư bàn có năm chỗ ngồi	yes	c	a	1	chủ đề về thiên nhiên chủ đề về động vật truyện toán học
3557	15.162	43071	15	7	Male	6.6	0	0	0	1	2	1	e	công an	Police officer	Nông dân	Farmer	Labor	35	Hi	Nông dân	Farmer	Labor	NA	NA	med	no	NA	1	a	0	2	1	0	c	NA	a	1	borrow	b	a	sinh học, thế giới động vật	yes	b	a	1	sách toán học, kỹ năng sống, sách về tâm lý
3805	16.141	43074	16	NA	Male	6.6	0	0	0	1	2	1	e	công an	Police officer	làm ruộng	Farmer	Labor	39	Hi	làm ruộng	Farmer	Labor	30	Hi	med	no	NA	1	a	0	2	2	0	a	NA	a	1	buy	b	c	conan doremon	yes	d	a	1	cổ tích hồ ba bể đảo hải tặc đảo giấu vàng
3846	16.148	43074	16	6	Male	6.6	0	0	0	1	2	1	NA	bác sĩ	Doctor	thợ xây	Worker	Labor	42	UnderHi	làm ruộng	Farmer	Labor	34	Hi	med	no	NA	1	a	0	2	1	1	f	truyện cười	a	1	buy	a	a	truyện 7 viên ngọc rồng truyện doraemon	yes	b	a	1	phát minh công nghệ cao vua trò chơi thám tử lừng danh conan
4012	10.115	43074	5	6	Female	6.6	0	0	0	1	2	1	b	bác sĩ	Doctor	nông dân	Farmer	Labor	33	UnderHi	nông dân	Farmer	Labor	30	UnderHi	med	no	NA	1	c	1	1	1	0	a	NA	a	1	buy	a	b	bài học vô giá thật thà	no	a	a	1	shin tấm cám cây khế
4013	10.116	43074	5	6	Female	6.6	0	0	0	1	2	1	b	công ti	Businessman	thợ xây	Worker	Labor	28	Hi	nông dân	Farmer	Labor	27	Hi	poor	no	3000000	1	c	1	2	1	1	a	NA	a	1	borrow	a	a	tha thứ văn học	yes	c	a	1	khám phá rừng ông gió bà mưa anh chan to ngồi bên cửa sổ
4149	3.221	43071	6	7	Female	6.6	0	0	0	3	3	1	f	Bác sĩ	Doctor	Thợ xây	Worker	Labor	40	NA	Làm giày da	Worker	Labor	39	UnderHi	med	no	NA	1	b	1	1	1	0	c	NA	a	1	borrow	a	c	Doraemon Cậu bé bút chì	yes	b	a	1	Conan Khoa học Các loại chuyện hay thiếu nhi
4496	15.309	43071	15	9	Female	6.6	0	0	0	1	2	1	c	Hướng dẫn viên du lịch	Tour guide	Nông dân	Farmer	Labor	40	UnderHi	Nông dân	Farmer	Labor	39	UnderHi	poor	no	NA	1	b	1	1	1	0	f	truyện tranh	a	1	borrow	a	d	doraemon, hạt giống tâm hồn	yes	b	a	1	Shin, Tâm sự tuổi mới lớn, cút bát tình yêu
4577	16.219	43074	16	7	Male	6.6	0	0	0	1	2	1	b	bác sĩ	Doctor	thợ xây	Worker	Labor	40	UnderHi	làm may	Worker	Labor	37	UnderHi	med	no	NA	0	b	1	2	2	0	a	NA	a	1	buy	a	d	lá cờ thêu sáu chữ vàng vũ khí chiến tranh	yes	d	a	1	đố vui khoa học giải bài tập toán
4650	15.365	43071	15	9	Male	6.6	0	0	0	3	3	1	e	Kinh doanh	Businessman	Nông dân	Farmer	Labor	42	UnderHi	Kinh doanh	Businessman	Labor	40	UnderHi	med	yes	NA	1	b	1	2	1	0	d	NA	a	1	buy	c	d	Shin, doraemon	yes	b	a	1	Chiến tranh và hòa bình, viết về Hồ Xuần Hương, Tác phẩm Tắt đèn
6	6226	43074	3	9	Female	6.5	0	0	0	1	2	1	b	Thợ may	Worker	Làm ruộng	Farmer	Labor	NA	Hi	Làm ruộng	Farmer	Labor	NA	Hi	med	no	NA	1	c	1	2	1	NA	a	NA	a	1	buy	a	a	Truyện Conan Truyện Kiều	NA	b	a	1	Quà tặng cuộc sống Tắt đèn Truyện Kiều
134	4.076	43075	2	9	Male	6.5	0	0	0	1	2	1	f	Kỹ sư	Engineer	làm ruộng	Farmer	Labor	36	UnderHi	làm ruộng	Farmer	Labor	35	Hi	med	no	NA	0	f	1	3	1	0	c	NA	a	1	borrow	a	c	Sách kỹ thuật Sách Văn Học	yes	a	a	1	Truyện cổ tích
155	4.091	43075	2	9	Female	6.5	0	0	0	4	5	1	a	bác sĩ	Doctor	làm ruộng	Farmer	Labor	52	UnderHi	làm ruộng	Farmer	Labor	49	UnderHi	rich	yes	NA	1	b	1	2	2	1	a	NA	a	1	buy	d	a	NA	yes	a	a	1	NA
192	162	43073	3	8	Male	6.5	0	0	0	1	2	1	a	Công an	Police officer	Làm ruộng	Farmer	Labor	42	UnderHi	Làm ruộng	Farmer	Labor	34	Hi	med	no	NA	1	b	1	2	1	0	a	NA	a	1	buy	b	b	Sách hướng dẫn nấu ăn Sách hướng dẫn may mặc	yes	a	a	1	Cô bé bán diêm Tắt đèn Dế Mèn phiêu lưu kí
222	179	43074	3	8	Female	6.5	0	0	0	3	4	1	e	Chưa xác định	NA	Làm ruộng	Farmer	Labor	45	UnderHi	Làm ruộng	Farmer	Labor	44	UnderHi	med	no	NA	1	b	1	2	2	1	b	NA	a	1	borrow	a	a	Cách xử đối và làm việc của Hồ Chí Minh Đạo đức tốt của Hồ Chí Minh	yes	d	a	1	NA
279	6186	43073	3	8	Male	6.5	0	0	0	1	2	1	d	Đầu bếp	Chef	Làm ruộng	Farmer	Labor	37	UnderHi	Làm ruộng	Farmer	Labor	35	UnderHi	rich	no	5000000	1	c	1	2	1	1	a	NA	a	1	buy	b	c	NA	yes	a	a	1	NA
412	4.294	43075	2	8	Male	6.5	0	0	0	1	3	1	f	công nhân	Worker	làm ruộng	Farmer	Labor	40	UnderHi	Công nhân	Worker	Labor	35	Hi	med	no	NA	1	b	1	3	2	0	f	Truyện tranh	a	1	buy	a	c	Shin cậu bé bút chì Đô rê mon	yes	b	a	1	Cô nan Bảy viên ngọc rồng Đảo hải tặc
426	4.308	43075	2	9	Male	6.5	0	0	0	1	3	1	a	Kĩ sư	Engineer	Làm thợ	Worker	Labor	43	UnderHi	Công nhân	Worker	Labor	41	UnderHi	med	yes	6000000	1	c	1	1	1	0	e	NA	a	1	NA	c	a	Hướng dẫn lắp ráp kỹ thuật Bảy viên ngọc rồng	no	NA	a	1	Bạn của nhà nông Dạy nghề
481	9.013	43073	9	6	Female	6.5	0	0	0	2	2	1	a	thợ may	Worker	thất nghiệp	Unemployed	Labor	37	UnderHi	Công nhân	Worker	Labor	36	UnderHi	rich	no	NA	1	d	1	1	1	1	e	NA	a	1	gift	a	a	NA	yes	c	a	1	NA
520	9.055	43073	9	6	Female	6.5	0	0	0	3	3	1	b	nhà văn	Writer	Công nhân	Worker	Labor	50	UnderHi	Công nhân	Worker	Labor	42	UnderHi	med	no	NA	1	b	1	1	1	1	a	NA	a	1	gift	a	d	Cô nan Đô rê mon	yes	b	a	1	Sherlock Homes Cô nan Harry Porter
540	9.086	43073	9	6	Male	6.5	0	0	0	2	2	0	NA	Công an	Police officer	nhân viên	Employee	Labor	38	Hi	Nhân viên	Employee	Labor	35	Hi	med	no	NA	1	d	1	2	1	1	d	NA	a	1	borrow	c	a	Không gian và thời gian Vũ khí triến tranh ( chiến tranh)	yes	d	a	1	Truyện các nhà phát minh vĩ đại Hướng tới tương lai Đô rê mon
541	9.08	43073	9	6	Male	6.5	0	0	0	2	2	1	c	Bác sĩ	Doctor	Làm thợ	Worker	Labor	40	UnderHi	Công nhân	Worker	Labor	41	Hi	med	no	NA	1	a	0	1	1	0	a	NA	a	1	buy	a	a	Shin cậu bé bút chì Đô rê mon	yes	a	a	1	Sáng chế dụng cụ Hướng tới tương lai
544	9.083	43073	9	6	Male	6.5	0	0	0	2	3	1	b	Công an	Police officer	làm ruộng	Farmer	Labor	42	UnderHi	làm ruộng	Farmer	Labor	32	UnderHi	med	no	NA	1	a	0	2	1	0	a	NA	a	1	borrow	d	c	Số đỏ Khủng long, khủng lỉnh	yes	c	a	1	Các nhà phát minh vĩ đại Khủng long cổ đại Khoa học kỳ bí
545	9.077	43073	9	6	Female	6.5	0	0	0	1	2	1	b	Giáo viên	Teacher	Lái xe	Driver	Labor	35	NA	kinh doanh ( bán quần áo)	Businessman	Labor	31	UnderHi	med	no	NA	0	a	0	2	2	0	a	NA	a	1	borrow	a	a	Đô rê mon Những điều em muốn biết	yes	d	a	1	Công chúa Ôti Mèo óc kì Đô rê mon
546	9.073	43073	9	6	Male	6.5	0	0	0	3	3	1	d	Kĩ sư	Engineer	kĩ sư ( đã mất)	Engineer	Labor	NA	NA	Công nhân	Worker	Labor	46	UnderHi	poor	no	NA	1	b	1	1	1	0	d	NA	a	1	borrow	b	c	đô rê mon 7 viên ngọc rồng	yes	a	a	1	naruto sức mạnh vĩ thú Đô rê mon 7 viên ngọc rồng
547	9.065	43073	9	6	Female	6.5	0	0	0	2	3	1	b	Bác sĩ	Doctor	làm ruộng	Farmer	Labor	45	UnderHi	Làm ruộng	Farmer	Labor	40	UnderHi	med	no	NA	1	c	1	2	2	0	a	NA	a	1	borrow	a	a	Cẩm nang bé gái tuổi dậy thì Tình mẫu tử	yes	b	a	1	Công chú ngủ trong rừng Bạch tuyết và 7 chú lùn Đô rê mon
548	9.063	43073	9	6	Male	6.5	0	0	0	1	2	0	NA	Bác sĩ	Doctor	Làm thợ	Worker	Labor	40	Uni	kinh doanh ( ăn uống)	Businessman	Labor	38	Hi	rich	yes	9000000	NA	b	1	2	2	0	e	NA	a	1	gift	a	a	Bạn trai tháo vát Hoàng tử rơm	yes	d	a	1	Thám tử cô nan 7 viên ngọc rồng Đô rê mon
549	9.09	43073	9	6	Male	6.5	0	0	0	3	3	1	e	huấn luyện thể thao	Trainer	làm ruộng	Farmer	Labor	43	Hi	làm ruộng	Farmer	Labor	42	UnderHi	med	no	NA	1	f	1	2	2	0	e	NA	a	1	gift	d	d	Vũ khí chiến chanh ( tranh) Đô rê mon	yes	d	a	1	Co nan Đô rê mon bảy viên ngọc rồng
550	9.067	43073	9	6	Male	6.5	0	0	0	4	4	1	e	Bác sĩ	Doctor	Lái xe ( công nông)	Driver	Labor	51	UnderHi	Công nhân	Worker	Labor	47	UnderHi	med	yes	10000000	1	a	0	1	1	1	a	NA	a	1	buy	a	a	Tình cha Khủng long khủng khỉnh	yes	b	a	1	7 viên ngọc rồng Cô nan Đô rê mon
551	9.064	43073	9	6	Male	6.5	0	0	0	3	3	1	d	Bộ đội	Soldier	kinh doanh	Businessman	Labor	39	UnderHi	làm ruộng	Farmer	Labor	35	UnderHi	med	yes	10000000	1	b	1	2	2	0	c	NA	a	1	borrow	a	b	Hai vạn dặm dưới đáy biển Truyện Ma văn Kháng	yes	b	a	1	Co nan bảy viên ngọc rồng Đô rê mon
552	9.091	43073	9	6	Female	6.5	0	0	0	1	3	1	b	Giáo viên	Teacher	làm ruộng	Farmer	Labor	35	Hi	Công nhân	Worker	Labor	33	UnderHi	med	no	NA	1	a	0	2	1	0	a	NA	a	1	borrow	d	a	số đỏ Đô rê mon	yes	b	a	1	NA
553	9.068	43073	9	6	Male	6.5	0	0	0	2	2	1	d	Bác sĩ	Doctor	Làm ruộng	Farmer	Labor	52	UnderHi	làm ruộng	Farmer	Labor	49	UnderHi	med	no	NA	1	b	1	1	2	0	c	NA	a	1	buy	b	a	Ma Văn Kháng Tình mẫu tử	yes	c	a	1	Bảy viên ngọc rồng Chuyến tàu sinh tử Đô rê mon
554	9.069	43073	9	6	Female	6.5	0	0	0	3	3	1	d	Bác sĩ	Doctor	làm ruộng	Farmer	Labor	45	UnderHi	Làm ruộng	Farmer	Labor	43	UnderHi	poor	no	NA	1	f	1	1	2	1	c	NA	a	1	buy	a	a	Hạt giống tâm hồn Nguồn sống tươi trẻ	yes	b	a	1	Đô rê mon Tình mẹ
556	9.062	43073	9	6	Male	6.5	0	0	0	4	4	0	NA	cầu thủ đá bóng	Footballer	Làm thợ	Worker	Labor	60	Hi	nội trợ	Unemployed	Labor	55	Hi	med	yes	NA	1	e	1	3	1	0	d	NA	a	1	borrow	a	b	Đô rê mon Dragon ball	yes	b	a	1	Câu đố Đo rê mon bảy viên ngọc rồng
559	9.078	43073	9	6	Male	6.5	0	0	0	2	3	1	b	Bác sĩ	Doctor	kinh doanh	Businessman	Labor	42	Hi	kinh doanh	Businessman	Labor	39	UnderHi	med	no	NA	1	b	1	2	1	0	a	NA	a	1	borrow	d	c	Vũ khí chiến tranh Truyện bên ngoài vũ trụ	yes	b	a	1	NA
560	9.079	43073	9	6	Female	6.5	0	0	0	1	0	1	b	nhà báo	Journalist	làm ruộng	Farmer	Labor	35	Hi	làm ruộng	Farmer	Labor	34	UnderHi	med	no	NA	1	a	0	2	2	0	a	NA	a	1	buy	a	a	Đô rê mon Hạt giống tâm hồn	yes	b	a	1	Câu đố Shin cậu bé bút chì
562	9.071	43073	9	6	Male	6.5	0	0	0	1	3	1	b	đầu bếp	Chef	bảo vệ	Guard	Labor	42	UnderHi	Công chức	Public servant	Labor	40	Uni	med	yes	6000000	NA	b	1	2	1	0	f	tìm hiểu thế giới động vật	a	1	buy	d	a	THế giới đó đây 1000 câu hỏi vì sao	yes	b	a	1	Đo rê mon 7 viên ngọc rồng
563	9.076	43073	9	6	Female	6.5	0	0	0	2	4	1	b	Bác sĩ	Doctor	Làm thợ	Worker	Labor	40	Hi	Công nhân	Worker	Labor	38	Hi	med	no	NA	1	a	0	2	1	0	c	NA	a	1	buy	a	a	Cách hoàn thiện bản thân Cẩm nang bé dậy thì	yes	a	a	1	Truyện cổ tích Việt nam Shin cậu bé bút chì Đô Rê mon
565	9.088	43073	9	6	Male	6.5	0	0	0	2	4	1	f	Công an	Police officer	làm ruộng	Farmer	Labor	45	Hi	Công nhân	Worker	Labor	36	UnderHi	med	yes	6000000	1	b	1	1	1	0	d	NA	a	1	borrow	NA	a	Lý Nam Đế Bảy viên Ngọc Rồng	yes	c	a	1	Đô rê mon Bảy viên ngọc Rồng Shin cậu bé bút chì
566	9.087	43073	9	6	Female	6.5	0	0	0	4	5	1	a	Giáo viên	Teacher	Làm thợ	Worker	Labor	45	UnderHi	Làm ruộng	Farmer	Labor	43	UnderHi	med	no	NA	0	c	1	2	2	0	a	NA	a	1	borrow	b	a	NA	yes	b	a	1	NA
567	9.07	43073	9	6	Female	6.5	0	0	0	2	2	1	c	Bác sĩ	Doctor	làm ruộng	Farmer	Labor	39	UnderHi	Làm ruộng	Farmer	Labor	37	UnderHi	med	no	NA	1	b	1	2	2	0	a	NA	a	1	buy	b	c	Để xem ai bạn ai bè Cẩm nang bé gái tuổi dậy thì	yes	d	a	1	Đô rê mon Nàng tiên cá và bảy chú lùn ? Truyện nhớ nhà
570	9.093	43073	9	7	Female	6.5	0	0	0	1	2	1	b	Giáo viên	Teacher	Công nhân	Worker	Labor	36	Hi	Công nhân	Worker	Labor	40	Hi	med	yes	NA	1	b	1	2	3	0	a	NA	a	1	borrow	a	d	Mắt biếc - Nguyễn Nhật Ánh Còn chút gì để nhớ- Nguyễn nhật Ánh	yes	a	a	1	các tác phẩm của Nguyễn Nhật Ánh đó là Nữ sinh Tôi là Beto Tôi thấy hoa vàng trên cỏ xanh
675	9.102	43073	9	7	Male	6.5	0	0	0	2	3	1	e	Bộ đội	Soldier	làm ruộng	Farmer	Labor	40	UnderHi	Công nhân	Worker	Labor	39	UnderHi	med	no	NA	1	b	1	1	1	0	f	Truyện tranh	a	1	borrow	a	a	Việt nam sử lược Hạt giống tâm hồn	yes	b	a	1	Tìm hiểu vũ trụ Tìm hiểu về trái đất Bí mật thế giới động vật
676	9.103	43073	9	7	Female	6.5	0	0	0	1	2	1	b	diễn viên	Actor	làm ruộng	Farmer	Labor	38	UnderHi	Công nhân	Worker	Labor	35	UnderHi	med	yes	7000000	1	b	1	2	2	1	a	NA	a	1	borrow	a	a	Thuyền trưởng Việt nam sử lược	yes	b	a	1	tình cha chân dung bác hồ Cổ tích Việt nam
1017	9.135	43073	9	7	Male	6.5	0	0	0	2	3	1	f	Công an	Police officer	Lái xe	Driver	Labor	38	UnderHi	bán hàng	Seller	Labor	34	Hi	NA	no	NA	1	e	1	1	1	0	a	NA	a	1	buy	d	a	Giá lạnh đầu mùa Quà tặng cuộc sống	yes	d	a	1	Có chút gì để nhớ Sát thát Núi lửa nóng hơn cả lửa
1057	14.91	43071	14	8	Female	6.5	0	0	0	3	3	1	e	Giáo viên	Teacher	Nông dân	Farmer	Labor	49	UnderHi	Nông dân	Farmer	Labor	46	UnderHi	med	no	NA	1	c	1	1	1	0	a	NA	a	1	borrow	d	c	Việc làng Doraemon	yes	a	a	1	Thám tử lừng danh Conan 100 bài văn hay lớp 8 Các bài văn chọn lọc
1063	14.97	43071	14	8	Female	6.5	0	0	0	3	3	1	a	Giáo viên	Teacher	Công nhân	Worker	Labor	52	PostGrad	Công nhân	Worker	Labor	51	Hi	med	no	NA	1	c	1	2	2	1	a	NA	a	1	borrow	a	d	Hạt giống tâm hồn Việc làng	yes	a	a	1	Truyện Kiều Sự ra đời của con người Tiểu thuyết
1261	01.124-1	43077	1	8	Female	6.5	0	0	0	2	3	1	b	Kế toán	Accountant	Thợ xây	Worker	Labor	48	UnderHi	Nông dân	Farmer	Labor	50	UnderHi	med	no	NA	0	b	1	2	2	0	b	NA	a	1	borrow	a	a	Tu dưỡng đạo đức Kĩ năng sống dành cho học sinh	yes	b	a	1	Thám tử lừng danh Conan Doraemon Truyện Trạng Quỳnh
1551	9.161	43073	9	7	Male	6.5	0	0	0	3	3	1	f	Chưa xác định	NA	Làm ruộng	Farmer	Labor	48	Uni	Làm ruộng	Farmer	Labor	48	Hi	med	no	NA	1	b	1	1	1	0	d	NA	a	1	borrow	a	d	Lịch Sử Việt Nam bằng tranh Conan	yes	d	a	1	Conan Cậu bé bút chì
1602	9.207	43073	9	8	Male	6.5	0	0	0	4	4	1	d	Bộ đội	Soldier	Làm ruộng	Farmer	Labor	45	UnderHi	Làm ruộng	Farmer	Labor	50	UnderHi	med	no	NA	1	b	1	1	1	0	f	Sách Sinh Học	a	1	borrow	a	c	Khảo cổ dễ sợ Những câu truyện về tinh thần học hỏi	yes	a	a	1	The Knowledge: Khủng long khủng kinh 1000 câu hỏi Vì Sao Doraemon
1613	9.212	43073	9	8	Female	6.5	0	0	0	2	2	1	b	Nghệ sĩ	Artist	Bán hàng	Seller	Labor	39	UnderHi	Bán hàng	Seller	Labor	37	UnderHi	med	no	NA	1	b	1	1	1	1	a	NA	a	1	buy	a	a	Tình yêu thương bất tận của mẹ Kĩ năng sống	yes	a	a	1	Truyện ngắn Nam Cao Bài thơ hay của Bác Hồ
1623	9.223	43073	9	8	Male	6.5	0	0	0	1	2	1	b	Bác sĩ	Doctor	Làm ruộng	Farmer	Labor	40	Hi	Công nhân	Worker	Labor	35	Hi	med	no	NA	1	a	0	2	1	1	a	NA	a	1	buy	a	c	Mùa châu chấu Ghềnh và sóng	yes	b	a	1	Tuyển tập các tác phẩm văn học Kí ức xôn xao 1000 câu hỏi Vi Sao
1625	9.225	43073	9	8	Female	6.5	0	0	0	1	2	1	d	Bác sĩ	Doctor	Công nhân	Worker	Labor	37	Hi	Công nhân	Worker	Labor	34	Hi	med	no	NA	1	a	0	2	2	1	c	NA	a	1	buy	b	a	Truyện Kiều Harry Porter	yes	a	a	1	Tuyển tập tác phẩm của Nam Cao Tôi thấy hoa vàng trên cỏ xanh Thám tử lừng danh Conan
1627	9.22	43073	9	8	Female	6.5	0	0	0	1	2	1	b	Bác sĩ	Doctor	Làm ruộng	Farmer	Labor	37	UnderHi	Công nhân	Worker	Labor	35	UnderHi	med	no	NA	1	a	0	2	1	1	a	NA	a	1	borrow	a	a	Truyện Kiều Tuyển tập các tác phẩm của Nguyên Hồng	yes	a	a	1	Truyện Kiều Tuyển tập các tác phẩm của Nguyên Hồng Quà tặng trong đêm Trung Thu
1650	9.248	43073	9	8	Female	6.5	0	0	0	4	4	1	b	Nhân viên ngân hàng	Banker	Thợ xây	Worker	Labor	52	UnderHi	Làm ruộng	Farmer	Labor	51	UnderHi	rich	yes	4000000	1	e	1	2	3	1	a	NA	a	1	borrow	d	a	Truyện ngắn Nam Cao Dagestan của tôi	yes	a	a	1	Dế Mèn phiêu lưu ký Tắt Đèn Tấm gương đạo đức Hồ Chí Minh
1737	9.323	43073	9	9	Male	6.5	0	0	0	2	2	1	f	Cơ khí	Engineer	Làm ruộng	Farmer	Labor	40	UnderHi	Làm ruộng	Farmer	Labor	41	UnderHi	med	no	NA	1	f	1	2	2	0	e	NA	a	1	borrow	d	a	Một ng	yes	a	a	1	10 vạn câu hỏi Vì Sao Bí quyết teen thành công Khủng long khinh
1872	2.208	43076	4	8	Female	6.5	0	0	0	3	3	1	c	Công an	Police officer	Xây dựng	Worker	Labor	42	Hi	Nông dân	Farmer	Labor	39	UnderHi	med	no	NA	1	a	0	2	3	0	b	NA	a	1	borrow	d	c	Đắc nhân tâm Đối nhân xử thế	yes	a	a	1	Danh ngôn cuộc sống Giao tiếp ứng xử Phút dành cho cha
1874	2.213	43076	4	8	Female	6.5	0	0	0	2	2	1	b	Bác sĩ	Doctor	Nông dân	Farmer	Labor	40	Hi	Nông dân	Farmer	Labor	37	Hi	med	no	NA	1	f	1	1	1	1	f	Quà tặng cuộc sống	a	1	borrow	a	a	Quà tặng cuộc sống	yes	a	a	1	Gió lạnh đầu mùa About, tôi muốn biết về mọi thứ 100 khám phá khoa học vĩ đại
1889	2.212	43076	4	8	Male	6.5	0	0	0	0	0	1	f	Kĩ sư	Engineer	Xây dựng	Worker	Labor	38	Hi	Nông dân	Farmer	Labor	38	Hi	med	no	NA	1	b	1	2	2	1	a	NA	a	1	buy	b	b	Lịch sử Địa lí	yes	a	a	1	Dế Mèn phiêu lưu kí Người lái đò Cô giáo em
1892	2.228	43076	4	8	Male	6.5	0	0	0	3	3	1	a	Nông dân	Farmer	Nông dân	Farmer	Labor	49	UnderHi	Nông dân	Farmer	Labor	47	UnderHi	med	no	NA	1	e	1	2	2	0	e	NA	a	1	buy	a	b	Dế Mèn phiêu lưu kí Hai cây phong	yes	d	a	1	Doraemon Conan Ô Long viện
1894	2.207	43076	4	8	Female	6.5	0	0	0	2	2	1	e	Bác sĩ	Doctor	Nông dân	Farmer	Labor	50	UnderHi	Nông dân	Farmer	Labor	44	UnderHi	med	no	NA	1	f	1	2	1	0	a	NA	a	1	borrow	c	c	Truyện cổ tích Giới thiệu về lịch sử	yes	c	a	1	Danh ngôn cuộc sống Phút dành cho cha Gió lạnh đầu mùa
2051	2.197	43076	4	8	Male	6.5	0	0	0	1	2	1	c	Phiên dịch	Interpreter	Nông dân	Farmer	Labor	40	Hi	Nông dân	Farmer	Labor	34	Hi	med	no	NA	1	b	1	2	NA	0	f	Sách ngoại ngữ	a	1	borrow	b	a	Cách đánh trọng âm và đuôi trong tiếng anh Cách dùng ngữ điệu trong tiếng anh	yes	b	a	1	Harry Potter Trên sa mạc và trong rừng thẳm
2083	2.53	43076	4	6	Female	6.5	0	0	0	2	3	1	b	Bác sĩ	Doctor	Công Nhân	Worker	Labor	NA	Hi	Công nhân	Worker	Labor	NA	NA	med	no	NA	1	b	1	2	2	0	d	NA	a	1	buy	a	d	Xao xuyến tuổi học trò Dế Mèn phiêu lưu kí	no	b	a	1	Tình cha con Tên lửa của tôi Tình mẫu tử
2125	2.154	43076	4	7	Female	6.5	0	0	0	3	3	1	e	Giáo viên	Teacher	Thợ xây	Worker	Labor	55	UnderHi	Nông dân	Farmer	Labor	46	UnderHi	med	no	NA	1	a	0	2	1	1	a	NA	a	1	borrow	a	a	Lịch sử Việt Nam Hạt giống tâm hồn	yes	b	a	1	Doraemon Cậu bé bút chì Võ thuật
2135	2.144	43076	4	7	Female	6.5	0	0	0	1	3	1	d	Giáo viên	Teacher	Công Nhân	Worker	Labor	40	UnderHi	Công nhân	Worker	Labor	34	UnderHi	med	yes	9000000	1	b	1	1	1	0	e	NA	a	1	buy	c	a	Kĩ năng sống Quà tặng cuộc sống	yes	c	a	1	Hạt giống tâm hồn Tôi tài giỏi bạn cũng thế Lịch sử Việt Nam
2238	8.289	43076	8	8	Female	6.5	0	0	0	2	2	1	b	Nhà Thám Hiểm	Explorer	NA	NA	NA	NA	Hi	NA	NA	NA	NA	NA	med	NA	NA	1	b	1	2	2	0	a	NA	a	1	borrow	a	b	Khám phá vũ trụ Sách dạy vẽ về vũ trụ	yes	b	a	1	Khám phá vũ trụ Cậu bé bút chì truyện cổ tích
2441	13.143	43073	13	7	Male	6.5	0	0	0	1	1	1	e	Cầu thủ bóng đá	Footballer	Thợ xây	Worker	Labor	34	UnderHi	Công nhân	Worker	Labor	35	UnderHi	med	no	NA	1	f	1	2	1	0	f	Hướng dẫn chơi thể thao	a	1	buy	b	b	7 viên ngọc rồng 10 vạn câu hỏi vì sao	yes	b	a	1	Cuộc đời của Naruto conan hạt giống tâm hồn
2443	13.144	43073	13	7	Male	6.5	0	0	0	2	2	NA	d	Cầu thủ bóng đá	Footballer	Nông dân	Farmer	Labor	37	UnderHi	Nông dân	Farmer	Labor	33	UnderHi	med	NA	NA	1	f	1	1	1	1	c	NA	a	1	borrow	d	c	Shin cậu bé bút chì conan	yes	a	a	1	dế mèn phưu lưu kí doraemon truyện cổ andersen
2674	15.44	43071	15	6	Female	6.5	0	0	0	3	3	1	b	Bác sĩ	Doctor	Nông dân	Farmer	Labor	53	UnderHi	Bán hàng	Seller	Labor	43	UnderHi	med	no	NA	1	a	0	2	2	0	a	NA	a	1	borrow	b	c	Không gia đình, hạt giống tâm hồn	yes	b	a	1	Tắt đèn, Truyện Kiều, Bí mật học đường
2775	8.109	43076	8	7	Female	6.5	0	0	0	1	2	1	b	Bác sĩ	Doctor	Nông dân	Farmer	Labor	43	Hi	Buôn bán	Seller	Labor	35	NA	rich	no	NA	1	a	0	1	1	1	a	NA	a	1	borrow	d	a	55 cách để tự tin Búp sen xanh	yes	b	a	1	Chắp cánh ước mơ Lòng trung trực Cây tre trăm đốt
2931	16.381	43075	16	8	Female	6.5	0	0	0	3	3	1	d	Không xác định	NA	Nông dân	Farmer	Labor	48	UnderHi	Nông dân	Farmer	Labor	49	UnderHi	med	no	NA	1	c	1	2	1	0	a	NA	a	1	borrow	d	a	Truyện ngụ ngôn Ngoại ngữ	yes	a	a	1	Truyện văn học Ngụ ngôn Ngoại ngữ
3010	15.63	43071	15	6	Male	6.5	0	0	0	1	2	1	f	Bác sĩ	Doctor	Tài xế	Driver	Labor	34	Hi	Công nhân	Worker	Labor	33	Hi	rich	yes	NA	1	b	1	1	1	1	f	kĩ thuật	a	1	buy	a	c	bí mật đại dương, kĩ năng sinh tồn	yes	a	a	1	Doraemon, Conan, Shin cậu bé bút chì
3106	16.439	43074	16	8	Female	6.5	0	0	0	3	3	0	b	Giáo viên	Teacher	Thợ xây	Worker	Labor	42	UnderHi	Nông dân	Farmer	Labor	40	UnderHi	med	no	NA	1	b	1	1	1	0	d	NA	a	1	buy	a	a	Shin Doraemon	yes	d	a	1	Chìa khóa vàng vật lý Những chuyện cổ tích Việt Nam Ô long viện
3153	16.462	43074	16	8	Female	6.5	0	0	0	2	3	1	b	Bác sĩ	Doctor	không xác định	NA	NA	NA	NA	Nông dân	Farmer	Labor	36	UnderHi	poor	no	NA	0	a	0	2	2	0	a	NA	a	1	borrow	b	a	Lịch sử Việt Nam Những ngày thơ ấu	yes	a	a	1	Học những kĩ năng để thành công Những ngày thơ ấu Búp sen xanh
3174	16.475	43074	16	8	Female	6.5	0	0	0	1	2	1	b	Giáo viên	Teacher	Thợ xây	Worker	Labor	36	UnderHi	Nông dân	Farmer	Labor	35	UnderHi	med	no	NA	1	a	0	2	2	1	a	NA	a	1	borrow	a	a	Truyện cổ tích Những truyện hay giúp trẻ trưởng thành trí tuệ	yes	b	a	1	Câu đố Cổ tích Việt Nam Ngày em đến trường
3234	16.488	43074	16	8	Male	6.5	0	0	0	1	3	1	f	bác sĩ	Doctor	nông dân	Farmer	Labor	37	UnderHi	nông dân	Farmer	Labor	34	Uni	med	no	NA	0	b	1	1	1	0	d	NA	a	1	gift	d	a	hạt giống tâm hồn lịch sử việt nam	yes	c	a	1	tôi muốn biết ở đâu đạo và đời ma văn kháng mùa lạc
3269	3.45	43071	6	9	Male	6.5	0	0	0	2	2	1	NA	Kế toán	Accountant	Nông dân	Farmer	Labor	50	Hi	Công nhân	Worker	Labor	45	UnderHi	med	no	NA	1	b	1	1	1	0	f	Tiểu thuyết	a	1	buy	a	d	Conan Hỏa ngục	yes	a	a	1	Doraemon Hỏa ngục
3296	16.528	43074	16	9	Male	6.5	0	0	0	1	4	1	b	chủ tịch nước	Politician	thợ xây	Worker	Labor	38	NA	công nhân	Worker	Labor	31	NA	poor	no	NA	1	c	1	2	3	0	e	NA	a	1	buy	b	b	sách hướng dẫn nghề sách văn học	yes	a	a	1	lịch sử việt nam robinson ngoài đảo hoang văn học cả nước
3297	16.529	43074	16	9	Male	6.5	0	0	0	1	2	1	e	youtuber	Public figure	thú y	Vet	Intellectuals	NA	NA	công nhân	Worker	Labor	NA	NA	med	NA	NA	1	d	1	2	2	0	e	NA	a	1	buy	b	c	truyện cổ tích truyện kiều	yes	d	a	1	lịch sử việt nam conan sherlock holmes
3361	3.7	43071	6	9	Female	6.5	0	0	0	1	2	1	d	Kĩ sư	Engineer	Công Nhân	Worker	Labor	37	UnderHi	Công nhân	Worker	Labor	35	UnderHi	med	no	NA	0	a	0	1	2	0	a	NA	a	1	borrow	c	b	Sherlock Homles Chicken for the soun	yes	d	a	1	dế Mèn Mật lệnh u đỏ Chiếc lá thuộc bài
3394	16.82	43074	16	6	Female	6.5	0	0	0	3	2	1	a	giáo viên	Teacher	xây dựng	Worker	Labor	48	Hi	làm ruộng	Farmer	Labor	41	Hi	med	no	NA	1	a	0	1	1	0	a	NA	a	1	buy	b	a	bí ẩn tự nhiên vũ trụ 100 phát minh làm nên lịch sử	yes	c	a	1	tấm cám khoa học tự nhiên
3396	16.84	43074	16	6	Female	6.5	0	0	0	2	2	1	b	giáo viên	Teacher	xây dựng	Worker	Labor	43	Hi	công nhân	Worker	Labor	39	Hi	med	no	NA	1	b	1	2	3	0	a	NA	a	1	buy	a	a	bàn có 5 chỗ ngồi túp lều của bác tôm	yes	b	a	1	NA
3539	15.154	43071	15	7	Male	6.5	0	0	0	1	3	1	b	Bác sĩ	Doctor	Tài xế	Driver	Labor	37	UnderHi	Công nhân	Worker	Labor	35	Hi	med	NA	NA	1	d	1	2	2	0	d	NA	a	1	borrow	b	a	cây sanh lành khanh, shin	yes	b	a	1	Truyện cười, truyện cổ tích, conan
3540	15.155	43071	15	7	Female	6.5	0	0	0	3	3	NA	e	Diễn viên	Actor	NA	NA	NA	NA	NA	Công nhân	Worker	Labor	48	UnderHi	med	no	NA	1	a	0	2	1	0	a	NA	a	1	borrow	b	NA	Trại hoa vàng, thật thà	yes	b	a	1	Thế giới động vật, câu chuyện về cậu bé piochimo, chú bé rắc rối
3541	15.156	43071	15	7	Male	6.5	0	0	0	3	4	1	a	Giám đốc	Director	Nông dân	Farmer	Labor	46	Hi	Công nhân	Worker	Labor	41	UnderHi	med	no	NA	1	d	1	1	2	0	b	NA	a	1	borrow	d	d	Truyện tranh, danh nhân văn hóa thế giới	yes	b	a	1	Lịch sử nước ta, hạt giống tâm hồn, chú bé rắc rối
3542	15.157	43071	15	7	Male	6.5	0	0	0	1	2	1	e	công an	Police officer	Nông dân	Farmer	Labor	37	UnderHi	Giày da	Worker	Labor	35	Hi	med	no	NA	1	a	0	2	2	1	c	NA	a	1	borrow	b	c	Lịch sử nước Việt bằng tranh, một tấm gương sáng	yes	c	a	1	thế giới động vật, sách toán học, nhà bác học toán
3543	15.158	43071	15	7	Female	6.5	0	0	0	3	3	1	e	Ca sĩ	Singer	Nông dân	Farmer	Labor	37	UnderHi	Công nhân	Worker	Labor	NA	Hi	med	no	NA	1	a	0	2	1	0	a	NA	a	1	borrow	b	a	thế giới động vật, gương sáng người xưa	yes	b	a	1	harry potter, truyện tranh về lịch sử, conan
3549	15.16	43071	15	7	Female	6.5	0	0	0	2	3	1	e	Diễn viên	Actor	Nông dân	Farmer	Labor	40	Hi	Công nhân	Worker	Labor	33	NA	med	no	NA	1	a	0	1	2	1	a	NA	a	1	borrow	b	b	ngụ ngôn cổ điển phương tây, thật thà	yes	a	a	1	kỹ năng sống, sách về khoa học viễn tưởng, sách về lịch sử nước ta
3555	15.161	43071	15	7	Female	6.5	0	0	0	2	3	1	e	Bác sĩ	Doctor	Công nhân	Worker	Labor	36	Hi	Công nhân	Worker	Labor	38	Hi	med	no	NA	1	a	0	2	2	0	a	NA	a	1	borrow	b	a	thế giới động vật, lịch sử về vũ trụ	yes	b	a	1	toán học, văn học, kỹ năng sống
3572	15.167	43071	15	7	Female	6.5	0	0	0	1	3	1	a	Bác sĩ	Doctor	Nông dân	Farmer	Labor	35	UnderHi	Nông dân	Farmer	Labor	33	UnderHi	med	no	NA	1	a	0	1	1	0	a	NA	a	1	borrow	b	a	Trai hoa vàng, thế giới động vật	yes	b	a	1	chú bé rắc rối, 50 tác phẩm văn học thiếu nhi, học cách làm việc
3573	15.168	43071	15	7	Male	6.5	0	0	0	1	3	1	f	Ca sĩ	Singer	Thợ xây	Worker	Labor	35	Hi	Công nhân	Worker	Labor	32	Hi	med	no	NA	1	a	0	2	2	0	a	NA	a	1	borrow	a	c	thế giới động vật, lược đồ nước việt nam bằng chanh	yes	b	a	1	sách tâm lý, kỹ năng sống, chia sẻ mỗi ngày
3575	15.17	43071	15	7	Female	6.5	0	0	0	2	3	1	e	Công nhân	Worker	Nông dân	Farmer	Labor	37	UnderHi	Công nhân	Worker	Labor	35	Hi	med	no	NA	1	d	1	2	NA	0	NA	NA	a	1	borrow	d	b	tấm gương đạo đức người xưa, thế giới động vật	yes	b	a	1	Robinson ngoài đảo hoang, đảo giấu vàng, trại hoa vàng
3576	15.171	43071	15	7	Male	6.5	0	0	0	1	2	1	e	Bác sĩ	Doctor	Nông dân	Farmer	Labor	35	UnderHi	Công nhân	Worker	Labor	32	UnderHi	med	no	NA	NA	a	0	2	NA	1	b	NA	a	1	borrow	b	a	động vật thực vật, trại hoa vàng	yes	b	a	1	Thần đèn, những danh nhân trong lịch sử Việt Nam, khoa học vũ trụ
3577	15.172	43071	15	7	Male	6.5	0	0	0	3	3	1	e	NA	NA	Nông dân	Farmer	Labor	43	Hi	Nông dân	Farmer	Labor	40	Hi	med	no	1000000	1	a	0	2	1	0	a	NA	a	1	borrow	a	a	thật thà,	yes	a	a	1	vũ khí chiến tranh, xác ướp ai cập, thiên nhiên
3810	16.147	43074	16	6	Female	6.5	0	0	0	2	2	1	a	bác sĩ	Doctor	làm ruộng	Farmer	Labor	43	Hi	giáo viên	Teacher	Intellectuals	43	Uni	med	no	NA	1	b	1	1	1	1	c	NA	a	1	buy	b	b	cổ tích sọ dừa cổ tích thạch sanh	yes	d	a	1	tấm cám truyện huỳnh lập doremon conan
3996	3.197	43071	6	7	Male	6.5	0	0	0	1	1	1	f	Cảnh sát	Police officer	Nông dân	Farmer	Labor	42	UnderHi	Giáo viên	Teacher	Intellectuals	NA	Uni	med	NA	NA	1	b	1	1	1	0	c	NA	a	1	borrow	a	b	Kĩ thuật thuở ban sơ Khoa học và kĩ thuật	yes	a	a	1	Tình cha Búp sen xanh An toàn giao thông
4024	10.127	43074	5	6	Male	6.5	0	0	0	1	2	1	f	kĩ sư	Engineer	công nhân	Worker	Labor	35	Hi	công nhân	Worker	Labor	32	Hi	med	no	NA	1	a	0	2	1	NA	e	NA	a	1	buy	d	b	hướng dẫn an toàn giao thông bài học vô giá	yes	c	a	1	tha thứ ông gió bà mưa phát minh quái quỷ
4087	3.21	43071	6	7	Male	6.5	0	0	0	2	2	1	e	Giáo sư	Scientist	Tài xế	Driver	Labor	50	Hi	Xuất khẩu lao động	Worker	Labor	45	Uni	med	yes	12000000	1	f	1	2	1	1	f	Doraemon	a	1	buy	a	a	Conan Doraemon	yes	a	a	1	Kĩ Năng bóng rổ Kĩ năng bơi lội Chơi cờ vua
4103	10.181	43075	5	7	Female	6.5	0	0	0	2	3	1	b	giáo viên	Teacher	nông dân	Farmer	Labor	45	UnderHi	nông dân	Farmer	Labor	34	UnderHi	med	yes	12000000	1	b	1	2	2	1	a	NA	a	1	borrow	d	a	cậu bé rắc rối thật thà	yes	b	a	1	NA
4120	10.198	43075	5	7	Female	6.5	0	0	0	1	2	1	d	bác sĩ	Doctor	thợ xây	Worker	Labor	37	UnderHi	công nhân	Worker	Labor	33	UnderHi	rich	yes	10000000	1	c	1	2	2	0	a	NA	a	1	borrow	b	a	học cách làm việc trại hoa vàng	yes	b	a	1	bong bóng lên trời tình cha con những tấm lòng cao cả
4135	15.239	43071	15	8	Male	6.5	0	0	0	4	4	1	f	NA	NA	Nông dân	Farmer	Labor	53	UnderHi	Nông dân	Farmer	Labor	52	UnderHi	med	no	NA	1	a	0	2	2	0	a	NA	a	1	borrow	a	b	Truyện tranh, truyện cổ tích VN	yes	a	a	1	Dế mèn phưu lưu ký, Truyện chí phèo, Truyện tranh
4259	10.262		5	7	Male	6.5	0	0	0	2	2	NA	d	học việc	Apprentice	nông dân	Farmer	Labor	54	UnderHi	nông dân	Farmer	Labor	45	UnderHi	rich	no	NA	1	b	1	2	NA	0	e	NA	a	1	gift	b	a	quyền chủ đế quân nghệ doraemon	yes	a	a	1	những cuộc phưu lưu kì thú khám phá khoa học những điều xung quanh em
4261	10.264		5	7	Male	6.5	0	0	0	2	3	1	e	nhà bác học	Scientist	nông dân	Farmer	Labor	36	Hi	nông dân	Farmer	Labor	36	Hi	med	no	10000000	1	a	0	2	2	1	a	NA	a	1	borrow	d	d	doraemon cây bút thần	yes	c	a	1	cây bút thần cô bé lọ lem nàng bạch tuyết và 7 chú lùn
4263	10.266		5	7	Male	6.5	0	0	0	1	3	1	a	vận động viên	Athlete	nông dân	Farmer	Labor	34	UnderHi	nông dân	Farmer	Labor	33	UnderHi	med	no	NA	1	b	1	1	1	0	a	NA	a	1	borrow	a	d	giai thoại về các nhà khoa học vật lí lí thú	yes	a	a	1	giai thoại về các nhà khoa học vật lí lí thú túp lều bác tôm
4295	10.298		5	8	Male	6.5	0	0	0	2	2	1	f	vận động viên	Athlete	nông dân	Farmer	Labor	46	UnderHi	nông dân	Farmer	Labor	NA	UnderHi	med	no	NA	1	b	1	2	2	0	f	tiểu thuyết	a	1	borrow	b	b	hy vọng về những chuyện không thành nanh trắng	yes	d	a	1	3 ngày ở vương quốc tí hon truyện ngắn ngô tất tố truyện cổ grim
4303	10.306	43074	5	8	Female	6.5	0	0	0	1	3	1	b	bác sĩ	Doctor	nông dân	Farmer	Labor	42	NA	nông dân	Farmer	Labor	NA	NA	NA	NA	NA	NA	a	0	2	1	0	a	NA	a	1	borrow	a	d	kĩ năng giao tiếp tình bất tử của mẹ	NA	a	a	1	NA
4304	10.307	43074	5	8	Female	6.5	0	0	0	1	3	1	e	giáo viên	Teacher	nông dân	Farmer	Labor	NA	NA	nông dân	Farmer	Labor	NA	NA	NA	yes	3000000	1	a	0	3	1	0	a	NA	a	1	borrow	d	a	cuốn sách nói về gia đình kĩ năng giao tiếp	yes	a	a	1	NA
4365	10.329	43074	5	8	Male	6.5	0	0	0	1	3	1	f	công an	Police officer	công nhân	Worker	Labor	NA	NA	công nhân	Worker	Labor	NA	NA	med	no	NA	1	a	0	2	2	0	a	NA	a	1	buy	a	a	bụi phấn kĩ năng giao tiếp	yes	a	a	1	NA
4388	10.353	43074	5	8	Female	6.5	0	0	0	2	3	1	e	giáo viên	Teacher	nông dân	Farmer	Labor	40	UnderHi	nông dân	Farmer	Labor	36	UnderHi	med	no	NA	1	a	0	2	2	1	c	NA	a	1	borrow	b	a	lịch sử nước ta kể lại học ăn học nói học gói học mở	yes	a	a	1	phùng hưng đánh hổ lịch sử cha ông ta tráng sĩ cao thắng
4391	10.356	43074	5	8	Male	6.5	0	0	0	2	3	1	e	công an	Police officer	nông dân	Farmer	Labor	NA	UnderHi	nông dân	Farmer	Labor	NA	UnderHi	med	no	NA	0	c	1	1	1	0	d	NA	a	1	borrow	d	d	học ăn học nói học gói học mở kì quan thiên nhiên	yes	d	a	1	NA
4524	10.433	43074	5	9	Male	6.5	0	0	0	0	0	1	f	sửa chữa	Worker	nông dân	Farmer	Labor	39	UnderHi	công nhân	Worker	Labor	39	UnderHi	med	no	NA	1	f	1	2	1	NA	e	NA	a	1	borrow	d	d	conan doraemon	yes	d	a	1	shin doraemon truyện kiều
4536	15.314	43071	15	9	Male	6.5	0	0	0	1	2	1	f	đầu bếp	Chef	Nông dân	Farmer	Labor	39	UnderHi	Nông dân	Farmer	Labor	35	UnderHi	med	no	NA	1	f	1	2	1	0	d	NA	a	1	borrow	a	a	doraemon, hạt giống tâm hồn	NA	b	a	1	bầu trời sụp đổ, kỹ năng sống biết lựa chọn, tản đà
4567	16.209	43074	16	7	Male	6.5	0	0	0	4	4	1	a	ca sĩ	Singer	thợ xây	Worker	Labor	43	UnderHi	phụ hồ	Worker	Labor	44	UnderHi	med	no	NA	1	a	0	1	1	0	b	NA	a	1	borrow	b	a	mèo dạy hải âu bay nghìn lẻ một đêm	yes	a	a	1	NA
4632	15.359	43071	15	9	Male	6.5	0	0	0	1	3	NA	f	NA	NA	Công nhân	Worker	Labor	42	UnderHi	Công nhân	Worker	Labor	43	UnderHi	med	no	NA	1	f	1	1	1	0	e	NA	a	1	borrow	b	d	Truyện Kiều, Tắt đèn	yes	b	a	1	bụi phấn, quà tặng cuộc sống, máy móc dưới nước
4638	15.361	43071	15	9	Female	6.5	0	0	0	3	4	1	e	Kinh doanh	Businessman	Nông dân	Farmer	Labor	45	UnderHi	Nông dân	Farmer	Labor	40	UnderHi	med	no	NA	1	b	1	2	1	0	a	NA	a	1	borrow	NA	d	Truyện cổ tích, văn học	yes	a	a	1	Chiến tranh và hòa bình, tập truyện của Ngô Tất Tố, những ngày thơ ấu
4653	15.366	43071	15	9	Male	6.5	0	0	0	4	4	1	f	Kinh doanh	Businessman	Nông dân	Farmer	Labor	59	UnderHi	Nông dân	Farmer	Labor	55	UnderHi	med	no	NA	1	b	1	2	1	0	d	NA	a	1	borrow	d	d	Đắc Nhân Tâm, Tý Quậy	yes	d	a	1	chiến tranh và hòa bình, Chí phèo, tuyển tập Ngô Tất Tố
4661	15.37	43071	15	9	Male	6.5	0	0	0	2	2	1	f	NA	NA	Nông dân	Farmer	Labor	38	UnderHi	Nông dân	Farmer	Labor	35	UnderHi	med	no	NA	1	b	1	2	1	0	e	NA	a	1	borrow	d	d	conan, doraemon	yes	c	a	1	Chiến tranh và hòa bình, Tắt đèn
4667	15.373	43071	15	9	Male	6.5	0	0	0	2	2	1	f	Kinh doanh	Businessman	Nông dân	Farmer	Labor	44	UnderHi	Nông dân	Farmer	Labor	36	UnderHi	rich	no	NA	1	a	0	2	1	0	a	NA	a	1	borrow	a	b	những điều bình dị về tình cảm gia đình, truyện trung đại văn học Việt nam	yes	b	a	1	Chiến tranh và hòa bình, đắc nhân tâm, chí phèo
4746	10.521		5	9	Female	6.5	0	0	0	4	5	1	c	quản lí	Manager	nông dân	Farmer	Labor	49	NA	nông dân	Farmer	Labor	45	NA	poor	NA	2000000	1	b	1	1	NA	1	e	NA	a	1	borrow	d	d	sống sáng suốt hy vọng những điều thất bại	yes	d	a	1	sông đông êm đềm
4852	10.67	43074	5	6	Female	6.5	0	0	0	5	5	1	e	giáo viên	Teacher	làm ruộng	Farmer	Labor	50	UnderHi	làm ruộng	Farmer	Labor	50	UnderHi	poor	no	NA	0	c	1	3	1	1	e	NA	a	1	borrow	d	a	câu lạc bộ thắp sáng ước mơ bong bóng lên trời	yes	d	a	1	giúp học sinh tập trung vào bài học nâng cao quy trình học toán bạn bê thân thiện
4460	15.291	43071	15	9	Male	6.47	0	0	0	2	2	1	b	Dịch giả	Translator	Giáo viên	Teacher	Intellectuals	41	PostGrad	Giáo viên	Teacher	Intellectuals	40	Uni	med	NA	12000000	1	a	0	1	3	0	b	NA	a	1	buy	b	c	tôi là beeto, bỉ vỏ	yes	b	a	1	Đồi gió hú, harry potter, máu hiếm
2431	13.136	43073	13	7	Female	6.4	0	0	0	7	7	1	NA	Giáo viên	Teacher	Nông dân	Farmer	Labor	52	UnderHi	Nông dân	Farmer	Labor	53	UnderHi	med	no	NA	1	c	1	1	1	0	a	NA	a	1	borrow	a	d	truyện cổ tích doraemon	yes	d	a	1	Conan Truyện cười dân gian thế giới xung quanh
2762	8.96	43076	8	7	Male	6.4	0	0	0	1	3	1	b	NA	NA	Thợ xây	Worker	Labor	NA	UnderHi	Nông dân	Farmer	Labor	NA	UnderHi	med	no	NA	1	b	1	1	1	1	c	NA	a	1	borrow	c	d	Truyện sách khoa học	yes	b	a	1	Truyện cổ tích Sách khoa học sách về thiên nhiên
2826	16.288	43074	16	7	Female	6.4	0	0	0	4	6	1	NA	Công an	Police officer	Nông dân	Farmer	Labor	45	Hi	Không xác định	NA	Labor	45	Hi	med	yes	7000000	1	b	1	2	2	0	f	Truyện tranh	a	1	buy	a	b	Thiên mã Nhật kí công chúa	yes	d	a	1	Thám tử Sherlock Holmes Nghìn lẻ một đêm Phù thủy tập sự
3369	16.575	43074	16	9	Female	6.4	0	0	0	2	2	1	d	đầu bếp	Chef	nông dân	Farmer	Labor	42	UnderHi	nông dân	Farmer	Labor	41	UnderHi	med	no	NA	1	f	1	2	1	0	e	NA	a	1	buy	a	a	lịch sử việt nam giới thiệu về những tác giả văn chương việt nam	NA	NA	a	1	sách dạy nấu ăn sách dạy tiếng nhật các văn học nổi tiếng trên thế giới
3390	16.582	43074	16	9	Male	6.4	0	0	0	2	2	NA	a	tổng thống	Politician	nông dân	Farmer	Labor	39	NA	nông dân	Farmer	Labor	36	UnderHi	rich	no	NA	1	f	1	2	1	0	e	NA	a	1	buy	a	a	những điều cần biết về trái đất sách dạy nghề	yes	b	a	1	sách dạy nghề sách về sự tiến hóa của con người sách kĩ năng sống
3400	16.88	43074	16	6	Female	6.4	0	0	0	1	2	1	d	cô giáo	Teacher	xây dựng	Worker	Labor	34	Hi	công nhân	Worker	Labor	33	Hi	med	no	NA	1	b	1	1	1	0	a	NA	a	1	buy	a	b	100 phát minh tự nhiên vũ trụ	yes	NA	a	1	tự nhiên và thiên nhiên
3797	16.133	43074	16	6	Female	6.4	0	0	0	1	2	1	c	diễn viên	Actor	thợ xây	Worker	Labor	35	Uni	giáo viên	Teacher	Intellectuals	35	Uni	med	no	NA	1	d	1	1	2	1	d	NA	a	1	buy	d	c	kì quan thế giới cỗ máy thời gian	yes	a	a	1	cô gái đến từ tương lai cô bé tí hon con rồng cháu tiên
3861	16.163	43074	16	6	Male	6.4	0	0	0	2	3	1	e	ca sĩ	Singer	làm ruộng	Farmer	Labor	42	UnderHi	làm ruộng	Farmer	Labor	41	Hi	NA	no	NA	1	c	1	2	2	0	a	NA	a	1	borrow	d	a	doremon conan	yes	b	a	1	tấm cám đảo dấu vàng doremon
680	9.105	43073	9	7	Female	6.3	0	0	0	4	4	1	b	Thiết kế thời trang	Fashion designer	làm ruộng	Farmer	Labor	50	UnderHi	Làm ruộng	Farmer	Labor	50	UnderHi	med	no	NA	1	f	1	1	1	0	f	Truyện tranh	a	1	buy	d	c	Lịch sử Việt Nam Hạt giống tâm hồn	yes	d	a	1	Những bài văn hay Dạy trẻ có tính thần dũng cảm Tình mẹ
699	11.228	43071	11	9	Female	6.3	0	0	0	3	3	1	a	Đầu bếp	Chef	Làm ruộng	Farmer	Labor	43	UnderHi	Làm ruộng	Farmer	Labor	42	UnderHi	med	no	NA	1	c	1	1	1	0	e	NA	a	1	borrow	a	a	Lắng nghe lời thì thầm của trái tim Hạt giống tâm hồn	yes	b	a	1	Truyện kể về những danh nhân toán học What tôi muốn biết cái gì Phòng chống ngộ độc
776	11.62	43071	11	7	Female	6.3	0	0	0	3	4	1	a	Công nhân	Worker	Làm ruộng	Farmer	Labor	42	UnderHi	Công nhân	Worker	Labor	38	UnderHi	poor	no	NA	1	b	1	1	1	1	d	NA	a	1	borrow	a	a	Bí ẩn về cơ thể người Tắt đèn	yes	c	a	1	Doraemon 10 vạn câu hỏi vì sao Sự tích quả dưa hấu
819	11.49	43071	11	6	Female	6.3	0	0	0	1	3	1	b	Cô giáo	Teacher	Thợ xây	Worker	Labor	36	UnderHi	Công nhân	Worker	Labor	32	UnderHi	med	no	NA	NA	a	0	1	2	0	a	NA	a	1	buy	a	b	Sách văn học Sách tiếng Anh	yes	b	a	1	Cổ tích tổng hợp
914	11.149	43071	11	8	Female	6.3	0	0	0	1	4	1	d	Giáo viên	Teacher	Nông dân	Farmer	Labor	37	Hi	Nông dân	Farmer	Labor	36	Hi	med	no	NA	1	a	0	2	2	0	c	NA	a	1	gift	b	c	Dám tha thứ Học sinh thanh lịch	yes	b	a	1	Tấm Cám Thánh Gióng Vì sao Tôm muốn biết vì sao?
977	11.39	43071	11	6	Male	6.3	0	0	0	3	0	1	f	Công nhân	Worker	Thợ xây	Worker	Labor	45	UnderHi	Công nhân	Worker	Labor	45	UnderHi	med	no	NA	1	b	1	1	1	0	e	NA	a	1	borrow	b	a	Thám tử lừng danh Conan Doraemon	yes	d	a	1	Nhổ củ cải Cây tre trăm đốt Cậu bé bút chì
1000	14.73	43071	14	7	Female	6.3	0	0	0	3	5	1	b	Công an	Police officer	Tự do	Freelancer	Labor	47	UnderHi	Tự do	Freelancer	Labor	47	UnderHi	rich	no	NA	1	a	0	2	2	1	a	NA	a	1	borrow	b	a	Hạt giống tâm hồn Học cho ai? Học để làm gì?	yes	a	a	1	Chiếc lá thuộc bài Chiếc hộp thần bí Lịch sử Việt Nam
1020	9.121	43073	9	7	Female	6.3	0	0	0	1	2	1	b	bác sĩ	Doctor	Công nhân	Worker	Labor	33	UnderHi	Công nhân	Worker	Labor	36	UnderHi	med	no	NA	1	a	0	1	1	0	e	NA	a	1	borrow	b	d	Gió lạnh đầu mùa Quà tặng cuộc sống	yes	a	a	1	Việt nam lịch sử TRần trọng kim Núi lửa nóng hơn lửa Cánh buồn đỏ thắm
1029	9.131	43073	9	NA	Male	6.3	0	0	0	2	2	1	d	ca sĩ	Singer	Làm thợ	Worker	Labor	43	UnderHi	làm thợ	Worker	Labor	41	UnderHi	med	no	NA	0	b	1	1	1	0	e	NA	a	1	buy	b	d	Mẹ sẽ không lạnh nữa	yes	d	a	1	gió lạnh đầu mùa núi lửa nóng hơn cả lửa Phòng tránh tai nạn cho trẻ em học sinh
1210	1.15	43077	1	6	Female	6.3	0	0	0	2	3	1	a	Đầu bếp	Chef	Nông dân	Farmer	Labor	45	UnderHi	Không xác định	NA	Labor	39	Hi	med	no	NA	1	a	0	1	1	0	d	NA	a	1	borrow	a	a	Bí mật học đường Buratino	yes	d	a	1	Những câu chuyện nghệ thuật Danh nhân Việt Nam
1259	1.122	43077	1	8	Female	6.3	0	0	0	1	0	1	d	Phiên dịch viên	Interpreter	Thợ mộc	Worker	Labor	35	UnderHi	Công nhân	Worker	Labor	34	UnderHi	rich	no	NA	1	c	1	1	1	1	e	NA	a	1	borrow	b	a	Tôi muốn biết về mọi thứ Hãy lạc quan để vui sống	yes	b	a	1	Truyện Kiều Thám tử lừng danh Conan Trạng Quỳnh
2109	2.17	43076	4	7	Male	6.3	0	0	0	1	2	1	f	Thợ điện	Engineer	Nông dân	Farmer	Labor	NA	UnderHi	Công nhân	Worker	Labor	NA	UnderHi	poor	no	NA	0	c	1	2	2	0	c	NA	a	1	borrow	d	a	Vũ khí chiến tranh Những nhà phát minh	yes	a	a	1	Khoa học kĩ thuật Những phát minh thay đổi cả thế giới Những thí nghiệm khổng lồ
2242	8.249	43076	8	9	Male	6.3	0	0	0	1	0	0	e	Kinh doanh	Businessman	Lái tàu	Driver	Labor	35	NA	Kinh doanh	Businessman	Labor	32	NA	med	no	NA	1	b	1	1	2	0	f	Lịch sử	a	1	borrow	NA	a	When Bụi phấn	no	a	a	1	NA
2502	16.36	43074	16	6	Female	6.3	0	0	0	1	3	1	b	giáo viên	Teacher	làm ruộng	Farmer	Labor	36	NA	làm ruộng	Farmer	Labor	35	Hi	NA	NA	NA	1	a	0	2	2	0	a	NA	a	1	borrow	a	a	truyện ngụ ngôn truyện cổ tích người lớn	NA	NA	a	1	công chúa lọ lem 12 chàng thiên nga tí quậy
2757	8.91	43076	8	7	Female	6.3	0	0	0	1	3	1	b	Bác sĩ	Doctor	Thợ xây	Worker	Labor	35	Hi	Công nhân	Worker	Labor	35	Hi	rich	no	NA	1	a	0	2	2	1	d	NA	a	1	borrow	a	d	55 cách sống để tự tin Kì quan thiên nhiên	yes	b	a	1	Những tấm lòng cao cả Những câu chuyện dành cho thiếu nhi Truyện về cuộc sống
2759	8.93	43076	8	7	Male	6.3	0	0	0	1	4	1	d	Tài xế	Driver	Thợ mộc	Worker	Labor	54	UnderHi	Nông dân	Farmer	Labor	NA	UnderHi	rich	no	NA	1	b	1	1	2	1	c	NA	a	1	borrow	d	a	Thiên nhiên hoang dã Cách để tự tin	yes	b	a	1	Hoàng tử bé Hạt giống tâm hồn Tại sao phải hành động
2794	16.26	43074	16	7	Male	6.3	0	0	0	1	2	1	a	Thợ xây	Worker	Nông dân	Farmer	Labor	35	UnderHi	Nông dân	Farmer	Labor	34	UnderHi	med	no	NA	1	b	1	1	1	0	f	Truyện tranh	a	1	borrow	a	a	Conan Doraemon	yes	d	a	1	Shin cậu bé bút chì Conan Doraemon
2807	16.273	43074	16	7	Female	6.3	0	0	0	1	3	NA	d	Bác sĩ	Doctor	Nông dân	Farmer	Labor	37	UnderHi	Nông dân	Farmer	Labor	35	NA	poor	no	NA	1	a	0	3	2	1	b	NA	a	1	borrow	d	b	Sách danh nhân Hạt giống tâm hồn	yes	a	a	1	Truyện văn học Hướng dẫn nghề Ngoại ngữ Hóa học
2924	16.373	43075	16	8	Female	6.3	0	0	0	2	2	NA	c	Giáo viên	Teacher	Nông dân	Farmer	Labor	39	UnderHi	Nông dân	Farmer	Labor	40	Hi	med	NA	20000000	0	a	0	1	1	0	a	NA	a	1	borrow	d	b	Sách danh nhân Sách nghệ thuật	yes	d	a	1	Truyện văn học Hướng dẫn nghề Ngoại ngữ
2950	16.395	43074	16	8	Male	6.3	0	0	0	1	3	NA	d	Công an	Police officer	Nông dân	Farmer	Labor	41	UnderHi	Nông dân	Farmer	Labor	37	UnderHi	rich	no	NA	1	b	1	2	1	0	c	NA	a	1	borrow	d	b	Kì quan thế giới Khám phá rừng	yes	a	a	1	Những phát minh mới Thời đại bùng nổ ý tưởng Máy móc dưới nước
2991	8.56	43076	8	6	Female	6.3	0	0	0	3	3	1	e	Giáo viên	Teacher	Nông dân	Farmer	Labor	49	UnderHi	Buôn bán	Seller	Labor	39	UnderHi	rich	no	NA	NA	e	1	1	1	0	b	NA	a	1	borrow	c	d	Kĩ năng sống Bong bóng lên trời	yes	d	a	1	Tý quậy Doraemon Kĩ năng sống
3409	16.94	43074	16	6	Female	6.3	0	0	0	3	0	1	d	cô giáo	Teacher	xây dựng	Worker	Labor	47	Hi	làm ruộng	Farmer	Labor	43	Hi	med	no	NA	1	b	1	2	2	1	a	NA	a	1	buy	b	NA	100 phát minh mới tạo nên lịch sử 360 động từ bất quy tắc	yes	d	a	1	khám phá sinh ra
3807	16.144	43074	16	6	Female	6.3	0	0	0	2	3	1	a	bộ đội	Soldier	làm ruộng	Farmer	Labor	35	UnderHi	làm ruộng	Farmer	Labor	33	UnderHi	med	no	NA	1	c	1	2	1	1	c	NA	a	1	buy	a	b	chuyện tấm cám chuyện 9 nàng tiên	yes	c	a	1	cổ tích sọ dừa hồ gươm thành gióng
3999	3.199	43071	6	7	Male	6.3	0	0	0	1	2	1	a	NA	NA	Nông dân	Farmer	Labor	39	Hi	Nội trợ	Unemployed	Labor	36	Hi	med	NA	NA	1	a	0	1	1	0	a	NA	a	1	borrow	a	a	Búp sen xanh Doraemon	yes	a	a	1	Tình cha Người mặt nạ đen Khoa học vui
4092	10.17	43075	5	7	Female	6.3	0	0	0	1	4	1	e	ca sĩ	Singer	nông dân	Farmer	Labor	31	UnderHi	công nhân	Worker	Labor	30	Hi	rich	no	NA	1	e	1	2	NA	NA	a	NA	a	1	borrow	b	a	tấm lòng cao cả lá caowf thêu 6 chữ vàng	no	b	a	1	12 nàng công chúa truyện tranh lịch sử việt nam các giao tiếp trong cuộc sống
4144	3.216	43071	6	7	Female	6.3	0	0	0	3	3	1	b	Công nhân	Worker	Nông dân	Farmer	Labor	42	UnderHi	Nông dân	Farmer	Labor	41	UnderHi	med	no	NA	1	f	1	2	3	0	a	NA	a	1	borrow	b	d	Còn chút gì để nhớ Tôi thấy hoa vàng trên cỏ xanh	yes	b	a	1	Cậu bé bút chì Doraemon Conan
4182	3.254	43071	6	6	Female	6.3	0	0	0	2	3	1	b	Bác sĩ	Doctor	Công Nhân	Worker	Labor	57	UnderHi	Công nhân	Worker	Labor	35	Hi	med	no	NA	1	f	1	1	2	0	a	NA	a	1	buy	d	b	Thần đồng đất Việt Thiên văn học	yes	a	a	1	Khám phá thế giới Doraemon Lịch sử loài người
4322	3.281	43071	3	6	Male	6.3	0	0	0	1	2	1	d	Nông dân	Farmer	Nông dân	Farmer	Labor	40	UnderHi	NA	NA	NA	36	Hi	med	yes	11000000	1	b	1	1	NA	1	c	NA	a	1	borrow	b	NA	Khoa học Doraemon	yes	b	a	1	Kĩ thuật chơi bóng rổ Sáng tạo Tiếng gọi nơi hoang dã
4643	10.471	43074	5	9	Female	6.3	0	0	0	2	3	1	f	thợ cắt tóc	Barber	nông dân	Farmer	Labor	42	UnderHi	nông dân	Farmer	Labor	36	UnderHi	med	no	NA	1	a	0	3	3	1	c	NA	a	1	borrow	b	d	dắc nhân tâm doraemon	no	d	a	1	conan vũ khí chiến tranh
2748	8.139	43076	8	7	Female	6.25	0	0	0	1	2	1	b	Bác sĩ	Doctor	Nông dân	Farmer	Labor	35	UnderHi	Nông dân	Farmer	Labor	35	UnderHi	med	no	NA	1	a	0	1	1	0	a	NA	a	1	borrow	b	d	Thật thà Lịch sử thế giới	yes	a	a	1	Tình yêu không bằng lời nói Học cách tự vệ 50 Tác phẩm văn học
2749	8.14	43076	8	7	Female	6.25	0	0	0	2	3	1	b	Bác sĩ	Doctor	Nông dân	Farmer	Labor	38	UnderHi	Nông dân	Farmer	Labor	36	UnderHi	med	no	NA	1	a	0	1	1	0	a	NA	a	1	borrow	b	d	Lịch sử thế giới Thật thà	yes	a	a	1	Học cách tự vệ 50 tác phẩm văn học Tình yêu không bằng lời nói
3338	3.6	43071	6	9	Female	6.25	0	0	0	1	2	NA	e	Đầu bếp	Chef	Nông dân	Farmer	Labor	40	UnderHi	Nông dân	Farmer	Labor	37	UnderHi	med	no	NA	1	b	1	2	2	1	a	NA	a	1	borrow	a	a	Tôn sư trọng đạo Trai nước Nam làm gì	yes	b	a	1	Chiếc lược ngà Cố hương Những đứa trẻ
4664	15.371	43071	15	9	Male	6.25	0	0	0	1	2	1	a	Kinh doanh	Businessman	Nông dân	Farmer	Labor	39	UnderHi	Nông dân	Farmer	Labor	37	UnderHi	med	no	NA	1	b	1	2	1	0	f	truyện tranh	a	1	borrow	d	b	conan, doraemon	yes	d	a	1	Chiến tranh và hòa bình, những thời thơ ấu của Nguyên Hồng, chí phèo
4678	15.379	43071	15	9	Female	6.25	0	0	0	2	3	1	b	Bác sĩ	Doctor	Nông dân	Farmer	Labor	40	Hi	Nông dân	Farmer	Labor	38	Hi	med	no	NA	1	b	1	1	1	0	a	NA	a	1	borrow	d	d	truyện cổ tích, khát vọng sống	yes	a	a	1	Chiến tranh và hòa bình, tắt đèn, chí phèo
4879	10.9	43075	5	6	Female	6.25	0	0	0	1	4	1	b	đầu bếp	Chef	kinh doanh	Businessman	Labor	35	Hi	kinh doanh	Businessman	Labor	32	UnderHi	rich	no	NA	1	f	1	2	2	0	a	NA	a	1	buy	d	b	đảo giấu vàng lớn lên trên đảo vắng	yes	b	a	1	heldi lâu đài thần kì ngựa ô yêu quý
969	11.31	43071	11	6	Male	6.2	0	0	0	2	2	1	b	Giáo viên	Teacher	Thợ xây	Worker	Labor	41	UnderHi	Công nhân	Worker	Labor	39	UnderHi	med	no	NA	1	c	1	2	1	0	d	NA	a	1	borrow	c	c	Sự tích cây khế Doraemon	yes	b	a	1	Công chúa ngủ trong rừng Aladin và cây đèn thần Thám tử lừng danh Conan
3090	16.423	43074	16	8	Male	6.2	0	0	0	1	2	1	b	Giáo sư	Scientist	Thợ xây	Worker	Labor	47	Hi	Kế toán	Accountant	Intellectuals	37	Uni	med	no	NA	1	a	0	3	3	0	a	NA	a	1	borrow	d	a	Không gia đình Sổ tay nhân vật lịch sử Việt nam	yes	a	a	1	Tuổi thơ dữ dội Tuổi thơ im lặng Những ngày thơ ấu
3147	16.455	43074	16	8	Male	6.2	0	0	0	1	2	1	e	Bộ đội	Soldier	Thợ xây	Worker	Labor	43	UnderHi	Nông dân	Farmer	Labor	37	UnderHi	med	no	NA	1	b	1	1	1	1	a	NA	a	1	buy	a	a	Những cuộc phiêu lưu của Gulliver Doraemon	yes	a	a	1	Conan Thần đồng đất việt Doraemon
3327	16.559	43074	16	9	Male	6.2	0	0	0	1	2	1	a	điện lạnh	Engineer	nông dân	Farmer	Labor	43	UnderHi	nông dân	Farmer	Labor	35	Hi	NA	no	NA	1	b	1	2	1	NA	a	NA	a	1	buy	a	a	tắt đèn sách dạy nghề	no	NA	a	1	lịch sử việt nam nghệ thuật ứng xử thông minh tráng sĩ cao thắng
3399	16.87	43074	16	6	Male	6.2	0	0	0	2	1	1	b	công an	Police officer	xây dựng	Worker	Labor	38	Hi	làm ruộng	Farmer	Labor	35	Hi	med	no	NA	1	b	1	2	1	0	a	NA	a	1	gift	a	a	conan shin cậu bé bút chì	yes	b	a	1	khám phá vũ trụ
3412	16.587	43074	16	9	Female	6.2	0	0	0	2	3	1	NA	bác sĩ	Doctor	nông dân	Farmer	Labor	40	UnderHi	nông dân	Farmer	Labor	38	UnderHi	rich	no	NA	1	b	1	2	2	0	a	NA	a	1	buy	a	a	kĩ năng sống dành cho tuổi teen tắt đèn	yes	c	a	1	hạt giống tâm hồn vượt qua thử thách tìm hiểu những nền văn hóa ả rập nghệ thuật ứng xử thông minh
3737	16.125	43074	16	6	Male	6.2	0	0	0	3	3	1	d	sửa chữa ô tô	Repairman	thợ xây	Worker	Labor	47	UnderHi	làm ruộng	Farmer	Labor	45	UnderHi	med	no	NA	0	f	1	1	1	0	e	NA	a	1	gift	b	c	doremon totto chan	yes	d	a	1	thế giới động vật khám phá rừng học cách luôn bình tĩnh
3808	16.145	43074	16	6	Female	6.2	0	0	0	1	2	1	a	công an	Police officer	làm ruộng	Farmer	Labor	39	UnderHi	làm ruộng	Farmer	Labor	37	UnderHi	med	no	NA	1	c	1	1	2	1	d	NA	a	1	borrow	a	d	truyện cười doraemon sách tìm hiểu khoa học	yes	d	a	1	chuyện cây khế sách sáng tạo truyện pokemon
3858	16.16	43074	16	6	Female	6.2	0	0	0	1	3	1	f	bác sĩ	Doctor	làm ruộng	Farmer	Labor	35	UnderHi	làm ruộng	Farmer	Labor	33	UnderHi	med	no	NA	1	a	0	1	1	0	a	NA	a	1	buy	a	a	truyện cười sách tìm hiểu về trái đất	yes	d	a	1	truyện doremon truyện cổ tích sách khám phá khoa học
4083	3.206	43071	6	7	Male	6.2	0	0	0	2	2	1	f	Đầu bếp	Chef	Nông dân	Farmer	Labor	42	UnderHi	Nông dân	Farmer	Labor	38	UnderHi	med	no	NA	1	b	1	2	2	0	a	NA	a	1	borrow	a	a	Danh nhân Khoa học đời sống	yes	a	a	1	Ngữ pháp tiếng Anh Kĩ thuật đời sống Thế giới huyền bí
4685	15.384	43071	15	9	Female	6.2	0	0	0	6	6	1	b	Kinh doanh	Businessman	Nông dân	Farmer	Labor	52	UnderHi	Nông dân	Farmer	Labor	51	UnderHi	med	no	NA	1	b	1	3	1	0	a	NA	a	1	borrow	a	d	khát vọng sống, truyện cổ tích	yes	d	a	1	Chiến tranh và hòa bình, đắc nhân tâm, chí phèo
2751	8.142	43076	8	7	Female	6.15	0	0	0	3	3	1	b	Giáo viên	Teacher	Nông dân	Farmer	Labor	52	UnderHi	Nông dân	Farmer	Labor	54	UnderHi	med	no	NA	1	b	1	1	1	0	a	NA	a	1	borrow	a	a	Thật thà Ông già và biển cả	yes	a	a	1	Doraemon Conan Cậu bé bút chì
777	11.63	43071	11	7	Female	6.1	0	0	0	2	2	1	b	Giáo viên	Teacher	Làm ruộng	Farmer	Labor	41	Uni	Làm ruộng	Farmer	Labor	38	UnderHi	med	yes	NA	1	b	1	2	2	1	a	NA	a	1	buy	a	a	Hạt giống tâm hồn Cha tôi	yes	a	a	1	Dế mèn phiêu lưu kí 350 câu chuyện về gia đình Những cấu tạo + ngữ pháp tiếng Anh
927	11.162	43071	11	8	Female	6.1	0	0	0	2	5	1	b	Võ sư	Martial arts instructor	Nông dân	Farmer	Labor	36	UnderHi	Nông dân	Farmer	Labor	36	UnderHi	med	no	NA	1	b	1	1	2	0	b	NA	a	1	buy	d	a	Tu dưỡng đạo đức Tôn sư trọng đạo	yes	b	a	1	Sự tích con khỉ Sự tích con muỗi Quả bầu tiên
938	11.54	43071	11	6	Female	6.1	0	0	0	1	2	1	b	Bác sĩ	Doctor	Thợ xây	Worker	Labor	32	UnderHi	Công nhân	Worker	Labor	31	UnderHi	rich	no	NA	1	a	0	1	1	0	d	NA	a	1	buy	a	b	Thám tử lừng danh Conan Doraemon	yes	d	a	1	Tấm Cám Nhổ củ cải Cây tre trăm đốt
1212	1.17	43077	1	6	Male	6.1	0	0	0	2	2	1	d	Cơ khí	Engineer	Thợ xây	Worker	Labor	39	UnderHi	Nông dân	Farmer	Labor	37	UnderHi	med	no	NA	1	b	1	2	2	0	c	NA	a	1	buy	a	d	Những nhà phát minh vĩ đại Doraemon	yes	b	a	1	Ô Long viện Đảo hải tặc 7 viên ngọc rồng
1758	9.341	43073	9	9	Female	6.1	0	0	0	2	3	1	c	bác sĩ	Doctor	Công nhân	Worker	Labor	44	UnderHi	Công nhân	Worker	Labor	42	UnderHi	med	no	NA	1	b	1	2	2	0	b	NA	a	1	buy	d	a	Tôn sư trọng đạo Nghệ thuật ứng xử thông minh	yes	d	a	1	vũ khí dười nước Hướng tới tương lai Máy móc dưới nước
2358	8.2	43076	8	8	Female	6.1	0	0	0	1	3	1	e	Công an	Police officer	Nông dân	Farmer	Labor	42	Hi	Nông dân	Farmer	Labor	NA	Hi	med	no	NA	1	f	1	1	1	1	b	NA	a	1	borrow	d	b	Hoang mạc hoang sơ Người hi Lạp	yes	d	a	1	Con mèo dạy hải âu bay Cho tôi xin một vé đi tuổi thơ Mùa châu chấu
2771	8.105	43076	8	7	Female	6.1	0	0	0	1	3	1	b	NA	NA	Thợ xây	Worker	Labor	39	UnderHi	Nông dân	Farmer	Labor	37	Hi	med	no	NA	1	a	0	3	3	1	a	NA	a	1	borrow	d	d	55 cách để tự tin Búp hoa sen	yes	NA	a	1	Cô bé bán diêm Thiên nhiên thế giới Thế giới động vật
2793	16.259	43074	16	7	Female	6.1	0	0	0	2	2	1	c	Bán hàng	Seller	Thợ xây	Worker	Labor	36	NA	Công nhân	Worker	Labor	34	NA	med	no	NA	1	b	1	2	1	0	f	Truyện tranh	a	1	borrow	d	a	Những tấm lòng cao cả Học cho ai, để làm gì	yes	b	a	1	Nữ sinh Còn chút gì để nhớ Cô gái đến từ hôm qua
2847	16.306	43074	16	7	Male	6.1	0	0	0	1	2	1	b	Công an	Police officer	Nông dân	Farmer	Labor	38	UnderHi	Nông dân	Farmer	Labor	35	UnderHi	med	no	NA	1	a	0	1	1	0	a	NA	a	1	borrow	d	a	Sự tích cây khế Tình cha	yes	d	a	1	Doraemon Conan 7 viên ngọc rồng
2999	8.02	43076	8	6	Male	6.1	0	0	0	2	2	1	f	Cảnh sát	Police officer	Cán bộ huyện	Public servant	Intellectuals	45	Uni	Buôn bán	Seller	Labor	42	Hi	med	yes	NA	1	f	1	2	1	NA	e	NA	a	1	buy	a	a	Tý Quậy Conan	yes	b	a	1	Harry Potter Conan Tý quậy
3102	16.435	43074	16	8	Male	6.1	0	0	0	4	4	0	NA	Kĩ thuật	Engineer	Nông dân	Farmer	Labor	60	UnderHi	Nông dân	Farmer	Labor	49	Hi	med	no	NA	0	e	1	1	1	0	c	NA	a	1	borrow	a	c	Những điều lí thú Totochan bên cửa sổ	yes	d	a	1	Truyện tranh Truyện sự tích Sách báo
4165	3.237	43071	6	6	Female	6.1	0	0	0	1	3	1	c	Tiếp viên hàng không	Flight attendant	Nông dân	Farmer	Labor	37	Hi	Giáo viên	Teacher	Intellectuals	35	Uni	med	no	NA	1	a	0	3	2	1	d	NA	a	1	borrow	a	a	Kĩ năng sống dành cho học sinh Để luôn đạt điểm 10	yes	b	a	1	Học tiếng Anh từ a đến z Từ điển Anh Việt Cậu bé bút chì
39	30	43075	2	8	Male	6	0	0	0	1	2	1	f	Công an	Police officer	Làm thợ	Worker	Labor	NA	Hi	làm thợ	Worker	Labor	39	Hi	med	no	NA	1	a	0	1	2	0	e	NA	a	1	buy	b	b	Khám phá thế giới Hướng dẫn nghề ô tô	yes	d	a	1	Khám phá đại dương Tý quậy Dế mèn phưu lưu ký
56	38	43075	2	8	Male	6	0	0	0	1	2	1	b	công nhân	Worker	Công nhân	Worker	Labor	38	Hi	Công nhân	Worker	Labor	36	Hi	med	no	NA	1	b	1	1	1	0	a	NA	a	1	buy	a	b	Đô Rê Mon Cô nan	yes	b	a	1	Truyện cổ tích Truyện cười Câu đố
68	6.206		3	9	Male	6	0	0	0	1	2	1	b	Công an	Police officer	Làm ruộng	Farmer	Labor	41	UnderHi	Làm ruộng	Farmer	Labor	36	UnderHi	med	no	NA	1	c	1	2	2	0	a	NA	a	1	borrow	b	a	Truyện ngụ ngôn Chủ đề văn học	yes	d	a	1	Thần đồng Việt Nam Ca dao tục ngữ Triết lý văn học
84	6.223	43074	3	9	Female	6	0	0	0	2	3	1	c	Phiên dịch	Interpreter	Công nhân	Worker	Labor	45	UnderHi	Làm ruộng	Farmer	Labor	42	UnderHi	rich	no	NA	1	a	0	2	1	NA	b	NA	a	1	buy	a	a	Đừng bao giờ đi ăn một mình (Never Eat Alone) Bí quyết trưởng thành	yes	a	a	1	Rừng Na Uy Nhà giả kim Nữ thám tử Nancy Drew không dấu vết
93	41	43106	2	8	Female	6	0	0	0	1	3	1	d	công nhân	Worker	Thợ xây	Worker	Labor	37	UnderHi	Công nhân	Worker	Labor	34	UnderHi	med	no	NA	1	a	0	1	1	0	a	NA	a	1	borrow	b	b	Cô nan Đô Rê Mon	yes	b	a	1	Truyện cổ tích Nghìn lẻ một đêm Truyện cười
163	146	43114	3	8	Male	6	0	0	0	2	2	0	a	Đầu bếp	Chef	Công nhân	Worker	Labor	42	UnderHi	Công nhân	Worker	Labor	33	NA	med	no	NA	1	b	1	3	2	0	a	NA	a	1	buy	a	a	Sách nấu ăn Conan	no	b	a	1	Đất nước Cây đài giữa trời Tí quậy
164	147	43104	3	8	Female	6	0	0	0	1	2	1	d	Đầu bếp	Chef	Làm ruộng	Farmer	Labor	60	UnderHi	Làm ruộng	Farmer	Labor	56	UnderHi	med	no	NA	1	d	1	2	1	0	a	NA	a	1	borrow	a	a	Kỹ thuật về nấu ăn Kỹ năng về may mặc	yes	d	a	1	NA
165	148	43104	3	8	Male	6	0	0	0	2	2	1	a	Công nhân	Worker	Làm ruộng	Farmer	Labor	45	UnderHi	Làm ruộng	Farmer	Labor	43	UnderHi	med	no	NA	1	b	1	1	1	0	a	NA	a	1	borrow	a	c	Tí quậy Doraemon	yes	b	a	1	Conan Sách đấu vật Công chúa Ori
334	4.216	43075	2	7	Female	6	0	0	0	2	3	1	b	đầu bếp	Chef	Làm thợ	Worker	Labor	42	UnderHi	Công nhân	Worker	Labor	42	UnderHi	med	no	NA	1	b	1	1	1	0	a	NA	a	1	borrow	a	d	Đô rê mon cậu bé bút chì	yes	b	a	1	TRuyện cười Việt Nam hai vạn dặm dưới biển Ha ri póc tơ
416	4.298	43075	2	9	Male	6	0	0	0	2	2	1	a	làm thợ sửa chữa nhỏ	Worker	Làm thợ	Worker	Labor	43	UnderHi	Công nhân	Worker	Labor	40	UnderHi	med	no	NA	1	b	1	1	1	0	e	NA	a	1	buy	d	d	Truyện cổ tích	yes	d	a	1	Nhật ký trong tù Dế mèn phiêu lưu ký
591	11.177	43071	11	8	Female	6	0	0	0	1	3	1	b	Giáo viên	Teacher	làm ruộng	Farmer	Labor	40	UnderHi	làm ruộng	Farmer	Labor	36	UnderHi	med	no	NA	1	a	0	1	2	0	a	NA	a	1	borrow	d	b	Bài ca Trái Đất Tráng sĩ Cao Thắng	yes	a	a	1	Tấm Cám Truyện cổ tích Danh nhân đất Việt
842	9.142	43073	9	7	Female	6	0	0	0	2	3	1	b	diễn viên	Actor	làm ruộng	Farmer	Labor	42	UnderHi	Công nhân	Worker	Labor	39	UnderHi	med	no	NA	1	a	0	2	2	NA	e	NA	a	1	borrow	b	a	Mẹ sẽ không lạnh nữa Gió lạnh đầu mùa	yes	a	a	1	Thuyền trưởng đơn vị Việt nam sơ lược Cánh buồm đỏ thắm
1005	14.78	43071	14	7	Female	6	0	0	0	3	3	1	f	Công nghệ thông tin	Engineer	Tự do	Freelancer	Labor	55	UnderHi	Tự do	Freelancer	Labor	54	Hi	med	no	NA	1	a	0	2	2	1	c	NA	a	1	borrow	a	b	Hạt giống tâm hồn Vượt lên số phận	yes	d	a	1	1 triệu câu hỏi vì sao Để có một tâm hồn đẹp Phát minh của các thiên tài
1036	9.167	43073	9	7	Female	6	0	0	0	3	6	1	c	chưa xác định	NA	làm ruộng	Farmer	Labor	45	Hi	Làm ruộng	Farmer	Labor	41	Hi	med	no	NA	1	b	1	1	1	1	a	NA	a	1	borrow	a	b	Lược sử nước Việt bằng tranh Tư duy như một triết gia	yes	d	a	1	Conan Đô rê mon Quà tặng tinh thần cuộc sống
1062	14.96	43071	14	8	Female	6	0	0	0	1	3	1	b	Công an	Police officer	Nông dân	Farmer	Labor	40	UnderHi	Nông dân	Farmer	Labor	38	UnderHi	med	no	NA	1	a	0	1	1	1	c	NA	a	1	borrow	a	a	Quà tặng cuộc sống Chúc một ngày tốt lành	yes	a	a	1	Thám tử lừng danh Conan Doraemon Tiểu thuyết
1121	14.155	43071	14	9	Male	6	0	0	0	2	2	0	e	Tự do	Freelancer	Tự do	Freelancer	Labor	45	Hi	Công nhân	Worker	Labor	44	Hi	med	no	NA	1	b	1	1	1	0	e	NA	a	1	borrow	a	d	Thủy hử Nanh trắng	yes	c	a	1	Truyện Kiều Bản án chế độ thực dân Pháp Sự im lặng của bầy cừu
1262	01.125-1	43077	1	8	Male	6	0	0	0	1	3	1	f	Thợ máy nông nghiệp	Engineer	Thợ mộc	Worker	Labor	33	UnderHi	Công nhân	Worker	Labor	31	UnderHi	med	no	NA	1	b	1	1	1	1	c	NA	a	1	buy	c	d	Pokemon Doraemon	yes	d	a	1	Truyện Kiều Trạng Quỳnh Cậu bé bút chì
1820	2.248	43076	4	8	NA	6	0	0	0	2	3	1	f	Lái máy móc	Engineer	Thợ xây	Worker	Labor	35	UnderHi	Phụ hồ	Worker	Labor	34	UnderHi	med	no	NA	1	a	0	2	2	0	e	NA	a	1	buy	a	a	Hướng dẫn nghề Tự nhiên xã hội	yes	a	a	1	Doraemon Cậu bé bút chì Khát vọng miền xa
1884	2.22	43076	4	8	Female	6	0	0	0	1	2	1	e	Bác sĩ thú ý	Vet	Tự do	Freelancer	Labor	34	UnderHi	Tự do	Freelancer	Labor	34	UnderHi	med	no	NA	1	b	1	2	2	0	a	NA	a	1	borrow	d	a	Tìm số thất lạc Danh ngôn cuộc sống	yes	a	a	1	Những gương mặt dấn thân vì cộng đồng Danh ngôn đạo đức Kỹ năng giao tiếp ứng xử
2071	2.66	43076	4	6	Female	6	0	0	0	1	2	1	c	Hướng dẫn viên du lịch	Tour guide	Công Nhân	Worker	Labor	35	Hi	Công nhân	Worker	Labor	33	UnderHi	med	no	NA	1	b	1	2	1	0	e	NA	a	1	buy	a	a	Thám tử lừng danh Co nan Faiytail - Hội pháp sư	yes	a	a	1	Thám tử lừng danh Co nan Cậu bé bút chì Faiytail - Hội pháp sư
2073	2.64	43076	4	6	Male	6	0	0	0	3	3	1	e	Bộ đội	Soldier	Nông dân	Farmer	Labor	48	Hi	Nông dân	Farmer	Labor	44	Hi	med	no	NA	1	b	1	2	2	0	d	NA	a	1	buy	a	d	Ma Văn Kháng Những điều kì lạ	yes	a	a	1	Thám tử lừng danh Co nan Em bé thông minh Sự tích Hồ Gươm
2076	2.61	43076	4	6	Male	6	0	0	0	1	2	1	d	Nhà Khoa học	Scientist	Công Nhân	Worker	Labor	35	UnderHi	Công nhân	Worker	Labor	29	UnderHi	med	no	NA	1	f	1	2	2	0	c	NA	a	1	borrow	c	a	Năng lượng Vũ khí chiến tranh	yes	c	a	1	Cậu bé bút chì Na ru to Onepicer
2084	2.51	43076	4	6	Female	6	0	0	0	1	3	1	b	Giáo viên	Teacher	Thợ xây	Worker	Labor	35	UnderHi	Công nhân	Worker	Labor	32	Hi	med	no	NA	0	a	0	1	1	0	a	NA	a	1	borrow	d	a	Tình cha ấm áp	yes	d	a	1	Hoàng tử bé Kĩ năng sống Khám phá đại dương
2099	2.34	43076	4	6	Male	6	0	0	0	3	3	1	NA	Giáo sư	Scientist	Thợ xây	Worker	Labor	41	NA	Thợ may	Worker	Labor	41	NA	rich	no	NA	1	a	0	2	2	1	c	NA	a	1	gift	b	a	Tin học Phổ biến khoa học	yes	a	a	1	Phổ biến khoa học Sách về những nhà khoa học nổi tiếng Thông minh và hiểu biết hơn về khoa học
2106	2.172	43076	4	7	Male	6	0	0	0	1	2	1	b	Cầu thủ bóng đá	Footballer	Nông dân	Farmer	Labor	37	NA	Công nhân	Worker	Labor	36	UnderHi	poor	no	NA	1	b	1	2	3	1	e	NA	a	1	gift	b	a	Lịch sử Việt nam Đừng bao giờ từ bỏ khát vọng	yes	d	a	1	Doraemon conan
2108	2.29	43076	4	6	Female	6	0	0	0	1	3	1	b	Giáo viên	Teacher	Thợ xây	Worker	Labor	34	Hi	Công nhân	Worker	Labor	32	Hi	med	no	NA	1	a	0	1	NA	1	a	NA	a	1	borrow	d	NA	Xao xuyến tuổi học trò	yes	d	a	1	Kĩ năng sống Lịch sử Việt Nam Hoàng tử bé
2114	2.165	43076	4	7	Male	6	0	0	0	1	2	1	b	Cảnh sát cơ động	Police officer	Nông dân	Farmer	Labor	39	UnderHi	Nông dân	Farmer	Labor	33	UnderHi	med	no	NA	1	b	1	1	1	1	d	NA	a	1	borrow	a	c	Lịch sử Việt Nam Đừng bao giờ từ bỏ khát vọng	yes	d	a	1	Sách tiếng Anh Sách võ thuật Sách kĩ thuật bóng đá
2120	2.159	43076	4	7	Male	6	0	0	0	1	2	1	e	Bộ đội	Soldier	Nông dân	Farmer	Labor	43	Hi	Nông dân	Farmer	Labor	38	UnderHi	med	no	NA	1	e	1	1	1	0	c	NA	a	1	borrow	NA	c	Doraemon 7viên ngọc rồng	yes	a	a	1	Thời niên thiếu của các thiên tài Tý Quậy Cậu bé bút chì
2123	2.156	43076	4	7	Male	6	0	0	0	1	2	1	e	Công an	Police officer	Nông dân	Farmer	Labor	38	UnderHi	Nông dân	Farmer	Labor	34	UnderHi	med	no	NA	1	b	1	1	1	0	f	Lịch sử Việt Nam	a	1	borrow	a	a	Lịch sử việt Nam Khoa học	yes	b	a	1	NA
2124	2.155	43076	4	7	Male	6	0	0	0	2	2	1	c	Công an	Police officer	Thợ xây	Worker	Labor	39	UnderHi	Nông dân	Farmer	Labor	41	UnderHi	med	NA	NA	NA	c	1	3	2	0	a	NA	a	1	borrow	b	a	Kĩ năng sống dành cho học sinh Tình yêu không bằng lời nói	yes	d	a	1	Doraemon Naruto Conan
2131	2.148	43076	4	7	Male	6	0	0	0	5	3	1	e	Công an	Police officer	Nông dân	Farmer	Labor	51	UnderHi	Nông dân	Farmer	Labor	48	UnderHi	med	no	NA	1	a	0	2	2	0	a	NA	a	1	buy	a	a	Lịch sử Việt nam Hạt giống tâm hồn	yes	a	a	1	Quà tặng cuộc sống Tiếng gọi nơi hoang dã Kĩ năng sống
2150	2.129	43076	4	7	NA	6	0	0	0	1	3	1	e	Làm đẹp	Makeup artist	NA	NA	NA	NA	NA	Công nhân	Worker	Labor	36	Hi	med	no	NA	1	NA	1	2	2	1	e	NA	a	1	buy	d	a	Học cho ai, học về làm gì Vượt lên số phận	yes	a	a	1	Ra vườn nhặt nắng Công chúa ngủ trong rừng Cậu bé bút chì
2151	2.128	43076	4	7	Male	6	0	0	0	1	2	0	b	Thợ xây	Worker	Thợ xây	Worker	Labor	36	UnderHi	Phụ hồ	Worker	Labor	34	Hi	med	no	NA	1	b	1	2	1	0	a	NA	a	1	borrow	a	c	Hạt giống tâm hồn Chìa khóa vàng	yes	b	a	1	NA
2226	8.277	43076	8	8	NA	6	0	0	0	1	4	1	d	Đầu bếp	Chef	Cơ khí	Engineer	Labor	36	Hi	Công nhân	Worker	Labor	35	Hi	med	no	NA	1	b	1	1	1	0	c	NA	a	1	borrow	a	d	Tự nhiên xã hội Khám phá tự nhiên	no	d	a	1	Văn học truyện tranh Lịch sử Việt nam
2750	8.141	43076	8	7	Male	6	0	0	0	1	2	1	b	Lái máy xúc	Driver	Nông dân	Farmer	Labor	38	UnderHi	Nông dân	Farmer	Labor	32	UnderHi	med	no	NA	1	b	1	1	1	0	a	NA	a	1	borrow	a	d	Thánh Gióng Con Rồng Cháu tiên	yes	a	a	1	Cậu bé bút chì Doraemon Conan
2760	8.94	43076	8	7	Male	6	0	0	0	4	3	1	b	Cảnh sát	Police officer	Thợ xây	Worker	Labor	50	UnderHi	Nông dân	Farmer	Labor	51	UnderHi	med	no	NA	1	a	0	2	1	1	e	NA	a	1	buy	a	a	Chắp cánh ước mơ Búp sen xanh	yes	d	a	1	Thiên nhien Cây tre trăm đốt Tấm Cám
2761	8.95	43076	8	7	Female	6	0	0	0	2	2	1	b	NA	NA	Không xác định	NA	NA	40	UnderHi	Nông dân	Farmer	Labor	45	Hi	rich	no	NA	1	b	1	3	3	1	b	NA	a	1	borrow	a	a	55 cách tự tin Tình cha	yes	b	a	1	Tấm Cám 12 hạt giống tâm hồn Cây tre trăm đốt
2768	8.102	43076	8	7	Male	6	0	0	0	2	1	1	d	Công an	Police officer	Thợ xây	Worker	Labor	39	UnderHi	Không xác định	NA	Labor	35	UnderHi	rich	no	NA	1	b	1	1	2	0	c	NA	a	1	borrow	a	a	Hạt giống tâm hồn Phòng tránh tai nạn nơi công cộng	yes	b	a	1	Truyện về cuộc sống
2783	8.117	43076	8	7	Male	6	0	0	0	1	0	1	f	Nhà Khoa học	Scientist	Tài xế	Driver	Labor	37	UnderHi	Tự do	Freelancer	Labor	NA	UnderHi	rich	no	NA	1	b	1	3	1	1	c	NA	a	1	borrow	a	a	Đời sống khoa học Hạt giống tâm hồn	yes	d	a	1	Dragon ball conan Doraemon
2803	16.269	43074	16	7	Female	6	0	0	0	3	3	1	d	Nhân viên	Employee	Thợ xây	Worker	Labor	44	UnderHi	Nông dân	Farmer	Labor	42	UnderHi	rich	no	NA	1	b	1	1	1	0	a	NA	a	1	borrow	a	d	A Cư và những người bạn Học để làm gì	yes	c	a	1	Tắt đèn Dế Mèn phiêu lưu kí Truyện cổ tích
2827	16.289	43074	16	7	Female	6	0	0	0	1	3	1	b	Bác sĩ	Doctor	Nông dân	Farmer	Labor	34	UnderHi	Nông dân	Farmer	Labor	32	UnderHi	med	no	NA	1	a	0	2	1	0	a	NA	a	1	borrow	d	b	55 cách để tự tin Giáo dục nhân cách	yes	a	a	1	Cách làm người Tình cha Tình cha ấm áp
2849	16.308	43074	16	7	Female	6	0	0	0	4	6	1	b	Bác sĩ	Doctor	Nông dân	Farmer	Labor	46	UnderHi	Nông dân	Farmer	Labor	44	UnderHi	med	no	NA	1	c	1	2	1	0	a	NA	a	1	borrow	d	b	Học cách làm người tử tế tình mẹ	yes	b	a	1	Shin Doraemon Những câu chuyện về tình cảm gia đình
2854	16.313	43074	16	7	Male	6	0	0	0	2	2	1	d	Nghệ sĩ	Artist	Nông dân	Farmer	Labor	40	UnderHi	Nông dân	Farmer	Labor	38	UnderHi	med	no	NA	1	b	1	1	1	0	d	NA	a	1	borrow	d	a	Kiên trì Thánh gióng	yes	b	a	1	Đảo hải tặc 7 viên ngọc rồng Thần đồng đất Việt
2920	16.369	43075	16	8	Female	6	0	0	0	2	2	1	d	Thiết kế thời trang	Fashion designer	Nông dân	Farmer	Labor	43	UnderHi	Nông dân	Farmer	Labor	43	UnderHi	med	no	NA	1	c	1	2	1	NA	a	NA	a	1	buy	a	a	Khoa học vật lý Kỹ năng sống	yes	d	a	1	Sách danh nhân Truyện văn học Khoa học kỹ thuật
2980	8.45	43076	8	6	Male	6	0	0	0	1	2	1	e	Bộ Đội	Soldier	Công Nhân	Worker	Labor	35	UnderHi	Nông dân	Farmer	Labor	33	UnderHi	med	no	NA	1	e	1	2	1	0	b	NA	a	1	gift	b	b	Conan Doraemon	yes	a	a	1	Dragon ball Cậu bé bút chì Doraemon
2993	8.58	43076	8	6	Male	6	0	0	0	3	3	1	e	Ca sĩ	Singer	Thợ xây	Worker	Labor	47	Hi	Công nhân	Worker	Labor	43	UnderHi	rich	NA	NA	1	d	1	1	1	0	a	NA	a	1	borrow	a	c	Doraemon Dragon ball	yes	d	a	1	Quê nội Bác Hồ Lịch sử
3109	16.442	43074	16	8	Female	6	0	0	0	1	3	NA	c	Bác sĩ	Doctor	Thợ xây	Worker	Labor	38	UnderHi	Công nhân	Worker	Labor	35	Hi	med	no	NA	1	c	1	1	NA	0	f	Truyện cổ tích	a	1	borrow	a	NA	Doraemon Conan	no	a	a	1	12 cung hoàng đạo Conan Chìa khóa vàng vật lý
3167	15.72	43071	15	6	Male	6	0	0	0	1	4	1	e	Bộ đội	Soldier	Công nhân	Worker	Labor	40	Hi	Nông dân	Farmer	Labor	35	Hi	med	no	NA	1	c	1	1	1	0	f	truyện tranh	a	1	borrow	b	b	hạt giống tâm hồn, doraemon	yes	a	a	1	NA
3175	16.477	43074	16	8	Female	6	0	0	0	1	3	1	c	Nhà khoa học	Scientist	Nông dân	Farmer	Labor	35	NA	Nông dân	Farmer	Labor	NA	UnderHi	med	no	NA	0	c	1	2	2	NA	c	NA	a	1	borrow	a	b	Để nói thông thạo tiếng anh Truyện cổ tích	NA	c	a	1	Thế giới bí mật của Ari Ate 10 vạn câu hỏi vì sao The lost Shoe
3178	16.48	43074	16	8	Male	6	0	0	0	5	5	1	d	Diễn viên	Actor	Nông dân	Farmer	Labor	66	Hi	Nông dân	Farmer	Labor	65	Hi	rich	no	NA	1	b	1	3	3	1	c	NA	a	1	borrow	d	a	Chìa khóa vàng Lịch sử Việt Nam	yes	b	a	1	Hành trình tới sao hỏa Conan Những điều lí thú về thiên nhiên khoa học
3226	16.482	43074	16	8	Male	6	0	0	0	1	2	1	b	hacker	Hacker	thợ xây	Worker	Labor	45	UnderHi	công nhân	Worker	Labor	45	Hi	med	no	NA	1	a	0	2	2	0	b	NA	a	1	borrow	a	d	danh nhân thế giới tiếng gọi nơi hoang dã	yes	b	a	1	toán học diệu kì 100 truyện cổ tích thế giới thiên nhiên hoang dã
3228	16.484	43074	16	8	Female	6	0	0	0	1	3	1	e	giáo viên	Teacher	xây dựng	Worker	Labor	35	Hi	nông dân	Farmer	Labor	32	Hi	rich	no	NA	0	c	1	1	1	1	a	NA	a	1	borrow	a	a	hạt gióng tâm hồn danh nhân thế giới	yes	a	a	1	cách học giỏi tiếng anh ma văn kháng mùa lạc vũ tú nam truyện ngắn
3235	16.489	43074	16	8	Female	6	0	0	0	1	2	1	b	giáo viên	Teacher	thợ xây	Worker	Labor	40	UnderHi	tự do	Freelancer	Labor	39	Hi	med	no	NA	1	a	0	1	1	NA	a	NA	a	1	buy	d	d	truyện thép đã tôi thế đấy tôi muốn biết ở đâu	yes	c	a	1	truyện cổ tích danh ngôn đố vui
3258	3.34	43071	6	9	Female	6	0	0	0	3	3	1	f	Bộ đội	Soldier	Nông dân	Farmer	Labor	49	UnderHi	Công nhân	Worker	Labor	NA	Hi	med	no	NA	0	b	1	2	NA	0	f	Truyện tranh	a	1	buy	a	NA	Conan Doraemon	no	a	a	1	Nhật kí cậu bé nhút nhát Hạt giống tâm hồn Dôraemon
3299	16.531	43074	16	9	Female	6	0	0	0	1	2	1	b	bộ đội	Soldier	nông dân	Farmer	Labor	35	Hi	nông dân	Farmer	Labor	33	Hi	med	yes	NA	1	a	0	3	2	0	f	tiểu thuyết	a	1	buy	d	a	thúy kiều tonny buổi sáng	yes	a	a	1	truyện hay về bác hồ truyện tiểu thuyết truyền thuyết
3345	16.569	43074	16	9	Male	6	0	0	0	2	2	0	a	chủ tịch nước	Politician	nông dân	Farmer	Labor	42	UnderHi	nông dân	Farmer	Labor	37	UnderHi	med	no	NA	1	b	1	2	1	NA	a	NA	a	1	buy	a	a	hướng dẫn nghề khoa học thông tin	yes	d	a	1	hướng dẫn nghề khoa học thông tin sách nội trợ
3372	16.577	43074	16	9	Male	6	0	0	0	0	0	1	f	bác sĩ	Doctor	nông dân	Farmer	Labor	50	Hi	nông dân	Farmer	Labor	48	Hi	med	no	NA	1	f	1	2	1	0	d	NA	a	1	NA	d	a	tráng sĩ cao thắng 10 vị hoàng đế việt nam	yes	a	a	1	3 người thầy vĩ đại 10 vạn câu hỏi vì sao hạt giống tâm hồn
3374	16.578	43074	16	9	Female	6	0	0	0	3	4	1	b	giáo viên	Teacher	nông dân	Farmer	Labor	45	UnderHi	nông dân	Farmer	Labor	45	UnderHi	med	no	NA	1	f	1	2	2	0	d	NA	a	1	buy	b	c	tắt đèn lịch sử việt nam	yes	a	a	1	các văn học nổi tiếng trên thế giới sách dạy tiếng anh sách dạy nghề
3392	16.81	43074	16	6	Male	6	0	0	0	3	2	1	a	công an	Police officer	xây dựng	Worker	Labor	43	Hi	đan	Worker	Labor	41	UnderHi	med	no	NA	0	b	1	1	1	0	a	NA	a	1	buy	a	c	doremon bí mật tự nhiên vũ trụ	yes	d	a	1	conan 7 viên ngọc rồng
3411	16.95	43074	16	6	Female	6	0	0	0	1	2	1	b	buôn bán	Seller	buôn bán	Seller	Labor	NA	UnderHi	buôn bán	Seller	Labor	NA	UnderHi	med	no	NA	1	b	1	1	1	0	a	NA	a	1	buy	d	c	tự nhiên vũ trụ bóng bay gửi thư	yes	NA	a	1	khoa học tự nhiên vũ trụ pháp sư tài ba
3413	16.96	43074	16	6	Male	6	0	0	0	1	2	1	NA	công an	Police officer	xây dựng	Worker	Labor	37	Hi	làm ruộng	Farmer	Labor	38	Hi	med	no	NA	1	a	0	1	1	0	a	NA	a	1	buy	a	d	tự nhiên vũ trụ truyện ngày xưa	no	NA	a	1	những phát minh khoa học cách chế tạo đồ chơi thô xơ khám phá sao hỏa
3470	3.77	43071	6	9	Male	6	0	0	0	3	4	1	d	Phi công	Pilot	Chăn nuôi	Herder	Labor	47	UnderHi	Chăn nuôi	Herder	Labor	46	UnderHi	med	no	NA	1	f	1	2	2	1	e	NA	a	1	borrow	a	a	Khoa học đời sống Nghệ thuật ứng xử thông minh	yes	d	a	1	Nghệ thuật nắm bắt cơ hội tùy cơ ứng biến Bí ẩn tự nhiên vũ trụ Động vật thực vật
3556	3.118	43071	6	8	Female	6	0	0	0	1	3	1	b	Công nhân	Worker	Nông dân	Farmer	Labor	41	Hi	Công nhân	Worker	Labor	35	UnderHi	med	no	NA	1	b	1	1	1	0	a	NA	a	1	borrow	b	a	Thiên hà thật đáng ngạc nhiên Học sinh thanh lịch	yes	a	a	1	Vật lý lí thú Dám tha thứ Sinh vật lí thú
3721	16.123	43074	16	6	Female	6	0	0	0	3	3	1	d	bác sĩ	Doctor	thợ xây	Worker	Labor	54	NA	làm ruộng	Farmer	Labor	50	Hi	rich	yes	20000000	1	NA	1	2	2	0	c	NA	a	1	buy	d	b	kiến thức thực vật giáo dục tâm hồn trẻ dạy trẻ có chí tiến thủ	yes	a	a	1	khám phá khoa học về tấm gương đạo đức HCM giáo dục tâm hồn dạy trẻ có trái tim yêu thương
3793	16.129	43074	16	6	Male	6	0	0	0	1	3	1	d	họa sĩ	Painter	thợ xây	Worker	Labor	35	UnderHi	nông dân	Farmer	Labor	34	UnderHi	med	no	NA	1	b	1	1	1	0	d	NA	a	1	buy	a	a	động vật biển khám phá vũ trụ	yes	d	a	1	khám phá rừng khám phá vũ trụ động vật biển
3795	16.131	43074	16	6	Male	6	0	0	0	2	2	1	f	sáng chế	Inventor	thợ xây	Worker	Labor	48	Hi	thợ may	Worker	Labor	NA	UnderHi	rich	no	NA	1	b	1	2	2	1	c	NA	a	1	buy	c	a	động vật biển khám phá rừng	yes	c	a	1	doraemon conan vua khổng tước
4017	10.12	43074	5	6	Female	6	0	0	0	3	3	1	b	công ti	Businessman	không xác định	NA	NA	NA	NA	nông dân	Farmer	Labor	43	UnderHi	poor	no	NA	0	b	1	2	2	0	e	NA	a	1	borrow	a	c	khám phá rừng thế giới động vật	no	NA	a	1	phạm hổ tấm cám bạch tuyết
4123	10.201	43075	5	7	Male	6	0	0	0	1	2	1	d	công an	Police officer	công nhân	Worker	Labor	37	NA	công nhân	Worker	Labor	32	NA	rich	no	NA	1	a	0	1	1	1	d	NA	a	1	buy	d	b	thật thà ông già và biển cả	yes	d	a	1	thế giới động vật truyện cổ tích chú bé rắc rối
4126	15.23	43071	15	8	Male	6	0	0	0	6	6	1	d	công an	Police officer	Nông dân	Farmer	Labor	51	UnderHi	Nông dân	Farmer	Labor	50	UnderHi	med	no	4000000	1	b	1	1	1	0	c	NA	a	1	borrow	a	b	Ngô Quyền,Cuốn sách nhân dân Việt nam	no	b	a	1	Chú cuội cung trăng, Chuyện thánh gióng, Doraemon
4128	15.232	43071	15	8	Female	6	0	0	0	2	3	1	e	NA	NA	Nông dân	Farmer	Labor	43	UnderHi	Nông dân	Farmer	Labor	36	UnderHi	med	no	NA	1	a	0	2	NA	0	a	NA	a	1	borrow	a	b	Học ăn, học nói, học gói, học mở; Truyện cổ tích Việt Nam	no	b	a	1	Truyện Kiều, Giữ vệ sinh môi trường,Hạt giống tâm hồn
4240	10.243		5	7	Female	6	0	0	0	1	2	1	c	ca sĩ	Singer	tự do	Freelancer	Labor	52	UnderHi	công nhân	Worker	Labor	37	UnderHi	med	yes	4000000	1	b	1	2	1	0	a	NA	a	1	buy	a	b	túp lều của tôm bàn có 5 chỗ ngồi	yes	d	a	1	trần hoài dương tô hoài quà tặng tặng quà
4248	10.251		5	7	Male	6	0	0	0	3	3	NA	d	cảnh sát	Police officer	nông dân	Farmer	Labor	45	UnderHi	nông dân	Farmer	Labor	44	UnderHi	med	NA	NA	1	b	1	1	1	0	b	NA	a	1	borrow	d	a	túp lều của bác tom vật lý lý thú	yes	c	a	1	túp lều của bác tôm vật lý lý thú khoa học lý thú
4260	15.263		5	7	Male	6	0	0	0	4	4	1	b	không xác định	NA	nông dân	Farmer	Labor	55	NA	nông dân	Farmer	Labor	45	NA	med	NA	5000000	1	b	1	1	1	0	e	NA	a	1	buy	a	a	túp lều bác tom mẹ tôi	yes	d	a	1	doraemon naruto peritheo
4300	10.303	43074	5	8	Male	6	0	0	0	5	3	1	b	đầu bếp	Chef	nông dân	Farmer	Labor	48	NA	nông dân	Farmer	Labor	49	NA	med	no	NA	1	c	1	1	1	1	f	khác	a	1	buy	a	a	NA	NA	a	a	1	NA
4301	10.304	43074	5	8	Female	6	0	0	0	3	4	NA	b	giáo viên	Teacher	nông dân	Farmer	Labor	56	NA	nông dân	Farmer	Labor	46	NA	NA	no	NA	0	b	1	2	1	0	a	NA	a	1	borrow	b	b	tình yêu bất tận của người mẹ bụi phấn	yes	b	a	1	phòng tránh tệ nạn xã hội
4328	3.287	43071	6	6	Male	6	0	0	0	2	3	1	a	Giám đốc	Director	Thợ xây	Worker	Labor	41	Hi	Công nhân	Worker	Labor	37	Hi	med	no	NA	1	a	0	2	NA	0	a	NA	a	1	borrow	a	a	Doraemon Toán học	yes	b	a	1	Toán học Văn học Dragon ball
4370	10.335	43074	5	8	Male	6	0	0	0	4	4	1	d	cầu thủ bóng đá	Footballer	xây dựng	Worker	Labor	51	Uni	nông dân	Farmer	Labor	46	Hi	med	no	NA	0	b	1	2	1	1	d	NA	a	1	borrow	a	d	kĩ thuật bóng rổ vũ khí chiến tranh	yes	a	a	1	bóng mát tâm hồn ngữ pháp tiếng anh bí mật toán
4377	10.342	43074	5	8	Male	6	0	0	0	2	3	1	d	công an	Police officer	xây dựng	Worker	Labor	42	UnderHi	công nhân	Worker	Labor	38	UnderHi	rich	yes	NA	1	c	1	1	1	0	d	NA	a	1	borrow	c	d	học ăn học nói học gói học mở kì quan thiên nhiên	yes	b	a	1	NA
4383	10.348	43074	5	8	Female	6	0	0	0	1	2	1	d	bộ đội	Soldier	nông dân	Farmer	Labor	34	Hi	công nhân	Worker	Labor	NA	Hi	med	yes	NA	0	a	0	1	1	0	a	NA	a	1	borrow	c	d	3 ngày ở vương quốc tí hon ngữ pháp tiếng anh	yes	d	a	1	thời tiết như bão tố mỗi ngày nên chọn 1 niềm vui dế mèn phưu lưu kí
4520	10.429	43074	5	9	Male	6	0	0	0	1	3	1	b	không xác định	NA	nông dân	Farmer	Labor	34	UnderHi	nông dân	Farmer	Labor	33	Hi	med	no	NA	1	f	1	2	2	0	a	NA	a	1	borrow	d	a	khoa học kĩ thuật kiên trì	yes	a	a	1	con ngạn truuện kiều thiên nhiên hoang dã
4557	10.443	43074	5	9	Female	6	0	0	0	5	6	1	d	công an	Police officer	nông dân	Farmer	Labor	52	UnderHi	nông dân	Farmer	Labor	47	UnderHi	poor	no	NA	1	c	1	1	1	NA	e	NA	a	1	borrow	d	d	những cuốn chuyện viết cho thiếu nhi tình cha	yes	b	a	1	truyện liều doraemon shin
4596	15.341	43071	15	9	Male	6	0	0	0	2	2	1	a	Kỹ thuật điện	Engineer	Nông dân	Farmer	Labor	52	UnderHi	Nông dân	Farmer	Labor	47	UnderHi	med	no	NA	1	f	1	2	1	0	d	NA	a	1	borrow	d	d	Truyện Kiều, Đắc Nhân Tâm	yes	a	a	1	NA
4618	15.351	43071	15	9	Female	6	0	0	0	2	2	1	f	Cảnh sát	Police officer	lái xe	Driver	Labor	39	Hi	Nông dân	Farmer	Labor	40	UnderHi	med	NA	NA	0	f	1	1	1	0	f	truyện tranh	a	1	borrow	b	d	hãy đặt trách nhiệm lên vai, khát vọng sống	yes	a	a	1	NA
4659	15.369	43071	15	9	Male	6	0	0	0	2	2	1	f	Kinh doanh	Businessman	Thợ xây	Worker	Labor	41	UnderHi	Nông dân	Farmer	Labor	40	UnderHi	med	no	NA	1	b	1	2	1	0	f	truyện tranh	a	1	borrow	b	a	conan, doraemon	yes	b	a	1	Chiến tranh và hòa bình, đắc nhân tâm, chí phèo
4670	15.375	43071	15	9	Male	6	0	0	0	2	2	1	f	Kinh doanh	Businessman	Nông dân	Farmer	Labor	46	UnderHi	Nông dân	Farmer	Labor	43	UnderHi	med	no	NA	1	b	1	1	1	0	a	NA	a	1	borrow	d	d	Truyện cổ tích, conan	yes	d	a	1	Chiến tranh và hòa bình, đắc nhân tâm, tuyển tập Ngô Tất Tố
4672	15.376	43071	15	9	Male	6	0	0	0	2	3	1	f	Kinh doanh	Businessman	Nông dân	Farmer	Labor	50	UnderHi	Nông dân	Farmer	Labor	48	UnderHi	med	no	NA	1	f	1	2	1	0	a	NA	a	1	buy	a	d	truyện cổ tích, conan	yes	b	a	1	Chiến tranh và hòa bình, đắc nhân tâm, chí phèo
4674	15.377	43071	15	9	Male	6	0	0	0	1	1	1	e	Kinh doanh	Businessman	Nông dân	Farmer	Labor	46	Hi	Nông dân	Farmer	Labor	36	Hi	med	no	NA	1	b	1	1	1	0	a	NA	a	1	borrow	d	d	doraemon, thạch sanh	yes	b	a	1	Chiến tranh và hòa bình, tắt đèn, chí phèo
4676	15.378	43071	15	9	Male	6	0	0	0	1	2	1	e	Kinh doanh	Businessman	Nông dân	Farmer	Labor	40	Hi	Nông dân	Farmer	Labor	36	UnderHi	med	no	NA	1	b	1	1	1	0	e	NA	a	1	borrow	a	d	truyện cổ tích, lịch sử	yes	c	a	1	Chiến tranh và hòa bình, tắt đèn, chí phèo
4680	15.38	43071	15	9	Male	6	0	0	0	1	3	1	a	Kinh doanh	Businessman	Nông dân	Farmer	Labor	38	Hi	Nông dân	Farmer	Labor	35	Hi	med	no	NA	1	a	0	2	1	0	a	NA	a	1	borrow	d	d	khát vọng sống, còn chút gì để nhớ	yes	d	a	1	Chiến tranh và hòa bình, tắt đèn, chí phèo
4681	15.381	43071	15	9	Female	6	0	0	0	1	2	1	b	Giáo viên	Teacher	Nông dân	Farmer	Labor	38	Hi	Nông dân	Farmer	Labor	33	Hi	med	no	NA	1	a	0	2	2	0	a	NA	a	1	borrow	b	a	truyện cổ tích, khát vọng sống	yes	b	a	1	chiến tranh và hòa bình, Xuân Diệu đời và thơ, Chí phèo
4758	10.531		5	9	Male	6	0	0	0	2	3	NA	a	không xác định	NA	nông dân	Farmer	Labor	40	NA	công nhân	Worker	Labor	34	NA	NA	NA	5000000	1	a	0	2	2	1	e	NA	a	1	borrow	d	d	dế mèn phưu lưu kí doraemon	yes	d	a	1	sông đông êm đềm mùa hoa thuốc phiện conan
4878	10.89	43075	5	6	Male	6	0	0	0	0	0	1	f	không xác định	NA	công nhân	Worker	Labor	36	NA	công nhân	Worker	Labor	35	NA	med	yes	4000000	1	e	1	1	1	0	d	NA	a	1	borrow	b	c	ước gì mình biết được	yes	d	a	1	NA
4880	10.91	43075	5	6	Male	6	0	0	0	2	3	1	a	bác sĩ	Doctor	nông dân	Farmer	Labor	37	Hi	nông dân	Farmer	Labor	36	Hi	med	no	NA	1	b	1	1	1	0	b	NA	a	1	borrow	b	c	toán văn	yes	d	a	1	doremon shin cậu bé bút chì conan
4957	7.286	43071	7	8	Female	6	0	0	0	2	3	1	b	Công nhân	Worker	Thợ xây	Worker	Labor	45	UnderHi	Phụ hồ	Worker	Labor	45	UnderHi	rich	no	NA	1	b	1	1	1	0	b	NA	a	1	borrow	a	c	Doraemon Truyện dân gian	yes	a	a	1	Truyện dân gian
605	11.181	43071	11	8	Female	5.9	0	0	0	2	4	1	e	ca sĩ	Singer	làm ruộng	Farmer	Labor	55	NA	Công nhân	Worker	Labor	48	NA	poor	no	NA	1	c	1	3	2	0	a	NA	a	1	borrow	d	a	Hạt giống tâm hồn Mỗi ngày nên chọn một niềm vui	yes	a	a	1	Tấm Cám Truyện cổ tích Việt Nam Hướng dẫn chơi môn thể thao
902	11.96	43071	11	7	Male	5.9	0	0	0	1	2	1	f	Kĩ sư	Engineer	Nông dân	Farmer	Labor	38	UnderHi	Nông dân	Farmer	Labor	40	UnderHi	med	yes	9000000	1	a	0	2	2	0	c	NA	a	1	buy	a	a	Kĩ thuật về bóng bàn Thám tử lừng danh Conan	yes	d	a	1	10 vạn câu hỏi vì sao Lịch sử Việt Nam 10 điều tạo nên số phận
1314	1.143	43077	1	9	Male	5.9	0	0	0	1	1	1	f	Lập trình viên	Programmer	Không xác định	NA	NA	NA	NA	Công nhân	Worker	Labor	34	Uni	poor	yes	NA	0	f	1	3	3	0	b	NA	a	1	borrow	d	b	Danh nhân thế giới Hạt giống tâm hồn	yes	c	a	1	Dạy học Karate Khoa học vũ trụ Đảo hải tặc
2254	8.261	43076	8	9	Female	5.9	0	0	0	1	3	1	b	Giáo viên	Teacher	Nông dân	Farmer	Labor	41	Hi	Nông dân	Farmer	Labor	35	Hi	med	no	NA	1	f	1	2	2	0	a	NA	a	1	buy	a	a	Tình yêu bất tận của mẹ Hạt giống tâm hồn	yes	a	a	1	Tý Quậy Mãi mãi là bao xa Này chớ có làm loạn
2754	8.146	43076	8	NA	Female	5.9	0	0	0	4	4	1	b	NA	NA	NA	NA	NA	NA	NA	Nông dân	Farmer	Labor	NA	UnderHi	med	no	NA	1	b	1	1	1	0	a	NA	a	1	borrow	a	a	Cậu bé bút chì Ông già và biển cả	yes	a	a	1	Cậu bé bút chì Doraemon Conan
2795	16.261	43074	16	7	Male	5.9	0	0	0	1	3	1	d	Khoa học	Scientist	Chủ thầu	building contractors	Labor	43	UnderHi	Bán hàng	Seller	Labor	33	NA	rich	no	NA	1	a	0	2	1	0	c	NA	a	1	buy	b	a	Các nhà phát minh vĩ đại Tư duy Vật lý	yes	d	a	1	Sinh tồn trong mọi hoàn cảnh Một nghệ thuật sống Những tấm lòng cao cả
2806	16.272	43074	16	7	Female	5.9	0	0	0	2	3	1	c	Phiên dịch viên	Interpreter	Nông dân	Farmer	Labor	41	UnderHi	Nông dân	Farmer	Labor	40	UnderHi	med	no	NA	1	a	0	1	1	0	e	NA	a	1	borrow	a	b	Bác Hồ với Ninh Bình Đến với tư tưởng Hồ Chí Minh	yes	c	a	1	Bác Hồ và những tấm gương đạo đức dành cho học sinh lớp 8 Tuổi thơ dữ dội bài học lớp về trí tuệ
3371	16.576	43074	16	9	Female	5.9	0	0	0	2	3	1	d	đầu bếp	Chef	nông dân	Farmer	Labor	43	UnderHi	nông dân	Farmer	Labor	39	UnderHi	med	no	NA	1	f	1	1	1	0	e	NA	a	1	buy	a	a	lịch sử việt nam giới thiệu các tác giả văn chương việt nam	yes	a	a	1	sách dạy nấu ăn sách dạy tiếng anh các văn học nổi tiếng trên thế giới
3385	16.75	43074	16	6	Female	5.9	0	0	0	1	2	1	a	tiếp viên hàng không	Flight attendant	xây dựng	Worker	Labor	34	Hi	làm ruộng	Farmer	Labor	30	Hi	med	no	NA	1	b	1	1	1	0	e	NA	a	1	borrow	d	a	tự nhiên và vũ trụ truyện văn học	yes	d	a	1	sách hài hước truyện kì tài thiên nhiên
3398	16.86	43074	16	6	Male	5.9	0	0	0	2	2	1	b	công an giao thông	Police officer	xây dựng	Worker	Labor	45	Hi	công nhân	Worker	Labor	40	Hi	med	no	NA	1	a	0	2	2	NA	a	NA	a	1	buy	b	a	100 phát minh hạt giống tâm hồn	yes	c	a	1	chuyện văn học chuyện toán học chuyện phát minh
569	9.092	43073	9	7	Male	5.8	0	0	0	2	2	1	d	Bộ đội	Soldier	Lái xe	Driver	Labor	42	UnderHi	Bác sĩ	Doctor	Intellectuals	39	Uni	rich	no	NA	1	b	1	1	1	0	f	Truyện tranh	a	1	buy	a	a	Hướng dẫn chăm sóc gà Hướng dẫn nghề	yes	b	a	1	Thăm dò vũ trụ Hướng dẫn khi đi cắm trại sách tìm hiểu thiên nhiên
670	9.097	43073	9	7	Male	5.8	0	0	0	3	3	0	NA	Bộ đội	Soldier	làm ruộng	Farmer	Labor	45	Hi	làm ruộng	Farmer	Labor	39	UnderHi	med	no	NA	1	b	1	1	1	0	e	NA	a	1	borrow	a	a	Việt Nam sử học Hạt giống tâm hồn	yes	a	a	1	Lý Thánh Tông và Nguyên phi Ỷ Lan Cổ tích Việt Nam Danh tướng Lý thường Kiệt
2480	13.167	43075	13	7	Female	5.8	0	0	0	1	2	1	b	Họa sĩ	Painter	công nhân	Worker	Labor	38	UnderHi	làm nghề tự do	Freelancer	Labor	35	UnderHi	med	no	NA	0	f	1	2	1	0	a	NA	a	1	borrow	d	b	truyện cổ tích doraemon	yes	a	a	1	NA
2811	16.277	43074	16	7	Male	5.8	0	0	0	2	2	1	a	Vận động viên	Athlete	Nông dân	Farmer	Labor	40	UnderHi	Giáo viên	Teacher	Intellectuals	37	Uni	med	yes	NA	1	f	1	1	1	1	d	NA	a	1	buy	a	a	NA	yes	b	a	1	NA
3353	16.574	43074	16	9	Female	5.8	0	0	0	2	2	1	b	đầu bếp	Chef	nông dân	Farmer	Labor	41	UnderHi	nông dân	Farmer	Labor	40	UnderHi	med	no	NA	1	f	1	1	1	0	e	NA	a	1	buy	a	a	nghệ thuật ứng xử thông minh hạt giống tâm hồn	yes	a	a	1	sách dạy nấu ăn các văn hóa nỏi tiếng trên thế giới lịch sử chiến tranh
3417	16.589	43074	16	9	Male	5.8	0	0	0	3	3	1	f	kĩ sư	Engineer	nông dân	Farmer	Labor	45	NA	nông dân	Farmer	Labor	42	UnderHi	poor	no	NA	1	e	1	2	2	0	e	NA	a	1	buy	d	a	tắt đèn truyện ngắn vũ trọng phụng	yes	d	a	1	tráng sĩ cao thắng truyện văn học sách danh nhân
3788	13.307	43073	13	8	Male	5.8	0	0	0	2	3	0	NA	cơ khí	Engineer	nông dân	Farmer	Labor	36	UnderHi	nông dân	Farmer	Labor	NA	UnderHi	NA	no	NA	1	f	1	1	1	0	f	khác	a	1	buy	a	d	doraemon truyện cười	no	a	a	1	truyện ma truyện conan truyện dân gian
3801	16.137	43074	16	6	Male	5.8	0	0	0	2	2	1	c	bác sĩ	Doctor	làm ruộng	Farmer	Labor	40	UnderHi	làm ruộng	Farmer	Labor	38	UnderHi	med	no	NA	1	f	1	2	2	1	a	NA	a	1	buy	d	b	sách ngoại ngữ sách văn học	yes	c	a	1	đảo hải tặc conan kuroko tuyển thủ vô hình
3990	16.201	43074	16	7	Male	5.8	0	0	0	1	2	1	f	nhà phát minh	Inventor	xây dựng	Worker	Labor	42	UnderHi	làm ruộng	Farmer	Labor	41	UnderHi	med	no	NA	1	f	1	2	1	1	f	phát minh	a	1	buy	c	c	chế tạo vũ khí chế tạo tàu vũ trụ	yes	a	a	1	NA
4159	3.231	43071	6	6	Male	5.8	0	0	0	1	4	1	f	Kinh doanh	Businessman	Tự do	Freelancer	Labor	42	UnderHi	Công nhân	Worker	Labor	35	UnderHi	med	NA	NA	NA	b	1	2	1	0	e	NA	a	1	borrow	d	c	Dragon ball Rèn luyện bản thân	yes	a	a	1	Vũ khí chiến tranh Conan Thời đại bùng nổ ý tưởng
4212	10.215	43074	5	7	Female	5.8	0	0	0	2	3	1	c	nông dân	Farmer	nông dân	Farmer	Labor	34	UnderHi	nông dân	Farmer	Labor	34	UnderHi	med	no	3000000	1	c	1	1	1	0	e	NA	a	1	borrow	a	b	học gần học xa tuổi thơ dữ dội	yes	a	a	1	doraemon truyền thuyết truyện ngắn
4614	15.348	43071	15	9	Male	5.8	0	0	0	2	3	1	f	Lái xe	Driver	Nông dân	Farmer	Labor	41	UnderHi	Nông dân	Farmer	Labor	40	UnderHi	med	no	NA	1	b	1	1	1	0	e	NA	a	1	borrow	b	d	Truyện ngắn Nam Cao, những điều bình dị	yes	b	a	1	Shin, Tý Quậy, Doraemon
4620	15.352	43071	15	9	Female	5.8	0	0	0	2	3	1	d	Công nhân	Worker	Nông dân	Farmer	Labor	52	UnderHi	Nông dân	Farmer	Labor	45	UnderHi	med	no	NA	1	b	1	1	NA	0	e	NA	a	1	borrow	b	d	Tình yêu bất tận của mẹ, khát vọng sống	yes	b	a	1	Shin, Hạt giống tâm hồn, Hãy đặt trách nhiệm lên vai
2744	8.135	43076	8	7	Male	5.75	0	0	0	1	2	1	d	Công an	Police officer	Nông dân	Farmer	Labor	35	Hi	Nông dân	Farmer	Labor	34	Hi	med	no	NA	1	b	1	1	1	0	a	NA	a	1	buy	a	d	Ngữ Văn Hạt giống tâm hồn	yes	a	a	1	Cây khế Chú mèo đi hia Thạch Sanh
3700	13.264	43073	13	8	Female	5.75	0	0	0	3	3	0	NA	không xác định	NA	nông dân	Farmer	Labor	49	UnderHi	nông dân	Farmer	Labor	NA	UnderHi	NA	no	NA	1	c	1	1	NA	0	e	NA	a	1	buy	b	a	cổ tích truyện dân gian việt nam	no	NA	a	1	tấm cám nàng bạch tuyết và 7 chú lùn nàng lọ lem
739	11.111	43071	11	7	Male	5.7	0	0	0	3	3	1	a	Công an	Police officer	Xây dựng	Worker	Labor	50	UnderHi	Làm ruộng	Farmer	Labor	45	UnderHi	med	no	NA	1	e	1	2	2	0	d	NA	a	1	borrow	a	a	Conan Doraemon	yes	d	a	1	10 vạn câu hỏi vì sao Đố hại não Lịch sử thế giới
1245	1.106	43077	1	8	Female	5.7	0	0	0	2	3	1	d	Đầu bếp	Chef	Công nhân	Worker	Labor	39	Hi	Nông dân	Farmer	Labor	40	UnderHi	med	no	NA	0	b	1	2	1	0	b	NA	a	1	buy	a	a	NA	yes	a	a	1	Doraemon Trạng Quỳnh Thám tử lừng danh Conan
2921	16.37	43075	16	8	Male	5.7	0	0	0	4	4	1	d	Không xác định	NA	Nông dân	Farmer	Labor	48	Hi	Nông dân	Farmer	Labor	45	Hi	med	no	NA	1	c	1	1	2	0	a	NA	a	1	borrow	a	a	Sách văn học Khoa học tự nhiên	yes	a	a	1	Sách văn học Khoa học tự nhiên Ngoại ngữ
2995	8.6	43076	8	6	Male	5.7	0	0	0	1	1	1	e	Tài xế	Driver	Thợ hàn	Worker	Labor	34	UnderHi	Nông dân	Farmer	Labor	34	UnderHi	med	NA	NA	1	e	1	1	1	0	b	NA	a	1	buy	a	c	Doraemon Dragon ball	yes	a	a	1	Quê nội Bóng mát tâm hồn
2996	8.61	43076	8	6	Female	5.7	0	0	0	2	3	1	e	Ca sĩ	Singer	Hát Chầu văn	Singer	Intellectuals	35	PostGrad	Công nhân	Worker	Labor	35	PostGrad	med	yes	NA	1	e	1	2	1	0	b	NA	a	1	borrow	b	b	Danh nhân thế giới Truyện cổ tích	yes	a	a	1	Danh nhân thế giới Truyện cổ tích Tý Quậy
3406	16.92	43074	16	6	Male	5.7	0	0	0	2	2	1	d	bác sĩ	Doctor	xây dựng	Worker	Labor	NA	Hi	làm ruộng	Farmer	Labor	NA	Hi	NA	no	NA	1	b	1	1	1	0	c	NA	a	1	buy	d	a	thí nghiệm khoa học khoa học thật tuyệt	yes	a	a	1	khoa học
3856	16.158	43074	16	6	Male	5.7	0	0	0	1	2	1	b	ca sĩ	Singer	làm ruộng	Farmer	Labor	36	UnderHi	cán bộ bảo hiểm	Employee	Labor	35	Uni	med	no	NA	1	b	1	2	1	0	a	NA	a	1	buy	d	d	truyện ngụ ngôn truyện cổ tích	yes	b	a	1	truyện ngụ ngôn truyện cổ tích truyện dành cho học sinh
4000	3.2	43071	6	7	Male	5.7	0	0	0	2	2	1	e	Tài xế	Driver	Nông dân	Farmer	Labor	37	UnderHi	Nông dân	Farmer	Labor	34	UnderHi	med	yes	NA	1	f	1	1	1	0	d	NA	a	1	borrow	a	a	Doraemon Dragon ball	yes	d	a	1	Tình cha Khoa học Mặt nạ đen
95	42	43075	2	8	Female	5.6	0	0	0	4	4	1	f	công nhân	Worker	Làm thợ	Worker	Labor	46	UnderHi	làm ruộng	Farmer	Labor	48	UnderHi	poor	no	NA	1	c	1	1	1	0	a	NA	a	1	borrow	a	a	Shin cậu bé bút chì Đô Rê Mon	yes	a	a	1	Lão hạc Nghìn lẻ một đêm
748	11.12	43071	11	7	Male	5.6	0	0	0	3	3	1	a	Vận động viên bơi lội	Swimmer	Làm ruộng	Farmer	Labor	58	UnderHi	Làm ruộng	Farmer	Labor	54	UnderHi	med	no	NA	0	b	1	1	1	0	e	NA	a	1	borrow	d	d	Tình cha	no	NA	a	1	Kĩ thuật bơi lội 10 vạn câu hỏi vì sao lịch sử thế giới
1254	1.116	43077	1	8	Female	5.6	0	0	0	1	1	1	b	Bác sĩ	Doctor	Nông dân	Farmer	Labor	37	UnderHi	Nông dân	Farmer	Labor	33	UnderHi	med	no	NA	0	f	1	1	1	0	NA	NA	a	1	borrow	b	c	Sách danh nhân Sách văn học	yes	b	a	1	Trạng Quỳnh Doraemon Truyện Kiều
1263	1.156	43077	1	9	Male	5.6	0	0	0	3	3	1	d	Thợ mộc	Worker	Nông dân	Farmer	Labor	42	UnderHi	Nông dân	Farmer	Labor	43	UnderHi	med	no	NA	1	b	1	2	1	0	e	NA	a	1	borrow	a	a	Lá cờ thêu sáu chữ vàng Tội ác và trừng phạt	yes	a	a	1	Thám tử lừng danh Conan Doraemon Ô Long viện
2766	8.1	43076	8	7	Female	5.6	0	0	0	2	3	1	d	Kĩ sư	Engineer	Tài xế	Driver	Labor	37	UnderHi	Buôn bán	Seller	Labor	NA	UnderHi	med	no	NA	1	a	0	3	2	1	c	NA	a	1	buy	d	a	Sách danh nhân Phổ biến khoa học	yes	b	a	1	Thiên nhiên khoa học Đời sống con người Truyện võ tự vệ
2770	8.104	43076	8	7	Male	5.6	0	0	0	1	2	1	d	NA	NA	Công Nhân	Worker	Labor	41	PostGrad	Công nhân	Worker	Labor	36	UnderHi	med	no	NA	1	f	1	2	2	1	c	NA	a	1	buy	a	b	Kiên trì	yes	b	a	1	NA
2813	16.279	43074	16	7	Male	5.6	0	0	0	3	3	1	c	Công an	Police officer	Nông dân	Farmer	Labor	45	NA	Nông dân	Farmer	Labor	40	NA	med	no	NA	1	a	0	2	1	NA	a	NA	a	1	buy	b	b	Những phát minh vĩ đại Tuổi thơ dữ dội	yes	a	a	1	Những điều lý thú về các loại hành tinh Những vận may trong cuộc sống Những điều lý thú về khoa học
3028	8.23	43076	8	6	Female	5.6	0	0	0	1	2	1	b	Công an	Police officer	Công Nhân	Worker	Labor	38	UnderHi	Giáo viên mầm non	Teacher	Intellectuals	35	Uni	med	no	NA	1	a	0	1	1	0	a	NA	a	1	buy	d	d	Kaito Kid Những ngày thơ ấu	yes	c	a	1	Conan Doraemon Kinh hoàng lúc nửa đêm
3343	16.568	43074	16	NA	Male	5.6	0	0	0	2	3	1	b	họa sĩ	Painter	nông dân	Farmer	Labor	43	Hi	nông dân	Farmer	Labor	39	Hi	med	no	NA	1	f	1	1	1	1	d	NA	a	1	borrow	c	NA	sách về mĩ thuật sách dạy vẽ và nghiên cứu	no	d	a	1	tắt đèn sách ngữ văn 10 sách dạy đánh liên quân
3994	16.205	43074	16	7	NA	5.6	0	0	0	2	4	0	NA	bộ đội	Soldier	thợ xây	Worker	Labor	39	NA	công nhân	Worker	Labor	40	NA	med	no	NA	NA	b	1	1	1	0	d	NA	a	1	borrow	b	a	vật lí văn	yes	c	a	1	doraemon tý quậy conan
4325	3.284	43071	6	6	Male	5.6	0	0	0	1	2	1	b	Công an	Police officer	Cán bộ	Public servant	Intellectuals	38	Uni	Công nhân	Worker	Labor	38	Hi	med	no	NA	1	c	1	2	1	0	b	NA	a	1	borrow	a	a	Thế giới động vật Khám phá thế giới	yes	c	a	1	Nhà du hành vũ trụ Khám phá vũ trụ
4336	3.295	43071	6	6	Female	5.6	0	0	0	1	2	1	b	Công nhân	Worker	Thợ xây	Worker	Labor	42	UnderHi	Công nhân	Worker	Labor	33	UnderHi	med	no	NA	1	c	1	2	1	0	a	NA	a	1	borrow	a	a	Văn học Tý Quậy	yes	b	a	1	Conan Cậu bé thông minh Doraemon
4872	10.81	43075	5	6	Female	5.6	0	0	0	1	2	1	d	thiết kế thời trang	Fashion designer	thợ xây	Worker	Labor	36	Hi	công nhân	Worker	Labor	31	Hi	rich	no	NA	1	e	1	2	1	1	d	NA	a	1	borrow	d	a	hạt giống tâm hồn ý nghĩa cuộc sống	no	d	a	1	văn học dân gian từ tiếng anh mỗi ngày thắc mắc giới tính con người
58	39	43075	2	8	Male	5.5	0	0	0	1	2	1	b	công nhân	Worker	làm ruộng	Farmer	Labor	36	UnderHi	làm thợ	Worker	Labor	30	Hi	med	no	NA	1	b	1	2	1	0	a	NA	a	1	buy	d	b	Đô Rê Mon Cô nan	yes	d	a	1	Truyện cổ tích Truyện cười Truyện dân gian
131	74	43075	2	9	Female	5.5	0	0	0	2	6	0	b	chưa xác định	NA	làm ruộng	Farmer	Labor	41	UnderHi	làm ruộng	Farmer	Labor	40	UnderHi	poor	no	NA	1	b	1	2	1	0	a	NA	a	1	borrow	a	c	Sách văn học Truyện cổ tích	yes	b	a	1	NA
280	187	43074	3	8	Female	5.5	0	0	0	1	4	1	c	Chưa xác định	NA	Làm ruộng	Farmer	Labor	34	UnderHi	Làm ruộng	Farmer	Labor	33	UnderHi	med	no	NA	1	a	0	2	3	1	f	Truyện tranh	a	1	borrow	a	a	Doraemon Tý quậy	yes	b	a	1	Tìm hiểu thiên nhiên và con người Việt Nam Dế Mèn phiêu lưu ký Tìm hiểu về các Châu Lục trên thế giới
587	11.173	43071	11	8	Female	5.5	0	0	0	3	4	1	b	Nhà văn	Writer	làm ruộng	Farmer	Labor	42	UnderHi	làm ruộng	Farmer	Labor	42	Hi	med	no	NA	1	c	1	1	2	0	a	NA	a	1	borrow	a	a	Học ăn, học nói ,học gói, học mở Mỗi ngày nên chọn một niềm vui	yes	a	a	1	Truyện về các danh lam thắng cảnh của Việt Nam và ngoài thế giới Truyện danh nhân đất Việt Hạt giống tâm hồn tập 8
820	9.109	43073	9	7	Female	5.5	0	0	0	2	2	1	d	Công an	Police officer	làm ruộng	Farmer	Labor	40	UnderHi	Công nhân	Worker	Labor	36	Hi	med	no	NA	1	b	1	1	1	NA	f	Truyện tranh	a	1	borrow	a	c	500 câu chuyện đạo đức Núi lửa nóng hơn lửa	yes	a	a	1	Các phong tục trên thế giới Tình cha Truyện cổ tích việt nam
823	9.112	43073	9	7	Female	5.5	0	0	0	3	3	1	b	Công an	Police officer	làm ruộng	Farmer	Labor	44	Hi	Công nhân	Worker	Labor	39	Hi	med	no	NA	1	a	0	1	2	0	a	NA	a	1	borrow	c	d	Hạt giống tâm hồn Cánh buồm đỏ thắm	yes	b	a	1	Danh tướng Lý Thường Kiệt Khoa học cuộc sống Tự nhiên vũ trụ
918	11.153	43071	11	8	Female	5.5	0	0	0	3	3	1	b	Công nhân	Worker	Nông dân	Farmer	Labor	50	UnderHi	Nông dân	Farmer	Labor	50	UnderHi	NA	no	NA	1	c	1	2	2	0	e	NA	a	1	borrow	a	c	Hãy lạc quan để vui sống Dám tha thứ	yes	a	a	1	Tấm Cám Doraemon Sự tích dưa hấu
931	11.166	43071	11	8	Male	5.5	0	0	0	2	3	1	f	Cơ khí	Engineer	Nông dân	Farmer	Labor	42	UnderHi	Công nhân	Worker	Labor	42	UnderHi	med	no	NA	1	b	1	1	2	0	e	NA	a	1	borrow	a	a	Điện Biên Phủ - Điểm hẹn lịch sử	yes	a	a	1	Người người lớp lớp Anh hùng lấp lỗ châu mai Điện Biên Phủ của chúng em
972	11.34	43071	11	6	Male	5.5	0	0	0	3	3	1	b	Công an	Police officer	Công nhân	Worker	Labor	45	UnderHi	Công nhân	Worker	Labor	47	UnderHi	rich	no	NA	1	c	1	2	1	0	a	NA	a	1	borrow	b	c	Sự tích cây khế Tấm Cám	yes	b	a	1	Cậu bé giỏi võ Hoàng tử ếch Công chúa ngủ trong rừng
1076	14.11	43071	14	8	Female	5.5	0	0	0	1	0	1	b	Họa sĩ	Painter	Nông dân	Farmer	Labor	72	UnderHi	Nông dân	Farmer	Labor	62	UnderHi	med	no	NA	1	a	0	1	1	1	a	NA	a	1	borrow	b	b	Quà tặng cuộc sống Hạt giống tâm hồn	yes	a	a	1	Thám tử lừng danh Conan Doraemon Cậu bé bút chì
1080	14.114	43071	14	8	Female	5.5	0	0	0	3	3	1	e	Công an	Police officer	Tiểu thương	Businessman	Labor	51	UnderHi	Tiểu thương	Businessman	Labor	46	UnderHi	med	no	200000000	1	a	0	2	1	1	a	NA	a	1	gift	a	a	Quà tặng cuộc sống Chúc một ngày tốt lành	yes	a	a	1	Thám tử lừng danh Conan Doraemon Cậu bé bút chì
1112	14.146	43071	14	9	Female	5.5	0	0	0	2	5	1	b	Giáo viên	Teacher	Tự do	Freelancer	Labor	49	UnderHi	Tự do	Freelancer	Labor	49	UnderHi	rich	no	NA	0	b	1	1	1	0	a	NA	a	1	borrow	a	d	Cuộc phiêu lưu của Nils Holgersson Mắt biếc	yes	a	a	1	Truyện Kiều
1203	1.08	43077	1	6	Female	5.5	0	0	0	2	2	1	b	Trang điểm - Thiết kế	Makeup artist	Xây dựng	Worker	Labor	43	Hi	Thợ may	Worker	Labor	42	Hi	rich	no	NA	1	a	0	2	1	0	a	NA	a	1	borrow	b	c	Phòng tránh tai nạn bất ngờ đối với học sinh Kĩ năng sống dành cho học sinh	yes	a	a	1	Thám tử lừng danh Conan Doraemon Cậu bé bút chì
1260	1.123	43077	1	8	Female	5.5	0	0	0	1	2	1	a	An ninh	Guard	Thợ mộc	Worker	Labor	42	UnderHi	Nông dân	Farmer	Labor	46	UnderHi	med	yes	6000000	1	c	1	3	3	1	a	NA	a	1	buy	d	b	Cậu bé bút chì Doraemon	yes	b	a	1	Trạng Quỳnh Truyện Kiều Tấm Cám
1276	1.169	43077	1	9	Female	5.5	0	0	0	3	4	1	d	Sân khấu điện ảnh	Artist	Nông dân	Farmer	Labor	49	UnderHi	Nông dân	Farmer	Labor	42	UnderHi	med	no	NA	0	c	1	2	2	0	a	NA	a	1	borrow	a	a	Bụi phấn Hạt giống tâm hồn	yes	a	a	1	Thế giới rộng mở Tư duy sáng tạo Danh thần đất Việt
1867	2.214	43076	4	8	Male	5.5	0	0	0	2	2	1	a	Nhạc sĩ	Songwriter	Nông dân	Farmer	Labor	41	UnderHi	Nông dân	Farmer	Labor	40	UnderHi	med	no	NA	1	b	1	3	2	0	NA	NA	a	1	buy	d	d	Hạt giống tâm hồn	no	NA	a	1	Hóa học Lịch sử Sinh học
1882	2.233	43076	4	8	Female	5.5	0	0	0	1	2	1	NA	Bác sĩ	Doctor	Công nhân	Worker	Labor	35	Hi	Công nhân	Worker	Labor	35	Hi	med	no	NA	1	a	0	1	1	0	a	NA	a	1	borrow	b	c	Dế Mèn phiêu lưu kí Hai cây phong	yes	d	a	1	Làng tuyên Phút dành cho cha Hạt giống tâm hồn
2089	2.46	43076	4	6	Male	5.5	0	0	0	1	2	NA	b	Kiến trúc sư	Architect	Công Nhân	Worker	Labor	45	Hi	Nông dân	Farmer	Labor	40	Hi	med	no	NA	1	d	1	2	1	0	f	Truyện tranh	a	1	borrow	b	d	Tình cha ấm áp Tốt-tô-chan	yes	a	a	1	Thám tử lừng danh Co nan Cậu bé bút chì Doraemon
2617	13.8	43073	13	6	Female	5.5	0	0	0	2	3	1	c	Phiên dịch ngoại ngữ	Interpreter	Thợ xây	Worker	Labor	39	UnderHi	Công nhân	Worker	Labor	37	UnderHi	med	no	NA	1	a	0	1	1	0	d	NA	a	1	gift	a	a	Sách dạy tiếng nước ngoài sách dạy nấu ăn	yes	a	a	1	sách về bác hồ sách thiếu niên tiền phong hồ chí minh sách hướng dẫn vẽ
2634	15.35	43071	15	6	Female	5.5	0	0	0	1	2	1	e	Bác sĩ	Doctor	Nông dân	Farmer	Labor	36	UnderHi	Nông dân	Farmer	Labor	33	UnderHi	med	yes	NA	1	b	1	1	1	0	e	NA	a	1	borrow	b	c	Kỹ năng sống dành cho học sinh, không gia đình	yes	b	a	1	doraemon, shin - cậu bé bút chì, conan
2719	8.125	43076	8	7	Male	5.5	0	0	0	1	2	1	e	NA	NA	Nông dân	Farmer	Labor	45	UnderHi	Nông dân	Farmer	Labor	40	NA	med	no	NA	1	b	1	2	2	0	b	NA	a	1	buy	b	b	Lịch sử Việt Nam Tình yêu không bằng lời nói	yes	d	a	1	Truyện Kiều Truyện cười Truyện cổ tích
2797	16.263	43074	16	7	Female	5.5	0	0	0	1	4	1	c	Công nhân	Worker	Thợ xây	Worker	Labor	35	UnderHi	Nông dân	Farmer	Labor	34	UnderHi	rich	yes	3000000-4000000	1	c	1	2	2	0	a	NA	a	1	borrow	b	a	Kì quan thế giới Cuộc đời của các danh nhân	yes	a	a	1	Túp lều của bác Tom Những câu chuyện cổ tích có trong xã hội Sách hướng dẫn nghề
2809	16.275	43074	16	7	Male	5.5	0	0	0	1	2	1	d	Công nhân	Worker	Nông dân	Farmer	Labor	34	Hi	Công nhân	Worker	Labor	34	UnderHi	poor	yes	NA	1	e	1	2	1	1	e	NA	a	1	buy	d	a	Kì quan thế giới Doraemon	yes	c	a	1	Conan 100 truyện cổ tích Việt Nam 100 truyện kể con nghe
2812	16.278	43074	16	7	Female	5.5	0	0	0	2	3	1	d	Bác sĩ	Doctor	Nông dân	Farmer	Labor	43	Hi	Công nhân	Worker	Labor	41	UnderHi	med	no	NA	1	a	0	2	1	0	NA	NA	a	1	borrow	a	a	Bài học yêu của Tiểu Ma Vương Shin	yes	a	a	1	Những câu chuyện khuyến khích trẻ giao tiếp Những câu chuyện khuyến khích trẻ sáng tạo học hỏi Nghìn lẻ một đêm
2926	16.375	43075	16	8	Female	5.5	0	0	0	2	2	1	d	Giáo viên	Teacher	Nông dân	Farmer	Labor	37	Hi	Nông dân	Farmer	Labor	34	Hi	med	no	NA	1	a	0	2	1	0	a	NA	a	1	borrow	d	b	Sách danh nhân Sách nghệ thuật	yes	d	a	1	Truyện văn học Hướng dẫn nghề Ngoại ngữ
3149	16.458	43074	16	8	Male	5.5	0	0	0	2	2	1	d	Bác sĩ	Doctor	Xây dựng	Worker	Labor	41	UnderHi	Nông dân	Farmer	Labor	41	UnderHi	rich	no	NA	1	c	1	2	2	0	c	NA	a	1	borrow	a	c	Những cuộc phiêu lưu của Tom Sawyer Tiếng gọi hoang dã	NA	a	a	1	Giới thiệu về các nhà khoa học Lịch sử Truyện tranh
3163	16.47	43074	16	8	Male	5.5	0	0	0	1	2	1	d	Nhà sinh học	Scientist	Nông dân	Farmer	Labor	37	UnderHi	Nông dân	Farmer	Labor	33	UnderHi	med	no	NA	1	b	1	2	1	NA	c	NA	a	1	borrow	a	b	Tôi muốn biết ở đâu Sổ tay địa danh Việt Nam	yes	a	a	1	Tôi muốn biết tại sao Tôi muốn biết như thế nào Tôi muốn biết về mọi thứ
3275	3.51	43071	6	9	Male	5.5	0	0	0	2	2	1	f	Tài xế	Driver	Nông dân	Farmer	Labor	37	UnderHi	Nông dân	Farmer	Labor	37	UnderHi	poor	no	NA	1	b	1	2	1	0	e	NA	a	1	buy	a	d	Doraemon Tý Quậy	yes	a	a	1	Truyện Kiều Đi để trở về
3325	16.557	43074	16	9	Female	5.5	0	0	0	2	2	1	NA	kế toán	Accountant	nông dân	Farmer	Labor	48	NA	nông dân	Farmer	Labor	45	UnderHi	med	no	NA	1	b	1	2	1	0	a	NA	a	1	borrow	a	a	sách văn học hạt giống tâm hồn	yes	a	a	1	lịch sử việt nam sherlock holmes
3377	16.58	43074	16	9	Male	5.5	0	0	0	3	3	1	a	hacker	Hacker	nông dân	Farmer	Labor	NA	UnderHi	nông dân	Farmer	Labor	NA	UnderHi	rich	no	NA	1	f	1	1	1	0	e	NA	a	1	buy	d	a	sách dạy nghề những điều lí thú xung quanh ta	yes	b	a	1	sách dạy nghề sách dạy kĩ năng sống sách học tốt
3384	3.75	43071	6	9	Male	5.5	0	0	0	2	2	0	a	Bác sĩ	Doctor	Bộ đội	Soldier	Labor	46	Uni	Giáo viên	Teacher	Intellectuals	45	Uni	med	no	NA	1	d	1	2	1	1	b	NA	a	1	buy	d	c	Những nhà phát minh vĩ đại Bí ẩn cơ thể con người	yes	a	a	1	Chí Phèo Bỉ vỏ Làm đĩ
3416	16.98	43074	16	6	Male	5.5	0	0	0	5	5	1	d	nhà văn	Writer	xây dựng	Worker	Labor	61	UnderHi	làm ruộng	Farmer	Labor	51	NA	med	NA	NA	1	a	0	1	1	0	e	NA	a	1	buy	a	a	bí ẩn tự nhiên vũ trụ 100 phát minh trong lịch sử	yes	a	a	1	khoa học sáng tạo vũ trụ
3469	3.76	43071	6	9	Male	5.5	0	0	0	2	2	1	e	Nghề điện	Engineer	Nông dân	Farmer	Labor	47	UnderHi	Nông dân	Farmer	Labor	45	UnderHi	med	no	NA	1	b	1	2	2	0	e	NA	a	1	buy	d	d	Những nhà phát minh vĩ đại Khoa học và đời sống	no	d	a	1	Tự nhiên vũ trụ Động vật thực vật Bí quyết
3472	3.79	43071	6	9	Male	5.5	0	0	0	1	2	1	f	Phi công	Pilot	Nông dân	Farmer	Labor	40	UnderHi	Nông dân	Farmer	Labor	39	UnderHi	med	no	NA	0	f	1	1	1	0	d	NA	a	1	borrow	d	b	Tô sư trọng đạo Chí Phèo	yes	a	a	1	Tự nhiên vũ trụ Nguyễn Công Hoan Vợ nhặt
3560	15.163	43071	15	7	Male	5.5	0	0	0	1	2	1	e	Lính cứu hỏa	Firefighter	Nông dân	Farmer	Labor	37	UnderHi	Nông dân	Farmer	Labor	33	UnderHi	NA	no	NA	1	b	1	1	1	1	c	NA	a	1	buy	d	a	khoa học vũ trụ, nghiên cứu thực vật	yes	a	a	1	xác ướp ai cập, thiên nhiên hàm hạp
3756	13.29	43073	13	8	Female	5.5	0	0	0	7	7	0	NA	công ty	Businessman	nông dân	Farmer	Labor	NA	NA	nông dân	Farmer	Labor	56	NA	poor	NA	NA	1	e	1	1	1	1	e	NA	a	1	buy	d	b	truyện tình yêu sách nấu ăn	no	a	a	1	NA
4115	10.193	43075	5	7	Female	5.5	0	0	0	1	3	1	d	bác sĩ	Doctor	thợ xây	Worker	Labor	35	UnderHi	công nhân	Worker	Labor	34	UnderHi	med	no	NA	1	a	0	2	2	0	a	NA	a	1	borrow	b	a	tấm cám lá cờ thêu 6 chữ vàng	yes	a	a	1	những tấm lòng cao cả 12 nàng công chúa tình cha con
4239	10.242		5	7	Male	5.5	0	0	0	0	0	NA	d	đầu bếp	Chef	nông dân	Farmer	Labor	39	UnderHi	công nhân	Worker	Labor	38	UnderHi	med	yes	6000000	0	a	0	1	1	0	e	NA	a	1	NA	NA	b	doraemon conan	yes	b	a	1	truyện thiếu nhi conan shin doraemon
4243	1.246		5	7	Male	5.5	0	0	0	1	2	1	a	vòng quanh thế thới	Explorer	nông dân	Farmer	Labor	34	UnderHi	nông dân	Farmer	Labor	33	UnderHi	NA	yes	NA	1	a	0	2	NA	NA	b	NA	a	1	borrow	a	a	túp lều của tom mẹ tôi	yes	a	a	1	phạm hổ trần hải dưng kĩ năng sống
4262	10.265		5	7	Male	5.5	0	0	0	2	3	1	c	lái máy xúc	Driver	nông dân	Farmer	Labor	43	UnderHi	nông dân	Farmer	Labor	42	Hi	med	yes	10000000	1	b	1	2	NA	0	e	NA	a	1	borrow	d	a	doraemon superman	yes	a	a	1	doraemon cây bút thần
4390	10.355	43074	5	8	Male	5.5	0	0	0	2	3	NA	e	bộ đội	Soldier	nông dân	Farmer	Labor	43	NA	nông dân	Farmer	Labor	NA	UnderHi	med	NA	NA	0	b	1	1	1	0	a	NA	a	1	buy	a	a	công nghệ sinh học hạt giống tâm hồn	yes	c	a	1	dế mèn phưu lưu kí chiến tranh và hòa bình khảo cổ dễ sợ
4519	10.428	43074	5	9	Male	5.5	0	0	0	2	4	1	d	đầu bếp	Chef	tự do	Freelancer	Labor	40	UnderHi	công nhân	Worker	Labor	40	UnderHi	med	no	NA	0	f	1	1	1	0	e	NA	a	1	borrow	c	c	bồ câu không đưa thư kĩ thuật thời sơ ban	yes	c	a	1	truyện kiều tắt đèn truyện dành cho thiếu niên
4615	15.349	43071	15	9	Male	5.5	0	0	0	2	2	NA	d	Ca sĩ	Singer	Nông dân	Farmer	Labor	45	UnderHi	Nông dân	Farmer	Labor	37	UnderHi	med	NA	NA	1	b	1	1	1	0	d	NA	a	1	borrow	b	d	Truyện Kiều, Tắt đèn	yes	d	a	1	Shin, Tý Quậy, Conan
4629	15.358	43071	15	9	Male	5.5	0	0	0	1	2	1	f	Nghề điện	Engineer	Công nhân	Worker	Labor	42	UnderHi	Công nhân	Worker	Labor	34	UnderHi	med	no	NA	1	e	1	1	1	0	e	NA	a	1	borrow	b	d	tâm sự trọng đạo, Truyện Kiều	yes	b	a	1	bụi phấn, quà tặng cuộc sống
4641	15.362	43071	15	9	Male	5.5	0	0	0	1	3	1	e	Kinh doanh	Businessman	Nông dân	Farmer	Labor	40	UnderHi	Nông dân	Farmer	Labor	37	Hi	med	no	NA	1	b	1	1	2	0	e	NA	a	1	buy	b	a	conan, doraemon	yes	a	a	1	Chiến tranh và hòa bình, Tập truyện của Ngô Tất Tố, Chí Phèo
4682	15.382	43071	15	9	Male	5.5	0	0	0	2	2	1	e	Kinh doanh	Businessman	Nông dân	Farmer	Labor	35	UnderHi	NA	NA	NA	NA	NA	med	no	NA	0	b	1	2	1	0	f	truyện tranh	a	1	borrow	d	d	doraemon truyện cổ tích	yes	b	a	1	Chiến tranh và hòa bình, dế mèn phưu lưu ký, chí phèo
4737	10.514		5	9	Male	5.5	0	0	0	3	3	1	c	tài xế	Driver	nông dân	Farmer	Labor	43	NA	nông dân	Farmer	Labor	41	NA	poor	NA	NA	1	b	1	1	1	1	d	NA	a	1	borrow	b	d	chìa khóa thành công doraemon	yes	d	a	1	chiến tranh và hòa bình đắc nhân tâm doraemon
4751	10.525		5	9	Male	5.5	0	0	0	2	3	1	f	đầu bếp	Chef	nông dân	Farmer	Labor	42	NA	nông dân	Farmer	Labor	37	NA	med	yes	5000000	1	a	0	2	1	1	e	NA	a	1	borrow	d	d	lịch sử việt nam bằng tranh tuyển tập nguyễn nhật ánh	yes	c	a	1	conan sông đông êm đềm mùa hoa thuốc phiện cuối cùng
4757	10.53		5	9	Male	5.5	0	0	0	2	2	1	f	phi công	Pilot	nông dân	Farmer	Labor	38	Hi	công nhân	Worker	Labor	37	Hi	NA	yes	5000000	1	b	1	1	1	0	d	NA	a	1	borrow	a	d	để 1 tâm hồn đẹp óc sáng suốt	yes	a	a	1	chiến tranh và hòa bình mùa hoa thuốc phiện cuối cùng sông đông êm đềm
4874	10.83	43075	5	6	Female	5.5	0	0	0	6	6	1	b	ca sĩ	Singer	lăn sơn	Worker	Labor	48	NA	công ty	Businessman	Labor	44	NA	med	no	NA	1	a	0	2	2	1	a	NA	a	1	borrow	b	a	truyện văn học truyện văn hóa xã hội và đời sống	yes	b	a	1	doremon công chúa ori sapia
814	11.44	43071	11	6	Female	5.4	0	0	0	2	2	1	c	Họa sĩ	Painter	Thợ xây	Worker	Labor	41	UnderHi	Công nhân	Worker	Labor	36	Uni	rich	yes	NA	1	e	1	2	1	0	d	NA	a	1	buy	a	a	Những truyện hay cho thiếu nhi Công chúa lọ lem	yes	b	a	1	Truyện tên lửa của tôi Truyện những chú cừu thông minh Tâm Cám
1224	1.28	43077	1	6	Male	5.4	0	0	0	1	2	1	a	Đầu bếp	Chef	Thợ mộc	Worker	Labor	35	UnderHi	Nội trợ	Unemployed	Labor	32	UnderHi	med	no	NA	1	b	1	1	1	1	e	NA	a	1	buy	a	c	Hướng dẫn nghề nghiệp Naruto	yes	d	a	1	Bóng Boling Những câu chuyện về thiên nhiên quanh ta Sách khoa học
2763	8.97	43076	8	7	Male	5.4	0	0	0	1	1	1	a	NA	NA	Tài xế	Driver	Labor	45	UnderHi	Thợ may	Worker	Labor	36	Hi	med	no	NA	1	a	0	2	3	0	d	NA	a	1	borrow	d	a	Thiên nhiên hoang dã 55 cách để tự tin	yes	b	a	1	NA
2860	16.319	43074	16	7	Female	5.4	0	0	0	2	2	1	b	Diễn viên	Actor	Nông dân	Farmer	Labor	42	UnderHi	Nông dân	Farmer	Labor	41	UnderHi	med	no	NA	1	c	1	1	1	0	a	NA	a	1	buy	b	NA	Giáo dục nhân cách Cẩm nang cuộc sống	yes	c	a	1	Conan Shin Cách nấu ăn
3389	16.78	43074	16	6	Female	5.4	0	0	0	2	2	1	b	đầu bếp	Chef	xây dựng	Worker	Labor	39	Hi	công nhân	Worker	Labor	40	NA	med	no	NA	1	b	1	2	2	0	a	NA	a	1	buy	b	a	cho và nhận hạt giống tâm hồn	yes	d	a	1	truyện văn học
3397	16.85	43074	16	6	Female	5.4	0	0	0	1	0	1	b	thư kí	Secretary	xây dựng	Worker	Labor	35	Hi	làm ruộng	Farmer	Labor	34	Hi	med	no	NA	1	a	0	3	2	0	a	NA	a	1	borrow	b	a	bài học vô giá hỏi đáp nhanh trí	yes	d	a	1	chủ đề văn học
3415	16.588	43074	16	9	Male	5.4	0	0	0	1	2	1	a	kĩ sư	Engineer	bưu điện	Employee	Labor	44	Hi	nông dân	Farmer	Labor	37	Hi	med	yes	NA	1	a	0	1	2	0	e	NA	a	1	buy	d	NA	lịch sử việt nam kĩ năng sống	yes	d	a	1	năng lượng mặt trời cuộc sống của những người ả rập tráng sĩ ngân trượt
4366	10.331	43074	5	8	Male	5.4	0	0	0	5	5	1	f	thợ xăm	Tatoo artist	nông dân	Farmer	Labor	50	UnderHi	nông dân	Farmer	Labor	45	UnderHi	rich	no	NA	1	e	1	1	1	0	e	NA	a	1	buy	a	c	công nghệ sinh học học ăn học nói học gói học mở	yes	d	a	1	phùng hưng phục hổ nước mắt cá sấu cây khế
4583	15.335	43071	15	9	Male	5.4	0	0	0	2	2	1	f	Giám đốc	Director	lái xe	Driver	Labor	39	UnderHi	Nông dân	Farmer	Labor	38	UnderHi	med	yes	20000000	1	f	1	1	1	0	b	NA	a	1	borrow	b	d	truyện kiều	no	b	a	1	lão hạc
4888	10.102	43075	5	6	Female	5.4	0	0	0	2	3	1	NA	công an	Police officer	làm ruộng	Farmer	Labor	43	Hi	bán hàng	Seller	Labor	40	Hi	med	no	NA	1	a	0	2	1	1	d	NA	a	1	borrow	b	a	kĩ năng sống dành cho học sinh chuyện thì cử và lập nghiệp của học trò xưa	yes	a	a	1	conan doremon shin cậu bé bút chì
736	11.108	43071	11	7	Female	5.3	0	0	0	1	2	1	b	Bác sĩ	Doctor	Làm ruộng	Farmer	Labor	40	UnderHi	Làm ruộng	Farmer	Labor	37	UnderHi	rich	no	NA	1	a	0	1	1	0	a	NA	a	1	borrow	a	c	Truyện tích chu Truyện mùa đông gió lạnh	yes	b	a	1	Hướng dẫn Tiếng Anh Lịch sử Việt Nam Khoa học về xã hội
743	11.115	43071	11	7	Male	5.3	0	0	0	3	3	1	d	Họa sĩ; ca sĩ	Painter	Lái xe	Driver	Labor	38	UnderHi	Công nhân	Worker	Labor	35	UnderHi	med	no	NA	1	c	1	1	1	1	d	NA	a	1	buy	a	b	Học vẽ Nhạc	yes	d	a	1	Conan Doraemon Lịch sử thế giới
774	11.6	43071	11	6	Male	5.3	0	0	0	2	2	0	NA	Bác sĩ	Doctor	Công nhân	Worker	Labor	42	UnderHi	Công nhân	Worker	Labor	36	UnderHi	med	no	NA	1	e	1	2	2	0	e	NA	a	1	borrow	b	d	Cuốn sách về nghề nghiệp Cuốn sách về đạo đức	yes	d	a	1	NA
841	9.141	43073	9	7	Male	5.3	0	0	0	3	3	0	f	làm thợ sửa chữa nhỏ	Worker	bảo vệ	Guard	Labor	48	Hi	Công nhân	Worker	Labor	46	Hi	med	no	NA	1	a	0	1	1	0	e	NA	a	1	borrow	b	a	Hạt giống tâm hồn Gió lạnh đầu mùa	yes	a	a	1	NA
1246	1.108	43077	1	8	Female	5.3	0	0	0	3	3	1	d	Kế toán	Accountant	Công nhân	Worker	Labor	39	UnderHi	Nông dân	Farmer	Labor	40	UnderHi	med	no	NA	1	b	1	2	2	1	e	NA	a	1	borrow	b	a	Hãy lạc quan để vui sống Rèn luyện kĩ năng sống	yes	a	a	1	Truyện Kiều Trạng Nguyên Thám tử lừng danh Conan
1281	1.174	43077	1	9	Female	5.3	0	0	0	1	2	1	b	Công nhân	Worker	Nông dân	Farmer	Labor	45	UnderHi	Nông dân	Farmer	Labor	45	UnderHi	med	no	NA	1	a	0	1	1	1	a	NA	a	1	borrow	a	a	Yêu văn và học văn Tình yêu bất tận của người mẹ	yes	a	a	1	Hạt giống tâm hồn Truyên ngắn Nam Cao Truyện Kiều
1880	2.222	43076	4	8	Male	5.3	0	0	0	3	3	NA	f	Điện lạnh	Engineer	Xây dựng	Worker	Labor	36	UnderHi	Nông dân	Farmer	Labor	34	UnderHi	rich	no	NA	1	b	1	1	1	0	d	NA	a	1	borrow	a	a	Kim Lân Sổ tay lịch sử Việt Nam	yes	c	a	1	NA
2801	16.267	43074	16	7	Female	5.3	0	0	0	3	4	1	d	Bác sĩ	Doctor	Nông dân	Farmer	Labor	45	UnderHi	Nông dân	Farmer	Labor	45	UnderHi	med	NA	NA	1	a	0	2	1	0	b	NA	a	1	borrow	a	a	A Cư và những người bạn What tôi muốn biết cái gì	yes	d	a	1	Hoàng tử bé When? tôi muốn biết khi nào Những câu chuyện cảm động về tình cha con
2987	8.52	43076	8	6	Male	5.3	0	0	0	3	3	1	e	Giáo viên	Teacher	Công Nhân	Worker	Labor	43	UnderHi	Công nhân	Worker	Labor	41	Hi	med	NA	NA	1	c	1	2	1	0	b	NA	a	1	borrow	d	a	Dragon ball Danh nhân Việt Nam	yes	a	a	1	Hạt giống tâm hồn Kì tích nghiên cứu
3326	16.558	43074	16	9	Male	5.3	0	0	0	1	1	1	a	bộ đội	Soldier	nông dân	Farmer	Labor	43	UnderHi	nông dân	Farmer	Labor	40	UnderHi	NA	no	NA	1	c	1	1	1	0	a	NA	a	1	buy	a	b	kĩ năng sống nghệ thuật ứng xử thông minh	yes	a	a	1	khát vọng nhìn xa tìm hiểu văn hóa kĩ năng sống
3370	16.69	43074	16	6	Male	5.3	0	0	0	1	3	1	a	công an	Police officer	xây dựng	Worker	Labor	38	Hi	nấu ăn	Chef	Labor	36	Hi	med	no	NA	1	d	1	2	1	0	f	học giỏi văn toán	a	1	borrow	a	a	học giỏi văn toán 100 phát minh làm nên lịch sử	yes	a	a	1	103 bài văn hay cách để học giỏi văn toán
3418	16.59	43074	16	9	Male	5.3	0	0	0	2	2	1	f	lắp giáp ô tô	Engineer	nông dân	Farmer	Labor	37	UnderHi	nông dân	Farmer	Labor	39	UnderHi	NA	no	NA	1	f	1	2	2	0	e	NA	a	1	buy	d	a	sách dạy nghề sách dạy kĩ năng sống	yes	d	a	1	sách nam cao sách văn học sách bài toán hay
3547	3.111	43071	6	8	Male	5.3	0	0	0	5	5	1	d	Kinh doanh	Businessman	Không xác định	NA	NA	58	Hi	Nông dân	Farmer	Labor	54	Hi	NA	no	NA	1	b	1	2	2	NA	d	NA	a	1	borrow	d	NA	Tìm hiểu về khoa học tự nhiên xã hội About	yes	d	a	1	Đôn-ki-ô-tê Những người cùng khổ Phát triển khả năng tư duy suy luận
4133	15.237	43071	15	8	Male	5.3	0	0	0	1	2	0	e	Game thủ	Gamer	Nông dân	Farmer	Labor	39	UnderHi	Nông dân	Farmer	Labor	35	UnderHi	NA	no	NA	1	b	1	2	2	0	a	NA	a	1	borrow	a	b	Truyện cổ tích, truyện tranh	yes	b	a	1	Doraemon, Tấm Cám, Dế Mèn phưu lưu ký
4585	15.336	43071	15	9	Male	5.3	0	0	0	1	2	0	f	NA	NA	Nông dân	Farmer	Labor	46	UnderHi	Giáo viên mầm non	Teacher	Intellectuals	39	PostGrad	med	no	NA	1	f	1	1	1	0	e	NA	a	1	borrow	b	d	Tập truyện ngắn Nam Cao, Tắt đèn	yes	b	a	1	Tý Quậy, cậu bé bút chì, conan
4602	15.343	43071	15	9	Male	5.3	0	0	0	1	3	1	f	NA	NA	Nông dân	Farmer	Labor	43	UnderHi	Nông dân	Farmer	Labor	42	UnderHi	med	no	NA	1	b	1	1	1	0	e	NA	a	1	borrow	b	d	khảo cổ dễ sợ, khát vọng sống	yes	c	a	1	Shin, doraemon, conan
4628	15.357	43071	15	9	Female	5.3	0	0	0	1	2	NA	f	Bộ đội	Soldier	Nông dân	Farmer	Labor	40	UnderHi	Nông dân	Farmer	Labor	33	UnderHi	med	no	NA	1	b	1	1	1	0	e	NA	a	1	borrow	b	d	hãy đặt trách nhiệm lên vai, hạt giống tâm hồn	yes	d	a	1	Đắc Nhân Tâm, quà tặng cuộc sống, tiếng anh siêu tốc
4961	7.289	43071	7	8	Female	5.3	0	0	0	3	3	1	b	Công ty	Businessman	Nông dân	Farmer	Labor	45	Hi	Nông dân	Farmer	Labor	43	Hi	med	no	NA	1	a	0	1	1	0	a	NA	a	1	borrow	a	a	Doraemon Cậu bé bút chì	yes	a	a	1	NA
3013	15.66	43071	15	6	Female	5.26	0	0	0	1	2	1	b	Ca sĩ	Singer	Nông dân	Farmer	Labor	38	Hi	Công nhân	Worker	Labor	36	Hi	poor	NA	NA	1	a	0	2	1	0	a	NA	a	1	borrow	b	a	hạt giống tâm hồn, Võ Quảng quê nội	yes	a	a	1	tiếng gọi của hoang dã, hạt giống tâm hồn, Phương pháp nâng cao kỹ năng tập trung cho học sinh
2756	8.148	43076	8	7	Female	5.25	0	0	0	2	3	1	b	NA	NA	Nông dân	Farmer	Labor	NA	NA	Nông dân	Farmer	Labor	NA	NA	med	NA	NA	1	e	1	1	1	1	a	NA	a	1	buy	b	d	Thật thà Lịch sử thế giới	NA	a	a	1	Tình yêu không bằng lời nói Học cách tự vệ 50 tác phẩm văn học
3750	13.288	43073	13	8	Female	5.25	0	0	0	3	3	0	NA	công nhân	Worker	nông dân	Farmer	Labor	43	UnderHi	nông dân	Farmer	Labor	42	UnderHi	med	no	NA	1	f	1	1	2	0	f	khác	a	1	borrow	b	a	truyện kiều truyện cười	yes	d	a	1	truyện cười câu đố
32	26	43075	2	8	Female	5.2	0	0	0	3	3	1	b	công nhân	Worker	làm ruộng	Farmer	Labor	49	UnderHi	làm ruộng	Farmer	Labor	39	UnderHi	med	no	NA	0	a	0	1	1	0	a	NA	a	1	borrow	a	c	Truyện Kiều Đô Rê Mon	yes	b	a	1	Truyện cổ tích nhiều tập Truyện Kiều Nghìn lẻ một đêm
812	11.42	43071	11	6	Female	5.2	0	0	0	2	3	1	b	Thiết kế thời trang	Fashion designer	làm ruộng	Farmer	Labor	40	UnderHi	công nhân	Worker	Labor	41	Hi	rich	no	NA	1	a	0	1	1	0	a	NA	a	1	buy	a	a	Sách tiếng Anh Sách văn học	yes	a	a	1	Sọ Dừa Dưa hấu
2846	16.305	43074	16	7	Male	5.2	0	0	0	2	3	1	c	Công an	Police officer	Nông dân	Farmer	Labor	39	UnderHi	Nông dân	Farmer	Labor	36	UnderHi	med	no	NA	1	b	1	3	1	0	a	NA	a	1	buy	b	a	Sự tích cây khế Thạch sanh	yes	d	a	1	Conan Doraemon 7 viên ngọc rồng
2859	16.318	43074	16	7	Male	5.2	0	0	0	1	2	1	b	Bác sĩ	Doctor	Nông dân	Farmer	Labor	36	UnderHi	Nông dân	Farmer	Labor	34	UnderHi	med	no	NA	1	b	1	3	1	0	d	NA	a	1	buy	b	a	thánh gióng Doraemon	yes	b	a	1	7 viên ngọc rồng Doraemon Hội pháp sư
3718	16.122	6	16	6	Male	5.2	0	0	0	2	2	1	d	lính cứu hỏa	Firefighter	thợ xây	Worker	Labor	35	Hi	thợ xây	Worker	Labor	NA	Hi	med	no	NA	1	a	0	1	1	0	c	NA	a	1	borrow	a	d	dạy trẻ có chí tiến thủ thế giới động vật biển	yes	a	a	1	dạy trẻ có trái tim
4330	3.289	43071	6	6	Female	5.2	0	0	0	1	3	1	b	Thiết kế thời trang	Fashion designer	Thợ xây	Worker	Labor	39	UnderHi	Công nhân	Worker	Labor	33	Hi	med	no	NA	1	c	1	2	NA	1	a	NA	a	1	borrow	a	a	Doraemon Cậu bé bút chì	yes	b	a	1	Lịch sử địa phương Doraemon Nguyễn Nhật Ánh
4623	15.355	43071	15	9	Male	5.2	0	0	0	1	3	1	f	Kỹ sư	Engineer	Nông dân	Farmer	Labor	39	Hi	Nông dân	Farmer	Labor	36	UnderHi	med	yes	6000000	1	f	1	2	1	0	e	NA	a	1	borrow	b	d	hãy đặt trách nhiệm lên vai, quà tặng cuộc sống	yes	d	a	1	quà tặng cuộc sống, hạt giống tâm hồn, máy móc dưới nước
2848	16.307	43074	16	7	Female	5.1	0	0	0	2	3	1	b	Bác sĩ	Doctor	Nông dân	Farmer	Labor	42	Hi	Nông dân	Farmer	Labor	38	UnderHi	med	no	8000000	1	a	0	2	1	0	a	NA	a	1	buy	d	b	Tình mẹ Khoảnh khắc diệu kì	yes	b	a	1	Conan Doraemon Shin
3330	16.56	43074	16	9	Male	5.1	0	0	0	1	2	1	d	sửa chữa ô tô	Repairman	nông dân	Farmer	Labor	43	Hi	nông dân	Farmer	Labor	39	Hi	med	no	NA	1	b	1	1	1	1	e	NA	a	1	buy	a	a	tắt đèn sách dạy nghề	yes	a	a	1	nghệ thuật ứng xử thông minh hạt giống tâm hồn lịch sử việt nam bằng tranh
3376	16.579	43074	16	9	Male	5.1	0	0	0	1	1	1	f	kĩ sư	Engineer	nông dân	Farmer	Labor	39	UnderHi	nông dân	Farmer	Labor	36	UnderHi	rich	no	NA	1	f	1	2	2	0	e	NA	a	1	buy	a	a	những điều cần biết vè trái đất dạy nghề	yes	b	a	1	sách dạy nghề sách dạy nấu ăn sách về sự tiến hóa của con người
3387	16.581	43074	16	9	Male	5.1	0	0	0	3	3	1	f	công nghệ thông tin	Engineer	nông dân	Farmer	Labor	NA	Hi	nông dân	Farmer	Labor	NA	UnderHi	med	no	NA	1	f	1	2	1	0	e	NA	a	1	buy	b	a	tin học kĩ thuật sách dạy nghề	yes	b	a	1	sách học tốt sách kĩ năng sống sách dạy nghề
3473	3.8	43071	6	9	Male	5.1	0	0	0	2	2	1	f	Chủ quán intenet	Businessman	Nông dân	Farmer	Labor	42	NA	Nông dân	Farmer	Labor	42	UnderHi	med	no	NA	1	f	1	1	3	0	e	NA	a	1	borrow	c	b	Đắc nhân tâm Khoa học đời sống	NA	d	a	1	Chí Phèo Giông tố Vợ nhặt
59	6.198	43074	3	9	Male	5	0	0	0	2	2	1	b	Danh nhân	Businessman	Công nhân	Worker	Labor	NA	UnderHi	Công nhân	Worker	Labor	NA	Hi	med	no	NA	1	c	1	2	3	1	b	NA	a	1	buy	b	d	Doraemon Conan	yes	a	a	1	Danh nhân thế giới Tìm hiểu thế giới Người nguyên thủy
64	1.202	43074	3	9	Female	5	0	0	0	2	5	1	e	Người mẫu	Model	Bán hàng	Seller	Labor	41	UnderHi	Bán hàng	Seller	Labor	40	UnderHi	med	no	NA	1	b	1	2	1	0	b	NA	a	1	borrow	d	b	Tìm hiểu về các danh nhân văn hóa thế giới Đọc sách	yes	a	a	1	Doraemon Tìm hiểu trái đất Thế giới loài người nguyên thủy
65	6.203	43074	3	9	Male	5	0	0	0	2	2	1	f	Công nhân	Worker	Bán hàng	Seller	Labor	42	UnderHi	Bán hàng	Seller	Labor	42	UnderHi	med	no	NA	0	b	1	2	1	0	e	NA	a	1	borrow	d	a	Tìm hiểu về các danh nhân văn hóa thế giới Đọc sách loài động vật	no	a	a	1	Doraemon Tìm hiểu trái đất Thế giới loài người nguyên thủy
67	6.205	43074	3	9	Male	5	0	0	0	3	3	1	e	Kiến trúc xây dựng	Architect	Làm ruộng	Farmer	Labor	56	UnderHi	Làm ruộng	Farmer	Labor	55	UnderHi	med	yes	NA	1	b	1	2	2	0	c	NA	a	1	borrow	d	a	Sách Ngữ văn Sách toàn	yes	d	a	1	Sách bài tập hóa học Sách nói về những danh nhân nổi tiếng Sách nói về chuyện vằ văn học
73	6.212	43074	3	9	Male	5	0	0	0	2	2	1	a	Nông dân	Farmer	NA	NA	NA	NA	NA	Giáo viên mầm non	Teacher	Intellectuals	42	NA	med	no	NA	1	e	1	2	1	1	a	NA	a	1	buy	a	a	NA	yes	a	a	1	Truyện tranh Truyện dân gian
75	6.214	43074	3	9	Male	5	0	0	0	3	3	0	d	Công dân	Worker	Làm ruộng	Farmer	Labor	46	UnderHi	Làm ruộng	Farmer	Labor	47	UnderHi	med	no	NA	0	e	1	1	1	1	a	NA	a	1	borrow	b	c	Thần đồng Việt Nam Lịch sử văn học Việt Nam	no	a	a	1	Truyện dân gian Truyện hài Truyện văn học
77	6.216	43074	3	9	Male	5	0	0	0	2	2	1	f	Công nhân viên chức	Public servant	Làm ruộng	Farmer	Labor	42	Hi	Làm ruộng	Farmer	Labor	40	Hi	med	no	NA	1	b	1	2	1	0	a	NA	a	1	borrow	a	a	Truyện tranh Sách danh nhân	no	NA	a	1	Sách văn học Sách tự nhiên sinh học Sách ngoại ngữ
81	6.22	43074	3	9	Female	5	0	0	0	1	2	1	a	Kế toán	Accountant	Làm ruộng	Farmer	Labor	36	UnderHi	Làm ruộng	Farmer	Labor	35	Hi	med	no	NA	1	b	1	2	2	0	b	NA	a	1	borrow	a	a	Sách văn học Truyện văn học	NA	b	a	1	Sách danh nhân Sách phổ biến khoa học Sách dạy nghề
82	6.221	43074	3	9	Male	5	0	0	0	2	2	1	b	Thợ điện	Engineer	Thợ mộc	Worker	Labor	46	Hi	Nhân viên	Employee	Labor	39	Hi	med	no	NA	1	c	1	2	1	1	a	NA	a	1	borrow	b	a	Văn học từ lớp 6 - 9 Doraemon	yes	c	a	1	Vi trùng và thép Khoa học hệ mặt trời Lịch sử thế giới
142	80	43075	2	9	Female	5	0	0	0	1	3	1	b	chưa xác định	NA	làm ruộng	Farmer	Labor	NA	Hi	làm ruộng	Farmer	Labor	NA	Hi	rich	no	NA	1	b	1	2	1	0	NA	NA	a	1	buy	d	a	Truyện dân gian Truyền thuyết	yes	b	a	1	NA
234	4.134	43075	2	6	Male	5	0	0	0	1	2	1	b	công nhân (nghề lái máy xúc)	Worker	Làm thợ	Worker	Labor	36	UnderHi	làm thợ	Worker	Labor	34	UnderHi	med	yes	NA	1	e	1	1	1	1	e	NA	a	1	buy	c	c	Sách GK Toán Sách GK Văn	yes	b	a	1	Đô Rê mon Shin cậu bé bút chì Thám tử
525	9.06	43073	9	6	Male	5	0	0	0	3	3	1	d	Bác sĩ	Doctor	Làm thợ	Worker	Labor	47	UnderHi	làm thợ	Worker	Labor	43	UnderHi	med	no	NA	1	b	1	2	1	0	a	NA	a	1	buy	b	a	kể chuyện thần đồng Hạt giống tâm hồn	yes	b	a	1	Đô rê mon Shin cậu bé bút chì Co nan thám tử lừng danh
668	9.095	43073	9	7	Male	5	0	0	0	2	2	1	b	Công an	Police officer	làm ruộng	Farmer	Labor	45	UnderHi	Công nhân	Worker	Labor	40	UnderHi	med	no	NA	1	b	1	3	2	0	f	Truyện tranh	a	1	borrow	a	d	Lịch sử Việt nam Hạt giống tâm hồn	yes	c	a	1	Nữ sinh Truyện cổ tích việt nam Tôi là beto
674	9.101	43073	9	7	Male	5	0	0	0	2	2	1	f	Bộ đội ( cti bồ đội)	Soldier	làm ruộng	Farmer	Labor	42	UnderHi	Làm ruộng	Farmer	Labor	NA	UnderHi	med	yes	6000000	1	b	1	2	3	0	e	NA	a	1	buy	a	d	Người Ai cập Động đất động trời	yes	c	a	1	Hoang mạc hoang sơ Đại dương khó tưởng tượng ( thương) Con số ma thuật
803	14.24	43071	14	6	Female	5	0	0	0	2	3	1	f	Công ty	Businessman	Làm đá mỹ nghệ	Worker	Labor	32	UnderHi	Làm vôi	Worker	Labor	30	UnderHi	med	no	NA	0	b	1	1	1	0	d	NA	a	1	borrow	d	a	7 viên ngọc rồng Doraemon	yes	a	a	1	Conan 7 viên ngọc rồng
822	9.111	43073	9	7	Female	5	0	0	0	2	2	1	f	công nhân	Worker	làm ruộng	Farmer	Labor	40	UnderHi	Công nhân	Worker	Labor	41	UnderHi	poor	no	NA	1	b	1	1	1	0	f	Truyện tranh	a	1	borrow	a	d	cánh buồm đỏ thắm	yes	a	a	1	Khám phá thế giới Truyện cổ tích việt nam Tình yêu thương
928	11.163	43071	11	8	Male	5	0	0	0	2	2	0	NA	Bác sĩ	Doctor	Nông dân	Farmer	Labor	42	UnderHi	Nông dân	Farmer	Labor	36	UnderHi	med	no	NA	1	b	1	1	NA	0	e	NA	a	1	borrow	d	d	Thám tử lừng danh Conan Doraemon	yes	c	a	1	Thám tử lừng danh Conan Doraemon Tấm Cám
1018	9.129	43073	9	7	Male	5	0	0	0	3	3	1	b	Xăm hình	Tatoo artist	làm ruộng	Farmer	Labor	50	UnderHi	Công nhân	Worker	Labor	48	Hi	med	no	NA	1	e	1	1	1	NA	a	NA	a	1	buy	b	b	Lịch sử Việt nam bằng tranh Tài muốn biết tất cả mọi thứ	yes	c	a	1	Thuyền trưởng đơn vị Việt nam sử lược Núi lửa nóng hơn lửa
1109	14.143	43071	14	9	Male	5	0	0	0	1	2	1	b	Tài xế	Driver	Tự do	Freelancer	Labor	48	Hi	Kinh doanh	Businessman	Labor	43	UnderHi	med	no	NA	1	b	1	2	1	0	a	NA	a	1	borrow	a	a	Thủy hử Hachiko - chú chó đợi chờ	yes	a	a	1	Truyện Kiều Bản án chế độ thực dân Pháp Hạt giống tâm hồn tập 3
1563	9.169	43073	9	7	Female	5	0	0	0	2	3	1	b	NA	NA	Làm ruộng	Farmer	Labor	36	UnderHi	Làm ruộng	Farmer	Labor	37	UnderHi	med	no	NA	1	b	1	1	1	0	a	NA	a	1	borrow	a	d	NA	yes	d	a	1	NA
1640	9.236	43073	9	8	Female	5	0	0	0	1	1	1	a	Công nhân	Worker	Làm ruộng	Farmer	Labor	52	UnderHi	Làm ruộng	Farmer	Labor	49	UnderHi	poor	no	NA	1	c	1	1	1	0	a	NA	a	1	buy	b	c	Truyện ngắn Nam Cao Truyện Kiều	yes	d	a	1	Lòng Mẹ Truyện ngắn Nam Cao Truyện Kiều
1868	2.215	43076	4	8	Male	5	0	0	0	1	2	1	b	Không xác định	NA	Phụ hồ	Worker	Labor	39	UnderHi	Nông dân	Farmer	Labor	43	UnderHi	med	no	NA	1	b	1	3	2	0	d	NA	a	1	buy	b	a	Truyện cổ tích Giới thiệu về lịch sử	NA	c	a	1	Gió lạnh đầu mùa
1878	2.229	43076	4	8	Male	5	0	0	0	1	1	0	f	Nhà sáng chế	Inventor	Công nhân	Worker	Labor	43	Hi	Giáo viên	Teacher	Intellectuals	39	Hi	med	no	NA	1	b	1	1	1	0	c	NA	a	1	borrow	c	d	Thạch Sanh Tây Du ký	yes	d	a	1	NA
1895	2.23	43076	4	8	Male	5	0	0	0	2	2	1	d	Họa sĩ	Painter	Công nhân	Worker	Labor	35	Hi	Công nhân	Worker	Labor	33	Hi	med	no	NA	1	b	1	1	1	0	a	NA	a	1	borrow	b	c	Dế Mèn phiêu lưu kí 7 chiến lược học tập thay đổi tương lai	yes	d	a	1	NA
2067	2.7	43076	4	6	Male	5	0	0	0	3	3	1	f	Bộ đội	Soldier	Nông dân	Farmer	Labor	44	NA	Nông dân	Farmer	Labor	45	NA	med	no	NA	NA	b	1	2	2	0	d	NA	a	1	buy	c	d	Chuyện lạ trong vũ trụ Vũ khí chiến tranh	yes	d	a	1	Do raemon Bảy viên hồng ngọc Na ru tô
2068	2.69	43076	4	6	Male	5	0	0	0	2	2	1	b	Công an	Police officer	Nông dân	Farmer	Labor	47	Hi	Nông dân	Farmer	Labor	36	NA	med	no	NA	1	b	1	1	1	0	d	NA	a	1	buy	a	a	Thám tử lừng danh Co nan Do raemon	yes	a	a	1	Thám tử lừng danh Co nan Cậu bé bút chì Do raemon
2088	2.47	43076	4	6	Female	5	0	0	0	1	1	1	c	Giáo viên	Teacher	Làm thuê	Employee	Labor	33	Hi	Nông dân	Farmer	Labor	33	Hi	rich	no	NA	1	b	1	1	1	1	f	Từ điển	a	1	borrow	c	d	Tình cha ấm áp Quê nội	yes	b	a	1	Từ điển Đồi thơ Cách sống
2090	2.45	42928	4	6	Male	5	0	0	0	2	2	1	d	Giáo viên	Teacher	Thợ xây	Worker	Labor	43	UnderHi	Công nhân	Worker	Labor	37	Hi	med	yes	NA	1	a	0	2	2	0	c	NA	a	1	buy	a	a	Hành trình và thám hiểm vũ trụ Bí quyết thành công	yes	c	a	1	Những chuyện lạ ngoài vũ trụ Tên lửa của tôi
2100	2.33	43076	4	6	Male	5	0	0	0	2	3	0	f	Phi công	Pilot	Thợ xây	Worker	Labor	40	Hi	Thợ may	Worker	Labor	38	Hi	poor	no	NA	1	b	1	1	1	0	d	NA	a	1	borrow	d	a	Chuyện lạ Kĩ thuật thuở ban sơ	yes	d	a	1	Truyện đọc Sách văn Sách tham khảo
2130	2.149	43076	4	7	Male	5	0	0	0	2	2	1	f	Điện tử	Engineer	Thợ xây	Worker	Labor	NA	UnderHi	Nông dân	Farmer	Labor	NA	UnderHi	med	no	NA	0	b	1	1	1	0	f	Doraemon	a	1	borrow	c	d	Doraemon Truyện ma	no	a	a	1	Doraemon Conan Cậu bé bút chì
2133	2.146	43076	4	7	Male	5	0	0	0	3	3	1	a	Bác sĩ	Doctor	Nông dân	Farmer	Labor	49	UnderHi	Nông dân	Farmer	Labor	47	UnderHi	med	no	NA	1	c	1	1	2	0	b	NA	a	1	borrow	b	a	Kĩ năng sống Đừng bao giờ từ bỏ khát vọng	yes	a	a	1	Tôi tài giỏi bạn cũng thế Quà tặng cuộc sống Lịch sử Việt Nam
2137	2.142	43076	4	7	Male	5	0	0	0	3	3	1	a	Thợ xây	Worker	Thợ xây	Worker	Labor	47	UnderHi	Công nhân	Worker	Labor	NA	UnderHi	med	no	NA	1	b	1	1	1	0	f	Truyện tranh	a	1	borrow	a	a	Truyện cười Truyện tranh	yes	NA	a	1	Cậu bé bút chì Doraemon 7 viên ngọc rồng
2260	8.267	43076	8	9	Male	5	0	0	0	1	2	1	f	Internet	Programmer	Nông dân	Farmer	Labor	41	NA	Nông dân	Farmer	Labor	37	NA	med	no	NA	1	f	1	1	NA	0	e	NA	a	1	buy	a	a	Kĩ năng sống Những câu chuyện về tinh thần học hỏi	no	NA	a	1	Doraemon Cậu bé bút chì Tý Quậy
2632	15.34	43071	15	6	Male	5	0	0	0	2	4	1	d	Lái xe ô tô	Driver	Nông dân	Farmer	Labor	40	UnderHi	Nông dân	Farmer	Labor	35	UnderHi	med	no	NA	1	b	1	1	1	0	e	NA	a	1	borrow	c	a	kĩ năng sống dành cho học sinh, tồn tại và thoát hiểm	yes	c	a	1	conan, doraemon, shin - cậu bé bút chì
2647	15.4	43071	15	6	Male	5	0	0	0	3	3	1	f	công an	Police officer	Nông dân	Farmer	Labor	49	UnderHi	Nông dân	Farmer	Labor	47	UnderHi	med	no	NA	1	b	1	1	1	0	c	NA	a	1	borrow	a	a	Các nhà phát minh vĩ đại, hạt giống tâm hồn	yes	c	a	1	doraemon, conan, tắt đèn
2675	15.45	43071	15	6	Female	5	0	0	0	1	3	1	b	Ca sĩ	Singer	Nông dân	Farmer	Labor	50	UnderHi	Công nhân	Worker	Labor	40	Hi	med	no	NA	1	a	0	1	1	0	e	NA	a	1	borrow	a	b	chú bé rắc rối, hạt giống tâm hồn	yes	c	a	1	doraemon, conan, báo nhi đồng
2680	15.5	43071	15	6	Male	5	0	0	0	3	3	1	c	Cầu thủ	Footballer	Nông dân	Farmer	Labor	48	UnderHi	Nông dân	Farmer	Labor	38	UnderHi	med	yes	NA	1	b	1	3	2	0	d	NA	a	1	buy	b	a	tấm lòng cao cả, câu lạc bộ thắp sáng ước mơ	yes	c	a	1	doraemon, conan, shin - cậu bé bút chì
2691	5.11	43075	10	8	Male	5	0	0	0	3	3	1	f	Bác sĩ	Doctor	Đi rắt	NA	Labor	39	Uni	Công nhân	Worker	Labor	38	Uni	med	yes	3000000-4000000	1	b	1	2	1	0	d	NA	a	1	buy	a	a	Doraemon Truyện ngụ ngôn	yes	a	a	1	NA
2805	16.271	43074	16	7	Male	5	0	0	0	2	2	1	d	Bác sĩ	Doctor	Nông dân	Farmer	Labor	37	UnderHi	Nông dân	Farmer	Labor	35	UnderHi	med	no	NA	1	e	1	2	1	0	a	NA	a	1	borrow	a	a	Tôi muốn biết cái gì A cư và những người bạn	yes	c	a	1	Tôi muốn biết như thế nào Tôi muốn biết vì sao Những nhà phát minh vĩ đại
2815	16.281	43074	16	7	Male	5	0	0	0	3	3	1	c	Công nhân	Worker	Thợ xây	Worker	Labor	NA	UnderHi	Công nhân	Worker	Labor	NA	UnderHi	med	no	NA	0	a	0	2	2	0	a	NA	a	1	buy	a	a	Các nhà phát minh vĩ đại Cuộc đời của những danh nhân	yes	d	a	1	Chiến binh cầu vồng Học để làm gì Kì quan thế giới
2821	15.54	43071	15	6	Male	5	0	0	0	3	3	1	d	Lái xe	Driver	Nông dân	Farmer	Labor	48	UnderHi	Nông dân	Farmer	Labor	45	UnderHi	med	no	NA	1	b	1	2	1	0	e	NA	a	1	borrow	a	a	Tấm lòng cao cả, bút xiềng xích	yes	b	a	1	Đom đóm, Tắt đèn, Shin cậu bé bút chì
2844	16.303	43074	16	7	Female	5	0	0	0	1	1	1	b	Bác sĩ	Doctor	Thợ xây	Worker	Labor	33	UnderHi	Nông dân	Farmer	Labor	36	Hi	med	no	NA	1	a	0	2	1	NA	a	NA	a	1	buy	a	b	Tình chị em Ngữ pháp tiếng Anh	yes	a	a	1	7 viên ngọc rồng Học cách làm người 10 điều bí ẩn
2964	8.89	43076	8	6	Male	5	0	0	0	1	2	1	c	Công nhân	Worker	Thợ xây	Worker	Labor	41	UnderHi	Nông dân	Farmer	Labor	39	UnderHi	poor	NA	NA	1	b	1	1	1	0	e	NA	a	1	borrow	b	d	Khoa học tự nhiên Ba chú lợn con	yes	c	a	1	Học trò cười Sáng chế tài ba Chế tạo
3154	16.463	43074	16	8	Male	5	0	0	0	1	2	1	d	Công an	Police officer	Xây dựng	Worker	Labor	42	NA	Không xác định	NA	Labor	37	Uni	rich	no	NA	1	e	1	2	NA	0	a	NA	a	1	borrow	d	a	Những ngày thơ ấu Lịch sử Việt Nam	yes	a	a	1	Những ngày thơ ấu Lịch sử Việt nam Học kĩ năng để thành công
3156	16.465	43074	16	8	Male	5	0	0	0	2	2	NA	d	Thủ tướng	Politician	Nông dân	Farmer	Labor	43	UnderHi	Nông dân	Farmer	Labor	39	UnderHi	med	no	NA	0	b	1	1	1	1	c	NA	a	1	borrow	c	b	Danh nhân thế giới Khoa học tự nhiên	yes	c	a	1	Toán học diệu kì Xứ sở của những con số Danh ngôn thế giới
3159	16.468	43074	2	8	Male	5	0	0	0	2	2	1	b	Nhà báo	Journalist	Nghề tự do	Freelancer	Labor	44	UnderHi	Nghề tự do	Freelancer	Labor	37	UnderHi	med	no	NA	1	e	1	1	1	0	d	NA	a	1	borrow	d	c	Những ngày thơ ấu Bạn có thể thay đổi thế giới	yes	d	a	1	Những điều lí thú về thiên nhiên Cổ tích Việt Nam Conan
3266	03,42	43071	6	9	Male	5	0	0	0	1	2	1	f	Ca sĩ	Singer	Công Nhân	Worker	Labor	37	UnderHi	Công nhân	Worker	Labor	33	UnderHi	poor	no	NA	1	b	1	1	1	NA	e	NA	a	1	buy	c	d	nam Cao Conan	no	d	a	1	Cổ tích Truyện Kiều Conan
3304	16.536	43074	16	9	Female	5	0	0	0	1	3	1	b	bác sĩ	Doctor	thợ xây	Worker	Labor	40	NA	giáo viên	Teacher	Intellectuals	36	UnderHi	med	no	NA	1	b	1	1	1	0	a	NA	a	1	buy	a	b	shin doraemon	yes	d	a	1	sherlock homles conan kĩ năng sinh tồn
3316	16.548	43074	16	9	Male	5	0	0	0	1	2	1	a	kĩ sư	Engineer	công nhân	Worker	Labor	37	Hi	công nhân	Worker	Labor	36	Hi	med	no	NA	1	a	0	2	NA	1	d	NA	a	1	buy	d	c	hạt giống tâm hồn nghệ thuật và đời sống	yes	d	a	1	kính vạn hoa robinson ngoài đảo hoang conan
3322	16.554	43074	16	9	Female	5	0	0	0	1	3	1	b	công nhân	Worker	thợ xây	Worker	Labor	35	NA	công nhân	Worker	Labor	35	NA	rich	no	NA	1	c	1	2	2	0	a	NA	a	1	borrow	d	d	truyện kiều lịch sử việt nam	no	NA	a	1	thép đã tôi thế ấy tuổi thơ dữ dội sherlock holmes
3323	16.555	43074	16	9	Male	5	0	0	0	2	2	1	c	công nhân	Worker	nông dân	Farmer	Labor	45	Hi	nông dân	Farmer	Labor	46	Hi	med	NA	4000000	1	a	0	2	1	NA	e	NA	a	1	borrow	a	a	lịch sử việt nam doraemon	NA	a	a	1	việc làm ngô tất tố tắt đèn lão hạc
3354	3.66	43071	6	9	Female	5	0	0	0	1	3	1	e	Lái máy xúc	Driver	Nông dân	Farmer	Labor	36	UnderHi	Nông dân	Farmer	Labor	36	UnderHi	med	no	NA	1	c	1	2	1	0	e	NA	a	1	borrow	a	a	Khát vọng sống Trai nước nam làm gì	yes	a	a	1	Đầu súng trăng treo Cậu bé bút chì Dế mèn
3380	16.73	43074	16	6	Female	5	0	0	0	2	1	1	e	giáo viên	Teacher	xây dựng	Worker	Labor	43	Hi	công nhân	Worker	Labor	40	Hi	med	no	NA	1	a	0	2	2	0	a	NA	a	1	borrow	a	a	100 phát minh về lịch sử gương sáng người xưa	yes	a	a	1	truyện văn học
3393	16.8	43074	16	6	Male	5	0	0	0	2	3	1	NA	bác sĩ	Doctor	xây dựng	Worker	Labor	35	Hi	làm ruộng	Farmer	Labor	34	Hi	med	no	NA	1	a	0	1	1	0	e	NA	a	1	buy	b	b	tai nạn giao thông ở nơi công cộng cho và nhận	yes	c	a	1	100 phát minh mới nhất
3402	16.9	43074	16	6	Male	5	0	0	0	2	2	1	b	bộ đội	Soldier	xây dựng	Worker	Labor	41	Hi	làm ruộng	Farmer	Labor	41	Hi	med	no	NA	1	c	1	1	1	0	e	NA	a	1	borrow	a	a	tấm cám bí ẩn tự nhiên vũ trụ	yes	a	a	1	sự tích dưa hấu
3562	15.164	43071	15	7	Female	5	0	0	0	1	4	1	NA	Bác sĩ	Doctor	Nông dân	Farmer	Labor	39	Hi	Nông dân	Farmer	Labor	36	Hi	med	no	NA	1	a	0	2	1	0	c	NA	a	1	borrow	b	a	sách về vũ trụ, sách sinh học	yes	b	a	1	kỹ năng sống, thiên nhiên, khoa học kĩ thuật
3579	3.13	43071	6	8	Male	5	0	0	0	3	3	1	f	Kĩ sư	Engineer	Thợ xây	Worker	Labor	48	NA	Nông dân	Farmer	Labor	43	NA	med	no	NA	1	a	0	2	1	0	c	NA	a	1	borrow	d	c	Doraemon Conan	NA	b	a	1	hướng tới tương lai không gian vũ trụ Phát minh vĩ đại
3660	15.176	43071	15	7	Male	5	0	0	0	1	2	1	f	Bác sĩ	Doctor	lái xe ô tô	Driver	Labor	37	Uni	Giày da	Worker	Labor	38	Uni	med	yes	3000000	1	a	0	1	1	NA	a	NA	a	1	borrow	a	a	khoa học vũ trụ, những điều kỳ lạ	yes	b	a	1	những điều kỳ lạ, hạt giống tâm hồn, nước Đại Việt
3671	15.178	43071	15	7	Female	5	0	0	0	1	2	1	b	Bác sĩ	Doctor	Làm mộc	Worker	Labor	32	PostGrad	Thợ may	Worker	Labor	30	Hi	med	no	NA	1	a	0	2	2	1	a	NA	a	1	borrow	a	a	tình cha ấm áp, kỹ năng sống dành cho học sinh	yes	NA	a	1	thật thà, cậu bé chăn cừu, cậu bé thông minh
3791	16.127	43074	16	6	Male	5	0	0	0	2	3	1	b	công an	Police officer	thợ xây	Worker	Labor	35	NA	công nhân	Worker	Labor	30	UnderHi	med	yes	4000000-5000000	1	f	1	2	2	1	a	NA	a	1	buy	b	d	truyện văn học	yes	a	a	1	gieo mầm tính cách tự tin gieo mầm tính cách 100 truyện cổ tích
4089	10.167	43075	5	7	Male	5	0	0	0	1	3	0	d	bác sĩ	Doctor	xây dựng	Worker	Labor	38	NA	công nhân	Worker	Labor	35	NA	med	yes	4000000	1	b	1	2	2	0	d	NA	a	1	borrow	d	a	ông già và biển cả hạt giống tương lai	yes	c	a	1	ông già và biển cả thế giới động vật hạt giống tương lai
4104	10.182	43075	5	7	Female	5	0	0	0	1	2	1	b	họa sĩ	Painter	hàn	Worker	Labor	36	Hi	công nhân	Worker	Labor	34	Hi	med	no	NA	1	c	1	3	2	0	a	NA	a	1	borrow	d	a	thế giới động vật hoàng tử bé	yes	d	a	1	doraemon conan pokemon
4105	10.183	43075	5	7	Male	5	0	0	0	1	2	1	b	bác sĩ	Doctor	nông dân	Farmer	Labor	NA	NA	công nhân	Worker	Labor	NA	NA	med	no	NA	1	e	1	3	2	0	a	NA	a	1	borrow	a	a	NA	yes	c	a	1	thời đại bùng nổ conan naruto
4114	10.192	43075	5	7	Male	5	0	0	0	1	2	1	c	giáo viên	Teacher	nông dân	Farmer	Labor	33	UnderHi	nông dân	Farmer	Labor	33	Uni	med	yes	45000000	1	a	0	2	2	0	f	sách lịch sử	a	1	borrow	a	a	ngụ ngôn cổ điển phương tây thế giới động vật	yes	a	a	1	thật thà hoàng tử bé học cách làm việc
4121	10.199	43076	5	7	Male	5	0	0	0	6	6	1	d	công an	Police officer	nông dân	Farmer	Labor	48	UnderHi	nông dân	Farmer	Labor	45	UnderHi	poor	no	NA	1	b	1	1	1	0	d	NA	a	1	borrow	d	d	thế giới động vật kịch sử việt nam	yes	d	a	1	doraemon truyện kiều tấm cám
4236	10.239		5	7	Male	5	0	0	0	0	0	NA	NA	lái máy súc	Driver	nông dân	Farmer	Labor	NA	NA	nông dân	Farmer	Labor	NA	NA	med	no	10000000	1	b	1	2	NA	0	e	NA	a	1	borrow	d	a	doraemon cây bút thần	yes	a	a	1	doraemon cây bút thần
4254	10.257		5	7	Male	5	0	0	0	1	3	1	e	nhà bác học	Scientist	nông dân	Farmer	Labor	37	Hi	công nhân	Worker	Labor	34	UnderHi	rich	no	NA	1	e	1	2	2	0	d	NA	a	1	buy	b	d	ouliver du kí mẹ tôi	yes	a	a	1	trần hoài dương phạm hổ kĩ năng sống
4326	3.285	43071	6	6	Male	5	0	0	0	1	1	1	f	Kĩ sư	Engineer	Thợ hàn	Worker	Labor	38	UnderHi	Nông dân	Farmer	Labor	32	UnderHi	med	no	NA	1	a	0	2	2	1	c	NA	a	1	borrow	a	a	Khám phá thế giới động vật Hướng dẫn đá bóng	yes	c	a	1	Chơi bóng rổ Thế giới cá heo Chơi bóng bàn
4346	3.305	43071	6	6	Female	5	0	0	0	1	2	1	b	Công nhân	Worker	Công Nhân	Worker	Labor	38	UnderHi	Công nhân	Worker	Labor	33	UnderHi	med	no	NA	1	c	1	2	1	1	a	NA	a	1	borrow	a	a	Văn học Cổ tích	yes	b	a	1	Toán học Văn học Khám phá thế giới
4384	10.349	43074	5	8	Male	5	0	0	0	3	4	1	NA	ca sĩ	Singer	nông dân	Farmer	Labor	43	UnderHi	nông dân	Farmer	Labor	40	NA	med	NA	NA	0	NA	1	1	2	NA	a	NA	a	1	buy	a	a	học ăn học nói học gói học mở vươtk lên chính mình	yes	b	a	1	NA
4527	10.436	43074	5	9	Male	5	0	0	0	0	0	1	e	công nhân	Worker	không xác định	NA	NA	NA	NA	nông dân	Farmer	Labor	NA	UnderHi	poor	no	NA	1	f	1	1	1	0	e	NA	a	1	borrow	d	d	khoa học và cuộc sống giai thoại về các vị thần	yes	b	a	1	NA
4530	10.439	43074	5	9	Male	5	0	0	0	2	2	1	f	sửa chữa	Worker	nông dân	Farmer	Labor	39	UnderHi	nông dân	Farmer	Labor	40	UnderHi	poor	no	NA	1	b	1	2	2	0	d	NA	a	1	borrow	a	a	ngữ pháp tiếng anh thiên nhiên hoang dã	yes	a	a	1	truyện kiều doraemon tắt đèn
4563	10.449	43074	5	9	Male	5	0	0	0	1	2	1	e	thợ hàn	Worker	nông dân	Farmer	Labor	NA	UnderHi	công nhân	Worker	Labor	NA	UnderHi	med	no	NA	1	f	1	1	1	1	e	NA	a	1	borrow	b	a	ngữ pháp tiếng anh 10 điều tạo nên số phận	yes	c	a	1	triệu kiều tắt đèn giữa trong trời xanh
4591	15.339	43071	15	9	Male	5	0	0	0	1	2	1	f	NA	NA	Nông dân	Farmer	Labor	41	UnderHi	Nông dân	Farmer	Labor	39	UnderHi	med	no	NA	1	f	1	1	1	0	d	NA	a	1	borrow	b	d	Truyện Kiều, chị Dậu	yes	a	a	1	NA
4617	15.35	43071	15	9	Male	5	0	0	0	1	1	0	f	Kĩ sư	Engineer	Nông dân	Farmer	Labor	45	Hi	Nông dân	Farmer	Labor	40	Hi	med	no	NA	1	f	1	1	1	1	b	NA	a	1	borrow	b	d	khoa học kỹ thuật, bạn của nhà nông	yes	b	a	1	NA
4687	15.385	43071	15	9	Male	5	0	0	0	2	3	1	f	Kinh doanh	Businessman	Nông dân	Farmer	Labor	40	UnderHi	Nông dân	Farmer	Labor	38	UnderHi	med	no	NA	1	b	1	2	1	0	e	NA	a	1	borrow	d	d	conan, doraemon	yes	a	a	1	Chiến tranh và hòa bình, tập truyện của Ngô Tất Tố, chí phèo
4730	10.507		5	9	Male	5	0	0	0	1	3	1	NA	lái máy xúc	Driver	nông dân	Farmer	Labor	35	NA	công nhân	Worker	Labor	35	NA	med	NA	4000000	1	c	1	1	1	0	e	NA	a	1	borrow	NA	NA	nguyễn nhật ánh làng	yes	d	a	1	sông đông êm đềm mùa hoa thước phiện cuối cùng lịch sử bằng tranh
4734	10.511		5	9	Male	5	0	0	0	2	3	NA	f	công an	Police officer	công nhân	Worker	Labor	43	UnderHi	công nhân	Worker	Labor	40	NA	med	NA	NA	NA	e	1	1	1	1	e	NA	a	1	buy	c	a	doraemon những phát minh quái quỷ	yes	a	a	1	conan chiến tranh và hòa bình mùa hoa thuốc phiện cuối cùng
4747	10.522		5	9	Male	5	0	0	0	1	3	NA	f	thợ điện	Engineer	nông dân	Farmer	Labor	38	UnderHi	nông dân	Farmer	Labor	35	NA	poor	NA	3000000	1	a	0	2	NA	0	a	NA	a	1	borrow	d	d	lịch sử việt nam kì vọng vào những chuyện không thành	yes	a	a	1	chiến tranh và hòa bình đức nhân tâm thép đã tôi thế ấy
1257	1.12	43077	1	8	Male	4.9	0	1	0	2	2	1	f	Thợ máy nông nghiệp	Engineer	Nông dân	Farmer	Labor	55	UnderHi	Nông dân	Farmer	Labor	52	UnderHi	poor	no	NA	1	e	1	1	1	0	e	NA	a	1	borrow	a	d	Thám tử lừng danh Conan Doraemon	yes	b	a	1	Thám tử lừng danh Conan Doraemon Cậu bé bút chì
2831	16.292	43074	16	7	Female	4.9	0	1	0	3	3	1	b	Bác sĩ	Doctor	Nông dân	Farmer	Labor	42	UnderHi	Nông dân	Farmer	Labor	46	Hi	med	no	NA	1	a	0	1	1	0	a	NA	a	1	buy	a	a	Doraemon Truyện cà rốt, trứng, cà phê	yes	b	a	1	Búp tre xanh Hạt giống tâm hồn Khoảnh khắc kì diệu
3095	16.428	43074	16	8	Male	4.9	0	1	0	2	2	1	e	Nông dân	Farmer	Thợ xây	Worker	Labor	39	UnderHi	Nông dân	Farmer	Labor	36	UnderHi	med	no	NA	1	b	1	2	2	NA	f	Truyện tranh	a	1	buy	b	d	Conan Doraemon	yes	a	a	1	Conan Shin Doraemon
772	11.58	43071	11	6	Female	4.8	0	1	0	1	0	1	a	Bác sĩ	Doctor	Làm ruộng	Farmer	Labor	37	UnderHi	Công nhân	Worker	Labor	30	UnderHi	poor	yes	NA	1	e	1	2	2	0	c	NA	a	1	buy	a	a	Conan Doremon	yes	b	a	1	Bao công xử án Bảy viên ngọc rồng Shin cậu bé bút chì
1286	1.179	43077	1	9	Female	4.8	0	1	0	1	2	1	b	Thợ may	Worker	Nông dân	Farmer	Labor	37	UnderHi	Nông dân	Farmer	Labor	39	UnderHi	med	no	NA	1	b	1	1	2	0	c	NA	a	1	buy	a	a	Tình yêu bất tận của người mẹ Tư duy sáng tạo	yes	b	a	1	An toàn giao thông Lịch sử Việt Nam Toán học
1294	1.187	43077	1	9	Male	4.8	0	1	0	1	0	1	f	Kiến trúc sư	Architect	Nông dân	Farmer	Labor	44	UnderHi	Nông dân	Farmer	Labor	42	UnderHi	poor	no	NA	0	c	1	2	1	0	e	NA	a	1	borrow	a	b	Kĩ năng sống Thám tử lừng danh Conan	yes	a	a	1	Truyện Kiều Cổ tích Việt Nam Doraemon
2521	16.45	43074	16	6	Female	4.8	0	1	0	1	2	1	a	giáo viên dạy văn	Teacher	làm ruộng	Farmer	Labor	42	NA	làm ruộng	Farmer	Labor	40	UnderHi	med	no	NA	1	a	0	1	1	0	a	NA	a	1	buy	a	a	quà tặng cuộc sống tý quậy	yes	a	a	1	shin cậu bé bút chì thám tử lừng danh conan doremon chú mèo máy đến từ tương lai
2851	16.31	43074	16	7	Male	4.8	0	1	0	3	3	NA	NA	Ca sĩ	Singer	Nông dân	Farmer	Labor	40	UnderHi	Nông dân	Farmer	Labor	38	UnderHi	med	no	NA	1	b	1	1	1	0	e	NA	a	1	borrow	d	NA	Thánh gióng Conan	yes	d	a	1	7 viên ngọc rồng Conan Truyện tình cha
3348	16.571	43074	16	9	Male	4.8	0	1	0	1	2	0	NA	chủ tịch nước	Politician	nông dân	Farmer	Labor	35	UnderHi	nông dân	Farmer	Labor	36	UnderHi	med	no	NA	0	b	1	1	1	0	e	NA	a	1	borrow	a	d	hướng dẫn nghề khoa học thông tin	yes	d	a	1	sách nội trợ truyện văn học sách danh nhân
4151	3.223	43071	6	7	Male	4.8	0	1	0	2	2	1	f	Tài xế	Driver	Nông dân	Farmer	Labor	46	NA	Nông dân	Farmer	Labor	44	NA	med	NA	NA	1	c	1	1	1	1	c	NA	a	1	buy	b	c	10 vạn câu hỏi vì sao	yes	b	a	1	NA
2566	13.64	43073	13	6	Female	4.7	0	1	0	1	4	1	f	Bác sĩ	Doctor	Lái xe	Driver	Labor	30	Hi	Nông dân	Farmer	Labor	31	UnderHi	med	no	NA	1	a	0	2	NA	0	d	NA	a	1	borrow	a	a	những câu đố tú vị những chuyện liên quan đến bài học	yes	b	a	1	bài học lý thú nhất
4590	10.459	43074	5	9	Female	4.7	0	1	0	2	2	NA	e	không xác định	NA	nông dân	Farmer	Labor	55	UnderHi	nông dân	Farmer	Labor	53	UnderHi	poor	no	NA	1	b	1	1	1	0	a	NA	a	1	borrow	d	NA	kiên trì 10 điều tạo nên số phận	no	NA	a	1	NA
604	11.18	43071	11	8	Male	4.6	0	1	0	2	3	1	e	viết tư pháp	Legislator	làm ruộng	Farmer	Labor	50	Hi	làm ruộng	Farmer	Labor	45	Hi	med	no	NA	1	b	1	1	1	0	f	Lịch sử Việt Nam	a	1	borrow	a	a	Chàng ngốc học khôn Chẫu chàng, cóc tía, và cư dân xóm bờ ao	yes	d	a	1	Chuyện cổ tích Tấm Cám Đố Vui
2583	13.72	43073	13	6	Male	4.6	0	1	0	1	3	1	a	Công an	Police officer	Thợ xây	Worker	Labor	38	Hi	Công nhân	Worker	Labor	34	Hi	med	yes	4000000-5000000	1	b	1	1	1	1	f	truyện tranh	a	1	buy	a	a	văn học toán học	yes	d	a	1	shin cậu bé bút chì doraemon ô long viện
769	11.55	43071	11	6	Male	4.5	0	1	0	1	2	1	f	họa sĩ	Painter	Thợ xây	Worker	Labor	40	Uni	Thủy nông	Farmer	Labor	37	Uni	rich	yes	2000000	1	b	1	2	2	0	d	NA	a	1	borrow	a	d	Conan Doraemon	yes	d	a	1	Tiếng gọi hoang dã Truyện có tranh ảnh Luffy đảo hải tặc
904	11.98	43071	11	7	Male	4.5	0	1	0	1	3	1	f	Không xác định	NA	Thợ xây	Worker	Labor	40	UnderHi	Nông dân	Farmer	Labor	38	UnderHi	med	no	NA	1	f	1	1	1	0	d	NA	a	1	buy	b	d	Khám phá thiên nhiên	no	d	a	1	10 vạn câu hỏi lí thú
916	11.151	43071	11	8	Male	4.5	0	1	0	5	5	1	e	Cầu thủ	Footballer	Nông dân	Farmer	Labor	53	UnderHi	Nông dân	Farmer	Labor	53	UnderHi	med	no	NA	1	b	1	1	1	0	a	NA	a	1	borrow	b	c	Doraemon Thám tử lừng danh Conan	yes	c	a	1	Doraemon Thám tử lừng danh Conan Tấm Cám
1022	9.123	43073	9	7	Female	4.5	0	1	0	1	3	1	b	Bác sĩ	Doctor	Làm thợ	Worker	Labor	36	UnderHi	Công nhân	Worker	Labor	34	UnderHi	med	no	NA	1	a	0	1	1	NA	a	NA	a	1	gift	b	b	Sách Văn học Sách 7 chiến lược thay đổi tương lai	yes	a	a	1	Việt nam lịch sử Cách buồm đỏ thắm Bí mật cơ thể
1070	14.104	43071	14	8	Male	4.5	0	1	0	1	0	1	b	Bác sĩ	Doctor	Tự do	Freelancer	Labor	37	UnderHi	Công nhân	Worker	Labor	36	UnderHi	rich	no	NA	1	f	1	1	1	1	a	NA	a	1	borrow	a	a	Truyện về các vị vua Hùng Việt Nam Không gia đình	yes	a	a	1	Chí Phèo Thằng quậy Chị Dậu
1097	14.131	43071	14	8	Female	4.5	0	1	0	2	2	1	d	Thợ làm tóc	Barber	Nông dân	Farmer	Labor	50	UnderHi	Bán thuốc Bắc	Seller	Labor	51	Hi	med	no	NA	1	b	1	2	2	0	e	NA	a	1	borrow	a	a	Kĩ năng cuộc sống Hạt giống mầm non	yes	a	a	1	Cậu bé bút chì Doraemon Anh em nhà Dalton
2638	15.37	43071	15	6	Female	4.5	0	1	0	2	2	1	d	Bác sĩ	Doctor	Nông dân	Farmer	Labor	40	UnderHi	Nông dân	Farmer	Labor	40	UnderHi	poor	no	NA	1	a	0	1	1	0	d	NA	a	1	gift	b	a	quà tặng cuộc sống, không gia đình	yes	d	a	1	doraemon, thắp sáng ước mơ, shin - cậu bé bút chì
2640	15.38	43071	15	6	Male	4.5	0	1	0	4	4	1	e	Bác sĩ	Doctor	Nông dân	Farmer	Labor	55	UnderHi	Nông dân	Farmer	Labor	54	UnderHi	med	no	NA	1	a	0	1	1	0	d	NA	a	1	borrow	a	a	các nhà phát minh vĩ đại, thời đại bùng nổ ý tưởng	yes	c	a	1	doraemon, conan, bảy viên ngọc rồng
2836	15.59	43071	15	6	Male	4.5	0	1	0	2	2	1	c	Bác sĩ	Doctor	Nông dân	Farmer	Labor	45	UnderHi	Nông dân	Farmer	Labor	42	UnderHi	med	no	NA	1	b	1	1	2	0	b	NA	a	1	buy	a	b	Võ quang quê nội	yes	c	a	1	doraemon, conan, naruto
3170	15.75	43071	15	6	Female	4.5	0	1	0	2	3	1	b	Bác sĩ	Doctor	Công nhân	Worker	Labor	45	Hi	Công nhân	Worker	Labor	33	Hi	med	no	NA	1	b	1	1	1	0	a	NA	a	1	buy	a	b	Câu lạc bộ thắp sáng ước mơ, hạt giống tâm hồn 3	yes	a	a	1	Conan, doraemon, shin
3171	16.473	43074	16	8	Male	4.5	0	1	0	2	4	1	f	Thợ cắt tóc	Barber	Nghề tự do	Freelancer	Labor	45	Hi	Nghề tự do	Freelancer	Labor	30	UnderHi	rich	no	NA	1	b	1	3	2	1	e	NA	a	1	buy	a	d	Tôi tài giỏi bạn cũng thế Chìa khóa vàng	NA	a	a	1	Cổ tích Việt Nam Đố vui dân gian Khám phá động vật
3227	16.483	43074	16	8	Male	4.5	0	1	0	1	2	1	d	sửa chữa điện tử	Worker	thợ xây	Worker	Labor	36	UnderHi	công nhân	Worker	Labor	34	UnderHi	med	no	NA	0	e	1	1	1	0	e	NA	a	1	buy	d	d	hạt giống tâm hồn danh nhân thế giới	no	a	a	1	hạt giống tâm hồn danh nhân thế giới 100 truyện cổ tích thế giới
3337	16.565	43074	16	9	Male	4.5	0	1	0	2	3	NA	f	không xác định	NA	nông dân	Farmer	Labor	44	UnderHi	nông dân	Farmer	Labor	42	UnderHi	med	no	NA	1	c	1	1	1	1	e	NA	a	1	borrow	NA	d	năng lượng mặt trời tắt đèn	yes	d	a	1	thông tin về trái đất tráng sĩ cao thắng lịch sử việt nam
3341	16.567	43074	16	9	Female	4.5	0	1	0	0	0	1	b	bác sĩ	Doctor	nông dân	Farmer	Labor	43	UnderHi	nông dân	Farmer	Labor	42	UnderHi	poor	no	NA	1	f	1	2	NA	0	a	NA	a	1	buy	d	a	lịch sử việt nam giai thoại các tác giả văn chương việt nam	yes	a	a	1	sách dạy nấu ăn các văn hóa nổi tiếng trên thế giới sách dạy tiếng anh
3424	16.102	43074	16	6	Male	4.5	0	1	0	2	2	NA	NA	NA	NA	làm ruộng	Farmer	Labor	36	Hi	làm ruộng	Farmer	Labor	34	UnderHi	med	NA	NA	NA	b	1	1	1	NA	a	NA	a	1	buy	a	d	NA	yes	b	a	1	NA
3567	3.127	43071	6	8	Male	4.5	0	1	0	2	2	0	f	Điện tử	Engineer	Thợ xây	Worker	Labor	NA	NA	Giáo viên	Teacher	Intellectuals	NA	NA	NA	no	NA	1	b	1	2	2	0	d	NA	a	1	buy	a	c	Dragon ball Conan	yes	b	a	1	Mỗi ngày chọn một niềm vui Khát vọng sống bài học vô giá
3583	15.175	43071	15	7	Male	4.5	0	1	0	3	3	1	d	Thợ may	Worker	Nông dân	Farmer	Labor	39	UnderHi	Công nhân	Worker	Labor	35	Hi	med	NA	NA	1	e	1	1	1	NA	a	NA	a	1	borrow	a	NA	khoa học vũ trụ, hạt giống tâm hồn	yes	NA	a	1	nước Đại Việt, Hạt giống tâm hồn, khoa học vũ trụ
3614	16.107	43074	16	6	Female	4.5	0	1	0	1	2	1	b	giáo viên	Teacher	thợ xây	Worker	Labor	34	UnderHi	làm ruộng	Farmer	Labor	NA	UnderHi	med	yes	NA	1	a	0	2	3	NA	a	NA	a	1	buy	a	c	nụ cười nước anh danh ngôn cuộc sống	yes	a	a	1	thật thà nghiên cứu văn học dũng cảm, can đảm
3792	16.128	43074	16	6	Male	4.5	0	1	0	1	2	1	f	bác sĩ	Doctor	làm ruộng	Farmer	Labor	40	Hi	bán quần áo	Seller	Labor	35	Hi	med	no	NA	1	b	1	1	1	0	c	NA	a	1	borrow	d	c	động vật biển khám phá rừng	yes	a	a	1	conan thám tử lừng danh shin cậu bé bút chì doraemon chú mèo máy đến từ tương lai
4238	10.241		5	7	Male	4.5	0	1	0	1	2	NA	e	bác sĩ	Doctor	nông dân	Farmer	Labor	41	PostGrad	nông dân	Farmer	Labor	40	PostGrad	poor	yes	4000000	1	a	0	1	1	0	a	NA	a	1	borrow	a	a	doraemon conan	NA	a	a	1	conan doraemon phạm hổ
4639	10.469	43074	5	9	Male	4.5	0	1	0	1	3	1	f	không xác định	NA	nông dân	Farmer	Labor	35	UnderHi	nông dân	Farmer	Labor	34	UnderHi	NA	no	NA	0	a	0	1	3	0	a	NA	a	1	borrow	d	a	chìa khóa vàng xung quanh phép quay	yes	c	a	1	NA
4715	10.492	43074	5	9	Male	4.5	0	1	0	4	4	1	a	thợ mộc	Worker	nông dân	Farmer	Labor	47	UnderHi	nông dân	Farmer	Labor	42	UnderHi	med	no	NA	0	f	1	1	1	0	e	NA	a	1	borrow	a	a	thi nhân việt nam đắc nhân tâm	yes	b	a	1	tôn sư trọng đạo doraemon trai ngước nam làm gì
4738	10.515		5	9	Male	4.5	0	1	0	2	2	1	c	tài xế	Driver	nông dân	Farmer	Labor	40	NA	nông dân	Farmer	Labor	39	NA	poor	NA	NA	NA	b	1	1	1	1	d	NA	a	1	borrow	b	d	gia công kim loại doraemon	NA	NA	a	1	chiến tranh và hòa bình đắc nhân tâm doraemon
4741	10.518		5	9	Male	4.5	0	1	0	2	0	1	f	bác sĩ	Doctor	nông dân	Farmer	Labor	NA	NA	nông dân	Farmer	Labor	NA	NA	rich	no	NA	1	b	1	1	1	0	e	NA	a	1	borrow	c	d	doraemon sách văn học	NA	d	a	1	doraemon sông đông êm đềm
63	6.201	43074	3	9	Male	4.3	0	1	0	4	4	1	f	Lái máy	Driver	Làm ruộng	Farmer	Labor	44	UnderHi	Làm ruộng	Farmer	Labor	45	UnderHi	med	yes	NA	1	f	1	1	1	1	c	NA	a	1	borrow	d	c	Doraemon Côn trùng	yes	a	a	1	Thế giới động vật Doraemon Thực vật
775	11.61	43071	11	6	Female	4.3	0	1	0	2	2	1	b	Chưa xác định	NA	Làm ruộng	Farmer	Labor	39	UnderHi	Công nhân	Worker	Labor	35	UnderHi	med	no	NA	1	b	1	2	2	1	a	NA	a	1	borrow	a	d	Doraemon Quà tặng cuộc sống	yes	b	a	1	Mãi giữ những trang lưu bút Sự tích quả dưa hấu Nàng bạch tuyết và bảy chú lùn
3568	3.128	43071	6	8	Male	4.3	0	1	0	2	2	NA	f	Tài xế	Driver	Nông dân	Farmer	Labor	NA	UnderHi	công ty	Businessman	Labor	NA	Hi	med	yes	6000000	1	b	1	1	2	NA	c	NA	a	1	buy	a	d	Kĩ năng sống Sống bằng cả trái tim	NA	b	a	1	Tình yêu bất tận của mẹ Chắp cánh yêu thương Hành trang cuộc sống
4231	10.234	43074	5	7	Male	4.3	0	1	0	2	2	1	a	công an	Police officer	nông dân	Farmer	Labor	43	UnderHi	nông dân	Farmer	Labor	64	UnderHi	poor	no	1000000	1	b	1	1	1	0	b	NA	a	1	buy	a	b	lịch sử việt nam doraemon	yes	b	a	1	mặt gương tây hồ bài tập số học và đại số bài tập hình học chon lọc
4308	3.267	43071	6	6	Female	4.3	0	1	0	1	2	1	d	Ca sĩ	Singer	Nông dân	Farmer	Labor	41	Hi	Nông dân	Farmer	Labor	35	Hi	med	NA	NA	1	c	1	2	2	1	c	NA	a	1	buy	a	a	Kĩ năng sống Cậu bé bút chì	yes	b	a	1	Phong cách sống Cậu bé bút chì Doraemon
2817	16.283	43074	16	7	Male	4.2	0	1	0	2	2	1	a	Thợ xây	Worker	Nông dân	Farmer	Labor	38	NA	Công nhân	Worker	Labor	35	Hi	med	no	NA	1	e	1	1	1	1	a	NA	a	1	buy	a	a	Conan Doraemon	yes	a	a	1	Gulivo và xứ sở tí hon Cô bé ngủ trong rừng Nàng bạch tuyết và 7 chú lùn
2861	16.32	43074	16	7	Female	4.2	0	1	0	2	3	1	NA	Bác sĩ	Doctor	Lái máy xúc	Driver	Labor	39	UnderHi	Nông dân	Farmer	Labor	38	UnderHi	rich	yes	NA	1	a	0	2	NA	0	e	NA	a	1	buy	d	NA	Truyện cây khế Tấm cám	yes	b	a	1	Dế mèn phiêu lưu kí Conan Doraemon
3328	3.56	43071	6	9	Male	4.13	0	1	0	1	2	0	e	Bộ đội	Soldier	Thợ xây	Worker	Labor	NA	UnderHi	Nông dân	Farmer	Labor	NA	UnderHi	rich	no	NA	1	b	1	1	2	0	e	NA	a	1	borrow	a	d	Thép đã tôi thế đấy Vũ khí chiến tranh	no	d	a	1	Rèn luyện ý chí Tu dưỡng đạo đức Nhân nghĩa
[truncated: 3,464 more rows]
